# Supplementary material for: Solution structures by NMR of a novel antifungal drug: Petriellin A
Source: Royal Society of Chemistry journal article supplement (doi:10.1039/b608434f), 2006-01-01
Supplement: b608434f.pdf [file b608434f.pdf]

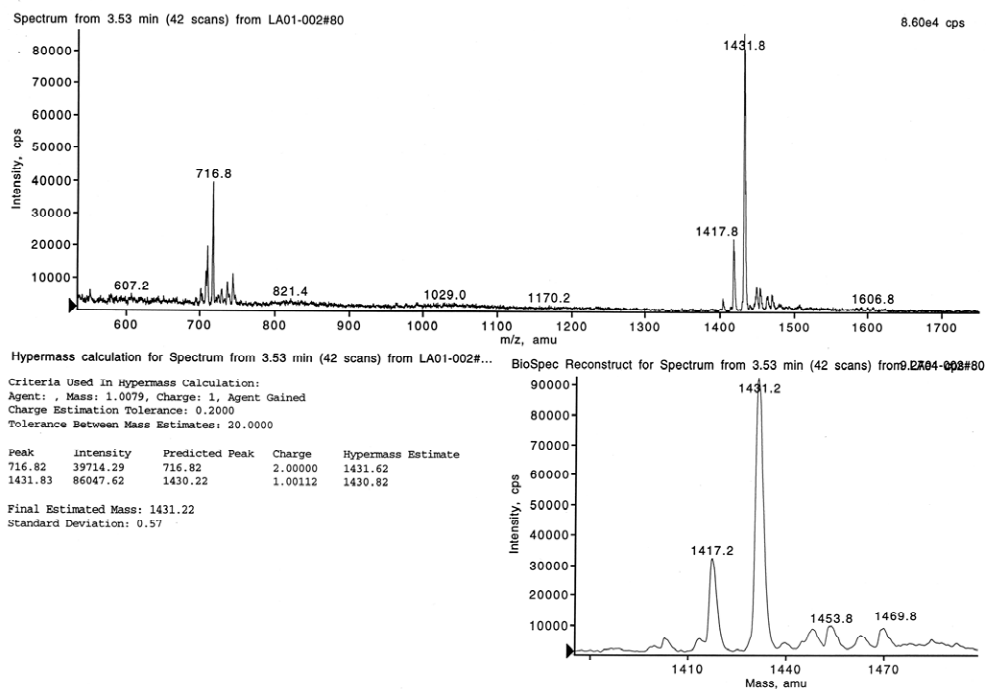

Mass Spectra of Petriellin A

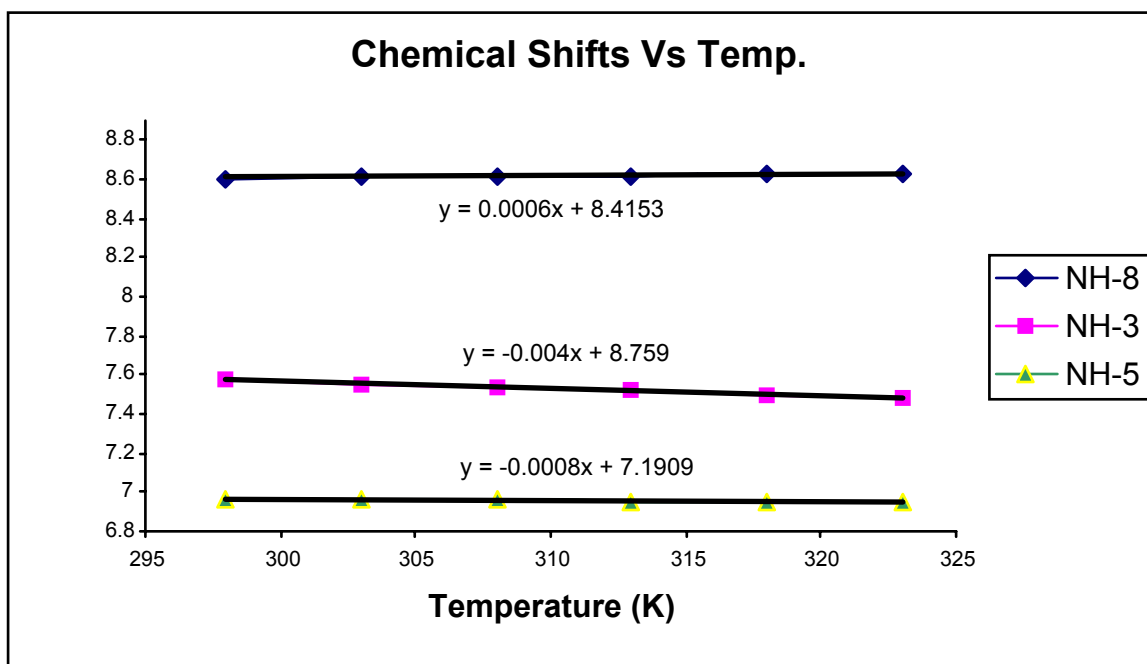

Graphs showing the results of the 1D <sup>1</sup>H experiment with variable temperature. The proton chemical shifts are on the Y-axis and temperatures in Kelvin are on the X-axis.

| HEADER | Petriellin A structure from MOLMOL for RasMol |      |     |   |        |        |       |      |      |
|--------|-----------------------------------------------|------|-----|---|--------|--------|-------|------|------|
| COMPND | 20_accelrys001                                |      |     |   |        |        |       |      |      |
| ATOM   | 1                                             | N    | VAL | 1 | 4.088  | -2.859 | 1.592 | 1.00 | 0.00 |
| ATOM   | 2                                             | CA   | VAL | 1 | 2.848  | -3.297 | 2.373 | 1.00 | 0.00 |
| ATOM   | 3                                             | HA   | VAL | 1 | 2.512  | -4.216 | 1.861 | 1.00 | 0.00 |
| ATOM   | 4                                             | CB   | VAL | 1 | 2.983  | -3.792 | 3.869 | 1.00 | 0.00 |
| ATOM   | 5                                             | HB   | VAL | 1 | 1.966  | -4.115 | 4.162 | 1.00 | 0.00 |
| ATOM   | 6                                             | QG1  | VAL | 1 | 4.078  | -5.404 | 4.084 | 1.00 | 0.00 |
| ATOM   | 7                                             | QG2  | VAL | 1 | 3.460  | -2.471 | 5.240 | 1.00 | 0.00 |
| ATOM   | 8                                             | CG1  | VAL | 1 | 3.849  | -5.059 | 4.038 | 1.00 | 0.00 |
| ATOM   | 9                                             | 1HG1 | VAL | 1 | 3.799  | -5.459 | 5.068 | 1.00 | 0.00 |
| ATOM   | 10                                            | 2HG1 | VAL | 1 | 3.518  | -5.873 | 3.367 | 1.00 | 0.00 |
| ATOM   | 11                                            | 3HG1 | VAL | 1 | 4.916  | -4.881 | 3.818 | 1.00 | 0.00 |
| ATOM   | 12                                            | CG2  | VAL | 1 | 3.367  | -2.748 | 4.944 | 1.00 | 0.00 |
| ATOM   | 13                                            | 1HG2 | VAL | 1 | 4.434  | -2.469 | 4.921 | 1.00 | 0.00 |
| ATOM   | 14                                            | 2HG2 | VAL | 1 | 2.781  | -1.815 | 4.837 | 1.00 | 0.00 |
| ATOM   | 15                                            | 3HG2 | VAL | 1 | 3.166  | -3.128 | 5.963 | 1.00 | 0.00 |
| ATOM   | 16                                            | QQG  | VAL | 1 | 3.769  | -3.938 | 4.662 | 1.00 | 0.00 |
| ATOM   | 17                                            | C    | VAL | 1 | 1.645  | -2.272 | 2.216 | 1.00 | 0.00 |
| ATOM   | 18                                            | O    | VAL | 1 | 1.900  | -1.063 | 2.256 | 1.00 | 0.00 |
| ATOM   | 19                                            | CN   | VAL | 1 | 5.246  | -2.259 | 2.319 | 1.00 | 0.00 |
| ATOM   | 20                                            | 1H   | VAL | 1 | 5.701  | -2.983 | 3.016 | 1.00 | 0.00 |
| ATOM   | 21                                            | 2H   | VAL | 1 | 6.082  | -1.910 | 1.692 | 1.00 | 0.00 |
| ATOM   | 22                                            | 3H   | VAL | 1 | 4.923  | -1.389 | 2.921 | 1.00 | 0.00 |
| ATOM   | 23                                            | N    | PRO | 2 | 0.340  | -2.669 | 2.045 | 1.00 | 0.00 |
| ATOM   | 24                                            | CD   | PRO | 2 | -0.084 | -4.081 | 1.950 | 1.00 | 0.00 |
| ATOM   | 25                                            | CA   | PRO | 2 | -0.769 | -1.707 | 1.764 | 1.00 | 0.00 |
| ATOM   | 26                                            | HA   | PRO | 2 | -0.494 | -1.056 | 0.910 | 1.00 | 0.00 |
| ATOM   | 27                                            | CB   | PRO | 2 | -1.883 | -2.654 | 1.270 | 1.00 | 0.00 |
| ATOM   | 28                                            | 1HB  | PRO | 2 | -2.898 | -2.269 | 1.479 | 1.00 | 0.00 |
| ATOM   | 29                                            | 2HB  | PRO | 2 | -1.826 | -2.773 | 0.170 | 1.00 | 0.00 |
| ATOM   | 30                                            | QB   | PRO | 2 | -2.362 | -2.521 | 0.824 | 1.00 | 0.00 |
| ATOM   | 31                                            | CG   | PRO | 2 | -1.607 | -3.985 | 1.968 | 1.00 | 0.00 |
| ATOM   | 32                                            | 1HG  | PRO | 2 | -1.979 | -3.949 | 3.012 | 1.00 | 0.00 |
| ATOM   | 33                                            | 2HG  | PRO | 2 | -2.096 | -4.846 | 1.478 | 1.00 | 0.00 |
| ATOM   | 34                                            | QG   | PRO | 2 | -2.037 | -4.398 | 2.245 | 1.00 | 0.00 |
| ATOM   | 35                                            | 1HD  | PRO | 2 | 0.282  | -4.711 | 2.782 | 1.00 | 0.00 |
| ATOM   | 36                                            | 2HD  | PRO | 2 | 0.271  | -4.533 | 1.000 | 1.00 | 0.00 |
| ATOM   | 37                                            | QD   | PRO | 2 | 0.276  | -4.622 | 1.891 | 1.00 | 0.00 |
| ATOM   | 38                                            | C    | PRO | 2 | -1.200 | -0.789 | 2.959 | 1.00 | 0.00 |
| ATOM   | 39                                            | O    | PRO | 2 | -2.089 | -1.113 | 3.752 | 1.00 | 0.00 |
| ATOM   | 40                                            | N    | ILE | 3 | -0.567 | 0.388  | 3.048 | 1.00 | 0.00 |
| ATOM   | 41                                            | H    | ILE | 3 | 0.313  | 0.393  | 2.519 | 1.00 | 0.00 |
| ATOM   | 42                                            | CA   | ILE | 3 | -0.855 | 1.402  | 4.114 | 1.00 | 0.00 |
| ATOM   | 43                                            | HA   | ILE | 3 | -0.917 | 0.810  | 5.051 | 1.00 | 0.00 |
| ATOM   | 44                                            | CB   | ILE | 3 | 0.370  | 2.360  | 4.369 | 1.00 | 0.00 |
| ATOM   | 45                                            | HB   | ILE | 3 | 0.072  | 3.029  | 5.203 | 1.00 | 0.00 |
| ATOM   | 46                                            | QG2  | ILE | 3 | 1.929  | 1.387  | 5.069 | 1.00 | 0.00 |
| ATOM   | 47                                            | CG2  | ILE | 3 | 1.603  | 1.591  | 4.918 | 1.00 | 0.00 |
| ATOM   | 48                                            | 1HG2 | ILE | 3 | 2.419  | 2.275  | 5.215 | 1.00 | 0.00 |
| ATOM   | 49                                            | 2HG2 | ILE | 3 | 1.348  | 0.997  | 5.816 | 1.00 | 0.00 |
| ATOM   | 50                                            | 3HG2 | ILE | 3 | 2.019  | 0.887  | 4.174 | 1.00 | 0.00 |
| ATOM   | 51                                            | CG1  | ILE | 3 | 0.821  | 3.275  | 3.189 | 1.00 | 0.00 |
| ATOM   | 52                                            | 1HG1 | ILE | 3 | 1.893  | 3.541  | 3.285 | 1.00 | 0.00 |
| ATOM   | 53                                            | 2HG1 | ILE | 3 | 0.775  | 2.726  | 2.229 | 1.00 | 0.00 |
| ATOM   | 54                                            | QG1  | ILE | 3 | 1.334  | 3.134  | 2.757 | 1.00 | 0.00 |
| ATOM   | 55                                            | QD1  | ILE | 3 | -0.142 | 4.963  | 3.040 | 1.00 | 0.00 |
| ATOM   | 56                                            | CD1  | ILE | 3 | 0.056  | 4.604  | 3.074 | 1.00 | 0.00 |
| ATOM   | 57                                            | 1HD1 | ILE | 3 | 0.188  | 5.233  | 3.975 | 1.00 | 0.00 |

|      |     |      |     |   |        |        |        |      |      |
|------|-----|------|-----|---|--------|--------|--------|------|------|
| ATOM | 58  | 2HD1 | ILE | 3 | 0.416  | 5.195  | 2.210  | 1.00 | 0.00 |
| ATOM | 59  | 3HD1 | ILE | 3 | -1.030 | 4.462  | 2.936  | 1.00 | 0.00 |
| ATOM | 60  | C    | ILE | 3 | -2.264 | 2.127  | 4.117  | 1.00 | 0.00 |
| ATOM | 61  | O    | ILE | 3 | -2.709 | 2.352  | 5.249  | 1.00 | 0.00 |
| ATOM | 62  | N    | PIP | 4 | -3.020 | 2.505  | 3.022  | 1.00 | 0.00 |
| ATOM | 63  | CE   | PIP | 4 | -2.526 | 2.334  | 1.612  | 1.00 | 0.00 |
| ATOM | 64  | CA   | PIP | 4 | -4.455 | 2.973  | 3.227  | 1.00 | 0.00 |
| ATOM | 65  | HA   | PIP | 4 | -4.522 | 3.477  | 4.211  | 1.00 | 0.00 |
| ATOM | 66  | CB   | PIP | 4 | -4.841 | 4.106  | 2.224  | 1.00 | 0.00 |
| ATOM | 67  | 2HB  | PIP | 4 | -4.309 | 5.030  | 2.522  | 1.00 | 0.00 |
| ATOM | 68  | QB   | PIP | 4 | -4.309 | 5.030  | 2.522  | 1.00 | 0.00 |
| ATOM | 69  | CG   | PIP | 4 | -4.494 | 3.788  | 0.754  | 1.00 | 0.00 |
| ATOM | 70  | 2HG  | PIP | 4 | -5.107 | 2.940  | 0.394  | 1.00 | 0.00 |
| ATOM | 71  | QG   | PIP | 4 | -5.107 | 2.940  | 0.394  | 1.00 | 0.00 |
| ATOM | 72  | CD   | PIP | 4 | -2.991 | 3.455  | 0.649  | 1.00 | 0.00 |
| ATOM | 73  | 2HD  | PIP | 4 | -2.736 | 3.182  | -0.391 | 1.00 | 0.00 |
| ATOM | 74  | QD   | PIP | 4 | -2.736 | 3.182  | -0.391 | 1.00 | 0.00 |
| ATOM | 75  | 1HE  | PIP | 4 | -1.424 | 2.314  | 1.556  | 1.00 | 0.00 |
| ATOM | 76  | 2HE  | PIP | 4 | -2.850 | 1.348  | 1.225  | 1.00 | 0.00 |
| ATOM | 77  | QE   | PIP | 4 | -2.138 | 1.830  | 1.391  | 1.00 | 0.00 |
| ATOM | 78  | C    | PIP | 4 | -5.547 | 1.847  | 3.327  | 1.00 | 0.00 |
| ATOM | 79  | O    | PIP | 4 | -6.426 | 1.942  | 4.188  | 1.00 | 0.00 |
| ATOM | 80  | 1HB  | PIP | 4 | -5.915 | 4.357  | 2.320  | 1.00 | 0.00 |
| ATOM | 81  | 1HG  | PIP | 4 | -4.749 | 4.643  | 0.099  | 1.00 | 0.00 |
| ATOM | 82  | 1HD  | PIP | 4 | -2.402 | 4.370  | 0.858  | 1.00 | 0.00 |
| ATOM | 83  | N    | ALA | 5 | -5.543 | 0.820  | 2.454  | 1.00 | 0.00 |
| ATOM | 84  | H    | ALA | 5 | -4.710 | 0.793  | 1.859  | 1.00 | 0.00 |
| ATOM | 85  | CA   | ALA | 5 | -6.544 | -0.282 | 2.486  | 1.00 | 0.00 |
| ATOM | 86  | HA   | ALA | 5 | -6.856 | -0.430 | 3.537  | 1.00 | 0.00 |
| ATOM | 87  | QB   | ALA | 5 | -8.115 | 0.297  | 1.476  | 1.00 | 0.00 |
| ATOM | 88  | CB   | ALA | 5 | -7.784 | 0.176  | 1.685  | 1.00 | 0.00 |
| ATOM | 89  | 1HB  | ALA | 5 | -7.543 | 0.377  | 0.625  | 1.00 | 0.00 |
| ATOM | 90  | 2HB  | ALA | 5 | -8.582 | -0.588 | 1.698  | 1.00 | 0.00 |
| ATOM | 91  | 3HB  | ALA | 5 | -8.221 | 1.102  | 2.105  | 1.00 | 0.00 |
| ATOM | 92  | C    | ALA | 5 | -5.995 | -1.657 | 1.936  | 1.00 | 0.00 |
| ATOM | 93  | O    | ALA | 5 | -5.296 | -1.643 | 0.916  | 1.00 | 0.00 |
| ATOM | 94  | N    | PRO | 6 | -6.314 | -2.860 | 2.512  | 1.00 | 0.00 |
| ATOM | 95  | CD   | PRO | 6 | -7.099 | -2.989 | 3.757  | 1.00 | 0.00 |
| ATOM | 96  | CA   | PRO | 6 | -5.897 | -4.171 | 1.931  | 1.00 | 0.00 |
| ATOM | 97  | HA   | PRO | 6 | -4.804 | -4.187 | 1.807  | 1.00 | 0.00 |
| ATOM | 98  | CB   | PRO | 6 | -6.186 | -5.127 | 3.109  | 1.00 | 0.00 |
| ATOM | 99  | 1HB  | PRO | 6 | -6.411 | -6.161 | 2.781  | 1.00 | 0.00 |
| ATOM | 100 | 2HB  | PRO | 6 | -5.299 | -5.195 | 3.767  | 1.00 | 0.00 |
| ATOM | 101 | QB   | PRO | 6 | -5.855 | -5.678 | 3.274  | 1.00 | 0.00 |
| ATOM | 102 | CG   | PRO | 6 | -7.351 | -4.492 | 3.873  | 1.00 | 0.00 |
| ATOM | 103 | 1HG  | PRO | 6 | -8.311 | -4.753 | 3.383  | 1.00 | 0.00 |
| ATOM | 104 | 2HG  | PRO | 6 | -7.417 | -4.835 | 4.923  | 1.00 | 0.00 |
| ATOM | 105 | QG   | PRO | 6 | -7.864 | -4.794 | 4.153  | 1.00 | 0.00 |
| ATOM | 106 | 1HD  | PRO | 6 | -8.056 | -2.432 | 3.721  | 1.00 | 0.00 |
| ATOM | 107 | 2HD  | PRO | 6 | -6.518 | -2.616 | 4.623  | 1.00 | 0.00 |
| ATOM | 108 | QD   | PRO | 6 | -7.287 | -2.524 | 4.172  | 1.00 | 0.00 |
| ATOM | 109 | C    | PRO | 6 | -6.650 | -4.549 | 0.585  | 1.00 | 0.00 |
| ATOM | 110 | O    | PRO | 6 | -7.867 | -4.759 | 0.683  | 1.00 | 0.00 |
| ATOM | 111 | N    | THR | 7 | -6.056 | -4.649 | -0.658 | 1.00 | 0.00 |
| ATOM | 112 | CA   | THR | 7 | -4.569 | -4.445 | -0.881 | 1.00 | 0.00 |
| ATOM | 113 | HA   | THR | 7 | -4.141 | -3.881 | -0.042 | 1.00 | 0.00 |
| ATOM | 114 | CB   | THR | 7 | -3.779 | -5.801 | -0.833 | 1.00 | 0.00 |
| ATOM | 115 | HB   | THR | 7 | -3.951 | -6.257 | 0.164  | 1.00 | 0.00 |
| ATOM | 116 | QG2  | THR | 7 | -4.186 | -7.151 | -2.175 | 1.00 | 0.00 |

|      |     |      |     |    |        |        |        |      |      |
|------|-----|------|-----|----|--------|--------|--------|------|------|
| ATOM | 117 | OG1  | THR | 7  | -2.386 | -5.548 | -0.962 | 1.00 | 0.00 |
| ATOM | 118 | 1HG  | THR | 7  | -2.269 | -5.238 | -1.869 | 1.00 | 0.00 |
| ATOM | 119 | CG2  | THR | 7  | -4.100 | -6.863 | -1.895 | 1.00 | 0.00 |
| ATOM | 120 | 1HG2 | THR | 7  | -3.447 | -7.749 | -1.791 | 1.00 | 0.00 |
| ATOM | 121 | 2HG2 | THR | 7  | -5.142 | -7.224 | -1.808 | 1.00 | 0.00 |
| ATOM | 122 | 3HG2 | THR | 7  | -3.970 | -6.480 | -2.925 | 1.00 | 0.00 |
| ATOM | 123 | C    | THR | 7  | -4.174 | -3.488 | -2.063 | 1.00 | 0.00 |
| ATOM | 124 | O    | THR | 7  | -3.590 | -3.911 | -3.068 | 1.00 | 0.00 |
| ATOM | 125 | CN   | THR | 7  | -6.919 | -4.961 | -1.841 | 1.00 | 0.00 |
| ATOM | 126 | 1H   | THR | 7  | -7.635 | -4.141 | -2.037 | 1.00 | 0.00 |
| ATOM | 127 | 2H   | THR | 7  | -6.342 | -5.114 | -2.773 | 1.00 | 0.00 |
| ATOM | 128 | 3H   | THR | 7  | -7.511 | -5.883 | -1.681 | 1.00 | 0.00 |
| ATOM | 129 | N    | VAL | 8  | -4.424 | -2.179 | -1.903 | 1.00 | 0.00 |
| ATOM | 130 | H    | VAL | 8  | -4.857 | -1.937 | -1.000 | 1.00 | 0.00 |
| ATOM | 131 | CA   | VAL | 8  | -3.876 | -1.126 | -2.815 | 1.00 | 0.00 |
| ATOM | 132 | HA   | VAL | 8  | -3.853 | -1.561 | -3.829 | 1.00 | 0.00 |
| ATOM | 133 | CB   | VAL | 8  | -4.824 | 0.121  | -2.946 | 1.00 | 0.00 |
| ATOM | 134 | HB   | VAL | 8  | -4.291 | 0.853  | -3.587 | 1.00 | 0.00 |
| ATOM | 135 | QG1  | VAL | 8  | -6.500 | -0.287 | -3.872 | 1.00 | 0.00 |
| ATOM | 136 | QG2  | VAL | 8  | -5.253 | 1.053  | -1.278 | 1.00 | 0.00 |
| ATOM | 137 | CG1  | VAL | 8  | -6.148 | -0.201 | -3.677 | 1.00 | 0.00 |
| ATOM | 138 | 1HG1 | VAL | 8  | -6.758 | 0.706  | -3.848 | 1.00 | 0.00 |
| ATOM | 139 | 2HG1 | VAL | 8  | -5.971 | -0.658 | -4.668 | 1.00 | 0.00 |
| ATOM | 140 | 3HG1 | VAL | 8  | -6.772 | -0.910 | -3.101 | 1.00 | 0.00 |
| ATOM | 141 | CG2  | VAL | 8  | -5.165 | 0.857  | -1.630 | 1.00 | 0.00 |
| ATOM | 142 | 1HG2 | VAL | 8  | -5.735 | 0.215  | -0.934 | 1.00 | 0.00 |
| ATOM | 143 | 2HG2 | VAL | 8  | -4.255 | 1.176  | -1.094 | 1.00 | 0.00 |
| ATOM | 144 | 3HG2 | VAL | 8  | -5.768 | 1.767  | -1.805 | 1.00 | 0.00 |
| ATOM | 145 | QQG  | VAL | 8  | -5.877 | 0.383  | -2.575 | 1.00 | 0.00 |
| ATOM | 146 | C    | VAL | 8  | -2.394 | -0.736 | -2.408 | 1.00 | 0.00 |
| ATOM | 147 | O    | VAL | 8  | -2.213 | -0.358 | -1.243 | 1.00 | 0.00 |
| ATOM | 148 | N    | THR | 9  | -1.325 | -0.807 | -3.275 | 1.00 | 0.00 |
| ATOM | 149 | CA   | THR | 9  | 0.086  | -0.566 | -2.767 | 1.00 | 0.00 |
| ATOM | 150 | HA   | THR | 9  | 0.066  | -0.297 | -1.696 | 1.00 | 0.00 |
| ATOM | 151 | CB   | THR | 9  | 0.995  | -1.846 | -2.747 | 1.00 | 0.00 |
| ATOM | 152 | HB   | THR | 9  | 1.916  | -1.576 | -2.194 | 1.00 | 0.00 |
| ATOM | 153 | QG2  | THR | 9  | 0.267  | -3.413 | -1.866 | 1.00 | 0.00 |
| ATOM | 154 | OG1  | THR | 9  | 1.377  | -2.242 | -4.060 | 1.00 | 0.00 |
| ATOM | 155 | 1HG  | THR | 9  | 1.589  | -1.418 | -4.520 | 1.00 | 0.00 |
| ATOM | 156 | CG2  | THR | 9  | 0.414  | -3.084 | -2.051 | 1.00 | 0.00 |
| ATOM | 157 | 1HG2 | THR | 9  | 1.126  | -3.929 | -2.082 | 1.00 | 0.00 |
| ATOM | 158 | 2HG2 | THR | 9  | 0.198  | -2.884 | -0.988 | 1.00 | 0.00 |
| ATOM | 159 | 3HG2 | THR | 9  | -0.522 | -3.426 | -2.528 | 1.00 | 0.00 |
| ATOM | 160 | C    | THR | 9  | 0.784  | 0.665  | -3.477 | 1.00 | 0.00 |
| ATOM | 161 | O    | THR | 9  | 1.524  | 0.413  | -4.440 | 1.00 | 0.00 |
| ATOM | 162 | CN   | THR | 9  | -1.516 | -1.208 | -4.700 | 1.00 | 0.00 |
| ATOM | 163 | 1H   | THR | 9  | -1.820 | -2.271 | -4.781 | 1.00 | 0.00 |
| ATOM | 164 | 2H   | THR | 9  | -2.280 | -0.588 | -5.209 | 1.00 | 0.00 |
| ATOM | 165 | 3H   | THR | 9  | -0.593 | -1.103 | -5.301 | 1.00 | 0.00 |
| ATOM | 166 | N    | VAL | 10 | 0.594  | 1.970  | -3.084 | 1.00 | 0.00 |
| ATOM | 167 | CA   | VAL | 10 | 1.296  | 3.105  | -3.812 | 1.00 | 0.00 |
| ATOM | 168 | HA   | VAL | 10 | 1.932  | 2.712  | -4.622 | 1.00 | 0.00 |
| ATOM | 169 | CB   | VAL | 10 | 0.295  | 4.049  | -4.585 | 1.00 | 0.00 |
| ATOM | 170 | HB   | VAL | 10 | -0.365 | 4.528  | -3.834 | 1.00 | 0.00 |
| ATOM | 171 | QG1  | VAL | 10 | 1.187  | 5.493  | -5.570 | 1.00 | 0.00 |
| ATOM | 172 | QG2  | VAL | 10 | -0.852 | 3.109  | -5.869 | 1.00 | 0.00 |
| ATOM | 173 | CG1  | VAL | 10 | 1.000  | 5.183  | -5.366 | 1.00 | 0.00 |
| ATOM | 174 | 1HG1 | VAL | 10 | 1.686  | 4.795  | -6.142 | 1.00 | 0.00 |
| ATOM | 175 | 2HG1 | VAL | 10 | 0.277  | 5.853  | -5.871 | 1.00 | 0.00 |

|      |     |      |      |    |        |        |        |      |      |
|------|-----|------|------|----|--------|--------|--------|------|------|
| ATOM | 176 | 3HG1 | VAL  | 10 | 1.599  | 5.830  | -4.697 | 1.00 | 0.00 |
| ATOM | 177 | CG2  | VAL  | 10 | -0.607 | 3.310  | -5.603 | 1.00 | 0.00 |
| ATOM | 178 | 1HG2 | VAL  | 10 | -1.315 | 3.993  | -6.110 | 1.00 | 0.00 |
| ATOM | 179 | 2HG2 | VAL  | 10 | -0.018 | 2.800  | -6.388 | 1.00 | 0.00 |
| ATOM | 180 | 3HG2 | VAL  | 10 | -1.223 | 2.533  | -5.110 | 1.00 | 0.00 |
| ATOM | 181 | QOG  | VAL  | 10 | 0.168  | 4.301  | -5.720 | 1.00 | 0.00 |
| ATOM | 182 | C    | VAL  | 10 | 2.270  | 3.843  | -2.805 | 1.00 | 0.00 |
| ATOM | 183 | O    | VAL  | 10 | 1.785  | 4.777  | -2.158 | 1.00 | 0.00 |
| ATOM | 184 | CN   | VAL  | 10 | -0.298 | 2.297  | -1.927 | 1.00 | 0.00 |
| ATOM | 185 | 1H   | VAL  | 10 | -1.331 | 1.940  | -2.089 | 1.00 | 0.00 |
| ATOM | 186 | 2H   | VAL  | 10 | 0.076  | 1.860  | -0.982 | 1.00 | 0.00 |
| ATOM | 187 | 3H   | VAL  | 10 | -0.374 | 3.384  | -1.743 | 1.00 | 0.00 |
| ATOM | 188 | N    | ILE  | 11 | 3.579  | 3.451  | -2.588 | 1.00 | 0.00 |
| ATOM | 189 | CA   | ILE  | 11 | 4.335  | 3.888  | -1.344 | 1.00 | 0.00 |
| ATOM | 190 | HA   | ILE  | 11 | 5.392  | 3.660  | -1.527 | 1.00 | 0.00 |
| ATOM | 191 | CB   | ILE  | 11 | 4.446  | 5.439  | -1.044 | 1.00 | 0.00 |
| ATOM | 192 | HB   | ILE  | 11 | 3.435  | 5.788  | -0.755 | 1.00 | 0.00 |
| ATOM | 193 | QG2  | ILE  | 11 | 5.626  | 5.819  | 0.487  | 1.00 | 0.00 |
| ATOM | 194 | CG2  | ILE  | 11 | 5.383  | 5.736  | 0.160  | 1.00 | 0.00 |
| ATOM | 195 | 1HG2 | ILE  | 11 | 5.059  | 5.206  | 1.076  | 1.00 | 0.00 |
| ATOM | 196 | 2HG2 | ILE  | 11 | 6.429  | 5.442  | -0.038 | 1.00 | 0.00 |
| ATOM | 197 | 3HG2 | ILE  | 11 | 5.389  | 6.809  | 0.424  | 1.00 | 0.00 |
| ATOM | 198 | CG1  | ILE  | 11 | 4.911  | 6.279  | -2.273 | 1.00 | 0.00 |
| ATOM | 199 | 1HG1 | ILE  | 11 | 5.978  | 6.082  | -2.494 | 1.00 | 0.00 |
| ATOM | 200 | 2HG1 | ILE  | 11 | 4.372  | 5.935  | -3.176 | 1.00 | 0.00 |
| ATOM | 201 | QG1  | ILE  | 11 | 5.175  | 6.009  | -2.835 | 1.00 | 0.00 |
| ATOM | 202 | QD1  | ILE  | 11 | 4.595  | 8.198  | -2.141 | 1.00 | 0.00 |
| ATOM | 203 | CD1  | ILE  | 11 | 4.663  | 7.795  | -2.165 | 1.00 | 0.00 |
| ATOM | 204 | 1HD1 | ILE  | 11 | 4.940  | 8.315  | -3.099 | 1.00 | 0.00 |
| ATOM | 205 | 2HD1 | ILE  | 11 | 3.596  | 8.018  | -1.972 | 1.00 | 0.00 |
| ATOM | 206 | 3HD1 | ILE  | 11 | 5.250  | 8.261  | -1.352 | 1.00 | 0.00 |
| ATOM | 207 | C    | ILE  | 11 | 3.837  | 3.019  | -0.110 | 1.00 | 0.00 |
| ATOM | 208 | O    | ILE  | 11 | 2.753  | 3.360  | 0.383  | 1.00 | 0.00 |
| ATOM | 209 | CN   | ILE  | 11 | 4.201  | 2.383  | -3.421 | 1.00 | 0.00 |
| ATOM | 210 | 1H   | ILE  | 11 | 5.269  | 2.211  | -3.189 | 1.00 | 0.00 |
| ATOM | 211 | 2H   | ILE  | 11 | 3.693  | 1.411  | -3.268 | 1.00 | 0.00 |
| ATOM | 212 | 3H   | ILE  | 11 | 4.162  | 2.622  | -4.500 | 1.00 | 0.00 |
| ATOM | 213 | N    | PIPO | 12 | 4.509  | 1.946  | 0.443  | 1.00 | 0.00 |
| ATOM | 214 | CE   | PIPO | 12 | 4.031  | 1.353  | 1.739  | 1.00 | 0.00 |
| ATOM | 215 | CA   | PIPO | 12 | 5.912  | 1.525  | 0.045  | 1.00 | 0.00 |
| ATOM | 216 | HA   | PIPO | 12 | 6.247  | 1.996  | -0.889 | 1.00 | 0.00 |
| ATOM | 217 | CB   | PIPO | 12 | 6.858  | 2.045  | 1.186  | 1.00 | 0.00 |
| ATOM | 218 | 2HB  | PIPO | 12 | 6.838  | 3.151  | 1.193  | 1.00 | 0.00 |
| ATOM | 219 | QB   | PIPO | 12 | 6.838  | 3.151  | 1.193  | 1.00 | 0.00 |
| ATOM | 220 | CG   | PIPO | 12 | 6.473  | 1.526  | 2.602  | 1.00 | 0.00 |
| ATOM | 221 | 2HG  | PIPO | 12 | 6.684  | 0.443  | 2.672  | 1.00 | 0.00 |
| ATOM | 222 | QG   | PIPO | 12 | 6.684  | 0.443  | 2.672  | 1.00 | 0.00 |
| ATOM | 223 | CD   | PIPO | 12 | 4.972  | 1.792  | 2.894  | 1.00 | 0.00 |
| ATOM | 224 | 2HD  | PIPO | 12 | 4.668  | 1.295  | 3.833  | 1.00 | 0.00 |
| ATOM | 225 | QD   | PIPO | 12 | 4.668  | 1.295  | 3.833  | 1.00 | 0.00 |
| ATOM | 226 | 1HE  | PIPO | 12 | 2.982  | 1.614  | 1.980  | 1.00 | 0.00 |
| ATOM | 227 | 2HE  | PIPO | 12 | 4.008  | 0.252  | 1.656  | 1.00 | 0.00 |
| ATOM | 228 | QE   | PIPO | 12 | 3.495  | 0.933  | 1.818  | 1.00 | 0.00 |
| ATOM | 229 | C    | PIPO | 12 | 6.170  | 0.011  | -0.285 | 1.00 | 0.00 |
| ATOM | 230 | O    | PIPO | 12 | 7.316  | -0.456 | -0.299 | 1.00 | 0.00 |
| ATOM | 231 | 1HB  | PIPO | 12 | 7.912  | 1.786  | 0.964  | 1.00 | 0.00 |
| ATOM | 232 | 1HG  | PIPO | 12 | 7.106  | 2.002  | 3.374  | 1.00 | 0.00 |
| ATOM | 233 | 1HD  | PIPO | 12 | 4.819  | 2.874  | 3.076  | 1.00 | 0.00 |
| ATOM | 234 | OL'  | PHEO | 13 | 5.011  | -0.723 | -0.555 | 1.00 | 0.00 |

Supplementary Material for Organic & Biomolecular Chemistry  
This journal is © The Royal Society of Chemistry 2006

|      |     |     |      |    |       |        |        |      |      |
|------|-----|-----|------|----|-------|--------|--------|------|------|
| ATOM | 235 | CA  | PHEO | 13 | 5.111 | -2.184 | -0.715 | 1.00 | 0.00 |
| ATOM | 236 | HA  | PHEO | 13 | 6.095 | -2.570 | -0.385 | 1.00 | 0.00 |
| ATOM | 237 | CB  | PHEO | 13 | 4.991 | -2.561 | -2.225 | 1.00 | 0.00 |
| ATOM | 238 | 1HB | PHEO | 13 | 5.156 | -3.649 | -2.338 | 1.00 | 0.00 |
| ATOM | 239 | 2HB | PHEO | 13 | 3.941 | -2.430 | -2.544 | 1.00 | 0.00 |
| ATOM | 240 | QB  | PHEO | 13 | 4.549 | -3.040 | -2.441 | 1.00 | 0.00 |
| ATOM | 241 | QD  | PHEO | 13 | 6.023 | -1.744 | -3.322 | 1.00 | 0.00 |
| ATOM | 242 | QE  | PHEO | 13 | 7.496 | -0.543 | -4.889 | 1.00 | 0.00 |
| ATOM | 243 | QR  | PHEO | 13 | 7.055 | -0.902 | -4.419 | 1.00 | 0.00 |
| ATOM | 244 | CG  | PHEO | 13 | 5.918 | -1.823 | -3.202 | 1.00 | 0.00 |
| ATOM | 245 | CD1 | PHEO | 13 | 5.379 | -0.938 | -4.143 | 1.00 | 0.00 |
| ATOM | 246 | 1HD | PHEO | 13 | 4.312 | -0.777 | -4.191 | 1.00 | 0.00 |
| ATOM | 247 | CE1 | PHEO | 13 | 6.213 | -0.261 | -5.029 | 1.00 | 0.00 |
| ATOM | 248 | 1HE | PHEO | 13 | 5.790 | 0.419  | -5.756 | 1.00 | 0.00 |
| ATOM | 249 | CZ  | PHEO | 13 | 7.590 | -0.463 | -4.983 | 1.00 | 0.00 |
| ATOM | 250 | HZ  | PHEO | 13 | 8.235 | 0.062  | -5.671 | 1.00 | 0.00 |
| ATOM | 251 | CE2 | PHEO | 13 | 8.134 | -1.348 | -4.057 | 1.00 | 0.00 |
| ATOM | 252 | 2HE | PHEO | 13 | 9.203 | -1.506 | -4.022 | 1.00 | 0.00 |
| ATOM | 253 | CD2 | PHEO | 13 | 7.302 | -2.031 | -3.173 | 1.00 | 0.00 |
| ATOM | 254 | 2HD | PHEO | 13 | 7.735 | -2.711 | -2.454 | 1.00 | 0.00 |
| ATOM | 255 | C   | PHEO | 13 | 4.049 | -2.887 | 0.211  | 1.00 | 0.00 |
| ATOM | 256 | O   | PHEO | 13 | 3.113 | -3.471 | -0.344 | 1.00 | 0.00 |

TER  
END

| HEADER | 20 Petriellin A Structures from MOLMOL |      |      |   |        |        |        |      |      |
|--------|----------------------------------------|------|------|---|--------|--------|--------|------|------|
| COMPND | PET001                                 |      |      |   |        |        |        |      |      |
| MODEL  | 1                                      |      |      |   |        |        |        |      |      |
| ATOM   | 1                                      | N    | VALM | 1 | 0.119  | 3.224  | -5.052 | 1.00 | 0.00 |
| ATOM   | 2                                      | QB   | VALM | 1 | 1.235  | 3.028  | -6.507 | 1.00 | 0.00 |
| ATOM   | 3                                      | CN   | VALM | 1 | 1.014  | 3.067  | -6.220 | 1.00 | 0.00 |
| ATOM   | 4                                      | 1HNB | VALM | 1 | 0.820  | 2.108  | -6.702 | 1.00 | 0.00 |
| ATOM   | 5                                      | 2HNB | VALM | 1 | 0.831  | 3.874  | -6.930 | 1.00 | 0.00 |
| ATOM   | 6                                      | 3HNB | VALM | 1 | 2.053  | 3.103  | -5.890 | 1.00 | 0.00 |
| ATOM   | 7                                      | CA   | VALM | 1 | -0.352 | 2.078  | -4.279 | 1.00 | 0.00 |
| ATOM   | 8                                      | HA   | VALM | 1 | -1.326 | 2.333  | -3.822 | 1.00 | 0.00 |
| ATOM   | 9                                      | CB   | VALM | 1 | -0.532 | 0.828  | -5.229 | 1.00 | 0.00 |
| ATOM   | 10                                     | HB   | VALM | 1 | -1.387 | 0.238  | -4.835 | 1.00 | 0.00 |
| ATOM   | 11                                     | QG1  | VALM | 1 | -0.940 | 1.208  | -7.125 | 1.00 | 0.00 |
| ATOM   | 12                                     | QG2  | VALM | 1 | 1.027  | -0.362 | -5.276 | 1.00 | 0.00 |
| ATOM   | 13                                     | CG1  | VALM | 1 | -0.857 | 1.134  | -6.718 | 1.00 | 0.00 |
| ATOM   | 14                                     | 1HG1 | VALM | 1 | -1.323 | 2.129  | -6.853 | 1.00 | 0.00 |
| ATOM   | 15                                     | 2HG1 | VALM | 1 | 0.045  | 1.106  | -7.359 | 1.00 | 0.00 |
| ATOM   | 16                                     | 3HG1 | VALM | 1 | -1.544 | 0.390  | -7.162 | 1.00 | 0.00 |
| ATOM   | 17                                     | CG2  | VALM | 1 | 0.695  | -0.115 | -5.264 | 1.00 | 0.00 |
| ATOM   | 18                                     | 1HG2 | VALM | 1 | 0.451  | -1.135 | -4.911 | 1.00 | 0.00 |
| ATOM   | 19                                     | 2HG2 | VALM | 1 | 1.109  | -0.213 | -6.284 | 1.00 | 0.00 |
| ATOM   | 20                                     | 3HG2 | VALM | 1 | 1.522  | 0.263  | -4.633 | 1.00 | 0.00 |
| ATOM   | 21                                     | QQG  | VALM | 1 | 0.043  | 0.423  | -6.200 | 1.00 | 0.00 |
| ATOM   | 22                                     | C    | VALM | 1 | 0.598  | 1.762  | -3.149 | 1.00 | 0.00 |
| ATOM   | 23                                     | O    | VALM | 1 | 1.596  | 2.460  | -2.981 | 1.00 | 0.00 |
| ATOM   | 24                                     | N    | PRO  | 2 | 0.268  | 0.693  | -2.375 | 1.00 | 0.00 |
| ATOM   | 25                                     | CD   | PRO  | 2 | -0.906 | -0.159 | -2.543 | 1.00 | 0.00 |
| ATOM   | 26                                     | CA   | PRO  | 2 | 1.105  | 0.291  | -1.257 | 1.00 | 0.00 |
| ATOM   | 27                                     | HA   | PRO  | 2 | 1.416  | 1.095  | -0.750 | 1.00 | 0.00 |
| ATOM   | 28                                     | CB   | PRO  | 2 | 0.220  | -0.605 | -0.405 | 1.00 | 0.00 |
| ATOM   | 29                                     | 2HB  | PRO  | 2 | -0.157 | -0.068 | 0.465  | 1.00 | 0.00 |
| ATOM   | 30                                     | QB   | PRO  | 2 | -0.157 | -0.068 | 0.465  | 1.00 | 0.00 |
| ATOM   | 31                                     | CG   | PRO  | 2 | -0.919 | -1.046 | -1.310 | 1.00 | 0.00 |
| ATOM   | 32                                     | 2HG  | PRO  | 2 | -1.873 | -0.964 | -0.790 | 1.00 | 0.00 |
| ATOM   | 33                                     | QG   | PRO  | 2 | -1.873 | -0.964 | -0.790 | 1.00 | 0.00 |
| ATOM   | 34                                     | 2HD  | PRO  | 2 | -1.818 | 0.435  | -2.614 | 1.00 | 0.00 |
| ATOM   | 35                                     | QD   | PRO  | 2 | -1.818 | 0.435  | -2.614 | 1.00 | 0.00 |
| ATOM   | 36                                     | C    | PRO  | 2 | 2.373  | -0.411 | -1.746 | 1.00 | 0.00 |
| ATOM   | 37                                     | O    | PRO  | 2 | 2.406  | -0.939 | -2.856 | 1.00 | 0.00 |
| ATOM   | 38                                     | N    | ILE  | 3 | 3.387  | -0.393 | -0.894 | 1.00 | 0.00 |
| ATOM   | 39                                     | H    | ILE  | 3 | 3.352  | 0.039  | 0.008  | 1.00 | 0.00 |
| ATOM   | 40                                     | CA   | ILE  | 3 | 4.654  | -1.021 | -1.225 | 1.00 | 0.00 |
| ATOM   | 41                                     | HA   | ILE  | 3 | 4.649  | -1.221 | -2.296 | 1.00 | 0.00 |
| ATOM   | 42                                     | CB   | ILE  | 3 | 5.815  | -0.064 | -0.949 | 1.00 | 0.00 |
| ATOM   | 43                                     | HB   | ILE  | 3 | 6.521  | -0.564 | -0.285 | 1.00 | 0.00 |
| ATOM   | 44                                     | QG2  | ILE  | 3 | 6.747  | 0.351  | -2.544 | 1.00 | 0.00 |
| ATOM   | 45                                     | CG2  | ILE  | 3 | 6.568  | 0.272  | -2.237 | 1.00 | 0.00 |
| ATOM   | 46                                     | 1HG2 | ILE  | 3 | 7.130  | 1.196  | -2.101 | 1.00 | 0.00 |
| ATOM   | 47                                     | 2HG2 | ILE  | 3 | 7.256  | -0.539 | -2.477 | 1.00 | 0.00 |
| ATOM   | 48                                     | 3HG2 | ILE  | 3 | 5.855  | 0.397  | -3.053 | 1.00 | 0.00 |
| ATOM   | 49                                     | CG1  | ILE  | 3 | 5.328  | 1.194  | -0.225 | 1.00 | 0.00 |
| ATOM   | 50                                     | 2HG1 | ILE  | 3 | 4.371  | 1.510  | -0.641 | 1.00 | 0.00 |
| ATOM   | 51                                     | QG1  | ILE  | 3 | 4.371  | 1.510  | -0.641 | 1.00 | 0.00 |
| ATOM   | 52                                     | QD1  | ILE  | 3 | 5.145  | 0.880  | 1.633  | 1.00 | 0.00 |
| ATOM   | 53                                     | CD1  | ILE  | 3 | 5.180  | 0.940  | 1.276  | 1.00 | 0.00 |
| ATOM   | 54                                     | 1HD1 | ILE  | 3 | 4.123  | 0.950  | 1.544  | 1.00 | 0.00 |
| ATOM   | 55                                     | 2HD1 | ILE  | 3 | 5.609  | -0.031 | 1.525  | 1.00 | 0.00 |
| ATOM   | 56                                     | 3HD1 | ILE  | 3 | 5.702  | 1.720  | 1.831  | 1.00 | 0.00 |



|      |     |      |      |   |        |        |        |      |      |
|------|-----|------|------|---|--------|--------|--------|------|------|
| ATOM | 57  | C    | ILE  | 3 | 4.768  | -2.355 | -0.483 | 1.00 | 0.00 |
| ATOM | 58  | O    | ILE  | 3 | 5.250  | -3.375 | -0.996 | 1.00 | 0.00 |
| ATOM | 59  | N    | PIP  | 4 | 4.312  | -2.344 | 0.756  | 1.00 | 0.00 |
| ATOM | 60  | CE   | PIP  | 4 | 3.747  | -1.161 | 1.367  | 1.00 | 0.00 |
| ATOM | 61  | CA   | PIP  | 4 | 4.354  | -3.518 | 1.615  | 1.00 | 0.00 |
| ATOM | 62  | HA   | PIP  | 4 | 5.340  | -3.981 | 1.612  | 1.00 | 0.00 |
| ATOM | 63  | CB   | PIP  | 4 | 4.019  | -3.165 | 3.076  | 1.00 | 0.00 |
| ATOM | 64  | 2HB  | PIP  | 4 | 4.060  | -4.066 | 3.686  | 1.00 | 0.00 |
| ATOM | 65  | 3HB  | PIP  | 4 | 4.741  | -2.440 | 3.449  | 1.00 | 0.00 |
| ATOM | 66  | QB   | PIP  | 4 | 4.401  | -3.253 | 3.567  | 1.00 | 0.00 |
| ATOM | 67  | CG   | PIP  | 4 | 2.603  | -2.562 | 3.146  | 1.00 | 0.00 |
| ATOM | 68  | 2HG  | PIP  | 4 | 2.366  | -2.313 | 4.181  | 1.00 | 0.00 |
| ATOM | 69  | 3HG  | PIP  | 4 | 1.879  | -3.287 | 2.773  | 1.00 | 0.00 |
| ATOM | 70  | QG   | PIP  | 4 | 2.123  | -2.800 | 3.477  | 1.00 | 0.00 |
| ATOM | 71  | CD   | PIP  | 4 | 2.587  | -1.565 | 2.296  | 1.00 | 0.00 |
| ATOM | 72  | 2HD  | PIP  | 4 | 2.162  | -0.674 | 2.756  | 1.00 | 0.00 |
| ATOM | 73  | 3HD  | PIP  | 4 | 1.819  | -2.077 | 1.717  | 1.00 | 0.00 |
| ATOM | 74  | QD   | PIP  | 4 | 1.990  | -1.375 | 2.237  | 1.00 | 0.00 |
| ATOM | 75  | 1HE  | PIP  | 4 | 4.514  | -0.649 | 1.946  | 1.00 | 0.00 |
| ATOM | 76  | 2HE  | PIP  | 4 | 3.373  | -0.493 | 0.591  | 1.00 | 0.00 |
| ATOM | 77  | QE   | PIP  | 4 | 3.943  | -0.571 | 1.269  | 1.00 | 0.00 |
| ATOM | 78  | C    | PIP  | 4 | 3.346  | -4.589 | 1.162  | 1.00 | 0.00 |
| ATOM | 79  | O    | PIP  | 4 | 2.658  | -4.288 | 0.188  | 1.00 | 0.00 |
| ATOM | 80  | N    | ALA  | 5 | 3.270  | -5.743 | 1.807  | 1.00 | 0.00 |
| ATOM | 81  | H    | ALA  | 5 | 3.833  | -5.979 | 2.599  | 1.00 | 0.00 |
| ATOM | 82  | CA   | ALA  | 5 | 2.333  | -6.772 | 1.392  | 1.00 | 0.00 |
| ATOM | 83  | HA   | ALA  | 5 | 2.751  | -7.268 | 0.515  | 1.00 | 0.00 |
| ATOM | 84  | QB   | ALA  | 5 | 2.138  | -8.047 | 2.779  | 1.00 | 0.00 |
| ATOM | 85  | CB   | ALA  | 5 | 2.176  | -7.802 | 2.513  | 1.00 | 0.00 |
| ATOM | 86  | 1HB  | ALA  | 5 | 1.690  | -7.335 | 3.369  | 1.00 | 0.00 |
| ATOM | 87  | 2HB  | ALA  | 5 | 1.567  | -8.634 | 2.158  | 1.00 | 0.00 |
| ATOM | 88  | 3HB  | ALA  | 5 | 3.158  | -8.171 | 2.808  | 1.00 | 0.00 |
| ATOM | 89  | C    | ALA  | 5 | 1.003  | -6.120 | 1.009  | 1.00 | 0.00 |
| ATOM | 90  | O    | ALA  | 5 | 0.668  | -5.046 | 1.506  | 1.00 | 0.00 |
| ATOM | 91  | N    | PRO  | 6 | 0.263  | -6.814 | 0.104  | 1.00 | 0.00 |
| ATOM | 92  | CD   | PRO  | 6 | 0.628  | -8.088 | -0.508 | 1.00 | 0.00 |
| ATOM | 93  | CA   | PRO  | 6 | -1.023 | -6.314 | -0.352 | 1.00 | 0.00 |
| ATOM | 94  | HA   | PRO  | 6 | -0.974 | -5.330 | -0.520 | 1.00 | 0.00 |
| ATOM | 95  | CB   | PRO  | 6 | -1.317 | -7.088 | -1.627 | 1.00 | 0.00 |
| ATOM | 96  | 2HB  | PRO  | 6 | -1.112 | -6.482 | -2.508 | 1.00 | 0.00 |
| ATOM | 97  | QB   | PRO  | 6 | -1.112 | -6.482 | -2.508 | 1.00 | 0.00 |
| ATOM | 98  | CG   | PRO  | 6 | -0.418 | -8.314 | -1.587 | 1.00 | 0.00 |
| ATOM | 99  | 2HG  | PRO  | 6 | 0.060  | -8.468 | -2.554 | 1.00 | 0.00 |
| ATOM | 100 | QG   | PRO  | 6 | 0.060  | -8.468 | -2.554 | 1.00 | 0.00 |
| ATOM | 101 | 2HD  | PRO  | 6 | 1.632  | -8.052 | -0.930 | 1.00 | 0.00 |
| ATOM | 102 | QD   | PRO  | 6 | 1.632  | -8.052 | -0.930 | 1.00 | 0.00 |
| ATOM | 103 | C    | PRO  | 6 | -2.097 | -6.502 | 0.722  | 1.00 | 0.00 |
| ATOM | 104 | O    | PRO  | 6 | -2.482 | -7.614 | 1.103  | 1.00 | 0.00 |
| ATOM | 105 | N    | THRM | 7 | -2.589 | -5.383 | 1.220  | 1.00 | 0.00 |
| ATOM | 106 | QB   | THRM | 7 | -3.885 | -5.576 | 2.516  | 1.00 | 0.00 |
| ATOM | 107 | CN   | THRM | 7 | -3.629 | -5.538 | 2.260  | 1.00 | 0.00 |
| ATOM | 108 | 1HNB | THRM | 7 | -3.811 | -6.598 | 2.438  | 1.00 | 0.00 |
| ATOM | 109 | 2HNB | THRM | 7 | -3.292 | -5.068 | 3.185  | 1.00 | 0.00 |
| ATOM | 110 | 3HNB | THRM | 7 | -4.552 | -5.063 | 1.927  | 1.00 | 0.00 |
| ATOM | 111 | CA   | THRM | 7 | -2.135 | -4.070 | 0.770  | 1.00 | 0.00 |
| ATOM | 112 | HA   | THRM | 7 | -1.030 | -4.076 | 0.738  | 1.00 | 0.00 |
| ATOM | 113 | CB   | THRM | 7 | -2.677 | -3.763 | -0.667 | 1.00 | 0.00 |
| ATOM | 114 | HB   | THRM | 7 | -1.814 | -3.720 | -1.365 | 1.00 | 0.00 |
| ATOM | 115 | QG2  | THRM | 7 | -3.989 | -5.027 | -1.391 | 1.00 | 0.00 |

|      |     |      |      |    |        |        |        |      |      |
|------|-----|------|------|----|--------|--------|--------|------|------|
| ATOM | 116 | OG1  | THRM | 7  | -3.341 | -2.506 | -0.690 | 1.00 | 0.00 |
| ATOM | 117 | 1HG  | THRM | 7  | -3.602 | -2.358 | -1.604 | 1.00 | 0.00 |
| ATOM | 118 | CG2  | THRM | 7  | -3.712 | -4.757 | -1.235 | 1.00 | 0.00 |
| ATOM | 119 | 1HG2 | THRM | 7  | -3.874 | -4.616 | -2.319 | 1.00 | 0.00 |
| ATOM | 120 | 2HG2 | THRM | 7  | -3.397 | -5.811 | -1.114 | 1.00 | 0.00 |
| ATOM | 121 | 3HG2 | THRM | 7  | -4.696 | -4.653 | -0.740 | 1.00 | 0.00 |
| ATOM | 122 | C    | THRM | 7  | -2.552 | -2.991 | 1.740  | 1.00 | 0.00 |
| ATOM | 123 | O    | THRM | 7  | -3.357 | -3.257 | 2.631  | 1.00 | 0.00 |
| ATOM | 124 | N    | VAL  | 8  | -2.006 | -1.799 | 1.554  | 1.00 | 0.00 |
| ATOM | 125 | H    | VAL  | 8  | -1.351 | -1.592 | 0.826  | 1.00 | 0.00 |
| ATOM | 126 | CA   | VAL  | 8  | -2.330 | -0.682 | 2.425  | 1.00 | 0.00 |
| ATOM | 127 | HA   | VAL  | 8  | -3.338 | -0.844 | 2.805  | 1.00 | 0.00 |
| ATOM | 128 | CB   | VAL  | 8  | -1.373 | -0.653 | 3.618  | 1.00 | 0.00 |
| ATOM | 129 | HB   | VAL  | 8  | -1.156 | 0.391  | 3.848  | 1.00 | 0.00 |
| ATOM | 130 | QG1  | VAL  | 8  | -2.172 | -1.432 | 5.147  | 1.00 | 0.00 |
| ATOM | 131 | QG2  | VAL  | 8  | 0.263  | -1.508 | 3.197  | 1.00 | 0.00 |
| ATOM | 132 | CG1  | VAL  | 8  | -2.018 | -1.282 | 4.854  | 1.00 | 0.00 |
| ATOM | 133 | 1HG1 | VAL  | 8  | -2.082 | -0.539 | 5.648  | 1.00 | 0.00 |
| ATOM | 134 | 2HG1 | VAL  | 8  | -3.019 | -1.632 | 4.603  | 1.00 | 0.00 |
| ATOM | 135 | 3HG1 | VAL  | 8  | -1.413 | -2.124 | 5.191  | 1.00 | 0.00 |
| ATOM | 136 | CG2  | VAL  | 8  | -0.051 | -1.344 | 3.277  | 1.00 | 0.00 |
| ATOM | 137 | 1HG2 | VAL  | 8  | 0.277  | -1.032 | 2.286  | 1.00 | 0.00 |
| ATOM | 138 | 2HG2 | VAL  | 8  | 0.704  | -1.068 | 4.015  | 1.00 | 0.00 |
| ATOM | 139 | 3HG2 | VAL  | 8  | -0.193 | -2.425 | 3.289  | 1.00 | 0.00 |
| ATOM | 140 | QQG  | VAL  | 8  | -0.954 | -1.470 | 4.172  | 1.00 | 0.00 |
| ATOM | 141 | C    | VAL  | 8  | -2.312 | 0.614  | 1.612  | 1.00 | 0.00 |
| ATOM | 142 | O    | VAL  | 8  | -1.920 | 0.669  | 0.441  | 1.00 | 0.00 |
| ATOM | 143 | N    | THRM | 9  | -2.749 | 1.682  | 2.255  | 1.00 | 0.00 |
| ATOM | 144 | QB   | THRM | 9  | -3.292 | 1.411  | 3.996  | 1.00 | 0.00 |
| ATOM | 145 | CN   | THRM | 9  | -3.185 | 1.464  | 3.652  | 1.00 | 0.00 |
| ATOM | 146 | 1HNB | THRM | 9  | -3.062 | 0.412  | 3.912  | 1.00 | 0.00 |
| ATOM | 147 | 2HNB | THRM | 9  | -2.580 | 2.077  | 4.322  | 1.00 | 0.00 |
| ATOM | 148 | 3HNB | THRM | 9  | -4.234 | 1.743  | 3.753  | 1.00 | 0.00 |
| ATOM | 149 | CA   | THRM | 9  | -2.798 | 2.998  | 1.625  | 1.00 | 0.00 |
| ATOM | 150 | HA   | THRM | 9  | -2.514 | 2.886  | 0.562  | 1.00 | 0.00 |
| ATOM | 151 | CB   | THRM | 9  | -4.246 | 3.589  | 1.700  | 1.00 | 0.00 |
| ATOM | 152 | HB   | THRM | 9  | -4.253 | 4.563  | 1.165  | 1.00 | 0.00 |
| ATOM | 153 | QG2  | THRM | 9  | -5.683 | 2.475  | 0.968  | 1.00 | 0.00 |
| ATOM | 154 | OG1  | THRM | 9  | -4.624 | 3.811  | 3.052  | 1.00 | 0.00 |
| ATOM | 155 | 1HG  | THRM | 9  | -4.436 | 4.737  | 3.234  | 1.00 | 0.00 |
| ATOM | 156 | CG2  | THRM | 9  | -5.376 | 2.710  | 1.122  | 1.00 | 0.00 |
| ATOM | 157 | 1HG2 | THRM | 9  | -6.100 | 2.402  | 1.896  | 1.00 | 0.00 |
| ATOM | 158 | 2HG2 | THRM | 9  | -5.967 | 3.236  | 0.350  | 1.00 | 0.00 |
| ATOM | 159 | 3HG2 | THRM | 9  | -4.981 | 1.788  | 0.657  | 1.00 | 0.00 |
| ATOM | 160 | C    | THRM | 9  | -1.803 | 3.939  | 2.260  | 1.00 | 0.00 |
| ATOM | 161 | O    | THRM | 9  | -2.152 | 4.869  | 2.959  | 1.00 | 0.00 |
| ATOM | 162 | N    | VALM | 10 | -0.531 | 3.691  | 2.011  | 1.00 | 0.00 |
| ATOM | 163 | QB   | VALM | 10 | -0.187 | 2.237  | 0.930  | 1.00 | 0.00 |
| ATOM | 164 | CN   | VALM | 10 | -0.255 | 2.524  | 1.144  | 1.00 | 0.00 |
| ATOM | 165 | 1HNB | VALM | 10 | -0.440 | 1.605  | 1.700  | 1.00 | 0.00 |
| ATOM | 166 | 2HNB | VALM | 10 | -0.906 | 2.557  | 0.271  | 1.00 | 0.00 |
| ATOM | 167 | 3HNB | VALM | 10 | 0.786  | 2.549  | 0.820  | 1.00 | 0.00 |
| ATOM | 168 | CA   | VALM | 10 | 0.541  | 4.518  | 2.559  | 1.00 | 0.00 |
| ATOM | 169 | HA   | VALM | 10 | 0.188  | 5.564  | 2.619  | 1.00 | 0.00 |
| ATOM | 170 | CB   | VALM | 10 | 0.923  | 4.011  | 4.006  | 1.00 | 0.00 |
| ATOM | 171 | HB   | VALM | 10 | 1.835  | 3.386  | 3.904  | 1.00 | 0.00 |
| ATOM | 172 | QG1  | VALM | 10 | 1.356  | 5.407  | 5.336  | 1.00 | 0.00 |
| ATOM | 173 | QG2  | VALM | 10 | -0.448 | 2.887  | 4.845  | 1.00 | 0.00 |
| ATOM | 174 | CG1  | VALM | 10 | 1.256  | 5.108  | 5.055  | 1.00 | 0.00 |

|      |     |      |      |    |        |       |        |      |      |
|------|-----|------|------|----|--------|-------|--------|------|------|
| ATOM | 175 | 1HG1 | VALM | 10 | 0.398  | 5.338 | 5.713  | 1.00 | 0.00 |
| ATOM | 176 | 2HG1 | VALM | 10 | 2.102  | 4.822 | 5.708  | 1.00 | 0.00 |
| ATOM | 177 | 3HG1 | VALM | 10 | 1.570  | 6.060 | 4.586  | 1.00 | 0.00 |
| ATOM | 178 | CG2  | VALM | 10 | -0.162 | 3.129 | 4.669  | 1.00 | 0.00 |
| ATOM | 179 | 1HG2 | VALM | 10 | -1.055 | 3.711 | 4.963  | 1.00 | 0.00 |
| ATOM | 180 | 2HG2 | VALM | 10 | -0.506 | 2.324 | 3.994  | 1.00 | 0.00 |
| ATOM | 181 | 3HG2 | VALM | 10 | 0.217  | 2.625 | 5.578  | 1.00 | 0.00 |
| ATOM | 182 | QOG  | VALM | 10 | 0.454  | 4.147 | 5.090  | 1.00 | 0.00 |
| ATOM | 183 | C    | VALM | 10 | 1.747  | 4.511 | 1.651  | 1.00 | 0.00 |
| ATOM | 184 | O    | VALM | 10 | 2.835  | 4.043 | 2.010  | 1.00 | 0.00 |
| ATOM | 185 | N    | ILEM | 11 | 1.572  | 5.033 | 0.452  | 1.00 | 0.00 |
| ATOM | 186 | QB   | ILEM | 11 | -0.116 | 5.681 | 0.091  | 1.00 | 0.00 |
| ATOM | 187 | CN   | ILEM | 11 | 0.217  | 5.554 | 0.162  | 1.00 | 0.00 |
| ATOM | 188 | 1HNB | ILEM | 11 | -0.423 | 5.405 | 1.032  | 1.00 | 0.00 |
| ATOM | 189 | 2HNB | ILEM | 11 | 0.277  | 6.618 | -0.067 | 1.00 | 0.00 |
| ATOM | 190 | 3HNB | ILEM | 11 | -0.202 | 5.021 | -0.691 | 1.00 | 0.00 |
| ATOM | 191 | CA   | ILEM | 11 | 2.650  | 5.094 | -0.531 | 1.00 | 0.00 |
| ATOM | 192 | HA   | ILEM | 11 | 2.265  | 5.632 | -1.417 | 1.00 | 0.00 |
| ATOM | 193 | CB   | ILEM | 11 | 3.898  | 5.890 | 0.031  | 1.00 | 0.00 |
| ATOM | 194 | HB   | ILEM | 11 | 3.696  | 6.077 | 1.107  | 1.00 | 0.00 |
| ATOM | 195 | QG2  | ILEM | 11 | 5.584  | 4.850 | -0.086 | 1.00 | 0.00 |
| ATOM | 196 | CG2  | ILEM | 11 | 5.226  | 5.078 | -0.065 | 1.00 | 0.00 |
| ATOM | 197 | 1HG2 | ILEM | 11 | 5.349  | 4.369 | 0.774  | 1.00 | 0.00 |
| ATOM | 198 | 2HG2 | ILEM | 11 | 5.286  | 4.445 | -0.968 | 1.00 | 0.00 |
| ATOM | 199 | 3HG2 | ILEM | 11 | 6.117  | 5.734 | -0.065 | 1.00 | 0.00 |
| ATOM | 200 | CG1  | ILEM | 11 | 4.133  | 7.285 | -0.631 | 1.00 | 0.00 |
| ATOM | 201 | 2HG1 | ILEM | 11 | 3.883  | 7.230 | -1.708 | 1.00 | 0.00 |
| ATOM | 202 | QG1  | ILEM | 11 | 3.883  | 7.230 | -1.708 | 1.00 | 0.00 |
| ATOM | 203 | QD1  | ILEM | 11 | 3.069  | 8.756 | 0.091  | 1.00 | 0.00 |
| ATOM | 204 | CD1  | ILEM | 11 | 3.298  | 8.450 | -0.063 | 1.00 | 0.00 |
| ATOM | 205 | 1HD1 | ILEM | 11 | 2.291  | 8.108 | 0.242  | 1.00 | 0.00 |
| ATOM | 206 | 2HD1 | ILEM | 11 | 3.772  | 8.899 | 0.829  | 1.00 | 0.00 |
| ATOM | 207 | 3HD1 | ILEM | 11 | 3.145  | 9.260 | -0.799 | 1.00 | 0.00 |
| ATOM | 208 | C    | ILEM | 11 | 3.032  | 3.711 | -1.002 | 1.00 | 0.00 |
| ATOM | 209 | O    | ILEM | 11 | 2.757  | 2.695 | -0.347 | 1.00 | 0.00 |
| ATOM | 210 | N    | PIPO | 12 | 3.676  | 3.649 | -2.152 | 1.00 | 0.00 |
| ATOM | 211 | CE   | PIPO | 12 | 4.109  | 2.398 | -2.735 | 1.00 | 0.00 |
| ATOM | 212 | CA   | PIPO | 12 | 4.019  | 4.835 | -2.922 | 1.00 | 0.00 |
| ATOM | 213 | HA   | PIPO | 12 | 4.494  | 5.594 | -2.299 | 1.00 | 0.00 |
| ATOM | 214 | CB   | PIPO | 12 | 4.996  | 4.508 | -4.066 | 1.00 | 0.00 |
| ATOM | 215 | 2HB  | PIPO | 12 | 5.229  | 5.418 | -4.618 | 1.00 | 0.00 |
| ATOM | 216 | 3HB  | PIPO | 12 | 5.914  | 4.089 | -3.652 | 1.00 | 0.00 |
| ATOM | 217 | QB   | PIPO | 12 | 5.572  | 4.753 | -4.135 | 1.00 | 0.00 |
| ATOM | 218 | CG   | PIPO | 12 | 4.349  | 3.483 | -5.016 | 1.00 | 0.00 |
| ATOM | 219 | 2HG  | PIPO | 12 | 5.041  | 3.251 | -5.826 | 1.00 | 0.00 |
| ATOM | 220 | 3HG  | PIPO | 12 | 3.432  | 3.900 | -5.432 | 1.00 | 0.00 |
| ATOM | 221 | QG   | PIPO | 12 | 4.236  | 3.576 | -5.629 | 1.00 | 0.00 |
| ATOM | 222 | CD   | PIPO | 12 | 3.981  | 2.473 | -4.267 | 1.00 | 0.00 |
| ATOM | 223 | 2HD  | PIPO | 12 | 4.306  | 1.529 | -4.707 | 1.00 | 0.00 |
| ATOM | 224 | 3HD  | PIPO | 12 | 2.941  | 2.658 | -4.538 | 1.00 | 0.00 |
| ATOM | 225 | QD   | PIPO | 12 | 3.624  | 2.093 | -4.622 | 1.00 | 0.00 |
| ATOM | 226 | 1HE  | PIPO | 12 | 5.148  | 2.211 | -2.467 | 1.00 | 0.00 |
| ATOM | 227 | 2HE  | PIPO | 12 | 3.486  | 1.586 | -2.358 | 1.00 | 0.00 |
| ATOM | 228 | QE   | PIPO | 12 | 4.317  | 1.899 | -2.413 | 1.00 | 0.00 |
| ATOM | 229 | C    | PIPO | 12 | 2.775  | 5.479 | -3.555 | 1.00 | 0.00 |
| ATOM | 230 | O    | PIPO | 12 | 2.616  | 6.698 | -3.412 | 1.00 | 0.00 |
| ATOM | 231 | O1'  | PHEO | 13 | 1.921  | 4.738 | -4.236 | 1.00 | 0.00 |
| ATOM | 232 | CA   | PHEO | 13 | 0.525  | 5.128 | -4.409 | 1.00 | 0.00 |
| ATOM | 233 | HA   | PHEO | 13 | 0.462  | 6.048 | -5.021 | 1.00 | 0.00 |

|               |     |      |      |    |        |        |        |      |      |
|---------------|-----|------|------|----|--------|--------|--------|------|------|
| ATOM          | 234 | CB   | PHEO | 13 | -0.109 | 5.376  | -3.008 | 1.00 | 0.00 |
| ATOM          | 235 | 2HB  | PHEO | 13 | 0.674  | 5.732  | -2.308 | 1.00 | 0.00 |
| ATOM          | 236 | QB   | PHEO | 13 | 0.674  | 5.732  | -2.308 | 1.00 | 0.00 |
| ATOM          | 237 | QD   | PHEO | 13 | -1.419 | 6.465  | -2.919 | 1.00 | 0.00 |
| ATOM          | 238 | QE   | PHEO | 13 | -3.297 | 8.043  | -2.709 | 1.00 | 0.00 |
| ATOM          | 239 | QR   | PHEO | 13 | -2.735 | 7.571  | -2.772 | 1.00 | 0.00 |
| ATOM          | 240 | CG   | PHEO | 13 | -1.289 | 6.358  | -2.955 | 1.00 | 0.00 |
| ATOM          | 241 | CD1  | PHEO | 13 | -1.048 | 7.718  | -2.730 | 1.00 | 0.00 |
| ATOM          | 242 | 1HD  | PHEO | 13 | -0.034 | 8.078  | -2.613 | 1.00 | 0.00 |
| ATOM          | 243 | CE1  | PHEO | 13 | -2.109 | 8.607  | -2.600 | 1.00 | 0.00 |
| ATOM          | 244 | 1HE  | PHEO | 13 | -1.912 | 9.651  | -2.396 | 1.00 | 0.00 |
| ATOM          | 245 | CZ   | PHEO | 13 | -3.419 | 8.146  | -2.709 | 1.00 | 0.00 |
| ATOM          | 246 | HZ   | PHEO | 13 | -4.241 | 8.837  | -2.602 | 1.00 | 0.00 |
| ATOM          | 247 | CE2  | PHEO | 13 | -3.667 | 6.794  | -2.944 | 1.00 | 0.00 |
| ATOM          | 248 | 2HE  | PHEO | 13 | -4.683 | 6.436  | -3.022 | 1.00 | 0.00 |
| ATOM          | 249 | CD2  | PHEO | 13 | -2.605 | 5.902  | -3.064 | 1.00 | 0.00 |
| ATOM          | 250 | 2HD  | PHEO | 13 | -2.804 | 4.852  | -3.226 | 1.00 | 0.00 |
| ATOM          | 251 | C    | PHEO | 13 | -0.262 | 4.035  | -5.092 | 1.00 | 0.00 |
| ATOM          | 252 | O    | PHEO | 13 | -1.372 | 4.258  | -5.652 | 1.00 | 0.00 |
| <u>TER</u>    |     |      |      |    |        |        |        |      |      |
| <u>ENDMDL</u> |     |      |      |    |        |        |        |      |      |
| <u>MODEL</u>  |     |      |      |    |        |        |        |      |      |
|               | 2   |      |      |    |        |        |        |      |      |
| ATOM          | 1   | N    | VALM | 1  | 0.148  | 3.197  | -5.088 | 1.00 | 0.00 |
| ATOM          | 2   | QB   | VALM | 1  | 1.299  | 2.989  | -6.513 | 1.00 | 0.00 |
| ATOM          | 3   | CN   | VALM | 1  | 1.072  | 3.030  | -6.232 | 1.00 | 0.00 |
| ATOM          | 4   | 1HNB | VALM | 1  | 0.924  | 2.046  | -6.678 | 1.00 | 0.00 |
| ATOM          | 5   | 2HNB | VALM | 1  | 0.871  | 3.800  | -6.976 | 1.00 | 0.00 |
| ATOM          | 6   | 3HNB | VALM | 1  | 2.101  | 3.120  | -5.885 | 1.00 | 0.00 |
| ATOM          | 7   | CA   | VALM | 1  | -0.327 | 2.059  | -4.305 | 1.00 | 0.00 |
| ATOM          | 8   | HA   | VALM | 1  | -1.301 | 2.320  | -3.852 | 1.00 | 0.00 |
| ATOM          | 9   | CB   | VALM | 1  | -0.507 | 0.801  | -5.244 | 1.00 | 0.00 |
| ATOM          | 10  | HB   | VALM | 1  | -1.359 | 0.212  | -4.842 | 1.00 | 0.00 |
| ATOM          | 11  | QG1  | VALM | 1  | -0.939 | 1.174  | -7.136 | 1.00 | 0.00 |
| ATOM          | 12  | QG2  | VALM | 1  | 1.050  | -0.392 | -5.278 | 1.00 | 0.00 |
| ATOM          | 13  | CG1  | VALM | 1  | -0.839 | 1.094  | -6.734 | 1.00 | 0.00 |
| ATOM          | 14  | 1HG1 | VALM | 1  | 0.053  | 1.030  | -7.386 | 1.00 | 0.00 |
| ATOM          | 15  | 2HG1 | VALM | 1  | -1.593 | 0.393  | -7.142 | 1.00 | 0.00 |
| ATOM          | 16  | 3HG1 | VALM | 1  | -1.278 | 2.099  | -6.879 | 1.00 | 0.00 |
| ATOM          | 17  | CG2  | VALM | 1  | 0.722  | -0.139 | -5.276 | 1.00 | 0.00 |
| ATOM          | 18  | 1HG2 | VALM | 1  | 1.132  | -0.258 | -6.296 | 1.00 | 0.00 |
| ATOM          | 19  | 2HG2 | VALM | 1  | 1.542  | 0.234  | -4.637 | 1.00 | 0.00 |
| ATOM          | 20  | 3HG2 | VALM | 1  | 0.476  | -1.151 | -4.899 | 1.00 | 0.00 |
| ATOM          | 21  | QQG  | VALM | 1  | 0.055  | 0.391  | -6.207 | 1.00 | 0.00 |
| ATOM          | 22  | C    | VALM | 1  | 0.619  | 1.751  | -3.169 | 1.00 | 0.00 |
| ATOM          | 23  | O    | VALM | 1  | 1.617  | 2.451  | -3.005 | 1.00 | 0.00 |
| ATOM          | 24  | N    | PRO  | 2  | 0.287  | 0.688  | -2.389 | 1.00 | 0.00 |
| ATOM          | 25  | CD   | PRO  | 2  | -0.887 | -0.163 | -2.553 | 1.00 | 0.00 |
| ATOM          | 26  | CA   | PRO  | 2  | 1.120  | 0.295  | -1.266 | 1.00 | 0.00 |
| ATOM          | 27  | HA   | PRO  | 2  | 1.430  | 1.103  | -0.763 | 1.00 | 0.00 |
| ATOM          | 28  | CB   | PRO  | 2  | 0.233  | -0.595 | -0.409 | 1.00 | 0.00 |
| ATOM          | 29  | 2HB  | PRO  | 2  | -0.147 | -0.051 | 0.456  | 1.00 | 0.00 |
| ATOM          | 30  | QB   | PRO  | 2  | -0.147 | -0.051 | 0.456  | 1.00 | 0.00 |
| ATOM          | 31  | CG   | PRO  | 2  | -0.904 | -1.043 | -1.313 | 1.00 | 0.00 |
| ATOM          | 32  | 2HG  | PRO  | 2  | -1.859 | -0.956 | -0.796 | 1.00 | 0.00 |
| ATOM          | 33  | QG   | PRO  | 2  | -1.859 | -0.956 | -0.796 | 1.00 | 0.00 |
| ATOM          | 34  | 2HD  | PRO  | 2  | -1.799 | 0.429  | -2.631 | 1.00 | 0.00 |
| ATOM          | 35  | QD   | PRO  | 2  | -1.799 | 0.429  | -2.631 | 1.00 | 0.00 |
| ATOM          | 36  | C    | PRO  | 2  | 2.390  | -0.411 | -1.745 | 1.00 | 0.00 |
| ATOM          | 37  | O    | PRO  | 2  | 2.422  | -0.957 | -2.846 | 1.00 | 0.00 |

Supplementary Material for Organic & Biomolecular Chemistry  
 This journal is © The Royal Society of Chemistry 2006

|      |    |      |     |   |        |        |        |      |      |
|------|----|------|-----|---|--------|--------|--------|------|------|
| ATOM | 38 | N    | ILE | 3 | 3.405  | -0.377 | -0.895 | 1.00 | 0.00 |
| ATOM | 39 | H    | ILE | 3 | 3.371  | 0.069  | 0.000  | 1.00 | 0.00 |
| ATOM | 40 | CA   | ILE | 3 | 4.673  | -1.007 | -1.218 | 1.00 | 0.00 |
| ATOM | 41 | HA   | ILE | 3 | 4.675  | -1.207 | -2.289 | 1.00 | 0.00 |
| ATOM | 42 | CB   | ILE | 3 | 5.834  | -0.051 | -0.934 | 1.00 | 0.00 |
| ATOM | 43 | HB   | ILE | 3 | 6.536  | -0.554 | -0.269 | 1.00 | 0.00 |
| ATOM | 44 | QG2  | ILE | 3 | 6.772  | 0.368  | -2.524 | 1.00 | 0.00 |
| ATOM | 45 | CG2  | ILE | 3 | 6.592  | 0.288  | -2.219 | 1.00 | 0.00 |
| ATOM | 46 | 1HG2 | ILE | 3 | 7.296  | -0.513 | -2.447 | 1.00 | 0.00 |
| ATOM | 47 | 2HG2 | ILE | 3 | 5.884  | 0.395  | -3.041 | 1.00 | 0.00 |
| ATOM | 48 | 3HG2 | ILE | 3 | 7.137  | 1.223  | -2.084 | 1.00 | 0.00 |
| ATOM | 49 | CG1  | ILE | 3 | 5.345  | 1.204  | -0.209 | 1.00 | 0.00 |
| ATOM | 50 | 2HG1 | ILE | 3 | 4.393  | 1.524  | -0.630 | 1.00 | 0.00 |
| ATOM | 51 | QG1  | ILE | 3 | 4.393  | 1.524  | -0.630 | 1.00 | 0.00 |
| ATOM | 52 | QD1  | ILE | 3 | 5.148  | 0.884  | 1.646  | 1.00 | 0.00 |
| ATOM | 53 | CD1  | ILE | 3 | 5.186  | 0.946  | 1.290  | 1.00 | 0.00 |
| ATOM | 54 | 1HD1 | ILE | 3 | 5.712  | 1.719  | 1.850  | 1.00 | 0.00 |
| ATOM | 55 | 2HD1 | ILE | 3 | 4.129  | 0.963  | 1.552  | 1.00 | 0.00 |
| ATOM | 56 | 3HD1 | ILE | 3 | 5.605  | -0.031 | 1.536  | 1.00 | 0.00 |
| ATOM | 57 | C    | ILE | 3 | 4.780  | -2.340 | -0.475 | 1.00 | 0.00 |
| ATOM | 58 | O    | ILE | 3 | 5.267  | -3.361 | -0.986 | 1.00 | 0.00 |
| ATOM | 59 | N    | PIP | 4 | 4.313  | -2.331 | 0.759  | 1.00 | 0.00 |
| ATOM | 60 | CE   | PIP | 4 | 3.742  | -1.147 | 1.366  | 1.00 | 0.00 |
| ATOM | 61 | CA   | PIP | 4 | 4.347  | -3.504 | 1.618  | 1.00 | 0.00 |
| ATOM | 62 | HA   | PIP | 4 | 5.334  | -3.968 | 1.624  | 1.00 | 0.00 |
| ATOM | 63 | CB   | PIP | 4 | 4.000  | -3.152 | 3.075  | 1.00 | 0.00 |
| ATOM | 64 | 2HB  | PIP | 4 | 4.035  | -4.054 | 3.687  | 1.00 | 0.00 |
| ATOM | 65 | 3HB  | PIP | 4 | 4.718  | -2.426 | 3.456  | 1.00 | 0.00 |
| ATOM | 66 | QB   | PIP | 4 | 4.377  | -3.240 | 3.572  | 1.00 | 0.00 |
| ATOM | 67 | CG   | PIP | 4 | 2.583  | -2.550 | 3.134  | 1.00 | 0.00 |
| ATOM | 68 | 2HG  | PIP | 4 | 2.337  | -2.300 | 4.167  | 1.00 | 0.00 |
| ATOM | 69 | 3HG  | PIP | 4 | 1.863  | -3.275 | 2.755  | 1.00 | 0.00 |
| ATOM | 70 | QG   | PIP | 4 | 2.100  | -2.788 | 3.461  | 1.00 | 0.00 |
| ATOM | 71 | CD   | PIP | 4 | 2.575  | -1.553 | 2.284  | 1.00 | 0.00 |
| ATOM | 72 | 2HD  | PIP | 4 | 2.146  | -0.661 | 2.742  | 1.00 | 0.00 |
| ATOM | 73 | 3HD  | PIP | 4 | 1.812  | -2.064 | 1.699  | 1.00 | 0.00 |
| ATOM | 74 | QD   | PIP | 4 | 1.979  | -1.363 | 2.220  | 1.00 | 0.00 |
| ATOM | 75 | 1HE  | PIP | 4 | 4.505  | -0.635 | 1.952  | 1.00 | 0.00 |
| ATOM | 76 | 2HE  | PIP | 4 | 3.376  | -0.480 | 0.585  | 1.00 | 0.00 |
| ATOM | 77 | QE   | PIP | 4 | 3.940  | -0.558 | 1.269  | 1.00 | 0.00 |
| ATOM | 78 | C    | PIP | 4 | 3.345  | -4.575 | 1.156  | 1.00 | 0.00 |
| ATOM | 79 | O    | PIP | 4 | 2.676  | -4.280 | 0.167  | 1.00 | 0.00 |
| ATOM | 80 | N    | ALA | 5 | 3.253  | -5.723 | 1.809  | 1.00 | 0.00 |
| ATOM | 81 | H    | ALA | 5 | 3.800  | -5.955 | 2.613  | 1.00 | 0.00 |
| ATOM | 82 | CA   | ALA | 5 | 2.319  | -6.753 | 1.386  | 1.00 | 0.00 |
| ATOM | 83 | HA   | ALA | 5 | 2.742  | -7.244 | 0.509  | 1.00 | 0.00 |
| ATOM | 84 | QB   | ALA | 5 | 2.120  | -8.033 | 2.766  | 1.00 | 0.00 |
| ATOM | 85 | CB   | ALA | 5 | 2.158  | -7.788 | 2.501  | 1.00 | 0.00 |
| ATOM | 86 | 1HB  | ALA | 5 | 1.913  | -7.281 | 3.435  | 1.00 | 0.00 |
| ATOM | 87 | 2HB  | ALA | 5 | 1.356  | -8.479 | 2.243  | 1.00 | 0.00 |
| ATOM | 88 | 3HB  | ALA | 5 | 3.090  | -8.340 | 2.621  | 1.00 | 0.00 |
| ATOM | 89 | C    | ALA | 5 | 0.989  | -6.101 | 0.999  | 1.00 | 0.00 |
| ATOM | 90 | O    | ALA | 5 | 0.649  | -5.032 | 1.501  | 1.00 | 0.00 |
| ATOM | 91 | N    | PRO | 6 | 0.255  | -6.792 | 0.085  | 1.00 | 0.00 |
| ATOM | 92 | CD   | PRO | 6 | 0.628  | -8.062 | -0.531 | 1.00 | 0.00 |
| ATOM | 93 | CA   | PRO | 6 | -1.028 | -6.292 | -0.375 | 1.00 | 0.00 |
| ATOM | 94 | HA   | PRO | 6 | -0.980 | -5.307 | -0.536 | 1.00 | 0.00 |
| ATOM | 95 | CB   | PRO | 6 | -1.314 | -7.059 | -1.656 | 1.00 | 0.00 |
| ATOM | 96 | 2HB  | PRO | 6 | -1.105 | -6.445 | -2.533 | 1.00 | 0.00 |

|      |     |      |      |   |        |        |        |      |      |
|------|-----|------|------|---|--------|--------|--------|------|------|
| ATOM | 97  | QB   | PRO  | 6 | -1.105 | -6.445 | -2.533 | 1.00 | 0.00 |
| ATOM | 98  | CG   | PRO  | 6 | -0.412 | -8.282 | -1.619 | 1.00 | 0.00 |
| ATOM | 99  | 2HG  | PRO  | 6 | 0.073  | -8.429 | -2.585 | 1.00 | 0.00 |
| ATOM | 100 | QG   | PRO  | 6 | 0.073  | -8.429 | -2.585 | 1.00 | 0.00 |
| ATOM | 101 | 2HD  | PRO  | 6 | 1.635  | -8.020 | -0.949 | 1.00 | 0.00 |
| ATOM | 102 | QD   | PRO  | 6 | 1.635  | -8.020 | -0.949 | 1.00 | 0.00 |
| ATOM | 103 | C    | PRO  | 6 | -2.108 | -6.489 | 0.692  | 1.00 | 0.00 |
| ATOM | 104 | O    | PRO  | 6 | -2.494 | -7.605 | 1.062  | 1.00 | 0.00 |
| ATOM | 105 | N    | THRM | 7 | -2.605 | -5.374 | 1.195  | 1.00 | 0.00 |
| ATOM | 106 | QB   | THRM | 7 | -3.907 | -5.579 | 2.483  | 1.00 | 0.00 |
| ATOM | 107 | CN   | THRM | 7 | -3.650 | -5.539 | 2.230  | 1.00 | 0.00 |
| ATOM | 108 | 1HNB | THRM | 7 | -3.831 | -6.600 | 2.398  | 1.00 | 0.00 |
| ATOM | 109 | 2HNB | THRM | 7 | -3.319 | -5.075 | 3.158  | 1.00 | 0.00 |
| ATOM | 110 | 3HNB | THRM | 7 | -4.572 | -5.063 | 1.894  | 1.00 | 0.00 |
| ATOM | 111 | CA   | THRM | 7 | -2.149 | -4.057 | 0.758  | 1.00 | 0.00 |
| ATOM | 112 | HA   | THRM | 7 | -1.044 | -4.065 | 0.722  | 1.00 | 0.00 |
| ATOM | 113 | CB   | THRM | 7 | -2.696 | -3.735 | -0.674 | 1.00 | 0.00 |
| ATOM | 114 | HB   | THRM | 7 | -1.835 | -3.685 | -1.373 | 1.00 | 0.00 |
| ATOM | 115 | QG2  | THRM | 7 | -4.016 | -4.986 | -1.406 | 1.00 | 0.00 |
| ATOM | 116 | OG1  | THRM | 7 | -3.360 | -2.477 | -0.681 | 1.00 | 0.00 |
| ATOM | 117 | 1HG  | THRM | 7 | -3.515 | -2.262 | -1.606 | 1.00 | 0.00 |
| ATOM | 118 | CG2  | THRM | 7 | -3.734 | -4.723 | -1.250 | 1.00 | 0.00 |
| ATOM | 119 | 1HG2 | THRM | 7 | -4.714 | -4.636 | -0.748 | 1.00 | 0.00 |
| ATOM | 120 | 2HG2 | THRM | 7 | -3.932 | -4.550 | -2.324 | 1.00 | 0.00 |
| ATOM | 121 | 3HG2 | THRM | 7 | -3.402 | -5.773 | -1.145 | 1.00 | 0.00 |
| ATOM | 122 | C    | THRM | 7 | -2.563 | -2.989 | 1.740  | 1.00 | 0.00 |
| ATOM | 123 | O    | THRM | 7 | -3.362 | -3.263 | 2.634  | 1.00 | 0.00 |
| ATOM | 124 | N    | VAL  | 8 | -2.017 | -1.795 | 1.563  | 1.00 | 0.00 |
| ATOM | 125 | H    | VAL  | 8 | -1.366 | -1.579 | 0.834  | 1.00 | 0.00 |
| ATOM | 126 | CA   | VAL  | 8 | -2.337 | -0.686 | 2.447  | 1.00 | 0.00 |
| ATOM | 127 | HA   | VAL  | 8 | -3.343 | -0.852 | 2.832  | 1.00 | 0.00 |
| ATOM | 128 | CB   | VAL  | 8 | -1.373 | -0.668 | 3.635  | 1.00 | 0.00 |
| ATOM | 129 | HB   | VAL  | 8 | -1.149 | 0.374  | 3.868  | 1.00 | 0.00 |
| ATOM | 130 | QG1  | VAL  | 8 | -2.167 | -1.450 | 5.165  | 1.00 | 0.00 |
| ATOM | 131 | QG2  | VAL  | 8 | 0.256  | -1.530 | 3.200  | 1.00 | 0.00 |
| ATOM | 132 | CG1  | VAL  | 8 | -2.015 | -1.299 | 4.871  | 1.00 | 0.00 |
| ATOM | 133 | 1HG1 | VAL  | 8 | -1.423 | -2.158 | 5.190  | 1.00 | 0.00 |
| ATOM | 134 | 2HG1 | VAL  | 8 | -2.053 | -0.566 | 5.676  | 1.00 | 0.00 |
| ATOM | 135 | 3HG1 | VAL  | 8 | -3.026 | -1.625 | 4.629  | 1.00 | 0.00 |
| ATOM | 136 | CG2  | VAL  | 8 | -0.057 | -1.365 | 3.283  | 1.00 | 0.00 |
| ATOM | 137 | 1HG2 | VAL  | 8 | 0.265  | -1.054 | 2.289  | 1.00 | 0.00 |
| ATOM | 138 | 2HG2 | VAL  | 8 | 0.705  | -1.091 | 4.013  | 1.00 | 0.00 |
| ATOM | 139 | 3HG2 | VAL  | 8 | -0.203 | -2.445 | 3.298  | 1.00 | 0.00 |
| ATOM | 140 | QQG  | VAL  | 8 | -0.956 | -1.490 | 4.183  | 1.00 | 0.00 |
| ATOM | 141 | C    | VAL  | 8 | -2.325 | 0.617  | 1.647  | 1.00 | 0.00 |
| ATOM | 142 | O    | VAL  | 8 | -1.948 | 0.683  | 0.470  | 1.00 | 0.00 |
| ATOM | 143 | N    | THRM | 9 | -2.747 | 1.681  | 2.305  | 1.00 | 0.00 |
| ATOM | 144 | QB   | THRM | 9 | -3.269 | 1.395  | 4.051  | 1.00 | 0.00 |
| ATOM | 145 | CN   | THRM | 9 | -3.166 | 1.451  | 3.706  | 1.00 | 0.00 |
| ATOM | 146 | 1HNB | THRM | 9 | -3.044 | 0.396  | 3.955  | 1.00 | 0.00 |
| ATOM | 147 | 2HNB | THRM | 9 | -2.551 | 2.055  | 4.374  | 1.00 | 0.00 |
| ATOM | 148 | 3HNB | THRM | 9 | -4.213 | 1.733  | 3.824  | 1.00 | 0.00 |
| ATOM | 149 | CA   | THRM | 9 | -2.800 | 3.003  | 1.689  | 1.00 | 0.00 |
| ATOM | 150 | HA   | THRM | 9 | -2.538 | 2.899  | 0.620  | 1.00 | 0.00 |
| ATOM | 151 | CB   | THRM | 9 | -4.241 | 3.604  | 1.798  | 1.00 | 0.00 |
| ATOM | 152 | HB   | THRM | 9 | -4.247 | 4.593  | 1.291  | 1.00 | 0.00 |
| ATOM | 153 | QG2  | THRM | 9 | -5.696 | 2.523  | 1.050  | 1.00 | 0.00 |
| ATOM | 154 | OG1  | THRM | 9 | -4.602 | 3.792  | 3.161  | 1.00 | 0.00 |
| ATOM | 155 | 1HG  | THRM | 9 | -4.652 | 4.743  | 3.295  | 1.00 | 0.00 |

|      |     |      |      |    |        |       |        |      |      |
|------|-----|------|------|----|--------|-------|--------|------|------|
| ATOM | 156 | CG2  | THRM | 9  | -5.386 | 2.750 | 1.211  | 1.00 | 0.00 |
| ATOM | 157 | 1HG2 | THRM | 9  | -6.368 | 3.248 | 1.305  | 1.00 | 0.00 |
| ATOM | 158 | 2HG2 | THRM | 9  | -5.254 | 2.552 | 0.131  | 1.00 | 0.00 |
| ATOM | 159 | 3HG2 | THRM | 9  | -5.466 | 1.768 | 1.714  | 1.00 | 0.00 |
| ATOM | 160 | C    | THRM | 9  | -1.785 | 3.931 | 2.313  | 1.00 | 0.00 |
| ATOM | 161 | O    | THRM | 9  | -2.115 | 4.861 | 3.022  | 1.00 | 0.00 |
| ATOM | 162 | N    | VALM | 10 | -0.520 | 3.672 | 2.043  | 1.00 | 0.00 |
| ATOM | 163 | QB   | VALM | 10 | -0.208 | 2.221 | 0.949  | 1.00 | 0.00 |
| ATOM | 164 | CN   | VALM | 10 | -0.270 | 2.508 | 1.165  | 1.00 | 0.00 |
| ATOM | 165 | 1HNB | VALM | 10 | 0.766  | 2.524 | 0.825  | 1.00 | 0.00 |
| ATOM | 166 | 2HNB | VALM | 10 | -0.455 | 1.587 | 1.718  | 1.00 | 0.00 |
| ATOM | 167 | 3HNB | VALM | 10 | -0.935 | 2.552 | 0.302  | 1.00 | 0.00 |
| ATOM | 168 | CA   | VALM | 10 | 0.567  | 4.486 | 2.577  | 1.00 | 0.00 |
| ATOM | 169 | HA   | VALM | 10 | 0.222  | 5.533 | 2.658  | 1.00 | 0.00 |
| ATOM | 170 | CB   | VALM | 10 | 0.977  | 3.959 | 4.010  | 1.00 | 0.00 |
| ATOM | 171 | HB   | VALM | 10 | 1.918  | 3.380 | 3.889  | 1.00 | 0.00 |
| ATOM | 172 | QG1  | VALM | 10 | 1.348  | 5.330 | 5.384  | 1.00 | 0.00 |
| ATOM | 173 | QG2  | VALM | 10 | -0.341 | 2.759 | 4.828  | 1.00 | 0.00 |
| ATOM | 174 | CG1  | VALM | 10 | 1.262  | 5.042 | 5.088  | 1.00 | 0.00 |
| ATOM | 175 | 1HG1 | VALM | 10 | 0.533  | 5.873 | 5.055  | 1.00 | 0.00 |
| ATOM | 176 | 2HG1 | VALM | 10 | 1.241  | 4.628 | 6.115  | 1.00 | 0.00 |
| ATOM | 177 | 3HG1 | VALM | 10 | 2.269  | 5.488 | 4.982  | 1.00 | 0.00 |
| ATOM | 178 | CG2  | VALM | 10 | -0.064 | 3.009 | 4.651  | 1.00 | 0.00 |
| ATOM | 179 | 1HG2 | VALM | 10 | -0.527 | 2.332 | 3.909  | 1.00 | 0.00 |
| ATOM | 180 | 2HG2 | VALM | 10 | 0.387  | 2.375 | 5.436  | 1.00 | 0.00 |
| ATOM | 181 | 3HG2 | VALM | 10 | -0.883 | 3.569 | 5.141  | 1.00 | 0.00 |
| ATOM | 182 | QQG  | VALM | 10 | 0.503  | 4.044 | 5.106  | 1.00 | 0.00 |
| ATOM | 183 | C    | VALM | 10 | 1.755  | 4.483 | 1.644  | 1.00 | 0.00 |
| ATOM | 184 | O    | VALM | 10 | 2.840  | 3.985 | 1.966  | 1.00 | 0.00 |
| ATOM | 185 | N    | ILEM | 11 | 1.564  | 5.043 | 0.465  | 1.00 | 0.00 |
| ATOM | 186 | QB   | ILEM | 11 | -0.118 | 5.733 | 0.159  | 1.00 | 0.00 |
| ATOM | 187 | CN   | ILEM | 11 | 0.213  | 5.597 | 0.220  | 1.00 | 0.00 |
| ATOM | 188 | 1HNB | ILEM | 11 | -0.410 | 5.436 | 1.098  | 1.00 | 0.00 |
| ATOM | 189 | 2HNB | ILEM | 11 | 0.290  | 6.666 | 0.020  | 1.00 | 0.00 |
| ATOM | 190 | 3HNB | ILEM | 11 | -0.233 | 5.099 | -0.640 | 1.00 | 0.00 |
| ATOM | 191 | CA   | ILEM | 11 | 2.623  | 5.112 | -0.539 | 1.00 | 0.00 |
| ATOM | 192 | HA   | ILEM | 11 | 2.211  | 5.630 | -1.424 | 1.00 | 0.00 |
| ATOM | 193 | CB   | ILEM | 11 | 3.864  | 5.941 | -0.010 | 1.00 | 0.00 |
| ATOM | 194 | HB   | ILEM | 11 | 3.672  | 6.150 | 1.063  | 1.00 | 0.00 |
| ATOM | 195 | QG2  | ILEM | 11 | 5.565  | 4.924 | -0.122 | 1.00 | 0.00 |
| ATOM | 196 | CG2  | ILEM | 11 | 5.204  | 5.147 | -0.102 | 1.00 | 0.00 |
| ATOM | 197 | 1HG2 | ILEM | 11 | 5.347  | 4.462 | 0.752  | 1.00 | 0.00 |
| ATOM | 198 | 2HG2 | ILEM | 11 | 5.263  | 4.493 | -0.989 | 1.00 | 0.00 |
| ATOM | 199 | 3HG2 | ILEM | 11 | 6.084  | 5.818 | -0.129 | 1.00 | 0.00 |
| ATOM | 200 | CG1  | ILEM | 11 | 4.070  | 7.323 | -0.709 | 1.00 | 0.00 |
| ATOM | 201 | 2HG1 | ILEM | 11 | 3.805  | 7.239 | -1.781 | 1.00 | 0.00 |
| ATOM | 202 | QG1  | ILEM | 11 | 3.805  | 7.239 | -1.781 | 1.00 | 0.00 |
| ATOM | 203 | QD1  | ILEM | 11 | 3.006  | 8.805 | -0.011 | 1.00 | 0.00 |
| ATOM | 204 | CD1  | ILEM | 11 | 3.226  | 8.490 | -0.156 | 1.00 | 0.00 |
| ATOM | 205 | 1HD1 | ILEM | 11 | 3.800  | 9.435 | -0.159 | 1.00 | 0.00 |
| ATOM | 206 | 2HD1 | ILEM | 11 | 2.316  | 8.661 | -0.761 | 1.00 | 0.00 |
| ATOM | 207 | 3HD1 | ILEM | 11 | 2.902  | 8.320 | 0.887  | 1.00 | 0.00 |
| ATOM | 208 | C    | ILEM | 11 | 3.024  | 3.731 | -0.999 | 1.00 | 0.00 |
| ATOM | 209 | O    | ILEM | 11 | 2.762  | 2.717 | -0.336 | 1.00 | 0.00 |
| ATOM | 210 | N    | PIPO | 12 | 3.669  | 3.669 | -2.148 | 1.00 | 0.00 |
| ATOM | 211 | CE   | PIPO | 12 | 4.120  | 2.419 | -2.721 | 1.00 | 0.00 |
| ATOM | 212 | CA   | PIPO | 12 | 3.996  | 4.854 | -2.926 | 1.00 | 0.00 |
| ATOM | 213 | HA   | PIPO | 12 | 4.460  | 5.624 | -2.311 | 1.00 | 0.00 |
| ATOM | 214 | CB   | PIPO | 12 | 4.979  | 4.531 | -4.068 | 1.00 | 0.00 |

|         |     |      |      |    |        |        |        |      |      |
|---------|-----|------|------|----|--------|--------|--------|------|------|
| ATOM    | 215 | 2HB  | PIPO | 12 | 5.198  | 5.440  | -4.627 | 1.00 | 0.00 |
| ATOM    | 216 | 3HB  | PIPO | 12 | 5.901  | 4.128  | -3.651 | 1.00 | 0.00 |
| ATOM    | 217 | QB   | PIPO | 12 | 5.550  | 4.784  | -4.139 | 1.00 | 0.00 |
| ATOM    | 218 | CG   | PIPO | 12 | 4.346  | 3.490  | -5.011 | 1.00 | 0.00 |
| ATOM    | 219 | 2HG  | PIPO | 12 | 5.041  | 3.262  | -5.819 | 1.00 | 0.00 |
| ATOM    | 220 | 3HG  | PIPO | 12 | 3.422  | 3.891  | -5.429 | 1.00 | 0.00 |
| ATOM    | 221 | QG   | PIPO | 12 | 4.232  | 3.576  | -5.624 | 1.00 | 0.00 |
| ATOM    | 222 | CD   | PIPO | 12 | 3.991  | 2.481  | -4.254 | 1.00 | 0.00 |
| ATOM    | 223 | 2HD  | PIPO | 12 | 4.330  | 1.539  | -4.686 | 1.00 | 0.00 |
| ATOM    | 224 | 3HD  | PIPO | 12 | 2.948  | 2.649  | -4.525 | 1.00 | 0.00 |
| ATOM    | 225 | QD   | PIPO | 12 | 3.639  | 2.094  | -4.606 | 1.00 | 0.00 |
| ATOM    | 226 | 1HE  | PIPO | 12 | 5.162  | 2.250  | -2.451 | 1.00 | 0.00 |
| ATOM    | 227 | 2HE  | PIPO | 12 | 3.509  | 1.602  | -2.337 | 1.00 | 0.00 |
| ATOM    | 228 | QE   | PIPO | 12 | 4.335  | 1.926  | -2.394 | 1.00 | 0.00 |
| ATOM    | 229 | C    | PIPO | 12 | 2.744  | 5.476  | -3.566 | 1.00 | 0.00 |
| ATOM    | 230 | O    | PIPO | 12 | 2.547  | 6.686  | -3.400 | 1.00 | 0.00 |
| ATOM    | 231 | O1'  | PHEO | 13 | 1.922  | 4.725  | -4.274 | 1.00 | 0.00 |
| ATOM    | 232 | CA   | PHEO | 13 | 0.499  | 5.030  | -4.389 | 1.00 | 0.00 |
| ATOM    | 233 | HA   | PHEO | 13 | 0.359  | 6.003  | -4.897 | 1.00 | 0.00 |
| ATOM    | 234 | CB   | PHEO | 13 | -0.124 | 5.082  | -2.961 | 1.00 | 0.00 |
| ATOM    | 235 | 2HB  | PHEO | 13 | 0.654  | 4.837  | -2.212 | 1.00 | 0.00 |
| ATOM    | 236 | QB   | PHEO | 13 | 0.654  | 4.837  | -2.212 | 1.00 | 0.00 |
| ATOM    | 237 | QD   | PHEO | 13 | -0.843 | 6.555  | -2.486 | 1.00 | 0.00 |
| ATOM    | 238 | QE   | PHEO | 13 | -1.813 | 8.696  | -1.752 | 1.00 | 0.00 |
| ATOM    | 239 | QR   | PHEO | 13 | -1.522 | 8.055  | -1.971 | 1.00 | 0.00 |
| ATOM    | 240 | CG   | PHEO | 13 | -0.789 | 6.406  | -2.552 | 1.00 | 0.00 |
| ATOM    | 241 | CD1  | PHEO | 13 | -0.269 | 7.616  | -3.023 | 1.00 | 0.00 |
| ATOM    | 242 | 1HD  | PHEO | 13 | 0.587  | 7.619  | -3.686 | 1.00 | 0.00 |
| ATOM    | 243 | CE1  | PHEO | 13 | -0.809 | 8.825  | -2.599 | 1.00 | 0.00 |
| ATOM    | 244 | 1HE  | PHEO | 13 | -0.380 | 9.755  | -2.945 | 1.00 | 0.00 |
| ATOM    | 245 | CZ   | PHEO | 13 | -1.884 | 8.832  | -1.714 | 1.00 | 0.00 |
| ATOM    | 246 | HZ   | PHEO | 13 | -2.299 | 9.773  | -1.382 | 1.00 | 0.00 |
| ATOM    | 247 | CE2  | PHEO | 13 | -2.416 | 7.631  | -1.250 | 1.00 | 0.00 |
| ATOM    | 248 | 2HE  | PHEO | 13 | -3.247 | 7.637  | -0.559 | 1.00 | 0.00 |
| ATOM    | 249 | CD2  | PHEO | 13 | -1.869 | 6.419  | -1.665 | 1.00 | 0.00 |
| ATOM    | 250 | 2HD  | PHEO | 13 | -2.273 | 5.492  | -1.285 | 1.00 | 0.00 |
| ATOM    | 251 | C    | PHEO | 13 | -0.224 | 3.962  | -5.175 | 1.00 | 0.00 |
| ATOM    | 252 | O    | PHEO | 13 | -1.409 | 4.117  | -5.582 | 1.00 | 0.00 |
| TER     |     |      |      |    |        |        |        |      |      |
| ENDMDL  |     |      |      |    |        |        |        |      |      |
| MODEL 3 |     |      |      |    |        |        |        |      |      |
| ATOM    | 1   | N    | VALM | 1  | -0.636 | 3.396  | -4.497 | 1.00 | 0.00 |
| ATOM    | 2   | QB   | VALM | 1  | -2.349 | 4.075  | -4.481 | 1.00 | 0.00 |
| ATOM    | 3   | CN   | VALM | 1  | -2.011 | 3.941  | -4.484 | 1.00 | 0.00 |
| ATOM    | 4   | 1HNB | VALM | 1  | -2.693 | 3.220  | -4.935 | 1.00 | 0.00 |
| ATOM    | 5   | 2HNB | VALM | 1  | -2.316 | 4.135  | -3.455 | 1.00 | 0.00 |
| ATOM    | 6   | 3HNB | VALM | 1  | -2.040 | 4.871  | -5.052 | 1.00 | 0.00 |
| ATOM    | 7   | CA   | VALM | 1  | -0.369 | 1.966  | -4.372 | 1.00 | 0.00 |
| ATOM    | 8   | HA   | VALM | 1  | -1.316 | 1.447  | -4.138 | 1.00 | 0.00 |
| ATOM    | 9   | CB   | VALM | 1  | 0.211  | 1.408  | -5.731 | 1.00 | 0.00 |
| ATOM    | 10  | HB   | VALM | 1  | 1.023  | 2.097  | -6.049 | 1.00 | 0.00 |
| ATOM    | 11  | QG1  | VALM | 1  | 1.000  | -0.403 | -5.678 | 1.00 | 0.00 |
| ATOM    | 12  | QG2  | VALM | 1  | -1.099 | 1.355  | -7.191 | 1.00 | 0.00 |
| ATOM    | 13  | CG1  | VALM | 1  | 0.836  | -0.014 | -5.683 | 1.00 | 0.00 |
| ATOM    | 14  | 1HG1 | VALM | 1  | 1.429  | -0.185 | -4.764 | 1.00 | 0.00 |
| ATOM    | 15  | 2HG1 | VALM | 1  | 0.069  | -0.811 | -5.729 | 1.00 | 0.00 |
| ATOM    | 16  | 3HG1 | VALM | 1  | 1.503  | -0.213 | -6.542 | 1.00 | 0.00 |
| ATOM    | 17  | CG2  | VALM | 1  | -0.822 | 1.359  | -6.882 | 1.00 | 0.00 |
| ATOM    | 18  | 1HG2 | VALM | 1  | -1.052 | 0.325  | -7.198 | 1.00 | 0.00 |



Supplementary Material for Organic & Biomolecular Chemistry  
 This journal is © The Royal Society of Chemistry 2006

|      |    |      |      |   |        |        |        |      |      |
|------|----|------|------|---|--------|--------|--------|------|------|
| ATOM | 19 | 2HG2 | VALM | 1 | -1.779 | 1.833  | -6.596 | 1.00 | 0.00 |
| ATOM | 20 | 3HG2 | VALM | 1 | -0.466 | 1.906  | -7.777 | 1.00 | 0.00 |
| ATOM | 21 | QQG  | VALM | 1 | -0.049 | 0.476  | -6.435 | 1.00 | 0.00 |
| ATOM | 22 | C    | VALM | 1 | 0.579  | 1.690  | -3.230 | 1.00 | 0.00 |
| ATOM | 23 | O    | VALM | 1 | 1.563  | 2.410  | -3.072 | 1.00 | 0.00 |
| ATOM | 24 | N    | PRO  | 2 | 0.264  | 0.632  | -2.435 | 1.00 | 0.00 |
| ATOM | 25 | CD   | PRO  | 2 | -0.893 | -0.244 | -2.592 | 1.00 | 0.00 |
| ATOM | 26 | CA   | PRO  | 2 | 1.101  | 0.269  | -1.305 | 1.00 | 0.00 |
| ATOM | 27 | HA   | PRO  | 2 | 1.393  | 1.089  | -0.813 | 1.00 | 0.00 |
| ATOM | 28 | CB   | PRO  | 2 | 0.228  | -0.625 | -0.440 | 1.00 | 0.00 |
| ATOM | 29 | 2HB  | PRO  | 2 | -0.164 | -0.077 | 0.417  | 1.00 | 0.00 |
| ATOM | 30 | QB   | PRO  | 2 | -0.164 | -0.077 | 0.417  | 1.00 | 0.00 |
| ATOM | 31 | CG   | PRO  | 2 | -0.898 | -1.106 | -1.341 | 1.00 | 0.00 |
| ATOM | 32 | 2HG  | PRO  | 2 | -1.857 | -1.030 | -0.828 | 1.00 | 0.00 |
| ATOM | 33 | QG   | PRO  | 2 | -1.857 | -1.030 | -0.828 | 1.00 | 0.00 |
| ATOM | 34 | 2HD  | PRO  | 2 | -1.816 | 0.330  | -2.680 | 1.00 | 0.00 |
| ATOM | 35 | QD   | PRO  | 2 | -1.816 | 0.330  | -2.680 | 1.00 | 0.00 |
| ATOM | 36 | C    | PRO  | 2 | 2.385  | -0.419 | -1.772 | 1.00 | 0.00 |
| ATOM | 37 | O    | PRO  | 2 | 2.444  | -0.943 | -2.884 | 1.00 | 0.00 |
| ATOM | 38 | N    | ILE  | 3 | 3.381  | -0.397 | -0.899 | 1.00 | 0.00 |
| ATOM | 39 | H    | ILE  | 3 | 3.325  | 0.031  | 0.003  | 1.00 | 0.00 |
| ATOM | 40 | CA   | ILE  | 3 | 4.661  | -1.013 | -1.208 | 1.00 | 0.00 |
| ATOM | 41 | HA   | ILE  | 3 | 4.676  | -1.215 | -2.280 | 1.00 | 0.00 |
| ATOM | 42 | CB   | ILE  | 3 | 5.808  | -0.044 | -0.913 | 1.00 | 0.00 |
| ATOM | 43 | HB   | ILE  | 3 | 6.498  | -0.531 | -0.225 | 1.00 | 0.00 |
| ATOM | 44 | QG2  | ILE  | 3 | 6.778  | 0.357  | -2.488 | 1.00 | 0.00 |
| ATOM | 45 | CG2  | ILE  | 3 | 6.592  | 0.281  | -2.186 | 1.00 | 0.00 |
| ATOM | 46 | 1HG2 | ILE  | 3 | 6.976  | 1.298  | -2.126 | 1.00 | 0.00 |
| ATOM | 47 | 2HG2 | ILE  | 3 | 7.423  | -0.417 | -2.288 | 1.00 | 0.00 |
| ATOM | 48 | 3HG2 | ILE  | 3 | 5.934  | 0.191  | -3.051 | 1.00 | 0.00 |
| ATOM | 49 | CG1  | ILE  | 3 | 5.292  | 1.219  | -0.220 | 1.00 | 0.00 |
| ATOM | 50 | 2HG1 | ILE  | 3 | 4.340  | 1.517  | -0.658 | 1.00 | 0.00 |
| ATOM | 51 | QG1  | ILE  | 3 | 4.340  | 1.517  | -0.658 | 1.00 | 0.00 |
| ATOM | 52 | QD1  | ILE  | 3 | 5.078  | 0.932  | 1.639  | 1.00 | 0.00 |
| ATOM | 53 | CD1  | ILE  | 3 | 5.119  | 0.988  | 1.283  | 1.00 | 0.00 |
| ATOM | 54 | 1HD1 | ILE  | 3 | 5.568  | 0.033  | 1.557  | 1.00 | 0.00 |
| ATOM | 55 | 2HD1 | ILE  | 3 | 5.609  | 1.791  | 1.833  | 1.00 | 0.00 |
| ATOM | 56 | 3HD1 | ILE  | 3 | 4.057  | 0.973  | 1.528  | 1.00 | 0.00 |
| ATOM | 57 | C    | ILE  | 3 | 4.774  | -2.344 | -0.463 | 1.00 | 0.00 |
| ATOM | 58 | O    | ILE  | 3 | 5.263  | -3.364 | -0.972 | 1.00 | 0.00 |
| ATOM | 59 | N    | PIP  | 4 | 4.311  | -2.333 | 0.774  | 1.00 | 0.00 |
| ATOM | 60 | CE   | PIP  | 4 | 3.738  | -1.151 | 1.378  | 1.00 | 0.00 |
| ATOM | 61 | CA   | PIP  | 4 | 4.353  | -3.505 | 1.634  | 1.00 | 0.00 |
| ATOM | 62 | HA   | PIP  | 4 | 5.341  | -3.965 | 1.640  | 1.00 | 0.00 |
| ATOM | 63 | CB   | PIP  | 4 | 4.008  | -3.151 | 3.094  | 1.00 | 0.00 |
| ATOM | 64 | 2HB  | PIP  | 4 | 4.050  | -4.050 | 3.706  | 1.00 | 0.00 |
| ATOM | 65 | 3HB  | PIP  | 4 | 4.726  | -2.422 | 3.470  | 1.00 | 0.00 |
| ATOM | 66 | QB   | PIP  | 4 | 4.388  | -3.236 | 3.588  | 1.00 | 0.00 |
| ATOM | 67 | CG   | PIP  | 4 | 2.590  | -2.553 | 3.155  | 1.00 | 0.00 |
| ATOM | 68 | 2HG  | PIP  | 4 | 2.346  | -2.301 | 4.187  | 1.00 | 0.00 |
| ATOM | 69 | 3HG  | PIP  | 4 | 1.872  | -3.281 | 2.779  | 1.00 | 0.00 |
| ATOM | 70 | QG   | PIP  | 4 | 2.109  | -2.791 | 3.483  | 1.00 | 0.00 |
| ATOM | 71 | CD   | PIP  | 4 | 2.576  | -1.557 | 2.302  | 1.00 | 0.00 |
| ATOM | 72 | 2HD  | PIP  | 4 | 2.145  | -0.666 | 2.758  | 1.00 | 0.00 |
| ATOM | 73 | 3HD  | PIP  | 4 | 1.812  | -2.073 | 1.721  | 1.00 | 0.00 |
| ATOM | 74 | QD   | PIP  | 4 | 1.978  | -1.370 | 2.240  | 1.00 | 0.00 |
| ATOM | 75 | 1HE  | PIP  | 4 | 4.501  | -0.635 | 1.962  | 1.00 | 0.00 |
| ATOM | 76 | 2HE  | PIP  | 4 | 3.367  | -0.486 | 0.599  | 1.00 | 0.00 |
| ATOM | 77 | QE   | PIP  | 4 | 3.934  | -0.560 | 1.280  | 1.00 | 0.00 |

Supplementary Material for Organic & Biomolecular Chemistry  
 This journal is © The Royal Society of Chemistry 2006

|      |     |      |      |   |        |        |        |      |      |
|------|-----|------|------|---|--------|--------|--------|------|------|
| ATOM | 78  | C    | PIP  | 4 | 3.352  | -4.580 | 1.179  | 1.00 | 0.00 |
| ATOM | 79  | O    | PIP  | 4 | 2.661  | -4.281 | 0.206  | 1.00 | 0.00 |
| ATOM | 80  | N    | ALA  | 5 | 3.284  | -5.737 | 1.820  | 1.00 | 0.00 |
| ATOM | 81  | H    | ALA  | 5 | 3.850  | -5.973 | 2.610  | 1.00 | 0.00 |
| ATOM | 82  | CA   | ALA  | 5 | 2.353  | -6.771 | 1.401  | 1.00 | 0.00 |
| ATOM | 83  | HA   | ALA  | 5 | 2.775  | -7.262 | 0.523  | 1.00 | 0.00 |
| ATOM | 84  | QB   | ALA  | 5 | 2.165  | -8.051 | 2.784  | 1.00 | 0.00 |
| ATOM | 85  | CB   | ALA  | 5 | 2.201  | -7.805 | 2.519  | 1.00 | 0.00 |
| ATOM | 86  | 1HB  | ALA  | 5 | 2.907  | -7.581 | 3.319  | 1.00 | 0.00 |
| ATOM | 87  | 2HB  | ALA  | 5 | 1.185  | -7.770 | 2.910  | 1.00 | 0.00 |
| ATOM | 88  | 3HB  | ALA  | 5 | 2.404  | -8.801 | 2.123  | 1.00 | 0.00 |
| ATOM | 89  | C    | ALA  | 5 | 1.020  | -6.126 | 1.018  | 1.00 | 0.00 |
| ATOM | 90  | O    | ALA  | 5 | 0.687  | -5.046 | 1.504  | 1.00 | 0.00 |
| ATOM | 91  | N    | PRO  | 6 | 0.273  | -6.834 | 0.129  | 1.00 | 0.00 |
| ATOM | 92  | CD   | PRO  | 6 | 0.636  | -8.116 | -0.467 | 1.00 | 0.00 |
| ATOM | 93  | CA   | PRO  | 6 | -1.017 | -6.341 | -0.324 | 1.00 | 0.00 |
| ATOM | 94  | HA   | PRO  | 6 | -0.969 | -5.359 | -0.506 | 1.00 | 0.00 |
| ATOM | 95  | CB   | PRO  | 6 | -1.319 | -7.133 | -1.586 | 1.00 | 0.00 |
| ATOM | 96  | 2HB  | PRO  | 6 | -1.121 | -6.537 | -2.477 | 1.00 | 0.00 |
| ATOM | 97  | QB   | PRO  | 6 | -1.121 | -6.537 | -2.477 | 1.00 | 0.00 |
| ATOM | 98  | CG   | PRO  | 6 | -0.419 | -8.356 | -1.536 | 1.00 | 0.00 |
| ATOM | 99  | 2HG  | PRO  | 6 | 0.052  | -8.523 | -2.506 | 1.00 | 0.00 |
| ATOM | 100 | QG   | PRO  | 6 | 0.052  | -8.523 | -2.506 | 1.00 | 0.00 |
| ATOM | 101 | 2HD  | PRO  | 6 | 1.636  | -8.084 | -0.898 | 1.00 | 0.00 |
| ATOM | 102 | QD   | PRO  | 6 | 1.636  | -8.084 | -0.898 | 1.00 | 0.00 |
| ATOM | 103 | C    | PRO  | 6 | -2.081 | -6.515 | 0.760  | 1.00 | 0.00 |
| ATOM | 104 | O    | PRO  | 6 | -2.463 | -7.622 | 1.160  | 1.00 | 0.00 |
| ATOM | 105 | N    | THRM | 7 | -2.571 | -5.390 | 1.247  | 1.00 | 0.00 |
| ATOM | 106 | QB   | THRM | 7 | -3.858 | -5.567 | 2.556  | 1.00 | 0.00 |
| ATOM | 107 | CN   | THRM | 7 | -3.604 | -5.532 | 2.298  | 1.00 | 0.00 |
| ATOM | 108 | 1HNB | THRM | 7 | -3.783 | -6.589 | 2.490  | 1.00 | 0.00 |
| ATOM | 109 | 2HNB | THRM | 7 | -3.260 | -5.049 | 3.213  | 1.00 | 0.00 |
| ATOM | 110 | 3HNB | THRM | 7 | -4.529 | -5.062 | 1.965  | 1.00 | 0.00 |
| ATOM | 111 | CA   | THRM | 7 | -2.123 | -4.083 | 0.776  | 1.00 | 0.00 |
| ATOM | 112 | HA   | THRM | 7 | -1.017 | -4.081 | 0.757  | 1.00 | 0.00 |
| ATOM | 113 | CB   | THRM | 7 | -2.650 | -3.809 | -0.673 | 1.00 | 0.00 |
| ATOM | 114 | HB   | THRM | 7 | -1.776 | -3.736 | -1.354 | 1.00 | 0.00 |
| ATOM | 115 | QG2  | THRM | 7 | -3.900 | -5.129 | -1.405 | 1.00 | 0.00 |
| ATOM | 116 | OG1  | THRM | 7 | -3.365 | -2.580 | -0.717 | 1.00 | 0.00 |
| ATOM | 117 | 1HG  | THRM | 7 | -3.629 | -2.458 | -1.635 | 1.00 | 0.00 |
| ATOM | 118 | CG2  | THRM | 7 | -3.632 | -4.849 | -1.252 | 1.00 | 0.00 |
| ATOM | 119 | 1HG2 | THRM | 7 | -4.110 | -5.455 | -0.461 | 1.00 | 0.00 |
| ATOM | 120 | 2HG2 | THRM | 7 | -4.462 | -4.380 | -1.813 | 1.00 | 0.00 |
| ATOM | 121 | 3HG2 | THRM | 7 | -3.127 | -5.551 | -1.942 | 1.00 | 0.00 |
| ATOM | 122 | C    | THRM | 7 | -2.559 | -2.988 | 1.720  | 1.00 | 0.00 |
| ATOM | 123 | O    | THRM | 7 | -3.384 | -3.239 | 2.597  | 1.00 | 0.00 |
| ATOM | 124 | N    | VAL  | 8 | -2.005 | -1.800 | 1.527  | 1.00 | 0.00 |
| ATOM | 125 | H    | VAL  | 8 | -1.335 | -1.605 | 0.811  | 1.00 | 0.00 |
| ATOM | 126 | CA   | VAL  | 8 | -2.348 | -0.669 | 2.372  | 1.00 | 0.00 |
| ATOM | 127 | HA   | VAL  | 8 | -3.365 | -0.823 | 2.732  | 1.00 | 0.00 |
| ATOM | 128 | CB   | VAL  | 8 | -1.418 | -0.623 | 3.588  | 1.00 | 0.00 |
| ATOM | 129 | HB   | VAL  | 8 | -1.209 | 0.424  | 3.810  | 1.00 | 0.00 |
| ATOM | 130 | QG1  | VAL  | 8 | -2.250 | -1.386 | 5.107  | 1.00 | 0.00 |
| ATOM | 131 | QG2  | VAL  | 8 | 0.229  | -1.479 | 3.213  | 1.00 | 0.00 |
| ATOM | 132 | CG1  | VAL  | 8 | -2.090 | -1.240 | 4.816  | 1.00 | 0.00 |
| ATOM | 133 | 1HG1 | VAL  | 8 | -3.116 | -1.513 | 4.570  | 1.00 | 0.00 |
| ATOM | 134 | 2HG1 | VAL  | 8 | -1.541 | -2.130 | 5.122  | 1.00 | 0.00 |
| ATOM | 135 | 3HG1 | VAL  | 8 | -2.093 | -0.516 | 5.630  | 1.00 | 0.00 |
| ATOM | 136 | CG2  | VAL  | 8 | -0.087 | -1.315 | 3.286  | 1.00 | 0.00 |

|      |     |      |      |    |        |        |        |      |      |
|------|-----|------|------|----|--------|--------|--------|------|------|
| ATOM | 137 | 1HG2 | VAL  | 8  | -0.221 | -2.395 | 3.327  | 1.00 | 0.00 |
| ATOM | 138 | 2HG2 | VAL  | 8  | 0.253  | -1.029 | 2.290  | 1.00 | 0.00 |
| ATOM | 139 | 3HG2 | VAL  | 8  | 0.655  | -1.012 | 4.024  | 1.00 | 0.00 |
| ATOM | 140 | QOG  | VAL  | 8  | -1.010 | -1.432 | 4.160  | 1.00 | 0.00 |
| ATOM | 141 | C    | VAL  | 8  | -2.307 | 0.615  | 1.541  | 1.00 | 0.00 |
| ATOM | 142 | O    | VAL  | 8  | -1.887 | 0.651  | 0.378  | 1.00 | 0.00 |
| ATOM | 143 | N    | THRM | 9  | -2.758 | 1.693  | 2.156  | 1.00 | 0.00 |
| ATOM | 144 | QB   | THRM | 9  | -3.345 | 1.449  | 3.887  | 1.00 | 0.00 |
| ATOM | 145 | CN   | THRM | 9  | -3.229 | 1.497  | 3.546  | 1.00 | 0.00 |
| ATOM | 146 | 1HNB | THRM | 9  | -3.114 | 0.450  | 3.824  | 1.00 | 0.00 |
| ATOM | 147 | 2HNB | THRM | 9  | -2.640 | 2.119  | 4.220  | 1.00 | 0.00 |
| ATOM | 148 | 3HNB | THRM | 9  | -4.280 | 1.779  | 3.616  | 1.00 | 0.00 |
| ATOM | 149 | CA   | THRM | 9  | -2.790 | 2.998  | 1.505  | 1.00 | 0.00 |
| ATOM | 150 | HA   | THRM | 9  | -2.475 | 2.871  | 0.453  | 1.00 | 0.00 |
| ATOM | 151 | CB   | THRM | 9  | -4.240 | 3.589  | 1.528  | 1.00 | 0.00 |
| ATOM | 152 | HB   | THRM | 9  | -4.322 | 4.278  | 2.396  | 1.00 | 0.00 |
| ATOM | 153 | QG2  | THRM | 9  | -4.812 | 4.556  | -0.079 | 1.00 | 0.00 |
| ATOM | 154 | OG1  | THRM | 9  | -5.198 | 2.551  | 1.680  | 1.00 | 0.00 |
| ATOM | 155 | 1HG  | THRM | 9  | -5.215 | 2.078  | 0.843  | 1.00 | 0.00 |
| ATOM | 156 | CG2  | THRM | 9  | -4.689 | 4.348  | 0.260  | 1.00 | 0.00 |
| ATOM | 157 | 1HG2 | THRM | 9  | -5.639 | 4.892  | 0.416  | 1.00 | 0.00 |
| ATOM | 158 | 2HG2 | THRM | 9  | -3.956 | 5.112  | -0.058 | 1.00 | 0.00 |
| ATOM | 159 | 3HG2 | THRM | 9  | -4.839 | 3.664  | -0.596 | 1.00 | 0.00 |
| ATOM | 160 | C    | THRM | 9  | -1.815 | 3.951  | 2.155  | 1.00 | 0.00 |
| ATOM | 161 | O    | THRM | 9  | -2.185 | 4.898  | 2.819  | 1.00 | 0.00 |
| ATOM | 162 | N    | VALM | 10 | -0.535 | 3.693  | 1.957  | 1.00 | 0.00 |
| ATOM | 163 | QB   | VALM | 10 | -0.158 | 2.214  | 0.922  | 1.00 | 0.00 |
| ATOM | 164 | CN   | VALM | 10 | -0.233 | 2.506  | 1.126  | 1.00 | 0.00 |
| ATOM | 165 | 1HNB | VALM | 10 | -0.445 | 1.600  | 1.694  | 1.00 | 0.00 |
| ATOM | 166 | 2HNB | VALM | 10 | -0.849 | 2.524  | 0.228  | 1.00 | 0.00 |
| ATOM | 167 | 3HNB | VALM | 10 | 0.820  | 2.519  | 0.844  | 1.00 | 0.00 |
| ATOM | 168 | CA   | VALM | 10 | 0.519  | 4.529  | 2.524  | 1.00 | 0.00 |
| ATOM | 169 | HA   | VALM | 10 | 0.166  | 5.576  | 2.555  | 1.00 | 0.00 |
| ATOM | 170 | CB   | VALM | 10 | 0.854  | 4.047  | 3.992  | 1.00 | 0.00 |
| ATOM | 171 | HB   | VALM | 10 | 1.750  | 3.395  | 3.926  | 1.00 | 0.00 |
| ATOM | 172 | QG1  | VALM | 10 | 1.292  | 5.467  | 5.294  | 1.00 | 0.00 |
| ATOM | 173 | QG2  | VALM | 10 | -0.567 | 2.984  | 4.827  | 1.00 | 0.00 |
| ATOM | 174 | CG1  | VALM | 10 | 1.194  | 5.160  | 5.021  | 1.00 | 0.00 |
| ATOM | 175 | 1HG1 | VALM | 10 | 0.824  | 4.924  | 6.037  | 1.00 | 0.00 |
| ATOM | 176 | 2HG1 | VALM | 10 | 2.283  | 5.337  | 5.104  | 1.00 | 0.00 |
| ATOM | 177 | 3HG1 | VALM | 10 | 0.768  | 6.141  | 4.740  | 1.00 | 0.00 |
| ATOM | 178 | CG2  | VALM | 10 | -0.271 | 3.212  | 4.650  | 1.00 | 0.00 |
| ATOM | 179 | 1HG2 | VALM | 10 | -1.234 | 3.755  | 4.679  | 1.00 | 0.00 |
| ATOM | 180 | 2HG2 | VALM | 10 | -0.447 | 2.264  | 4.112  | 1.00 | 0.00 |
| ATOM | 181 | 3HG2 | VALM | 10 | -0.019 | 2.932  | 5.691  | 1.00 | 0.00 |
| ATOM | 182 | QOG  | VALM | 10 | 0.363  | 4.226  | 5.060  | 1.00 | 0.00 |
| ATOM | 183 | C    | VALM | 10 | 1.754  | 4.505  | 1.656  | 1.00 | 0.00 |
| ATOM | 184 | O    | VALM | 10 | 2.825  | 4.029  | 2.052  | 1.00 | 0.00 |
| ATOM | 185 | N    | ILEM | 11 | 1.624  | 5.022  | 0.449  | 1.00 | 0.00 |
| ATOM | 186 | QB   | ILEM | 11 | -0.046 | 5.685  | 0.030  | 1.00 | 0.00 |
| ATOM | 187 | CN   | ILEM | 11 | 0.284  | 5.554  | 0.113  | 1.00 | 0.00 |
| ATOM | 188 | 1HNB | ILEM | 11 | -0.386 | 5.417  | 0.962  | 1.00 | 0.00 |
| ATOM | 189 | 2HNB | ILEM | 11 | 0.362  | 6.616  | -0.119 | 1.00 | 0.00 |
| ATOM | 190 | 3HNB | ILEM | 11 | -0.113 | 5.022  | -0.751 | 1.00 | 0.00 |
| ATOM | 191 | CA   | ILEM | 11 | 2.733  | 5.067  | -0.498 | 1.00 | 0.00 |
| ATOM | 192 | HA   | ILEM | 11 | 2.400  | 5.651  | -1.377 | 1.00 | 0.00 |
| ATOM | 193 | CB   | ILEM | 11 | 3.996  | 5.788  | 0.128  | 1.00 | 0.00 |
| ATOM | 194 | HB   | ILEM | 11 | 3.772  | 5.943  | 1.204  | 1.00 | 0.00 |
| ATOM | 195 | QG2  | ILEM | 11 | 5.650  | 4.697  | 0.016  | 1.00 | 0.00 |

Supplementary Material for Organic & Biomolecular Chemistry  
 This journal is © The Royal Society of Chemistry 2006

|        |     |      |      |    |        |       |        |      |      |
|--------|-----|------|------|----|--------|-------|--------|------|------|
| ATOM   | 196 | CG2  | ILEM | 11 | 5.293  | 4.925 | 0.036  | 1.00 | 0.00 |
| ATOM   | 197 | 1HG2 | ILEM | 11 | 6.210  | 5.532 | 0.135  | 1.00 | 0.00 |
| ATOM   | 198 | 2HG2 | ILEM | 11 | 5.373  | 4.175 | 0.841  | 1.00 | 0.00 |
| ATOM   | 199 | 3HG2 | ILEM | 11 | 5.366  | 4.384 | -0.927 | 1.00 | 0.00 |
| ATOM   | 200 | CG1  | ILEM | 11 | 4.307  | 7.196 | -0.473 | 1.00 | 0.00 |
| ATOM   | 201 | 2HG1 | ILEM | 11 | 4.093  | 7.190 | -1.559 | 1.00 | 0.00 |
| ATOM   | 202 | QG1  | ILEM | 11 | 4.093  | 7.190 | -1.559 | 1.00 | 0.00 |
| ATOM   | 203 | QD1  | ILEM | 11 | 3.273  | 8.682 | 0.261  | 1.00 | 0.00 |
| ATOM   | 204 | CD1  | ILEM | 11 | 3.495  | 8.372 | 0.109  | 1.00 | 0.00 |
| ATOM   | 205 | 1HD1 | ILEM | 11 | 2.450  | 8.351 | -0.251 | 1.00 | 0.00 |
| ATOM   | 206 | 2HD1 | ILEM | 11 | 3.460  | 8.338 | 1.214  | 1.00 | 0.00 |
| ATOM   | 207 | 3HD1 | ILEM | 11 | 3.908  | 9.355 | -0.180 | 1.00 | 0.00 |
| ATOM   | 208 | C    | ILEM | 11 | 3.068  | 3.685 | -1.004 | 1.00 | 0.00 |
| ATOM   | 209 | O    | ILEM | 11 | 2.755  | 2.662 | -0.379 | 1.00 | 0.00 |
| ATOM   | 210 | N    | PIPO | 12 | 3.718  | 3.632 | -2.152 | 1.00 | 0.00 |
| ATOM   | 211 | CE   | PIPO | 12 | 4.110  | 2.382 | -2.767 | 1.00 | 0.00 |
| ATOM   | 212 | CA   | PIPO | 12 | 4.107  | 4.825 | -2.887 | 1.00 | 0.00 |
| ATOM   | 213 | HA   | PIPO | 12 | 4.604  | 5.550 | -2.243 | 1.00 | 0.00 |
| ATOM   | 214 | CB   | PIPO | 12 | 5.079  | 4.494 | -4.035 | 1.00 | 0.00 |
| ATOM   | 215 | 2HB  | PIPO | 12 | 5.348  | 5.410 | -4.561 | 1.00 | 0.00 |
| ATOM   | 216 | 3HB  | PIPO | 12 | 5.979  | 4.032 | -3.628 | 1.00 | 0.00 |
| ATOM   | 217 | QB   | PIPO | 12 | 5.663  | 4.721 | -4.094 | 1.00 | 0.00 |
| ATOM   | 218 | CG   | PIPO | 12 | 4.402  | 3.519 | -5.017 | 1.00 | 0.00 |
| ATOM   | 219 | 2HG  | PIPO | 12 | 5.091  | 3.285 | -5.828 | 1.00 | 0.00 |
| ATOM   | 220 | 3HG  | PIPO | 12 | 3.504  | 3.980 | -5.424 | 1.00 | 0.00 |
| ATOM   | 221 | QG   | PIPO | 12 | 4.297  | 3.632 | -5.626 | 1.00 | 0.00 |
| ATOM   | 222 | CD   | PIPO | 12 | 3.994  | 2.502 | -4.298 | 1.00 | 0.00 |
| ATOM   | 223 | 2HD  | PIPO | 12 | 4.289  | 1.560 | -4.760 | 1.00 | 0.00 |
| ATOM   | 224 | 3HD  | PIPO | 12 | 2.963  | 2.732 | -4.567 | 1.00 | 0.00 |
| ATOM   | 225 | QD   | PIPO | 12 | 3.626  | 2.146 | -4.664 | 1.00 | 0.00 |
| ATOM   | 226 | 1HE  | PIPO | 12 | 5.141  | 2.151 | -2.498 | 1.00 | 0.00 |
| ATOM   | 227 | 2HE  | PIPO | 12 | 3.457  | 1.583 | -2.415 | 1.00 | 0.00 |
| ATOM   | 228 | QE   | PIPO | 12 | 4.299  | 1.867 | -2.457 | 1.00 | 0.00 |
| ATOM   | 229 | C    | PIPO | 12 | 2.891  | 5.529 | -3.511 | 1.00 | 0.00 |
| ATOM   | 230 | O    | PIPO | 12 | 2.711  | 6.723 | -3.241 | 1.00 | 0.00 |
| ATOM   | 231 | O1'  | PHEO | 13 | 2.080  | 4.864 | -4.313 | 1.00 | 0.00 |
| ATOM   | 232 | CA   | PHEO | 13 | 0.671  | 5.217 | -4.456 | 1.00 | 0.00 |
| ATOM   | 233 | HA   | PHEO | 13 | 0.567  | 6.109 | -5.101 | 1.00 | 0.00 |
| ATOM   | 234 | CB   | PHEO | 13 | 0.078  | 5.510 | -3.044 | 1.00 | 0.00 |
| ATOM   | 235 | 2HB  | PHEO | 13 | 0.905  | 5.663 | -2.323 | 1.00 | 0.00 |
| ATOM   | 236 | QB   | PHEO | 13 | 0.905  | 5.663 | -2.323 | 1.00 | 0.00 |
| ATOM   | 237 | QD   | PHEO | 13 | -1.002 | 6.828 | -2.953 | 1.00 | 0.00 |
| ATOM   | 238 | QE   | PHEO | 13 | -2.607 | 8.693 | -2.882 | 1.00 | 0.00 |
| ATOM   | 239 | QR   | PHEO | 13 | -2.127 | 8.134 | -2.904 | 1.00 | 0.00 |
| ATOM   | 240 | CG   | PHEO | 13 | -0.883 | 6.705 | -2.940 | 1.00 | 0.00 |
| ATOM   | 241 | CD1  | PHEO | 13 | -2.145 | 6.529 | -2.363 | 1.00 | 0.00 |
| ATOM   | 242 | 1HD  | PHEO | 13 | -2.436 | 5.561 | -1.974 | 1.00 | 0.00 |
| ATOM   | 243 | CE1  | PHEO | 13 | -3.055 | 7.579 | -2.333 | 1.00 | 0.00 |
| ATOM   | 244 | 1HE  | PHEO | 13 | -4.039 | 7.425 | -1.912 | 1.00 | 0.00 |
| ATOM   | 245 | CZ   | PHEO | 13 | -2.705 | 8.817 | -2.866 | 1.00 | 0.00 |
| ATOM   | 246 | HZ   | PHEO | 13 | -3.416 | 9.630 | -2.848 | 1.00 | 0.00 |
| ATOM   | 247 | CE2  | PHEO | 13 | -1.445 | 9.003 | -3.433 | 1.00 | 0.00 |
| ATOM   | 248 | 2HE  | PHEO | 13 | -1.176 | 9.961 | -3.852 | 1.00 | 0.00 |
| ATOM   | 249 | CD2  | PHEO | 13 | -0.536 | 7.949 | -3.472 | 1.00 | 0.00 |
| ATOM   | 250 | 2HD  | PHEO | 13 | 0.431  | 8.095 | -3.932 | 1.00 | 0.00 |
| ATOM   | 251 | C    | PHEO | 13 | -0.112 | 4.079 | -5.065 | 1.00 | 0.00 |
| ATOM   | 252 | O    | PHEO | 13 | -0.190 | 3.914 | -6.314 | 1.00 | 0.00 |
| TER    |     |      |      |    |        |       |        |      |      |
| ENDMDL |     |      |      |    |        |       |        |      |      |

| MODEL | 4  |      |      |   |        |        |        |      |      |
|-------|----|------|------|---|--------|--------|--------|------|------|
| ATOM  | 1  | N    | VALM | 1 | 0.085  | 3.231  | -5.046 | 1.00 | 0.00 |
| ATOM  | 2  | QB   | VALM | 1 | 1.142  | 3.232  | -6.557 | 1.00 | 0.00 |
| ATOM  | 3  | CN   | VALM | 1 | 0.934  | 3.231  | -6.258 | 1.00 | 0.00 |
| ATOM  | 4  | 1HNB | VALM | 1 | 1.978  | 3.346  | -5.971 | 1.00 | 0.00 |
| ATOM  | 5  | 2HNB | VALM | 1 | 0.805  | 2.291  | -6.793 | 1.00 | 0.00 |
| ATOM  | 6  | 3HNB | VALM | 1 | 0.642  | 4.059  | -6.906 | 1.00 | 0.00 |
| ATOM  | 7  | CA   | VALM | 1 | -0.292 | 1.994  | -4.367 | 1.00 | 0.00 |
| ATOM  | 8  | HA   | VALM | 1 | -1.302 | 2.120  | -3.934 | 1.00 | 0.00 |
| ATOM  | 9  | CB   | VALM | 1 | -0.314 | 0.799  | -5.401 | 1.00 | 0.00 |
| ATOM  | 10 | HB   | VALM | 1 | -0.190 | 1.241  | -6.413 | 1.00 | 0.00 |
| ATOM  | 11 | QG1  | VALM | 1 | 1.108  | -0.557 | -5.193 | 1.00 | 0.00 |
| ATOM  | 12 | QG2  | VALM | 1 | -1.998 | -0.206 | -5.414 | 1.00 | 0.00 |
| ATOM  | 13 | CG1  | VALM | 1 | 0.806  | -0.266 | -5.246 | 1.00 | 0.00 |
| ATOM  | 14 | 1HG1 | VALM | 1 | 1.339  | -0.463 | -6.196 | 1.00 | 0.00 |
| ATOM  | 15 | 2HG1 | VALM | 1 | 1.567  | 0.030  | -4.499 | 1.00 | 0.00 |
| ATOM  | 16 | 3HG1 | VALM | 1 | 0.418  | -1.237 | -4.885 | 1.00 | 0.00 |
| ATOM  | 17 | CG2  | VALM | 1 | -1.639 | 0.001  | -5.411 | 1.00 | 0.00 |
| ATOM  | 18 | 1HG2 | VALM | 1 | -1.472 | -1.090 | -5.334 | 1.00 | 0.00 |
| ATOM  | 19 | 2HG2 | VALM | 1 | -2.299 | 0.290  | -4.573 | 1.00 | 0.00 |
| ATOM  | 20 | 3HG2 | VALM | 1 | -2.221 | 0.181  | -6.335 | 1.00 | 0.00 |
| ATOM  | 21 | QQG  | VALM | 1 | -0.445 | -0.381 | -5.304 | 1.00 | 0.00 |
| ATOM  | 22 | C    | VALM | 1 | 0.646  | 1.697  | -3.222 | 1.00 | 0.00 |
| ATOM  | 23 | O    | VALM | 1 | 1.649  | 2.392  | -3.064 | 1.00 | 0.00 |
| ATOM  | 24 | N    | PRO  | 2 | 0.302  | 0.650  | -2.426 | 1.00 | 0.00 |
| ATOM  | 25 | CD   | PRO  | 2 | -0.879 | -0.196 | -2.582 | 1.00 | 0.00 |
| ATOM  | 26 | CA   | PRO  | 2 | 1.127  | 0.270  | -1.292 | 1.00 | 0.00 |
| ATOM  | 27 | HA   | PRO  | 2 | 1.440  | 1.083  | -0.802 | 1.00 | 0.00 |
| ATOM  | 28 | CB   | PRO  | 2 | 0.229  | -0.599 | -0.426 | 1.00 | 0.00 |
| ATOM  | 29 | 2HB  | PRO  | 2 | -0.151 | -0.039 | 0.428  | 1.00 | 0.00 |
| ATOM  | 30 | QB   | PRO  | 2 | -0.151 | -0.039 | 0.428  | 1.00 | 0.00 |
| ATOM  | 31 | CG   | PRO  | 2 | -0.907 | -1.054 | -1.328 | 1.00 | 0.00 |
| ATOM  | 32 | 2HG  | PRO  | 2 | -1.865 | -0.951 | -0.817 | 1.00 | 0.00 |
| ATOM  | 33 | QG   | PRO  | 2 | -1.865 | -0.951 | -0.817 | 1.00 | 0.00 |
| ATOM  | 34 | 2HD  | PRO  | 2 | -1.785 | 0.402  | -2.673 | 1.00 | 0.00 |
| ATOM  | 35 | QD   | PRO  | 2 | -1.785 | 0.402  | -2.673 | 1.00 | 0.00 |
| ATOM  | 36 | C    | PRO  | 2 | 2.393  | -0.454 | -1.754 | 1.00 | 0.00 |
| ATOM  | 37 | O    | PRO  | 2 | 2.411  | -1.057 | -2.827 | 1.00 | 0.00 |
| ATOM  | 38 | N    | ILE  | 3 | 3.421  | -0.370 | -0.923 | 1.00 | 0.00 |
| ATOM  | 39 | H    | ILE  | 3 | 3.397  | 0.122  | -0.053 | 1.00 | 0.00 |
| ATOM  | 40 | CA   | ILE  | 3 | 4.688  | -1.010 | -1.233 | 1.00 | 0.00 |
| ATOM  | 41 | HA   | ILE  | 3 | 4.690  | -1.231 | -2.301 | 1.00 | 0.00 |
| ATOM  | 42 | CB   | ILE  | 3 | 5.851  | -0.051 | -0.968 | 1.00 | 0.00 |
| ATOM  | 43 | HB   | ILE  | 3 | 6.555  | -0.546 | -0.298 | 1.00 | 0.00 |
| ATOM  | 44 | QG2  | ILE  | 3 | 6.784  | 0.344  | -2.568 | 1.00 | 0.00 |
| ATOM  | 45 | CG2  | ILE  | 3 | 6.605  | 0.267  | -2.260 | 1.00 | 0.00 |
| ATOM  | 46 | 1HG2 | ILE  | 3 | 6.904  | 1.316  | -2.257 | 1.00 | 0.00 |
| ATOM  | 47 | 2HG2 | ILE  | 3 | 7.491  | -0.363 | -2.330 | 1.00 | 0.00 |
| ATOM  | 48 | 3HG2 | ILE  | 3 | 5.956  | 0.079  | -3.116 | 1.00 | 0.00 |
| ATOM  | 49 | CG1  | ILE  | 3 | 5.367  | 1.215  | -0.259 | 1.00 | 0.00 |
| ATOM  | 50 | 2HG1 | ILE  | 3 | 4.422  | 1.541  | -0.694 | 1.00 | 0.00 |
| ATOM  | 51 | QG1  | ILE  | 3 | 4.422  | 1.541  | -0.694 | 1.00 | 0.00 |
| ATOM  | 52 | QD1  | ILE  | 3 | 5.144  | 0.911  | 1.597  | 1.00 | 0.00 |
| ATOM  | 53 | CD1  | ILE  | 3 | 5.187  | 0.969  | 1.240  | 1.00 | 0.00 |
| ATOM  | 54 | 1HD1 | ILE  | 3 | 4.127  | 1.007  | 1.490  | 1.00 | 0.00 |
| ATOM  | 55 | 2HD1 | ILE  | 3 | 5.585  | -0.011 | 1.498  | 1.00 | 0.00 |
| ATOM  | 56 | 3HD1 | ILE  | 3 | 5.719  | 1.737  | 1.801  | 1.00 | 0.00 |
| ATOM  | 57 | C    | ILE  | 3 | 4.791  | -2.328 | -0.465 | 1.00 | 0.00 |
| ATOM  | 58 | O    | ILE  | 3 | 5.296  | -3.353 | -0.946 | 1.00 | 0.00 |

|      |     |      |      |   |        |        |        |      |      |
|------|-----|------|------|---|--------|--------|--------|------|------|
| ATOM | 59  | N    | PIP  | 4 | 4.300  | -2.300 | 0.760  | 1.00 | 0.00 |
| ATOM | 60  | CE   | PIP  | 4 | 3.709  | -1.111 | 1.335  | 1.00 | 0.00 |
| ATOM | 61  | CA   | PIP  | 4 | 4.328  | -3.457 | 1.641  | 1.00 | 0.00 |
| ATOM | 62  | HA   | PIP  | 4 | 5.318  | -3.913 | 1.676  | 1.00 | 0.00 |
| ATOM | 63  | CB   | PIP  | 4 | 3.949  | -3.082 | 3.085  | 1.00 | 0.00 |
| ATOM | 64  | 2HB  | PIP  | 4 | 3.980  | -3.972 | 3.713  | 1.00 | 0.00 |
| ATOM | 65  | 3HB  | PIP  | 4 | 4.654  | -2.344 | 3.467  | 1.00 | 0.00 |
| ATOM | 66  | QB   | PIP  | 4 | 4.317  | -3.158 | 3.590  | 1.00 | 0.00 |
| ATOM | 67  | CG   | PIP  | 4 | 2.527  | -2.490 | 3.107  | 1.00 | 0.00 |
| ATOM | 68  | 2HG  | PIP  | 4 | 2.258  | -2.224 | 4.129  | 1.00 | 0.00 |
| ATOM | 69  | 3HG  | PIP  | 4 | 1.820  | -3.228 | 2.726  | 1.00 | 0.00 |
| ATOM | 70  | QG   | PIP  | 4 | 2.039  | -2.726 | 3.427  | 1.00 | 0.00 |
| ATOM | 71  | CD   | PIP  | 4 | 2.527  | -1.509 | 2.238  | 1.00 | 0.00 |
| ATOM | 72  | 2HD  | PIP  | 4 | 2.081  | -0.613 | 2.670  | 1.00 | 0.00 |
| ATOM | 73  | 3HD  | PIP  | 4 | 1.780  | -2.036 | 1.647  | 1.00 | 0.00 |
| ATOM | 74  | QD   | PIP  | 4 | 1.930  | -1.325 | 2.158  | 1.00 | 0.00 |
| ATOM | 75  | 1HE  | PIP  | 4 | 4.456  | -0.582 | 1.926  | 1.00 | 0.00 |
| ATOM | 76  | 2HE  | PIP  | 4 | 3.352  | -0.461 | 0.535  | 1.00 | 0.00 |
| ATOM | 77  | QE   | PIP  | 4 | 3.904  | -0.522 | 1.231  | 1.00 | 0.00 |
| ATOM | 78  | C    | PIP  | 4 | 3.342  | -4.544 | 1.180  | 1.00 | 0.00 |
| ATOM | 79  | O    | PIP  | 4 | 2.715  | -4.288 | 0.154  | 1.00 | 0.00 |
| ATOM | 80  | N    | ALA  | 5 | 3.221  | -5.668 | 1.873  | 1.00 | 0.00 |
| ATOM | 81  | H    | ALA  | 5 | 3.736  | -5.869 | 2.706  | 1.00 | 0.00 |
| ATOM | 82  | CA   | ALA  | 5 | 2.304  | -6.713 | 1.451  | 1.00 | 0.00 |
| ATOM | 83  | HA   | ALA  | 5 | 2.746  | -7.213 | 0.588  | 1.00 | 0.00 |
| ATOM | 84  | QB   | ALA  | 5 | 2.097  | -7.974 | 2.848  | 1.00 | 0.00 |
| ATOM | 85  | CB   | ALA  | 5 | 2.137  | -7.731 | 2.579  | 1.00 | 0.00 |
| ATOM | 86  | 1HB  | ALA  | 5 | 2.220  | -8.740 | 2.174  | 1.00 | 0.00 |
| ATOM | 87  | 2HB  | ALA  | 5 | 2.913  | -7.575 | 3.329  | 1.00 | 0.00 |
| ATOM | 88  | 3HB  | ALA  | 5 | 1.157  | -7.605 | 3.040  | 1.00 | 0.00 |
| ATOM | 89  | C    | ALA  | 5 | 0.976  | -6.080 | 1.033  | 1.00 | 0.00 |
| ATOM | 90  | O    | ALA  | 5 | 0.616  | -5.007 | 1.515  | 1.00 | 0.00 |
| ATOM | 91  | N    | PRO  | 6 | 0.262  | -6.790 | 0.119  | 1.00 | 0.00 |
| ATOM | 92  | CD   | PRO  | 6 | 0.655  | -8.065 | -0.473 | 1.00 | 0.00 |
| ATOM | 93  | CA   | PRO  | 6 | -1.020 | -6.310 | -0.368 | 1.00 | 0.00 |
| ATOM | 94  | HA   | PRO  | 6 | -0.978 | -5.326 | -0.543 | 1.00 | 0.00 |
| ATOM | 95  | CB   | PRO  | 6 | -1.277 | -7.098 | -1.642 | 1.00 | 0.00 |
| ATOM | 96  | 2HB  | PRO  | 6 | -1.061 | -6.496 | -2.524 | 1.00 | 0.00 |
| ATOM | 97  | QB   | PRO  | 6 | -1.061 | -6.496 | -2.524 | 1.00 | 0.00 |
| ATOM | 98  | CG   | PRO  | 6 | -0.365 | -8.312 | -1.573 | 1.00 | 0.00 |
| ATOM | 99  | 2HG  | PRO  | 6 | 0.135  | -8.468 | -2.528 | 1.00 | 0.00 |
| ATOM | 100 | QG   | PRO  | 6 | 0.135  | -8.468 | -2.528 | 1.00 | 0.00 |
| ATOM | 101 | 2HD  | PRO  | 6 | 1.667  | -8.020 | -0.875 | 1.00 | 0.00 |
| ATOM | 102 | QD   | PRO  | 6 | 1.667  | -8.020 | -0.875 | 1.00 | 0.00 |
| ATOM | 103 | C    | PRO  | 6 | -2.113 | -6.502 | 0.685  | 1.00 | 0.00 |
| ATOM | 104 | O    | PRO  | 6 | -2.503 | -7.615 | 1.056  | 1.00 | 0.00 |
| ATOM | 105 | N    | THRM | 7 | -2.618 | -5.384 | 1.175  | 1.00 | 0.00 |
| ATOM | 106 | QB   | THRM | 7 | -3.938 | -5.583 | 2.446  | 1.00 | 0.00 |
| ATOM | 107 | CN   | THRM | 7 | -3.678 | -5.544 | 2.196  | 1.00 | 0.00 |
| ATOM | 108 | 1HNB | THRM | 7 | -3.861 | -6.605 | 2.367  | 1.00 | 0.00 |
| ATOM | 109 | 2HNB | THRM | 7 | -3.360 | -5.075 | 3.127  | 1.00 | 0.00 |
| ATOM | 110 | 3HNB | THRM | 7 | -4.595 | -5.070 | 1.845  | 1.00 | 0.00 |
| ATOM | 111 | CA   | THRM | 7 | -2.158 | -4.071 | 0.737  | 1.00 | 0.00 |
| ATOM | 112 | HA   | THRM | 7 | -1.053 | -4.078 | 0.713  | 1.00 | 0.00 |
| ATOM | 113 | CB   | THRM | 7 | -2.689 | -3.753 | -0.703 | 1.00 | 0.00 |
| ATOM | 114 | HB   | THRM | 7 | -1.819 | -3.701 | -1.392 | 1.00 | 0.00 |
| ATOM | 115 | QG2  | THRM | 7 | -3.990 | -5.019 | -1.443 | 1.00 | 0.00 |
| ATOM | 116 | OG1  | THRM | 7 | -3.360 | -2.500 | -0.721 | 1.00 | 0.00 |
| ATOM | 117 | 1HG  | THRM | 7 | -3.411 | -2.238 | -1.645 | 1.00 | 0.00 |

|      |     |      |      |    |        |        |        |      |      |
|------|-----|------|------|----|--------|--------|--------|------|------|
| ATOM | 118 | CG2  | THRM | 7  | -3.714 | -4.748 | -1.289 | 1.00 | 0.00 |
| ATOM | 119 | 1HG2 | THRM | 7  | -3.367 | -5.796 | -1.213 | 1.00 | 0.00 |
| ATOM | 120 | 2HG2 | THRM | 7  | -4.685 | -4.716 | -0.760 | 1.00 | 0.00 |
| ATOM | 121 | 3HG2 | THRM | 7  | -3.918 | -4.546 | -2.357 | 1.00 | 0.00 |
| ATOM | 122 | C    | THRM | 7  | -2.581 | -2.996 | 1.710  | 1.00 | 0.00 |
| ATOM | 123 | O    | THRM | 7  | -3.396 | -3.265 | 2.592  | 1.00 | 0.00 |
| ATOM | 124 | N    | VAL  | 8  | -2.027 | -1.805 | 1.538  | 1.00 | 0.00 |
| ATOM | 125 | H    | VAL  | 8  | -1.365 | -1.595 | 0.818  | 1.00 | 0.00 |
| ATOM | 126 | CA   | VAL  | 8  | -2.356 | -0.693 | 2.413  | 1.00 | 0.00 |
| ATOM | 127 | HA   | VAL  | 8  | -3.372 | -0.850 | 2.776  | 1.00 | 0.00 |
| ATOM | 128 | CB   | VAL  | 8  | -1.418 | -0.681 | 3.621  | 1.00 | 0.00 |
| ATOM | 129 | HB   | VAL  | 8  | -1.202 | 0.358  | 3.868  | 1.00 | 0.00 |
| ATOM | 130 | QG1  | VAL  | 8  | -2.241 | -1.480 | 5.127  | 1.00 | 0.00 |
| ATOM | 131 | QG2  | VAL  | 8  | 0.223  | -1.534 | 3.213  | 1.00 | 0.00 |
| ATOM | 132 | CG1  | VAL  | 8  | -2.083 | -1.327 | 4.838  | 1.00 | 0.00 |
| ATOM | 133 | 1HG1 | VAL  | 8  | -1.937 | -0.692 | 5.711  | 1.00 | 0.00 |
| ATOM | 134 | 2HG1 | VAL  | 8  | -3.150 | -1.445 | 4.649  | 1.00 | 0.00 |
| ATOM | 135 | 3HG1 | VAL  | 8  | -1.636 | -2.304 | 5.021  | 1.00 | 0.00 |
| ATOM | 136 | CG2  | VAL  | 8  | -0.092 | -1.370 | 3.291  | 1.00 | 0.00 |
| ATOM | 137 | 1HG2 | VAL  | 8  | 0.678  | -1.025 | 3.982  | 1.00 | 0.00 |
| ATOM | 138 | 2HG2 | VAL  | 8  | -0.209 | -2.450 | 3.388  | 1.00 | 0.00 |
| ATOM | 139 | 3HG2 | VAL  | 8  | 0.201  | -1.126 | 2.269  | 1.00 | 0.00 |
| ATOM | 140 | QQG  | VAL  | 8  | -1.009 | -1.507 | 4.170  | 1.00 | 0.00 |
| ATOM | 141 | C    | VAL  | 8  | -2.315 | 0.610  | 1.612  | 1.00 | 0.00 |
| ATOM | 142 | O    | VAL  | 8  | -1.916 | 0.670  | 0.442  | 1.00 | 0.00 |
| ATOM | 143 | N    | THRM | 9  | -2.740 | 1.678  | 2.261  | 1.00 | 0.00 |
| ATOM | 144 | QB   | THRM | 9  | -3.298 | 1.400  | 3.996  | 1.00 | 0.00 |
| ATOM | 145 | CN   | THRM | 9  | -3.188 | 1.454  | 3.654  | 1.00 | 0.00 |
| ATOM | 146 | 1HNB | THRM | 9  | -3.081 | 0.399  | 3.906  | 1.00 | 0.00 |
| ATOM | 147 | 2HNB | THRM | 9  | -2.579 | 2.052  | 4.331  | 1.00 | 0.00 |
| ATOM | 148 | 3HNB | THRM | 9  | -4.233 | 1.747  | 3.752  | 1.00 | 0.00 |
| ATOM | 149 | CA   | THRM | 9  | -2.768 | 3.000  | 1.642  | 1.00 | 0.00 |
| ATOM | 150 | HA   | THRM | 9  | -2.488 | 2.892  | 0.578  | 1.00 | 0.00 |
| ATOM | 151 | CB   | THRM | 9  | -4.205 | 3.617  | 1.726  | 1.00 | 0.00 |
| ATOM | 152 | HB   | THRM | 9  | -4.296 | 4.159  | 2.691  | 1.00 | 0.00 |
| ATOM | 153 | QG2  | THRM | 9  | -4.712 | 4.840  | 0.281  | 1.00 | 0.00 |
| ATOM | 154 | OG1  | THRM | 9  | -5.190 | 2.593  | 1.684  | 1.00 | 0.00 |
| ATOM | 155 | 1HG  | THRM | 9  | -5.878 | 2.859  | 2.301  | 1.00 | 0.00 |
| ATOM | 156 | CG2  | THRM | 9  | -4.602 | 4.582  | 0.588  | 1.00 | 0.00 |
| ATOM | 157 | 1HG2 | THRM | 9  | -4.943 | 4.043  | -0.315 | 1.00 | 0.00 |
| ATOM | 158 | 2HG2 | THRM | 9  | -5.437 | 5.249  | 0.872  | 1.00 | 0.00 |
| ATOM | 159 | 3HG2 | THRM | 9  | -3.757 | 5.230  | 0.284  | 1.00 | 0.00 |
| ATOM | 160 | C    | THRM | 9  | -1.754 | 3.918  | 2.283  | 1.00 | 0.00 |
| ATOM | 161 | O    | THRM | 9  | -2.085 | 4.851  | 2.988  | 1.00 | 0.00 |
| ATOM | 162 | N    | VALM | 10 | -0.487 | 3.646  | 2.032  | 1.00 | 0.00 |
| ATOM | 163 | QB   | VALM | 10 | -0.173 | 2.192  | 0.943  | 1.00 | 0.00 |
| ATOM | 164 | CN   | VALM | 10 | -0.235 | 2.480  | 1.158  | 1.00 | 0.00 |
| ATOM | 165 | 1HNB | VALM | 10 | -0.888 | 2.529  | 0.287  | 1.00 | 0.00 |
| ATOM | 166 | 2HNB | VALM | 10 | 0.806  | 2.486  | 0.833  | 1.00 | 0.00 |
| ATOM | 167 | 3HNB | VALM | 10 | -0.436 | 1.561  | 1.710  | 1.00 | 0.00 |
| ATOM | 168 | CA   | VALM | 10 | 0.600  | 4.449  | 2.585  | 1.00 | 0.00 |
| ATOM | 169 | HA   | VALM | 10 | 0.258  | 5.495  | 2.678  | 1.00 | 0.00 |
| ATOM | 170 | CB   | VALM | 10 | 1.001  | 3.900  | 4.012  | 1.00 | 0.00 |
| ATOM | 171 | HB   | VALM | 10 | 1.956  | 3.346  | 3.893  | 1.00 | 0.00 |
| ATOM | 172 | QG1  | VALM | 10 | 1.299  | 5.259  | 5.415  | 1.00 | 0.00 |
| ATOM | 173 | QG2  | VALM | 10 | -0.302 | 2.653  | 4.783  | 1.00 | 0.00 |
| ATOM | 174 | CG1  | VALM | 10 | 1.243  | 4.966  | 5.117  | 1.00 | 0.00 |
| ATOM | 175 | 1HG1 | VALM | 10 | 2.244  | 4.874  | 5.581  | 1.00 | 0.00 |
| ATOM | 176 | 2HG1 | VALM | 10 | 1.155  | 5.999  | 4.731  | 1.00 | 0.00 |

|      |     |      |      |    |        |       |        |      |      |
|------|-----|------|------|----|--------|-------|--------|------|------|
| ATOM | 177 | 3HG1 | VALM | 10 | 0.500  | 4.904 | 5.934  | 1.00 | 0.00 |
| ATOM | 178 | CG2  | VALM | 10 | -0.027 | 2.913 | 4.615  | 1.00 | 0.00 |
| ATOM | 179 | 1HG2 | VALM | 10 | -0.398 | 2.185 | 3.870  | 1.00 | 0.00 |
| ATOM | 180 | 2HG2 | VALM | 10 | 0.402  | 2.334 | 5.452  | 1.00 | 0.00 |
| ATOM | 181 | 3HG2 | VALM | 10 | -0.910 | 3.439 | 5.028  | 1.00 | 0.00 |
| ATOM | 182 | QOG  | VALM | 10 | 0.499  | 3.956 | 5.099  | 1.00 | 0.00 |
| ATOM | 183 | C    | VALM | 10 | 1.793  | 4.456 | 1.658  | 1.00 | 0.00 |
| ATOM | 184 | O    | VALM | 10 | 2.882  | 3.969 | 1.988  | 1.00 | 0.00 |
| ATOM | 185 | N    | ILEM | 11 | 1.604  | 5.011 | 0.476  | 1.00 | 0.00 |
| ATOM | 186 | QB   | ILEM | 11 | -0.084 | 5.683 | 0.160  | 1.00 | 0.00 |
| ATOM | 187 | CN   | ILEM | 11 | 0.249  | 5.550 | 0.222  | 1.00 | 0.00 |
| ATOM | 188 | 1HNB | ILEM | 11 | -0.379 | 5.384 | 1.097  | 1.00 | 0.00 |
| ATOM | 189 | 2HNB | ILEM | 11 | 0.315  | 6.619 | 0.020  | 1.00 | 0.00 |
| ATOM | 190 | 3HNB | ILEM | 11 | -0.188 | 5.046 | -0.639 | 1.00 | 0.00 |
| ATOM | 191 | CA   | ILEM | 11 | 2.667  | 5.088 | -0.521 | 1.00 | 0.00 |
| ATOM | 192 | HA   | ILEM | 11 | 2.266  | 5.633 | -1.396 | 1.00 | 0.00 |
| ATOM | 193 | CB   | ILEM | 11 | 3.918  | 5.886 | 0.031  | 1.00 | 0.00 |
| ATOM | 194 | HB   | ILEM | 11 | 3.726  | 6.072 | 1.109  | 1.00 | 0.00 |
| ATOM | 195 | QG2  | ILEM | 11 | 5.613  | 4.864 | -0.101 | 1.00 | 0.00 |
| ATOM | 196 | CG2  | ILEM | 11 | 5.247  | 5.077 | -0.077 | 1.00 | 0.00 |
| ATOM | 197 | 1HG2 | ILEM | 11 | 6.139  | 5.728 | -0.049 | 1.00 | 0.00 |
| ATOM | 198 | 2HG2 | ILEM | 11 | 5.397  | 4.372 | 0.759  | 1.00 | 0.00 |
| ATOM | 199 | 3HG2 | ILEM | 11 | 5.303  | 4.492 | -1.014 | 1.00 | 0.00 |
| ATOM | 200 | CG1  | ILEM | 11 | 4.145  | 7.283 | -0.633 | 1.00 | 0.00 |
| ATOM | 201 | 2HG1 | ILEM | 11 | 3.857  | 7.236 | -1.700 | 1.00 | 0.00 |
| ATOM | 202 | QG1  | ILEM | 11 | 3.857  | 7.236 | -1.700 | 1.00 | 0.00 |
| ATOM | 203 | QD1  | ILEM | 11 | 3.127  | 8.762 | 0.137  | 1.00 | 0.00 |
| ATOM | 204 | CD1  | ILEM | 11 | 3.341  | 8.453 | -0.030 | 1.00 | 0.00 |
| ATOM | 205 | 1HD1 | ILEM | 11 | 2.901  | 8.175 | 0.945  | 1.00 | 0.00 |
| ATOM | 206 | 2HD1 | ILEM | 11 | 3.978  | 9.341 | 0.143  | 1.00 | 0.00 |
| ATOM | 207 | 3HD1 | ILEM | 11 | 2.503  | 8.768 | -0.676 | 1.00 | 0.00 |
| ATOM | 208 | C    | ILEM | 11 | 3.050  | 3.713 | -1.012 | 1.00 | 0.00 |
| ATOM | 209 | O    | ILEM | 11 | 2.799  | 2.689 | -0.360 | 1.00 | 0.00 |
| ATOM | 210 | N    | PIPO | 12 | 3.669  | 3.666 | -2.176 | 1.00 | 0.00 |
| ATOM | 211 | CE   | PIPO | 12 | 4.100  | 2.423 | -2.779 | 1.00 | 0.00 |
| ATOM | 212 | CA   | PIPO | 12 | 3.985  | 4.861 | -2.943 | 1.00 | 0.00 |
| ATOM | 213 | HA   | PIPO | 12 | 4.466  | 5.619 | -2.325 | 1.00 | 0.00 |
| ATOM | 214 | CB   | PIPO | 12 | 4.939  | 4.551 | -4.112 | 1.00 | 0.00 |
| ATOM | 215 | 2HB  | PIPO | 12 | 5.152  | 5.468 | -4.661 | 1.00 | 0.00 |
| ATOM | 216 | 3HB  | PIPO | 12 | 5.869  | 4.137 | -3.722 | 1.00 | 0.00 |
| ATOM | 217 | QB   | PIPO | 12 | 5.510  | 4.802 | -4.191 | 1.00 | 0.00 |
| ATOM | 218 | CG   | PIPO | 12 | 4.281  | 3.528 | -5.056 | 1.00 | 0.00 |
| ATOM | 219 | 2HG  | PIPO | 12 | 4.956  | 3.310 | -5.883 | 1.00 | 0.00 |
| ATOM | 220 | 3HG  | PIPO | 12 | 3.351  | 3.941 | -5.448 | 1.00 | 0.00 |
| ATOM | 221 | QG   | PIPO | 12 | 4.153  | 3.625 | -5.665 | 1.00 | 0.00 |
| ATOM | 222 | CD   | PIPO | 12 | 3.937  | 2.509 | -4.308 | 1.00 | 0.00 |
| ATOM | 223 | 2HD  | PIPO | 12 | 4.261  | 1.572 | -4.762 | 1.00 | 0.00 |
| ATOM | 224 | 3HD  | PIPO | 12 | 2.890  | 2.688 | -4.553 | 1.00 | 0.00 |
| ATOM | 225 | QD   | PIPO | 12 | 3.575  | 2.130 | -4.658 | 1.00 | 0.00 |
| ATOM | 226 | 1HE  | PIPO | 12 | 5.146  | 2.244 | -2.536 | 1.00 | 0.00 |
| ATOM | 227 | 2HE  | PIPO | 12 | 3.493  | 1.603 | -2.394 | 1.00 | 0.00 |
| ATOM | 228 | QE   | PIPO | 12 | 4.320  | 1.924 | -2.465 | 1.00 | 0.00 |
| ATOM | 229 | C    | PIPO | 12 | 2.721  | 5.499 | -3.544 | 1.00 | 0.00 |
| ATOM | 230 | O    | PIPO | 12 | 2.560  | 6.717 | -3.398 | 1.00 | 0.00 |
| ATOM | 231 | O1'  | PHEO | 13 | 1.852  | 4.753 | -4.201 | 1.00 | 0.00 |
| ATOM | 232 | CA   | PHEO | 13 | 0.453  | 5.142 | -4.346 | 1.00 | 0.00 |
| ATOM | 233 | HA   | PHEO | 13 | 0.375  | 6.057 | -4.963 | 1.00 | 0.00 |
| ATOM | 234 | CB   | PHEO | 13 | -0.148 | 5.402 | -2.931 | 1.00 | 0.00 |
| ATOM | 235 | 2HB  | PHEO | 13 | 0.650  | 5.763 | -2.253 | 1.00 | 0.00 |



Supplementary Material for Organic & Biomolecular Chemistry  
 This journal is © The Royal Society of Chemistry 2006

|         |     |      |      |    |        |        |        |      |      |
|---------|-----|------|------|----|--------|--------|--------|------|------|
| ATOM    | 236 | QB   | PHEO | 13 | 0.650  | 5.763  | -2.253 | 1.00 | 0.00 |
| ATOM    | 237 | QD   | PHEO | 13 | -1.450 | 6.500  | -2.823 | 1.00 | 0.00 |
| ATOM    | 238 | QE   | PHEO | 13 | -3.297 | 8.113  | -2.595 | 1.00 | 0.00 |
| ATOM    | 239 | QR   | PHEO | 13 | -2.743 | 7.630  | -2.663 | 1.00 | 0.00 |
| ATOM    | 240 | CG   | PHEO | 13 | -1.327 | 6.385  | -2.858 | 1.00 | 0.00 |
| ATOM    | 241 | CD1  | PHEO | 13 | -1.101 | 7.751  | -3.059 | 1.00 | 0.00 |
| ATOM    | 242 | 1HD  | PHEO | 13 | -0.104 | 8.112  | -3.281 | 1.00 | 0.00 |
| ATOM    | 243 | CE1  | PHEO | 13 | -2.142 | 8.663  | -2.917 | 1.00 | 0.00 |
| ATOM    | 244 | 1HE  | PHEO | 13 | -1.949 | 9.720  | -3.045 | 1.00 | 0.00 |
| ATOM    | 245 | CZ   | PHEO | 13 | -3.419 | 8.214  | -2.593 | 1.00 | 0.00 |
| ATOM    | 246 | HZ   | PHEO | 13 | -4.224 | 8.924  | -2.477 | 1.00 | 0.00 |
| ATOM    | 247 | CE2  | PHEO | 13 | -3.654 | 6.853  | -2.404 | 1.00 | 0.00 |
| ATOM    | 248 | 2HE  | PHEO | 13 | -4.644 | 6.506  | -2.144 | 1.00 | 0.00 |
| ATOM    | 249 | CD2  | PHEO | 13 | -2.611 | 5.940  | -2.534 | 1.00 | 0.00 |
| ATOM    | 250 | 2HD  | PHEO | 13 | -2.796 | 4.888  | -2.365 | 1.00 | 0.00 |
| ATOM    | 251 | C    | PHEO | 13 | -0.349 | 4.043  | -5.000 | 1.00 | 0.00 |
| ATOM    | 252 | O    | PHEO | 13 | -1.470 | 4.262  | -5.539 | 1.00 | 0.00 |
| TER     |     |      |      |    |        |        |        |      |      |
| ENDMDL  |     |      |      |    |        |        |        |      |      |
| MODEL 5 |     |      |      |    |        |        |        |      |      |
| ATOM    | 1   | N    | VALM | 1  | -0.644 | 3.388  | -4.507 | 1.00 | 0.00 |
| ATOM    | 2   | QB   | VALM | 1  | -2.361 | 4.060  | -4.454 | 1.00 | 0.00 |
| ATOM    | 3   | CN   | VALM | 1  | -2.022 | 3.927  | -4.465 | 1.00 | 0.00 |
| ATOM    | 4   | 1HNB | VALM | 1  | -2.681 | 3.288  | -5.052 | 1.00 | 0.00 |
| ATOM    | 5   | 2HNB | VALM | 1  | -2.370 | 3.955  | -3.432 | 1.00 | 0.00 |
| ATOM    | 6   | 3HNB | VALM | 1  | -2.031 | 4.936  | -4.879 | 1.00 | 0.00 |
| ATOM    | 7   | CA   | VALM | 1  | -0.369 | 1.959  | -4.389 | 1.00 | 0.00 |
| ATOM    | 8   | HA   | VALM | 1  | -1.312 | 1.432  | -4.159 | 1.00 | 0.00 |
| ATOM    | 9   | CB   | VALM | 1  | 0.217  | 1.412  | -5.750 | 1.00 | 0.00 |
| ATOM    | 10  | HB   | VALM | 1  | 1.022  | 2.111  | -6.065 | 1.00 | 0.00 |
| ATOM    | 11  | QG1  | VALM | 1  | 1.025  | -0.391 | -5.685 | 1.00 | 0.00 |
| ATOM    | 12  | QG2  | VALM | 1  | -1.089 | 1.337  | -7.212 | 1.00 | 0.00 |
| ATOM    | 13  | CG1  | VALM | 1  | 0.857  | -0.004 | -5.706 | 1.00 | 0.00 |
| ATOM    | 14  | 1HG1 | VALM | 1  | 1.530  | -0.192 | -6.564 | 1.00 | 0.00 |
| ATOM    | 15  | 2HG1 | VALM | 1  | 1.447  | -0.170 | -4.785 | 1.00 | 0.00 |
| ATOM    | 16  | 3HG1 | VALM | 1  | 0.098  | -0.810 | -5.706 | 1.00 | 0.00 |
| ATOM    | 17  | CG2  | VALM | 1  | -0.816 | 1.358  | -6.901 | 1.00 | 0.00 |
| ATOM    | 18  | 1HG2 | VALM | 1  | -1.586 | 2.145  | -6.811 | 1.00 | 0.00 |
| ATOM    | 19  | 2HG2 | VALM | 1  | -0.338 | 1.480  | -7.889 | 1.00 | 0.00 |
| ATOM    | 20  | 3HG2 | VALM | 1  | -1.343 | 0.384  | -6.935 | 1.00 | 0.00 |
| ATOM    | 21  | QQG  | VALM | 1  | -0.032 | 0.473  | -6.448 | 1.00 | 0.00 |
| ATOM    | 22  | C    | VALM | 1  | 0.580  | 1.685  | -3.247 | 1.00 | 0.00 |
| ATOM    | 23  | O    | VALM | 1  | 1.566  | 2.404  | -3.091 | 1.00 | 0.00 |
| ATOM    | 24  | N    | PRO  | 2  | 0.264  | 0.629  | -2.450 | 1.00 | 0.00 |
| ATOM    | 25  | CD   | PRO  | 2  | -0.894 | -0.246 | -2.605 | 1.00 | 0.00 |
| ATOM    | 26  | CA   | PRO  | 2  | 1.103  | 0.266  | -1.319 | 1.00 | 0.00 |
| ATOM    | 27  | HA   | PRO  | 2  | 1.397  | 1.087  | -0.830 | 1.00 | 0.00 |
| ATOM    | 28  | CB   | PRO  | 2  | 0.229  | -0.625 | -0.453 | 1.00 | 0.00 |
| ATOM    | 29  | 2HB  | PRO  | 2  | -0.162 | -0.076 | 0.403  | 1.00 | 0.00 |
| ATOM    | 30  | QB   | PRO  | 2  | -0.162 | -0.076 | 0.403  | 1.00 | 0.00 |
| ATOM    | 31  | CG   | PRO  | 2  | -0.898 | -1.107 | -1.352 | 1.00 | 0.00 |
| ATOM    | 32  | 2HG  | PRO  | 2  | -1.856 | -1.029 | -0.838 | 1.00 | 0.00 |
| ATOM    | 33  | QG   | PRO  | 2  | -1.856 | -1.029 | -0.838 | 1.00 | 0.00 |
| ATOM    | 34  | 2HD  | PRO  | 2  | -1.815 | 0.329  | -2.693 | 1.00 | 0.00 |
| ATOM    | 35  | QD   | PRO  | 2  | -1.815 | 0.329  | -2.693 | 1.00 | 0.00 |
| ATOM    | 36  | C    | PRO  | 2  | 2.385  | -0.425 | -1.787 | 1.00 | 0.00 |
| ATOM    | 37  | O    | PRO  | 2  | 2.442  | -0.951 | -2.897 | 1.00 | 0.00 |
| ATOM    | 38  | N    | ILE  | 3  | 3.383  | -0.401 | -0.915 | 1.00 | 0.00 |
| ATOM    | 39  | H    | ILE  | 3  | 3.329  | 0.029  | -0.015 | 1.00 | 0.00 |

|      |    |      |     |   |        |        |        |      |      |
|------|----|------|-----|---|--------|--------|--------|------|------|
| ATOM | 40 | CA   | ILE | 3 | 4.661  | -1.018 | -1.224 | 1.00 | 0.00 |
| ATOM | 41 | HA   | ILE | 3 | 4.672  | -1.230 | -2.294 | 1.00 | 0.00 |
| ATOM | 42 | CB   | ILE | 3 | 5.808  | -0.046 | -0.943 | 1.00 | 0.00 |
| ATOM | 43 | HB   | ILE | 3 | 6.506  | -0.529 | -0.259 | 1.00 | 0.00 |
| ATOM | 44 | QG2  | ILE | 3 | 6.765  | 0.350  | -2.528 | 1.00 | 0.00 |
| ATOM | 45 | CG2  | ILE | 3 | 6.582  | 0.275  | -2.224 | 1.00 | 0.00 |
| ATOM | 46 | 1HG2 | ILE | 3 | 7.300  | -0.521 | -2.424 | 1.00 | 0.00 |
| ATOM | 47 | 2HG2 | ILE | 3 | 5.886  | 0.353  | -3.059 | 1.00 | 0.00 |
| ATOM | 48 | 3HG2 | ILE | 3 | 7.111  | 1.220  | -2.102 | 1.00 | 0.00 |
| ATOM | 49 | CG1  | ILE | 3 | 5.297  | 1.219  | -0.251 | 1.00 | 0.00 |
| ATOM | 50 | 2HG1 | ILE | 3 | 4.343  | 1.516  | -0.686 | 1.00 | 0.00 |
| ATOM | 51 | QG1  | ILE | 3 | 4.343  | 1.516  | -0.686 | 1.00 | 0.00 |
| ATOM | 52 | QD1  | ILE | 3 | 5.090  | 0.937  | 1.610  | 1.00 | 0.00 |
| ATOM | 53 | CD1  | ILE | 3 | 5.130  | 0.991  | 1.252  | 1.00 | 0.00 |
| ATOM | 54 | 1HD1 | ILE | 3 | 4.069  | 0.985  | 1.504  | 1.00 | 0.00 |
| ATOM | 55 | 2HD1 | ILE | 3 | 5.573  | 0.034  | 1.526  | 1.00 | 0.00 |
| ATOM | 56 | 3HD1 | ILE | 3 | 5.628  | 1.792  | 1.799  | 1.00 | 0.00 |
| ATOM | 57 | C    | ILE | 3 | 4.779  | -2.344 | -0.468 | 1.00 | 0.00 |
| ATOM | 58 | O    | ILE | 3 | 5.273  | -3.365 | -0.968 | 1.00 | 0.00 |
| ATOM | 59 | N    | PIP | 4 | 4.313  | -2.324 | 0.766  | 1.00 | 0.00 |
| ATOM | 60 | CE   | PIP | 4 | 3.735  | -1.139 | 1.361  | 1.00 | 0.00 |
| ATOM | 61 | CA   | PIP | 4 | 4.358  | -3.488 | 1.638  | 1.00 | 0.00 |
| ATOM | 62 | HA   | PIP | 4 | 5.349  | -3.943 | 1.648  | 1.00 | 0.00 |
| ATOM | 63 | CB   | PIP | 4 | 4.009  | -3.123 | 3.093  | 1.00 | 0.00 |
| ATOM | 64 | 2HB  | PIP | 4 | 4.053  | -4.017 | 3.713  | 1.00 | 0.00 |
| ATOM | 65 | 3HB  | PIP | 4 | 4.723  | -2.388 | 3.464  | 1.00 | 0.00 |
| ATOM | 66 | QB   | PIP | 4 | 4.388  | -3.203 | 3.588  | 1.00 | 0.00 |
| ATOM | 67 | CG   | PIP | 4 | 2.588  | -2.531 | 3.147  | 1.00 | 0.00 |
| ATOM | 68 | 2HG  | PIP | 4 | 2.341  | -2.272 | 4.177  | 1.00 | 0.00 |
| ATOM | 69 | 3HG  | PIP | 4 | 1.874  | -3.265 | 2.776  | 1.00 | 0.00 |
| ATOM | 70 | QG   | PIP | 4 | 2.108  | -2.769 | 3.476  | 1.00 | 0.00 |
| ATOM | 71 | CD   | PIP | 4 | 2.571  | -1.543 | 2.286  | 1.00 | 0.00 |
| ATOM | 72 | 2HD  | PIP | 4 | 2.135  | -0.650 | 2.734  | 1.00 | 0.00 |
| ATOM | 73 | 3HD  | PIP | 4 | 1.810  | -2.066 | 1.706  | 1.00 | 0.00 |
| ATOM | 74 | QD   | PIP | 4 | 1.973  | -1.358 | 2.220  | 1.00 | 0.00 |
| ATOM | 75 | 1HE  | PIP | 4 | 4.494  | -0.615 | 1.942  | 1.00 | 0.00 |
| ATOM | 76 | 2HE  | PIP | 4 | 3.361  | -0.482 | 0.575  | 1.00 | 0.00 |
| ATOM | 77 | QE   | PIP | 4 | 3.928  | -0.548 | 1.258  | 1.00 | 0.00 |
| ATOM | 78 | C    | PIP | 4 | 3.363  | -4.571 | 1.190  | 1.00 | 0.00 |
| ATOM | 79 | O    | PIP | 4 | 2.705  | -4.300 | 0.186  | 1.00 | 0.00 |
| ATOM | 80 | N    | ALA | 5 | 3.267  | -5.705 | 1.867  | 1.00 | 0.00 |
| ATOM | 81 | H    | ALA | 5 | 3.806  | -5.917 | 2.682  | 1.00 | 0.00 |
| ATOM | 82 | CA   | ALA | 5 | 2.340  | -6.746 | 1.456  | 1.00 | 0.00 |
| ATOM | 83 | HA   | ALA | 5 | 2.772  | -7.251 | 0.591  | 1.00 | 0.00 |
| ATOM | 84 | QB   | ALA | 5 | 2.139  | -8.003 | 2.858  | 1.00 | 0.00 |
| ATOM | 85 | CB   | ALA | 5 | 2.178  | -7.762 | 2.589  | 1.00 | 0.00 |
| ATOM | 86 | 1HB  | ALA | 5 | 1.117  | -7.938 | 2.769  | 1.00 | 0.00 |
| ATOM | 87 | 2HB  | ALA | 5 | 2.659  | -8.699 | 2.309  | 1.00 | 0.00 |
| ATOM | 88 | 3HB  | ALA | 5 | 2.641  | -7.372 | 3.495  | 1.00 | 0.00 |
| ATOM | 89 | C    | ALA | 5 | 1.010  | -6.108 | 1.049  | 1.00 | 0.00 |
| ATOM | 90 | O    | ALA | 5 | 0.663  | -5.031 | 1.528  | 1.00 | 0.00 |
| ATOM | 91 | N    | PRO | 6 | 0.284  | -6.820 | 0.146  | 1.00 | 0.00 |
| ATOM | 92 | CD   | PRO | 6 | 0.664  | -8.100 | -0.443 | 1.00 | 0.00 |
| ATOM | 93 | CA   | PRO | 6 | -1.000 | -6.334 | -0.329 | 1.00 | 0.00 |
| ATOM | 94 | HA   | PRO | 6 | -0.955 | -5.353 | -0.511 | 1.00 | 0.00 |
| ATOM | 95 | CB   | PRO | 6 | -1.276 | -7.128 | -1.596 | 1.00 | 0.00 |
| ATOM | 96 | 2HB  | PRO | 6 | -1.064 | -6.532 | -2.484 | 1.00 | 0.00 |
| ATOM | 97 | QB   | PRO | 6 | -1.064 | -6.532 | -2.484 | 1.00 | 0.00 |
| ATOM | 98 | CG   | PRO | 6 | -0.370 | -8.346 | -1.531 | 1.00 | 0.00 |

|      |     |      |      |   |        |        |        |      |      |
|------|-----|------|------|---|--------|--------|--------|------|------|
| ATOM | 99  | 2HG  | PRO  | 6 | 0.120  | -8.512 | -2.491 | 1.00 | 0.00 |
| ATOM | 100 | QG   | PRO  | 6 | 0.120  | -8.512 | -2.491 | 1.00 | 0.00 |
| ATOM | 101 | 2HD  | PRO  | 6 | 1.672  | -8.063 | -0.855 | 1.00 | 0.00 |
| ATOM | 102 | QD   | PRO  | 6 | 1.672  | -8.063 | -0.855 | 1.00 | 0.00 |
| ATOM | 103 | C    | PRO  | 6 | -2.084 | -6.514 | 0.736  | 1.00 | 0.00 |
| ATOM | 104 | O    | PRO  | 6 | -2.463 | -7.623 | 1.130  | 1.00 | 0.00 |
| ATOM | 105 | N    | THRM | 7 | -2.590 | -5.392 | 1.210  | 1.00 | 0.00 |
| ATOM | 106 | QB   | THRM | 7 | -3.900 | -5.576 | 2.496  | 1.00 | 0.00 |
| ATOM | 107 | CN   | THRM | 7 | -3.641 | -5.540 | 2.242  | 1.00 | 0.00 |
| ATOM | 108 | 1HNB | THRM | 7 | -3.816 | -6.598 | 2.435  | 1.00 | 0.00 |
| ATOM | 109 | 2HNB | THRM | 7 | -3.318 | -5.053 | 3.163  | 1.00 | 0.00 |
| ATOM | 110 | 3HNB | THRM | 7 | -4.564 | -5.078 | 1.892  | 1.00 | 0.00 |
| ATOM | 111 | CA   | THRM | 7 | -2.143 | -4.082 | 0.745  | 1.00 | 0.00 |
| ATOM | 112 | HA   | THRM | 7 | -1.037 | -4.082 | 0.718  | 1.00 | 0.00 |
| ATOM | 113 | CB   | THRM | 7 | -2.681 | -3.797 | -0.697 | 1.00 | 0.00 |
| ATOM | 114 | HB   | THRM | 7 | -1.815 | -3.758 | -1.392 | 1.00 | 0.00 |
| ATOM | 115 | QG2  | THRM | 7 | -3.987 | -5.075 | -1.408 | 1.00 | 0.00 |
| ATOM | 116 | OG1  | THRM | 7 | -3.354 | -2.546 | -0.739 | 1.00 | 0.00 |
| ATOM | 117 | 1HG  | THRM | 7 | -3.507 | -2.355 | -1.669 | 1.00 | 0.00 |
| ATOM | 118 | CG2  | THRM | 7 | -3.708 | -4.806 | -1.257 | 1.00 | 0.00 |
| ATOM | 119 | 1HG2 | THRM | 7 | -4.685 | -4.730 | -0.748 | 1.00 | 0.00 |
| ATOM | 120 | 2HG2 | THRM | 7 | -3.916 | -4.645 | -2.332 | 1.00 | 0.00 |
| ATOM | 121 | 3HG2 | THRM | 7 | -3.360 | -5.851 | -1.145 | 1.00 | 0.00 |
| ATOM | 122 | C    | THRM | 7 | -2.569 | -2.994 | 1.700  | 1.00 | 0.00 |
| ATOM | 123 | O    | THRM | 7 | -3.388 | -3.248 | 2.582  | 1.00 | 0.00 |
| ATOM | 124 | N    | VAL  | 8 | -2.014 | -1.806 | 1.512  | 1.00 | 0.00 |
| ATOM | 125 | H    | VAL  | 8 | -1.349 | -1.607 | 0.792  | 1.00 | 0.00 |
| ATOM | 126 | CA   | VAL  | 8 | -2.347 | -0.680 | 2.368  | 1.00 | 0.00 |
| ATOM | 127 | HA   | VAL  | 8 | -3.363 | -0.833 | 2.733  | 1.00 | 0.00 |
| ATOM | 128 | CB   | VAL  | 8 | -1.409 | -0.646 | 3.577  | 1.00 | 0.00 |
| ATOM | 129 | HB   | VAL  | 8 | -1.192 | 0.398  | 3.803  | 1.00 | 0.00 |
| ATOM | 130 | QG1  | VAL  | 8 | -2.234 | -1.413 | 5.097  | 1.00 | 0.00 |
| ATOM | 131 | QG2  | VAL  | 8 | 0.231  | -1.508 | 3.186  | 1.00 | 0.00 |
| ATOM | 132 | CG1  | VAL  | 8 | -2.076 | -1.266 | 4.805  | 1.00 | 0.00 |
| ATOM | 133 | 1HG1 | VAL  | 8 | -1.445 | -2.063 | 5.198  | 1.00 | 0.00 |
| ATOM | 134 | 2HG1 | VAL  | 8 | -2.212 | -0.501 | 5.570  | 1.00 | 0.00 |
| ATOM | 135 | 3HG1 | VAL  | 8 | -3.046 | -1.676 | 4.524  | 1.00 | 0.00 |
| ATOM | 136 | CG2  | VAL  | 8 | -0.084 | -1.343 | 3.261  | 1.00 | 0.00 |
| ATOM | 137 | 1HG2 | VAL  | 8 | -0.222 | -2.423 | 3.303  | 1.00 | 0.00 |
| ATOM | 138 | 2HG2 | VAL  | 8 | 0.249  | -1.057 | 2.263  | 1.00 | 0.00 |
| ATOM | 139 | 3HG2 | VAL  | 8 | 0.667  | -1.044 | 3.993  | 1.00 | 0.00 |
| ATOM | 140 | QOG  | VAL  | 8 | -1.002 | -1.461 | 4.142  | 1.00 | 0.00 |
| ATOM | 141 | C    | VAL  | 8 | -2.309 | 0.609  | 1.545  | 1.00 | 0.00 |
| ATOM | 142 | O    | VAL  | 8 | -1.898 | 0.653  | 0.379  | 1.00 | 0.00 |
| ATOM | 143 | N    | THRM | 9 | -2.750 | 1.684  | 2.172  | 1.00 | 0.00 |
| ATOM | 144 | QB   | THRM | 9 | -3.323 | 1.431  | 3.906  | 1.00 | 0.00 |
| ATOM | 145 | CN   | THRM | 9 | -3.209 | 1.481  | 3.564  | 1.00 | 0.00 |
| ATOM | 146 | 1HNB | THRM | 9 | -3.097 | 0.431  | 3.834  | 1.00 | 0.00 |
| ATOM | 147 | 2HNB | THRM | 9 | -2.614 | 2.095  | 4.238  | 1.00 | 0.00 |
| ATOM | 148 | 3HNB | THRM | 9 | -4.259 | 1.766  | 3.645  | 1.00 | 0.00 |
| ATOM | 149 | CA   | THRM | 9 | -2.783 | 2.996  | 1.530  | 1.00 | 0.00 |
| ATOM | 150 | HA   | THRM | 9 | -2.476 | 2.875  | 0.475  | 1.00 | 0.00 |
| ATOM | 151 | CB   | THRM | 9 | -4.230 | 3.592  | 1.570  | 1.00 | 0.00 |
| ATOM | 152 | HB   | THRM | 9 | -4.298 | 4.285  | 2.436  | 1.00 | 0.00 |
| ATOM | 153 | QG2  | THRM | 9 | -4.821 | 4.548  | -0.036 | 1.00 | 0.00 |
| ATOM | 154 | OG1  | THRM | 9 | -5.189 | 2.558  | 1.739  | 1.00 | 0.00 |
| ATOM | 155 | 1HG  | THRM | 9 | -5.141 | 2.015  | 0.946  | 1.00 | 0.00 |
| ATOM | 156 | CG2  | THRM | 9 | -4.694 | 4.348  | 0.306  | 1.00 | 0.00 |
| ATOM | 157 | 1HG2 | THRM | 9 | -4.557 | 3.746  | -0.611 | 1.00 | 0.00 |

|      |     |      |      |    |        |       |        |      |      |
|------|-----|------|------|----|--------|-------|--------|------|------|
| ATOM | 158 | 2HG2 | THRM | 9  | -5.769 | 4.606 | 0.338  | 1.00 | 0.00 |
| ATOM | 159 | 3HG2 | THRM | 9  | -4.136 | 5.292 | 0.165  | 1.00 | 0.00 |
| ATOM | 160 | C    | THRM | 9  | -1.798 | 3.940 | 2.179  | 1.00 | 0.00 |
| ATOM | 161 | O    | THRM | 9  | -2.159 | 4.884 | 2.852  | 1.00 | 0.00 |
| ATOM | 162 | N    | VALM | 10 | -0.521 | 3.676 | 1.972  | 1.00 | 0.00 |
| ATOM | 163 | QB   | VALM | 10 | -0.158 | 2.202 | 0.926  | 1.00 | 0.00 |
| ATOM | 164 | CN   | VALM | 10 | -0.231 | 2.493 | 1.132  | 1.00 | 0.00 |
| ATOM | 165 | 1HNB | VALM | 10 | -0.450 | 1.585 | 1.694  | 1.00 | 0.00 |
| ATOM | 166 | 2HNB | VALM | 10 | -0.847 | 2.523 | 0.235  | 1.00 | 0.00 |
| ATOM | 167 | 3HNB | VALM | 10 | 0.823  | 2.499 | 0.848  | 1.00 | 0.00 |
| ATOM | 168 | CA   | VALM | 10 | 0.541  | 4.504 | 2.537  | 1.00 | 0.00 |
| ATOM | 169 | HA   | VALM | 10 | 0.192  | 5.552 | 2.581  | 1.00 | 0.00 |
| ATOM | 170 | CB   | VALM | 10 | 0.888  | 4.008 | 3.996  | 1.00 | 0.00 |
| ATOM | 171 | HB   | VALM | 10 | 1.793  | 3.368 | 3.919  | 1.00 | 0.00 |
| ATOM | 172 | QG1  | VALM | 10 | 1.307  | 5.418 | 5.315  | 1.00 | 0.00 |
| ATOM | 173 | QG2  | VALM | 10 | -0.520 | 2.925 | 4.828  | 1.00 | 0.00 |
| ATOM | 174 | CG1  | VALM | 10 | 1.218  | 5.112 | 5.039  | 1.00 | 0.00 |
| ATOM | 175 | 1HG1 | VALM | 10 | 1.356  | 4.703 | 6.058  | 1.00 | 0.00 |
| ATOM | 176 | 2HG1 | VALM | 10 | 2.139  | 5.670 | 4.783  | 1.00 | 0.00 |
| ATOM | 177 | 3HG1 | VALM | 10 | 0.427  | 5.882 | 5.103  | 1.00 | 0.00 |
| ATOM | 178 | CG2  | VALM | 10 | -0.223 | 3.150 | 4.648  | 1.00 | 0.00 |
| ATOM | 179 | 1HG2 | VALM | 10 | -0.500 | 2.279 | 4.024  | 1.00 | 0.00 |
| ATOM | 180 | 2HG2 | VALM | 10 | 0.084  | 2.760 | 5.634  | 1.00 | 0.00 |
| ATOM | 181 | 3HG2 | VALM | 10 | -1.145 | 3.735 | 4.825  | 1.00 | 0.00 |
| ATOM | 182 | QQG  | VALM | 10 | 0.393  | 4.172 | 5.071  | 1.00 | 0.00 |
| ATOM | 183 | C    | VALM | 10 | 1.768  | 4.485 | 1.657  | 1.00 | 0.00 |
| ATOM | 184 | O    | VALM | 10 | 2.841  | 4.000 | 2.038  | 1.00 | 0.00 |
| ATOM | 185 | N    | ILEM | 11 | 1.628  | 5.014 | 0.457  | 1.00 | 0.00 |
| ATOM | 186 | QB   | ILEM | 11 | -0.042 | 5.688 | 0.060  | 1.00 | 0.00 |
| ATOM | 187 | CN   | ILEM | 11 | 0.288  | 5.555 | 0.139  | 1.00 | 0.00 |
| ATOM | 188 | 1HNB | ILEM | 11 | -0.375 | 5.412 | 0.992  | 1.00 | 0.00 |
| ATOM | 189 | 2HNB | ILEM | 11 | 0.367  | 6.619 | -0.084 | 1.00 | 0.00 |
| ATOM | 190 | 3HNB | ILEM | 11 | -0.120 | 5.033 | -0.727 | 1.00 | 0.00 |
| ATOM | 191 | CA   | ILEM | 11 | 2.729  | 5.065 | -0.501 | 1.00 | 0.00 |
| ATOM | 192 | HA   | ILEM | 11 | 2.385  | 5.648 | -1.375 | 1.00 | 0.00 |
| ATOM | 193 | CB   | ILEM | 11 | 3.995  | 5.790 | 0.114  | 1.00 | 0.00 |
| ATOM | 194 | HB   | ILEM | 11 | 3.800  | 5.899 | 1.202  | 1.00 | 0.00 |
| ATOM | 195 | QG2  | ILEM | 11 | 5.657  | 4.727 | -0.098 | 1.00 | 0.00 |
| ATOM | 196 | CG2  | ILEM | 11 | 5.305  | 4.959 | -0.047 | 1.00 | 0.00 |
| ATOM | 197 | 1HG2 | ILEM | 11 | 5.105  | 3.888 | -0.231 | 1.00 | 0.00 |
| ATOM | 198 | 2HG2 | ILEM | 11 | 5.917  | 5.275 | -0.912 | 1.00 | 0.00 |
| ATOM | 199 | 3HG2 | ILEM | 11 | 5.949  | 5.017 | 0.850  | 1.00 | 0.00 |
| ATOM | 200 | CG1  | ILEM | 11 | 4.258  | 7.225 | -0.442 | 1.00 | 0.00 |
| ATOM | 201 | 2HG1 | ILEM | 11 | 4.077  | 7.238 | -1.533 | 1.00 | 0.00 |
| ATOM | 202 | QG1  | ILEM | 11 | 4.077  | 7.238 | -1.533 | 1.00 | 0.00 |
| ATOM | 203 | QD1  | ILEM | 11 | 3.144  | 8.644 | 0.308  | 1.00 | 0.00 |
| ATOM | 204 | CD1  | ILEM | 11 | 3.376  | 8.347 | 0.145  | 1.00 | 0.00 |
| ATOM | 205 | 1HD1 | ILEM | 11 | 3.316  | 8.273 | 1.246  | 1.00 | 0.00 |
| ATOM | 206 | 2HD1 | ILEM | 11 | 3.778  | 9.350 | -0.091 | 1.00 | 0.00 |
| ATOM | 207 | 3HD1 | ILEM | 11 | 2.338  | 8.310 | -0.231 | 1.00 | 0.00 |
| ATOM | 208 | C    | ILEM | 11 | 3.065  | 3.684 | -1.012 | 1.00 | 0.00 |
| ATOM | 209 | O    | ILEM | 11 | 2.751  | 2.659 | -0.390 | 1.00 | 0.00 |
| ATOM | 210 | N    | PIPO | 12 | 3.715  | 3.635 | -2.160 | 1.00 | 0.00 |
| ATOM | 211 | CE   | PIPO | 12 | 4.107  | 2.388 | -2.779 | 1.00 | 0.00 |
| ATOM | 212 | CA   | PIPO | 12 | 4.104  | 4.832 | -2.890 | 1.00 | 0.00 |
| ATOM | 213 | HA   | PIPO | 12 | 4.601  | 5.554 | -2.242 | 1.00 | 0.00 |
| ATOM | 214 | CB   | PIPO | 12 | 5.077  | 4.504 | -4.038 | 1.00 | 0.00 |
| ATOM | 215 | 2HB  | PIPO | 12 | 5.345  | 5.423 | -4.561 | 1.00 | 0.00 |
| ATOM | 216 | 3HB  | PIPO | 12 | 5.977  | 4.042 | -3.633 | 1.00 | 0.00 |

|         |     |      |      |    |        |        |        |      |      |
|---------|-----|------|------|----|--------|--------|--------|------|------|
| ATOM    | 217 | QB   | PIPO | 12 | 5.661  | 4.732  | -4.097 | 1.00 | 0.00 |
| ATOM    | 218 | CG   | PIPO | 12 | 4.401  | 3.534  | -5.023 | 1.00 | 0.00 |
| ATOM    | 219 | 2HG  | PIPO | 12 | 5.090  | 3.302  | -5.836 | 1.00 | 0.00 |
| ATOM    | 220 | 3HG  | PIPO | 12 | 3.502  | 3.995  | -5.431 | 1.00 | 0.00 |
| ATOM    | 221 | QG   | PIPO | 12 | 4.296  | 3.649  | -5.633 | 1.00 | 0.00 |
| ATOM    | 222 | CD   | PIPO | 12 | 3.992  | 2.514  | -4.309 | 1.00 | 0.00 |
| ATOM    | 223 | 2HD  | PIPO | 12 | 4.288  | 1.574  | -4.774 | 1.00 | 0.00 |
| ATOM    | 224 | 3HD  | PIPO | 12 | 2.962  | 2.744  | -4.579 | 1.00 | 0.00 |
| ATOM    | 225 | OD   | PIPO | 12 | 3.625  | 2.159  | -4.677 | 1.00 | 0.00 |
| ATOM    | 226 | 1HE  | PIPO | 12 | 5.138  | 2.157  | -2.510 | 1.00 | 0.00 |
| ATOM    | 227 | 2HE  | PIPO | 12 | 3.454  | 1.587  | -2.430 | 1.00 | 0.00 |
| ATOM    | 228 | QE   | PIPO | 12 | 4.296  | 1.872  | -2.470 | 1.00 | 0.00 |
| ATOM    | 229 | C    | PIPO | 12 | 2.888  | 5.538  | -3.512 | 1.00 | 0.00 |
| ATOM    | 230 | O    | PIPO | 12 | 2.711  | 6.732  | -3.243 | 1.00 | 0.00 |
| ATOM    | 231 | O1'  | PHEO | 13 | 2.075  | 4.873  | -4.311 | 1.00 | 0.00 |
| ATOM    | 232 | CA   | PHEO | 13 | 0.663  | 5.222  | -4.443 | 1.00 | 0.00 |
| ATOM    | 233 | HA   | PHEO | 13 | 0.552  | 6.117  | -5.084 | 1.00 | 0.00 |
| ATOM    | 234 | CB   | PHEO | 13 | 0.078  | 5.506  | -3.026 | 1.00 | 0.00 |
| ATOM    | 235 | 2HB  | PHEO | 13 | 0.909  | 5.659  | -2.309 | 1.00 | 0.00 |
| ATOM    | 236 | QB   | PHEO | 13 | 0.909  | 5.659  | -2.309 | 1.00 | 0.00 |
| ATOM    | 237 | QD   | PHEO | 13 | -1.010 | 6.816  | -2.919 | 1.00 | 0.00 |
| ATOM    | 238 | QE   | PHEO | 13 | -2.633 | 8.664  | -2.816 | 1.00 | 0.00 |
| ATOM    | 239 | QR   | PHEO | 13 | -2.147 | 8.110  | -2.847 | 1.00 | 0.00 |
| ATOM    | 240 | CG   | PHEO | 13 | -0.887 | 6.695  | -2.910 | 1.00 | 0.00 |
| ATOM    | 241 | CD1  | PHEO | 13 | -2.073 | 6.555  | -2.181 | 1.00 | 0.00 |
| ATOM    | 242 | 1HD  | PHEO | 13 | -2.300 | 5.619  | -1.686 | 1.00 | 0.00 |
| ATOM    | 243 | CE1  | PHEO | 13 | -2.996 | 7.594  | -2.133 | 1.00 | 0.00 |
| ATOM    | 244 | 1HE  | PHEO | 13 | -3.922 | 7.464  | -1.592 | 1.00 | 0.00 |
| ATOM    | 245 | CZ   | PHEO | 13 | -2.730 | 8.789  | -2.799 | 1.00 | 0.00 |
| ATOM    | 246 | HZ   | PHEO | 13 | -3.450 | 9.592  | -2.765 | 1.00 | 0.00 |
| ATOM    | 247 | CE2  | PHEO | 13 | -1.546 | 8.940  | -3.517 | 1.00 | 0.00 |
| ATOM    | 248 | 2HE  | PHEO | 13 | -1.343 | 9.864  | -4.040 | 1.00 | 0.00 |
| ATOM    | 249 | CD2  | PHEO | 13 | -0.626 | 7.895  | -3.575 | 1.00 | 0.00 |
| ATOM    | 250 | 2HD  | PHEO | 13 | 0.280  | 8.013  | -4.152 | 1.00 | 0.00 |
| ATOM    | 251 | C    | PHEO | 13 | -0.121 | 4.086  | -5.054 | 1.00 | 0.00 |
| ATOM    | 252 | O    | PHEO | 13 | -0.195 | 3.920  | -6.303 | 1.00 | 0.00 |
| TER     |     |      |      |    |        |        |        |      |      |
| ENDMDL  |     |      |      |    |        |        |        |      |      |
| MODEL 6 |     |      |      |    |        |        |        |      |      |
| ATOM    | 1   | N    | VALM | 1  | -0.621 | 3.399  | -4.503 | 1.00 | 0.00 |
| ATOM    | 2   | QB   | VALM | 1  | -2.344 | 4.055  | -4.491 | 1.00 | 0.00 |
| ATOM    | 3   | CN   | VALM | 1  | -2.003 | 3.926  | -4.494 | 1.00 | 0.00 |
| ATOM    | 4   | 1HNB | VALM | 1  | -2.317 | 4.105  | -3.465 | 1.00 | 0.00 |
| ATOM    | 5   | 2HNB | VALM | 1  | -2.041 | 4.860  | -5.052 | 1.00 | 0.00 |
| ATOM    | 6   | 3HNB | VALM | 1  | -2.673 | 3.200  | -4.955 | 1.00 | 0.00 |
| ATOM    | 7   | CA   | VALM | 1  | -0.337 | 1.971  | -4.394 | 1.00 | 0.00 |
| ATOM    | 8   | HA   | VALM | 1  | -1.280 | 1.436  | -4.177 | 1.00 | 0.00 |
| ATOM    | 9   | CB   | VALM | 1  | 0.265  | 1.439  | -5.755 | 1.00 | 0.00 |
| ATOM    | 10  | HB   | VALM | 1  | 1.070  | 2.143  | -6.055 | 1.00 | 0.00 |
| ATOM    | 11  | QG1  | VALM | 1  | 1.090  | -0.356 | -5.709 | 1.00 | 0.00 |
| ATOM    | 12  | QG2  | VALM | 1  | -1.035 | 1.379  | -7.224 | 1.00 | 0.00 |
| ATOM    | 13  | CG1  | VALM | 1  | 0.906  | 0.024  | -5.720 | 1.00 | 0.00 |
| ATOM    | 14  | 1HG1 | VALM | 1  | 0.162  | -0.782 | -5.867 | 1.00 | 0.00 |
| ATOM    | 15  | 2HG1 | VALM | 1  | 1.684  | -0.104 | -6.496 | 1.00 | 0.00 |
| ATOM    | 16  | 3HG1 | VALM | 1  | 1.422  | -0.181 | -4.763 | 1.00 | 0.00 |
| ATOM    | 17  | CG2  | VALM | 1  | -0.757 | 1.395  | -6.917 | 1.00 | 0.00 |
| ATOM    | 18  | 1HG2 | VALM | 1  | -0.380 | 1.897  | -7.827 | 1.00 | 0.00 |
| ATOM    | 19  | 2HG2 | VALM | 1  | -1.013 | 0.357  | -7.201 | 1.00 | 0.00 |
| ATOM    | 20  | 3HG2 | VALM | 1  | -1.713 | 1.881  | -6.644 | 1.00 | 0.00 |

|      |    |      |      |   |        |        |        |      |      |
|------|----|------|------|---|--------|--------|--------|------|------|
| ATOM | 21 | QOG  | VALM | 1 | 0.027  | 0.512  | -6.466 | 1.00 | 0.00 |
| ATOM | 22 | C    | VALM | 1 | 0.604  | 1.692  | -3.246 | 1.00 | 0.00 |
| ATOM | 23 | O    | VALM | 1 | 1.586  | 2.413  | -3.080 | 1.00 | 0.00 |
| ATOM | 24 | N    | PRO  | 2 | 0.284  | 0.631  | -2.458 | 1.00 | 0.00 |
| ATOM | 25 | CD   | PRO  | 2 | -0.872 | -0.244 | -2.626 | 1.00 | 0.00 |
| ATOM | 26 | CA   | PRO  | 2 | 1.114  | 0.265  | -1.323 | 1.00 | 0.00 |
| ATOM | 27 | HA   | PRO  | 2 | 1.403  | 1.084  | -0.826 | 1.00 | 0.00 |
| ATOM | 28 | CB   | PRO  | 2 | 0.236  | -0.632 | -0.466 | 1.00 | 0.00 |
| ATOM | 29 | 2HB  | PRO  | 2 | -0.163 | -0.088 | 0.390  | 1.00 | 0.00 |
| ATOM | 30 | QB   | PRO  | 2 | -0.163 | -0.088 | 0.390  | 1.00 | 0.00 |
| ATOM | 31 | CG   | PRO  | 2 | -0.884 | -1.112 | -1.377 | 1.00 | 0.00 |
| ATOM | 32 | 2HG  | PRO  | 2 | -1.846 | -1.038 | -0.870 | 1.00 | 0.00 |
| ATOM | 33 | QG   | PRO  | 2 | -1.846 | -1.038 | -0.870 | 1.00 | 0.00 |
| ATOM | 34 | 2HD  | PRO  | 2 | -1.794 | 0.329  | -2.718 | 1.00 | 0.00 |
| ATOM | 35 | QD   | PRO  | 2 | -1.794 | 0.329  | -2.718 | 1.00 | 0.00 |
| ATOM | 36 | C    | PRO  | 2 | 2.402  | -0.420 | -1.783 | 1.00 | 0.00 |
| ATOM | 37 | O    | PRO  | 2 | 2.460  | -0.962 | -2.886 | 1.00 | 0.00 |
| ATOM | 38 | N    | ILE  | 3 | 3.401  | -0.375 | -0.915 | 1.00 | 0.00 |
| ATOM | 39 | H    | ILE  | 3 | 3.345  | 0.067  | -0.020 | 1.00 | 0.00 |
| ATOM | 40 | CA   | ILE  | 3 | 4.684  | -0.986 | -1.219 | 1.00 | 0.00 |
| ATOM | 41 | HA   | ILE  | 3 | 4.705  | -1.188 | -2.290 | 1.00 | 0.00 |
| ATOM | 42 | CB   | ILE  | 3 | 5.825  | -0.012 | -0.919 | 1.00 | 0.00 |
| ATOM | 43 | HB   | ILE  | 3 | 6.518  | -0.498 | -0.232 | 1.00 | 0.00 |
| ATOM | 44 | QG2  | ILE  | 3 | 6.796  | 0.400  | -2.492 | 1.00 | 0.00 |
| ATOM | 45 | CG2  | ILE  | 3 | 6.610  | 0.321  | -2.190 | 1.00 | 0.00 |
| ATOM | 46 | 1HG2 | ILE  | 3 | 6.998  | 1.337  | -2.122 | 1.00 | 0.00 |
| ATOM | 47 | 2HG2 | ILE  | 3 | 7.439  | -0.378 | -2.299 | 1.00 | 0.00 |
| ATOM | 48 | 3HG2 | ILE  | 3 | 5.951  | 0.241  | -3.055 | 1.00 | 0.00 |
| ATOM | 49 | CG1  | ILE  | 3 | 5.304  | 1.246  | -0.221 | 1.00 | 0.00 |
| ATOM | 50 | 2HG1 | ILE  | 3 | 4.354  | 1.545  | -0.665 | 1.00 | 0.00 |
| ATOM | 51 | QG1  | ILE  | 3 | 4.354  | 1.545  | -0.665 | 1.00 | 0.00 |
| ATOM | 52 | QD1  | ILE  | 3 | 5.076  | 0.947  | 1.634  | 1.00 | 0.00 |
| ATOM | 53 | CD1  | ILE  | 3 | 5.120  | 1.005  | 1.278  | 1.00 | 0.00 |
| ATOM | 54 | 1HD1 | ILE  | 3 | 4.056  | 0.995  | 1.517  | 1.00 | 0.00 |
| ATOM | 55 | 2HD1 | ILE  | 3 | 5.562  | 0.045  | 1.549  | 1.00 | 0.00 |
| ATOM | 56 | 3HD1 | ILE  | 3 | 5.610  | 1.801  | 1.837  | 1.00 | 0.00 |
| ATOM | 57 | C    | ILE  | 3 | 4.801  | -2.317 | -0.473 | 1.00 | 0.00 |
| ATOM | 58 | O    | ILE  | 3 | 5.303  | -3.332 | -0.977 | 1.00 | 0.00 |
| ATOM | 59 | N    | PIP  | 4 | 4.323  | -2.310 | 0.757  | 1.00 | 0.00 |
| ATOM | 60 | CE   | PIP  | 4 | 3.734  | -1.133 | 1.357  | 1.00 | 0.00 |
| ATOM | 61 | CA   | PIP  | 4 | 4.364  | -3.482 | 1.619  | 1.00 | 0.00 |
| ATOM | 62 | HA   | PIP  | 4 | 5.356  | -3.935 | 1.634  | 1.00 | 0.00 |
| ATOM | 63 | CB   | PIP  | 4 | 3.999  | -3.132 | 3.073  | 1.00 | 0.00 |
| ATOM | 64 | 2HB  | PIP  | 4 | 4.041  | -4.032 | 3.685  | 1.00 | 0.00 |
| ATOM | 65 | 3HB  | PIP  | 4 | 4.706  | -2.398 | 3.458  | 1.00 | 0.00 |
| ATOM | 66 | QB   | PIP  | 4 | 4.373  | -3.215 | 3.572  | 1.00 | 0.00 |
| ATOM | 67 | CG   | PIP  | 4 | 2.576  | -2.547 | 3.118  | 1.00 | 0.00 |
| ATOM | 68 | 2HG  | PIP  | 4 | 2.317  | -2.298 | 4.148  | 1.00 | 0.00 |
| ATOM | 69 | 3HG  | PIP  | 4 | 1.867  | -3.281 | 2.734  | 1.00 | 0.00 |
| ATOM | 70 | QG   | PIP  | 4 | 2.092  | -2.790 | 3.441  | 1.00 | 0.00 |
| ATOM | 71 | CD   | PIP  | 4 | 2.563  | -1.551 | 2.267  | 1.00 | 0.00 |
| ATOM | 72 | 2HD  | PIP  | 4 | 2.119  | -0.663 | 2.718  | 1.00 | 0.00 |
| ATOM | 73 | 3HD  | PIP  | 4 | 1.810  | -2.072 | 1.674  | 1.00 | 0.00 |
| ATOM | 74 | QD   | PIP  | 4 | 1.965  | -1.367 | 2.196  | 1.00 | 0.00 |
| ATOM | 75 | 1HE  | PIP  | 4 | 4.484  | -0.612 | 1.949  | 1.00 | 0.00 |
| ATOM | 76 | 2HE  | PIP  | 4 | 3.365  | -0.472 | 0.572  | 1.00 | 0.00 |
| ATOM | 77 | QE   | PIP  | 4 | 3.925  | -0.542 | 1.261  | 1.00 | 0.00 |
| ATOM | 78 | C    | PIP  | 4 | 3.377  | -4.566 | 1.150  | 1.00 | 0.00 |
| ATOM | 79 | O    | PIP  | 4 | 2.730  | -4.290 | 0.140  | 1.00 | 0.00 |

|      |     |      |      |   |        |        |        |      |      |
|------|-----|------|------|---|--------|--------|--------|------|------|
| ATOM | 80  | N    | ALA  | 5 | 3.276  | -5.705 | 1.819  | 1.00 | 0.00 |
| ATOM | 81  | H    | ALA  | 5 | 3.806  | -5.920 | 2.639  | 1.00 | 0.00 |
| ATOM | 82  | CA   | ALA  | 5 | 2.359  | -6.746 | 1.389  | 1.00 | 0.00 |
| ATOM | 83  | HA   | ALA  | 5 | 2.781  | -7.215 | 0.502  | 1.00 | 0.00 |
| ATOM | 84  | QB   | ALA  | 5 | 2.199  | -8.050 | 2.752  | 1.00 | 0.00 |
| ATOM | 85  | CB   | ALA  | 5 | 2.230  | -7.800 | 2.491  | 1.00 | 0.00 |
| ATOM | 86  | 1HB  | ALA  | 5 | 2.803  | -8.685 | 2.215  | 1.00 | 0.00 |
| ATOM | 87  | 2HB  | ALA  | 5 | 2.614  | -7.395 | 3.427  | 1.00 | 0.00 |
| ATOM | 88  | 3HB  | ALA  | 5 | 1.181  | -8.070 | 2.614  | 1.00 | 0.00 |
| ATOM | 89  | C    | ALA  | 5 | 1.012  | -6.115 | 1.026  | 1.00 | 0.00 |
| ATOM | 90  | O    | ALA  | 5 | 0.677  | -5.036 | 1.513  | 1.00 | 0.00 |
| ATOM | 91  | N    | PRO  | 6 | 0.258  | -6.833 | 0.152  | 1.00 | 0.00 |
| ATOM | 92  | CD   | PRO  | 6 | 0.624  | -8.115 | -0.446 | 1.00 | 0.00 |
| ATOM | 93  | CA   | PRO  | 6 | -1.043 | -6.355 | -0.283 | 1.00 | 0.00 |
| ATOM | 94  | HA   | PRO  | 6 | -1.008 | -5.373 | -0.468 | 1.00 | 0.00 |
| ATOM | 95  | CB   | PRO  | 6 | -1.359 | -7.155 | -1.536 | 1.00 | 0.00 |
| ATOM | 96  | 2HB  | PRO  | 6 | -1.180 | -6.561 | -2.433 | 1.00 | 0.00 |
| ATOM | 97  | QB   | PRO  | 6 | -1.180 | -6.561 | -2.433 | 1.00 | 0.00 |
| ATOM | 98  | CG   | PRO  | 6 | -0.445 | -8.369 | -1.496 | 1.00 | 0.00 |
| ATOM | 99  | 2HG  | PRO  | 6 | 0.012  | -8.536 | -2.472 | 1.00 | 0.00 |
| ATOM | 100 | QG   | PRO  | 6 | 0.012  | -8.536 | -2.472 | 1.00 | 0.00 |
| ATOM | 101 | 2HD  | PRO  | 6 | 1.617  | -8.074 | -0.893 | 1.00 | 0.00 |
| ATOM | 102 | QD   | PRO  | 6 | 1.617  | -8.074 | -0.893 | 1.00 | 0.00 |
| ATOM | 103 | C    | PRO  | 6 | -2.089 | -6.534 | 0.819  | 1.00 | 0.00 |
| ATOM | 104 | O    | PRO  | 6 | -2.431 | -7.643 | 1.250  | 1.00 | 0.00 |
| ATOM | 105 | N    | THRM | 7 | -2.608 | -5.414 | 1.285  | 1.00 | 0.00 |
| ATOM | 106 | QB   | THRM | 7 | -3.871 | -5.598 | 2.614  | 1.00 | 0.00 |
| ATOM | 107 | CN   | THRM | 7 | -3.622 | -5.562 | 2.352  | 1.00 | 0.00 |
| ATOM | 108 | 1HNB | THRM | 7 | -3.766 | -6.620 | 2.573  | 1.00 | 0.00 |
| ATOM | 109 | 2HNB | THRM | 7 | -3.282 | -5.046 | 3.250  | 1.00 | 0.00 |
| ATOM | 110 | 3HNB | THRM | 7 | -4.566 | -5.129 | 2.020  | 1.00 | 0.00 |
| ATOM | 111 | CA   | THRM | 7 | -2.205 | -4.105 | 0.776  | 1.00 | 0.00 |
| ATOM | 112 | HA   | THRM | 7 | -1.102 | -4.086 | 0.700  | 1.00 | 0.00 |
| ATOM | 113 | CB   | THRM | 7 | -2.812 | -3.857 | -0.646 | 1.00 | 0.00 |
| ATOM | 114 | HB   | THRM | 7 | -1.984 | -3.595 | -1.338 | 1.00 | 0.00 |
| ATOM | 115 | QG2  | THRM | 7 | -3.826 | -5.339 | -1.433 | 1.00 | 0.00 |
| ATOM | 116 | OG1  | THRM | 7 | -3.735 | -2.775 | -0.611 | 1.00 | 0.00 |
| ATOM | 117 | 1HG  | THRM | 7 | -3.258 | -2.031 | -0.229 | 1.00 | 0.00 |
| ATOM | 118 | CG2  | THRM | 7 | -3.610 | -5.026 | -1.263 | 1.00 | 0.00 |
| ATOM | 119 | 1HG2 | THRM | 7 | -4.531 | -4.681 | -1.768 | 1.00 | 0.00 |
| ATOM | 120 | 2HG2 | THRM | 7 | -3.033 | -5.572 | -2.032 | 1.00 | 0.00 |
| ATOM | 121 | 3HG2 | THRM | 7 | -3.913 | -5.766 | -0.498 | 1.00 | 0.00 |
| ATOM | 122 | C    | THRM | 7 | -2.610 | -3.007 | 1.729  | 1.00 | 0.00 |
| ATOM | 123 | O    | THRM | 7 | -3.412 | -3.250 | 2.629  | 1.00 | 0.00 |
| ATOM | 124 | N    | VAL  | 8 | -2.053 | -1.822 | 1.520  | 1.00 | 0.00 |
| ATOM | 125 | H    | VAL  | 8 | -1.401 | -1.632 | 0.787  | 1.00 | 0.00 |
| ATOM | 126 | CA   | VAL  | 8 | -2.366 | -0.688 | 2.372  | 1.00 | 0.00 |
| ATOM | 127 | HA   | VAL  | 8 | -3.380 | -0.829 | 2.750  | 1.00 | 0.00 |
| ATOM | 128 | CB   | VAL  | 8 | -1.416 | -0.656 | 3.571  | 1.00 | 0.00 |
| ATOM | 129 | HB   | VAL  | 8 | -1.190 | 0.387  | 3.792  | 1.00 | 0.00 |
| ATOM | 130 | QG1  | VAL  | 8 | -2.230 | -1.412 | 5.104  | 1.00 | 0.00 |
| ATOM | 131 | QG2  | VAL  | 8 | 0.214  | -1.530 | 3.167  | 1.00 | 0.00 |
| ATOM | 132 | CG1  | VAL  | 8 | -2.074 | -1.267 | 4.810  | 1.00 | 0.00 |
| ATOM | 133 | 1HG1 | VAL  | 8 | -2.326 | -0.475 | 5.515  | 1.00 | 0.00 |
| ATOM | 134 | 2HG1 | VAL  | 8 | -2.981 | -1.794 | 4.515  | 1.00 | 0.00 |
| ATOM | 135 | 3HG1 | VAL  | 8 | -1.382 | -1.967 | 5.280  | 1.00 | 0.00 |
| ATOM | 136 | CG2  | VAL  | 8 | -0.098 | -1.362 | 3.245  | 1.00 | 0.00 |
| ATOM | 137 | 1HG2 | VAL  | 8 | -0.249 | -2.441 | 3.269  | 1.00 | 0.00 |
| ATOM | 138 | 2HG2 | VAL  | 8 | 0.237  | -1.064 | 2.251  | 1.00 | 0.00 |

|      |     |      |      |    |        |        |        |      |      |
|------|-----|------|------|----|--------|--------|--------|------|------|
| ATOM | 139 | 3HG2 | VAL  | 8  | 0.656  | -1.084 | 3.981  | 1.00 | 0.00 |
| ATOM | 140 | QQG  | VAL  | 8  | -1.008 | -1.471 | 4.135  | 1.00 | 0.00 |
| ATOM | 141 | C    | VAL  | 8  | -2.324 | 0.596  | 1.542  | 1.00 | 0.00 |
| ATOM | 142 | O    | VAL  | 8  | -1.916 | 0.630  | 0.374  | 1.00 | 0.00 |
| ATOM | 143 | N    | THRM | 9  | -2.758 | 1.677  | 2.162  | 1.00 | 0.00 |
| ATOM | 144 | QB   | THRM | 9  | -3.328 | 1.438  | 3.899  | 1.00 | 0.00 |
| ATOM | 145 | CN   | THRM | 9  | -3.215 | 1.485  | 3.556  | 1.00 | 0.00 |
| ATOM | 146 | 1HNB | THRM | 9  | -3.107 | 0.436  | 3.834  | 1.00 | 0.00 |
| ATOM | 147 | 2HNB | THRM | 9  | -2.614 | 2.102  | 4.225  | 1.00 | 0.00 |
| ATOM | 148 | 3HNB | THRM | 9  | -4.263 | 1.776  | 3.639  | 1.00 | 0.00 |
| ATOM | 149 | CA   | THRM | 9  | -2.784 | 2.984  | 1.512  | 1.00 | 0.00 |
| ATOM | 150 | HA   | THRM | 9  | -2.472 | 2.856  | 0.460  | 1.00 | 0.00 |
| ATOM | 151 | CB   | THRM | 9  | -4.232 | 3.581  | 1.538  | 1.00 | 0.00 |
| ATOM | 152 | HB   | THRM | 9  | -4.349 | 4.173  | 2.471  | 1.00 | 0.00 |
| ATOM | 153 | QG2  | THRM | 9  | -4.728 | 4.721  | 0.022  | 1.00 | 0.00 |
| ATOM | 154 | OG1  | THRM | 9  | -5.201 | 2.540  | 1.535  | 1.00 | 0.00 |
| ATOM | 155 | 1HG  | THRM | 9  | -5.973 | 2.893  | 1.988  | 1.00 | 0.00 |
| ATOM | 156 | CG2  | THRM | 9  | -4.625 | 4.477  | 0.343  | 1.00 | 0.00 |
| ATOM | 157 | 1HG2 | THRM | 9  | -4.867 | 5.508  | 0.658  | 1.00 | 0.00 |
| ATOM | 158 | 2HG2 | THRM | 9  | -3.809 | 4.574  | -0.398 | 1.00 | 0.00 |
| ATOM | 159 | 3HG2 | THRM | 9  | -5.507 | 4.082  | -0.194 | 1.00 | 0.00 |
| ATOM | 160 | C    | THRM | 9  | -1.805 | 3.932  | 2.162  | 1.00 | 0.00 |
| ATOM | 161 | O    | THRM | 9  | -2.171 | 4.881  | 2.826  | 1.00 | 0.00 |
| ATOM | 162 | N    | VALM | 10 | -0.526 | 3.667  | 1.964  | 1.00 | 0.00 |
| ATOM | 163 | QB   | VALM | 10 | -0.158 | 2.186  | 0.930  | 1.00 | 0.00 |
| ATOM | 164 | CN   | VALM | 10 | -0.231 | 2.478  | 1.134  | 1.00 | 0.00 |
| ATOM | 165 | 1HNB | VALM | 10 | -0.843 | 2.503  | 0.232  | 1.00 | 0.00 |
| ATOM | 166 | 2HNB | VALM | 10 | 0.824  | 2.481  | 0.858  | 1.00 | 0.00 |
| ATOM | 167 | 3HNB | VALM | 10 | -0.456 | 1.574  | 1.700  | 1.00 | 0.00 |
| ATOM | 168 | CA   | VALM | 10 | 0.532  | 4.497  | 2.532  | 1.00 | 0.00 |
| ATOM | 169 | HA   | VALM | 10 | 0.179  | 5.545  | 2.574  | 1.00 | 0.00 |
| ATOM | 170 | CB   | VALM | 10 | 0.877  | 4.003  | 3.992  | 1.00 | 0.00 |
| ATOM | 171 | HB   | VALM | 10 | 1.790  | 3.374  | 3.918  | 1.00 | 0.00 |
| ATOM | 172 | QG1  | VALM | 10 | 1.282  | 5.411  | 5.319  | 1.00 | 0.00 |
| ATOM | 173 | QG2  | VALM | 10 | -0.517 | 2.892  | 4.811  | 1.00 | 0.00 |
| ATOM | 174 | CG1  | VALM | 10 | 1.188  | 5.109  | 5.038  | 1.00 | 0.00 |
| ATOM | 175 | 1HG1 | VALM | 10 | 0.373  | 5.234  | 5.776  | 1.00 | 0.00 |
| ATOM | 176 | 2HG1 | VALM | 10 | 2.114  | 4.901  | 5.608  | 1.00 | 0.00 |
| ATOM | 177 | 3HG1 | VALM | 10 | 1.359  | 6.098  | 4.572  | 1.00 | 0.00 |
| ATOM | 178 | CG2  | VALM | 10 | -0.227 | 3.130  | 4.636  | 1.00 | 0.00 |
| ATOM | 179 | 1HG2 | VALM | 10 | -1.229 | 3.588  | 4.546  | 1.00 | 0.00 |
| ATOM | 180 | 2HG2 | VALM | 10 | -0.282 | 2.129  | 4.172  | 1.00 | 0.00 |
| ATOM | 181 | 3HG2 | VALM | 10 | -0.040 | 2.959  | 5.714  | 1.00 | 0.00 |
| ATOM | 182 | QQG  | VALM | 10 | 0.383  | 4.151  | 5.065  | 1.00 | 0.00 |
| ATOM | 183 | C    | VALM | 10 | 1.761  | 4.481  | 1.655  | 1.00 | 0.00 |
| ATOM | 184 | O    | VALM | 10 | 2.832  | 3.995  | 2.036  | 1.00 | 0.00 |
| ATOM | 185 | N    | ILEM | 11 | 1.624  | 5.017  | 0.455  | 1.00 | 0.00 |
| ATOM | 186 | QB   | ILEM | 11 | -0.045 | 5.692  | 0.059  | 1.00 | 0.00 |
| ATOM | 187 | CN   | ILEM | 11 | 0.284  | 5.560  | 0.137  | 1.00 | 0.00 |
| ATOM | 188 | 1HNB | ILEM | 11 | -0.380 | 5.412  | 0.989  | 1.00 | 0.00 |
| ATOM | 189 | 2HNB | ILEM | 11 | 0.365  | 6.623  | -0.080 | 1.00 | 0.00 |
| ATOM | 190 | 3HNB | ILEM | 11 | -0.121 | 5.041  | -0.732 | 1.00 | 0.00 |
| ATOM | 191 | CA   | ILEM | 11 | 2.727  | 5.071  | -0.499 | 1.00 | 0.00 |
| ATOM | 192 | HA   | ILEM | 11 | 2.383  | 5.652  | -1.375 | 1.00 | 0.00 |
| ATOM | 193 | CB   | ILEM | 11 | 3.988  | 5.800  | 0.120  | 1.00 | 0.00 |
| ATOM | 194 | HB   | ILEM | 11 | 3.795  | 5.902  | 1.208  | 1.00 | 0.00 |
| ATOM | 195 | QG2  | ILEM | 11 | 5.663  | 4.756  | -0.086 | 1.00 | 0.00 |
| ATOM | 196 | CG2  | ILEM | 11 | 5.305  | 4.981  | -0.050 | 1.00 | 0.00 |
| ATOM | 197 | 1HG2 | ILEM | 11 | 5.926  | 4.990  | 0.864  | 1.00 | 0.00 |



Supplementary Material for Organic & Biomolecular Chemistry  
 This journal is © The Royal Society of Chemistry 2006

|        |     |      |      |    |        |       |        |      |      |
|--------|-----|------|------|----|--------|-------|--------|------|------|
| ATOM   | 198 | 2HG2 | ILEM | 11 | 5.128  | 3.910 | -0.249 | 1.00 | 0.00 |
| ATOM   | 199 | 3HG2 | ILEM | 11 | 5.934  | 5.369 | -0.873 | 1.00 | 0.00 |
| ATOM   | 200 | CG1  | ILEM | 11 | 4.240  | 7.242 | -0.428 | 1.00 | 0.00 |
| ATOM   | 201 | 2HG1 | ILEM | 11 | 4.070  | 7.257 | -1.521 | 1.00 | 0.00 |
| ATOM   | 202 | QG1  | ILEM | 11 | 4.070  | 7.257 | -1.521 | 1.00 | 0.00 |
| ATOM   | 203 | QD1  | ILEM | 11 | 3.094  | 8.642 | 0.308  | 1.00 | 0.00 |
| ATOM   | 204 | CD1  | ILEM | 11 | 3.340  | 8.351 | 0.154  | 1.00 | 0.00 |
| ATOM   | 205 | 1HD1 | ILEM | 11 | 2.287  | 8.212 | -0.152 | 1.00 | 0.00 |
| ATOM   | 206 | 2HD1 | ILEM | 11 | 3.358  | 8.355 | 1.261  | 1.00 | 0.00 |
| ATOM   | 207 | 3HD1 | ILEM | 11 | 3.637  | 9.359 | -0.185 | 1.00 | 0.00 |
| ATOM   | 208 | C    | ILEM | 11 | 3.070  | 3.691 | -1.008 | 1.00 | 0.00 |
| ATOM   | 209 | O    | ILEM | 11 | 2.756  | 2.665 | -0.387 | 1.00 | 0.00 |
| ATOM   | 210 | N    | PIPO | 12 | 3.725  | 3.644 | -2.153 | 1.00 | 0.00 |
| ATOM   | 211 | CE   | PIPO | 12 | 4.124  | 2.397 | -2.769 | 1.00 | 0.00 |
| ATOM   | 212 | CA   | PIPO | 12 | 4.113  | 4.841 | -2.883 | 1.00 | 0.00 |
| ATOM   | 213 | HA   | PIPO | 12 | 4.605  | 5.565 | -2.233 | 1.00 | 0.00 |
| ATOM   | 214 | CB   | PIPO | 12 | 5.092  | 4.516 | -4.026 | 1.00 | 0.00 |
| ATOM   | 215 | 2HB  | PIPO | 12 | 5.360  | 5.436 | -4.548 | 1.00 | 0.00 |
| ATOM   | 216 | 3HB  | PIPO | 12 | 5.991  | 4.057 | -3.616 | 1.00 | 0.00 |
| ATOM   | 217 | QB   | PIPO | 12 | 5.675  | 4.746 | -4.082 | 1.00 | 0.00 |
| ATOM   | 218 | CG   | PIPO | 12 | 4.423  | 3.543 | -5.014 | 1.00 | 0.00 |
| ATOM   | 219 | 2HG  | PIPO | 12 | 5.116  | 3.314 | -5.824 | 1.00 | 0.00 |
| ATOM   | 220 | 3HG  | PIPO | 12 | 3.524  | 4.002 | -5.425 | 1.00 | 0.00 |
| ATOM   | 221 | QG   | PIPO | 12 | 4.320  | 3.658 | -5.624 | 1.00 | 0.00 |
| ATOM   | 222 | CD   | PIPO | 12 | 4.015  | 2.522 | -4.301 | 1.00 | 0.00 |
| ATOM   | 223 | 2HD  | PIPO | 12 | 4.315  | 1.583 | -4.765 | 1.00 | 0.00 |
| ATOM   | 224 | 3HD  | PIPO | 12 | 2.985  | 2.749 | -4.574 | 1.00 | 0.00 |
| ATOM   | 225 | QD   | PIPO | 12 | 3.650  | 2.166 | -4.670 | 1.00 | 0.00 |
| ATOM   | 226 | 1HE  | PIPO | 12 | 5.154  | 2.170 | -2.496 | 1.00 | 0.00 |
| ATOM   | 227 | 2HE  | PIPO | 12 | 3.472  | 1.595 | -2.424 | 1.00 | 0.00 |
| ATOM   | 228 | QE   | PIPO | 12 | 4.313  | 1.882 | -2.460 | 1.00 | 0.00 |
| ATOM   | 229 | C    | PIPO | 12 | 2.897  | 5.543 | -3.509 | 1.00 | 0.00 |
| ATOM   | 230 | O    | PIPO | 12 | 2.719  | 6.739 | -3.247 | 1.00 | 0.00 |
| ATOM   | 231 | O1'  | PHEO | 13 | 2.086  | 4.873 | -4.305 | 1.00 | 0.00 |
| ATOM   | 232 | CA   | PHEO | 13 | 0.676  | 5.229 | -4.450 | 1.00 | 0.00 |
| ATOM   | 233 | HA   | PHEO | 13 | 0.575  | 6.127 | -5.087 | 1.00 | 0.00 |
| ATOM   | 234 | CB   | PHEO | 13 | 0.079  | 5.507 | -3.038 | 1.00 | 0.00 |
| ATOM   | 235 | 2HB  | PHEO | 13 | 0.902  | 5.683 | -2.318 | 1.00 | 0.00 |
| ATOM   | 236 | QB   | PHEO | 13 | 0.902  | 5.683 | -2.318 | 1.00 | 0.00 |
| ATOM   | 237 | QD   | PHEO | 13 | -1.007 | 6.817 | -2.901 | 1.00 | 0.00 |
| ATOM   | 238 | QE   | PHEO | 13 | -2.519 | 8.744 | -2.651 | 1.00 | 0.00 |
| ATOM   | 239 | QR   | PHEO | 13 | -2.066 | 8.167 | -2.726 | 1.00 | 0.00 |
| ATOM   | 240 | CG   | PHEO | 13 | -0.913 | 6.677 | -2.933 | 1.00 | 0.00 |
| ATOM   | 241 | CD1  | PHEO | 13 | -0.617 | 7.892 | -3.560 | 1.00 | 0.00 |
| ATOM   | 242 | 1HD  | PHEO | 13 | 0.297  | 8.002 | -4.130 | 1.00 | 0.00 |
| ATOM   | 243 | CE1  | PHEO | 13 | -1.465 | 8.984 | -3.410 | 1.00 | 0.00 |
| ATOM   | 244 | 1HE  | PHEO | 13 | -1.212 | 9.927 | -3.873 | 1.00 | 0.00 |
| ATOM   | 245 | CZ   | PHEO | 13 | -2.624 | 8.863 | -2.646 | 1.00 | 0.00 |
| ATOM   | 246 | HZ   | PHEO | 13 | -3.277 | 9.714 | -2.524 | 1.00 | 0.00 |
| ATOM   | 247 | CE2  | PHEO | 13 | -2.930 | 7.652 | -2.028 | 1.00 | 0.00 |
| ATOM   | 248 | 2HE  | PHEO | 13 | -3.826 | 7.561 | -1.430 | 1.00 | 0.00 |
| ATOM   | 249 | CD2  | PHEO | 13 | -2.077 | 6.561 | -2.169 | 1.00 | 0.00 |
| ATOM   | 250 | 2HD  | PHEO | 13 | -2.311 | 5.631 | -1.671 | 1.00 | 0.00 |
| ATOM   | 251 | C    | PHEO | 13 | -0.105 | 4.097 | -5.073 | 1.00 | 0.00 |
| ATOM   | 252 | O    | PHEO | 13 | -0.170 | 3.939 | -6.325 | 1.00 | 0.00 |
| TER    |     |      |      |    |        |       |        |      |      |
| ENDMDL |     |      |      |    |        |       |        |      |      |
| MODEL  |     |      |      | 7  |        |       |        |      |      |
| ATOM   | 1   | N    | VALM | 1  | 0.127  | 3.249 | -5.031 | 1.00 | 0.00 |

|      |    |      |      |   |        |        |        |      |      |
|------|----|------|------|---|--------|--------|--------|------|------|
| ATOM | 2  | QB   | VALM | 1 | 1.229  | 3.037  | -6.493 | 1.00 | 0.00 |
| ATOM | 3  | CN   | VALM | 1 | 1.012  | 3.078  | -6.204 | 1.00 | 0.00 |
| ATOM | 4  | 1HNB | VALM | 1 | 2.052  | 3.109  | -5.882 | 1.00 | 0.00 |
| ATOM | 5  | 2HNB | VALM | 1 | 0.806  | 2.119  | -6.678 | 1.00 | 0.00 |
| ATOM | 6  | 3HNB | VALM | 1 | 0.829  | 3.882  | -6.918 | 1.00 | 0.00 |
| ATOM | 7  | CA   | VALM | 1 | -0.354 | 2.112  | -4.252 | 1.00 | 0.00 |
| ATOM | 8  | HA   | VALM | 1 | -1.321 | 2.380  | -3.788 | 1.00 | 0.00 |
| ATOM | 9  | CB   | VALM | 1 | -0.558 | 0.862  | -5.198 | 1.00 | 0.00 |
| ATOM | 10 | HB   | VALM | 1 | -1.413 | 0.280  | -4.791 | 1.00 | 0.00 |
| ATOM | 11 | QG1  | VALM | 1 | -0.991 | 1.244  | -7.088 | 1.00 | 0.00 |
| ATOM | 12 | QG2  | VALM | 1 | 0.985  | -0.347 | -5.256 | 1.00 | 0.00 |
| ATOM | 13 | CG1  | VALM | 1 | -0.901 | 1.169  | -6.682 | 1.00 | 0.00 |
| ATOM | 14 | 1HG1 | VALM | 1 | -1.347 | 2.173  | -6.814 | 1.00 | 0.00 |
| ATOM | 15 | 2HG1 | VALM | 1 | -0.011 | 1.118  | -7.338 | 1.00 | 0.00 |
| ATOM | 16 | 3HG1 | VALM | 1 | -1.613 | 0.439  | -7.111 | 1.00 | 0.00 |
| ATOM | 17 | CG2  | VALM | 1 | 0.660  | -0.091 | -5.249 | 1.00 | 0.00 |
| ATOM | 18 | 1HG2 | VALM | 1 | 1.100  | -0.154 | -6.262 | 1.00 | 0.00 |
| ATOM | 19 | 2HG2 | VALM | 1 | 1.464  | 0.231  | -4.564 | 1.00 | 0.00 |
| ATOM | 20 | 3HG2 | VALM | 1 | 0.391  | -1.119 | -4.942 | 1.00 | 0.00 |
| ATOM | 21 | QQG  | VALM | 1 | -0.003 | 0.448  | -6.172 | 1.00 | 0.00 |
| ATOM | 22 | C    | VALM | 1 | 0.599  | 1.784  | -3.127 | 1.00 | 0.00 |
| ATOM | 23 | O    | VALM | 1 | 1.599  | 2.480  | -2.958 | 1.00 | 0.00 |
| ATOM | 24 | N    | PRO  | 2 | 0.269  | 0.710  | -2.361 | 1.00 | 0.00 |
| ATOM | 25 | CD   | PRO  | 2 | -0.908 | -0.136 | -2.531 | 1.00 | 0.00 |
| ATOM | 26 | CA   | PRO  | 2 | 1.109  | 0.298  | -1.249 | 1.00 | 0.00 |
| ATOM | 27 | HA   | PRO  | 2 | 1.424  | 1.098  | -0.736 | 1.00 | 0.00 |
| ATOM | 28 | CB   | PRO  | 2 | 0.226  | -0.602 | -0.401 | 1.00 | 0.00 |
| ATOM | 29 | 2HB  | PRO  | 2 | -0.147 | -0.071 | 0.475  | 1.00 | 0.00 |
| ATOM | 30 | QB   | PRO  | 2 | -0.147 | -0.071 | 0.475  | 1.00 | 0.00 |
| ATOM | 31 | CG   | PRO  | 2 | -0.918 | -1.034 | -1.304 | 1.00 | 0.00 |
| ATOM | 32 | 2HG  | PRO  | 2 | -1.870 | -0.954 | -0.779 | 1.00 | 0.00 |
| ATOM | 33 | QG   | PRO  | 2 | -1.870 | -0.954 | -0.779 | 1.00 | 0.00 |
| ATOM | 34 | 2HD  | PRO  | 2 | -1.819 | 0.458  | -2.594 | 1.00 | 0.00 |
| ATOM | 35 | QD   | PRO  | 2 | -1.819 | 0.458  | -2.594 | 1.00 | 0.00 |
| ATOM | 36 | C    | PRO  | 2 | 2.374  | -0.402 | -1.748 | 1.00 | 0.00 |
| ATOM | 37 | O    | PRO  | 2 | 2.396  | -0.937 | -2.856 | 1.00 | 0.00 |
| ATOM | 38 | N    | ILE  | 3 | 3.397  | -0.378 | -0.906 | 1.00 | 0.00 |
| ATOM | 39 | H    | ILE  | 3 | 3.371  | 0.059  | -0.006 | 1.00 | 0.00 |
| ATOM | 40 | CA   | ILE  | 3 | 4.663  | -1.004 | -1.247 | 1.00 | 0.00 |
| ATOM | 41 | HA   | ILE  | 3 | 4.649  | -1.205 | -2.318 | 1.00 | 0.00 |
| ATOM | 42 | CB   | ILE  | 3 | 5.825  | -0.044 | -0.982 | 1.00 | 0.00 |
| ATOM | 43 | HB   | ILE  | 3 | 6.536  | -0.544 | -0.324 | 1.00 | 0.00 |
| ATOM | 44 | QG2  | ILE  | 3 | 6.742  | 0.370  | -2.585 | 1.00 | 0.00 |
| ATOM | 45 | CG2  | ILE  | 3 | 6.566  | 0.291  | -2.277 | 1.00 | 0.00 |
| ATOM | 46 | 1HG2 | ILE  | 3 | 5.872  | 0.242  | -3.117 | 1.00 | 0.00 |
| ATOM | 47 | 2HG2 | ILE  | 3 | 6.982  | 1.296  | -2.208 | 1.00 | 0.00 |
| ATOM | 48 | 3HG2 | ILE  | 3 | 7.372  | -0.426 | -2.431 | 1.00 | 0.00 |
| ATOM | 49 | CG1  | ILE  | 3 | 5.342  | 1.213  | -0.255 | 1.00 | 0.00 |
| ATOM | 50 | 2HG1 | ILE  | 3 | 4.381  | 1.526  | -0.663 | 1.00 | 0.00 |
| ATOM | 51 | QG1  | ILE  | 3 | 4.381  | 1.526  | -0.663 | 1.00 | 0.00 |
| ATOM | 52 | QD1  | ILE  | 3 | 5.175  | 0.900  | 1.604  | 1.00 | 0.00 |
| ATOM | 53 | CD1  | ILE  | 3 | 5.207  | 0.960  | 1.247  | 1.00 | 0.00 |
| ATOM | 54 | 1HD1 | ILE  | 3 | 5.639  | -0.010 | 1.493  | 1.00 | 0.00 |
| ATOM | 55 | 2HD1 | ILE  | 3 | 5.733  | 1.741  | 1.796  | 1.00 | 0.00 |
| ATOM | 56 | 3HD1 | ILE  | 3 | 4.152  | 0.968  | 1.524  | 1.00 | 0.00 |
| ATOM | 57 | C    | ILE  | 3 | 4.784  | -2.337 | -0.506 | 1.00 | 0.00 |
| ATOM | 58 | O    | ILE  | 3 | 5.263  | -3.356 | -1.023 | 1.00 | 0.00 |
| ATOM | 59 | N    | PIP  | 4 | 4.338  | -2.326 | 0.737  | 1.00 | 0.00 |
| ATOM | 60 | CE   | PIP  | 4 | 3.777  | -1.144 | 1.351  | 1.00 | 0.00 |

|      |     |      |      |   |        |        |        |      |      |
|------|-----|------|------|---|--------|--------|--------|------|------|
| ATOM | 61  | CA   | PIP  | 4 | 4.389  | -3.499 | 1.596  | 1.00 | 0.00 |
| ATOM | 62  | HA   | PIP  | 4 | 5.377  | -3.962 | 1.586  | 1.00 | 0.00 |
| ATOM | 63  | CB   | PIP  | 4 | 4.066  | -3.146 | 3.060  | 1.00 | 0.00 |
| ATOM | 64  | 2HB  | PIP  | 4 | 4.114  | -4.047 | 3.671  | 1.00 | 0.00 |
| ATOM | 65  | 3HB  | PIP  | 4 | 4.790  | -2.419 | 3.427  | 1.00 | 0.00 |
| ATOM | 66  | QB   | PIP  | 4 | 4.452  | -3.233 | 3.549  | 1.00 | 0.00 |
| ATOM | 67  | CG   | PIP  | 4 | 2.650  | -2.545 | 3.142  | 1.00 | 0.00 |
| ATOM | 68  | 2HG  | PIP  | 4 | 2.422  | -2.295 | 4.178  | 1.00 | 0.00 |
| ATOM | 69  | 3HG  | PIP  | 4 | 1.925  | -3.272 | 2.776  | 1.00 | 0.00 |
| ATOM | 70  | QG   | PIP  | 4 | 2.173  | -2.784 | 3.477  | 1.00 | 0.00 |
| ATOM | 71  | CD   | PIP  | 4 | 2.626  | -1.549 | 2.292  | 1.00 | 0.00 |
| ATOM | 72  | 2HD  | PIP  | 4 | 2.202  | -0.658 | 2.755  | 1.00 | 0.00 |
| ATOM | 73  | 3HD  | PIP  | 4 | 1.853  | -2.062 | 1.719  | 1.00 | 0.00 |
| ATOM | 74  | QD   | PIP  | 4 | 2.028  | -1.360 | 2.237  | 1.00 | 0.00 |
| ATOM | 75  | 1HE  | PIP  | 4 | 4.548  | -0.630 | 1.925  | 1.00 | 0.00 |
| ATOM | 76  | 2HE  | PIP  | 4 | 3.395  | -0.477 | 0.578  | 1.00 | 0.00 |
| ATOM | 77  | QE   | PIP  | 4 | 3.972  | -0.554 | 1.251  | 1.00 | 0.00 |
| ATOM | 78  | C    | PIP  | 4 | 3.380  | -4.572 | 1.153  | 1.00 | 0.00 |
| ATOM | 79  | O    | PIP  | 4 | 2.688  | -4.276 | 0.180  | 1.00 | 0.00 |
| ATOM | 80  | N    | ALA  | 5 | 3.307  | -5.723 | 1.804  | 1.00 | 0.00 |
| ATOM | 81  | H    | ALA  | 5 | 3.874  | -5.956 | 2.594  | 1.00 | 0.00 |
| ATOM | 82  | CA   | ALA  | 5 | 2.368  | -6.754 | 1.397  | 1.00 | 0.00 |
| ATOM | 83  | HA   | ALA  | 5 | 2.771  | -7.239 | 0.508  | 1.00 | 0.00 |
| ATOM | 84  | QB   | ALA  | 5 | 2.210  | -8.044 | 2.774  | 1.00 | 0.00 |
| ATOM | 85  | CB   | ALA  | 5 | 2.240  | -7.797 | 2.510  | 1.00 | 0.00 |
| ATOM | 86  | 1HB  | ALA  | 5 | 2.930  | -7.552 | 3.318  | 1.00 | 0.00 |
| ATOM | 87  | 2HB  | ALA  | 5 | 1.219  | -7.798 | 2.891  | 1.00 | 0.00 |
| ATOM | 88  | 3HB  | ALA  | 5 | 2.480  | -8.783 | 2.113  | 1.00 | 0.00 |
| ATOM | 89  | C    | ALA  | 5 | 1.026  | -6.107 | 1.047  | 1.00 | 0.00 |
| ATOM | 90  | O    | ALA  | 5 | 0.694  | -5.042 | 1.564  | 1.00 | 0.00 |
| ATOM | 91  | N    | PRO  | 6 | 0.273  | -6.796 | 0.150  | 1.00 | 0.00 |
| ATOM | 92  | CD   | PRO  | 6 | 0.634  | -8.061 | -0.484 | 1.00 | 0.00 |
| ATOM | 93  | CA   | PRO  | 6 | -1.025 | -6.300 | -0.275 | 1.00 | 0.00 |
| ATOM | 94  | HA   | PRO  | 6 | -0.984 | -5.313 | -0.433 | 1.00 | 0.00 |
| ATOM | 95  | CB   | PRO  | 6 | -1.339 | -7.061 | -1.553 | 1.00 | 0.00 |
| ATOM | 96  | 2HB  | PRO  | 6 | -1.155 | -6.444 | -2.432 | 1.00 | 0.00 |
| ATOM | 97  | QB   | PRO  | 6 | -1.155 | -6.444 | -2.432 | 1.00 | 0.00 |
| ATOM | 98  | CG   | PRO  | 6 | -0.431 | -8.281 | -1.545 | 1.00 | 0.00 |
| ATOM | 99  | 2HG  | PRO  | 6 | 0.028  | -8.421 | -2.523 | 1.00 | 0.00 |
| ATOM | 100 | QG   | PRO  | 6 | 0.028  | -8.421 | -2.523 | 1.00 | 0.00 |
| ATOM | 101 | 2HD  | PRO  | 6 | 1.630  | -8.013 | -0.925 | 1.00 | 0.00 |
| ATOM | 102 | QD   | PRO  | 6 | 1.630  | -8.013 | -0.925 | 1.00 | 0.00 |
| ATOM | 103 | C    | PRO  | 6 | -2.076 | -6.506 | 0.817  | 1.00 | 0.00 |
| ATOM | 104 | O    | PRO  | 6 | -2.368 | -7.620 | 1.269  | 1.00 | 0.00 |
| ATOM | 105 | N    | THRM | 7 | -2.655 | -5.402 | 1.249  | 1.00 | 0.00 |
| ATOM | 106 | QB   | THRM | 7 | -3.927 | -5.620 | 2.567  | 1.00 | 0.00 |
| ATOM | 107 | CN   | THRM | 7 | -3.676 | -5.577 | 2.307  | 1.00 | 0.00 |
| ATOM | 108 | 1HNB | THRM | 7 | -3.770 | -6.635 | 2.551  | 1.00 | 0.00 |
| ATOM | 109 | 2HNB | THRM | 7 | -3.375 | -5.025 | 3.198  | 1.00 | 0.00 |
| ATOM | 110 | 3HNB | THRM | 7 | -4.636 | -5.199 | 1.954  | 1.00 | 0.00 |
| ATOM | 111 | CA   | THRM | 7 | -2.311 | -4.088 | 0.716  | 1.00 | 0.00 |
| ATOM | 112 | HA   | THRM | 7 | -1.216 | -4.046 | 0.574  | 1.00 | 0.00 |
| ATOM | 113 | CB   | THRM | 7 | -3.007 | -3.856 | -0.667 | 1.00 | 0.00 |
| ATOM | 114 | HB   | THRM | 7 | -3.508 | -2.865 | -0.645 | 1.00 | 0.00 |
| ATOM | 115 | QG2  | THRM | 7 | -1.846 | -3.926 | -2.245 | 1.00 | 0.00 |
| ATOM | 116 | OG1  | THRM | 7 | -3.990 | -4.856 | -0.904 | 1.00 | 0.00 |
| ATOM | 117 | 1HG  | THRM | 7 | -4.712 | -4.417 | -1.363 | 1.00 | 0.00 |
| ATOM | 118 | CG2  | THRM | 7 | -2.093 | -3.909 | -1.911 | 1.00 | 0.00 |
| ATOM | 119 | 1HG2 | THRM | 7 | -1.023 | -3.935 | -1.639 | 1.00 | 0.00 |

|      |     |      |      |    |        |        |        |      |      |
|------|-----|------|------|----|--------|--------|--------|------|------|
| ATOM | 120 | 2HG2 | THRM | 7  | -2.269 | -4.812 | -2.526 | 1.00 | 0.00 |
| ATOM | 121 | 3HG2 | THRM | 7  | -2.245 | -3.033 | -2.569 | 1.00 | 0.00 |
| ATOM | 122 | C    | THRM | 7  | -2.683 | -2.995 | 1.689  | 1.00 | 0.00 |
| ATOM | 123 | O    | THRM | 7  | -3.521 | -3.218 | 2.561  | 1.00 | 0.00 |
| ATOM | 124 | N    | VAL  | 8  | -2.057 | -1.837 | 1.530  | 1.00 | 0.00 |
| ATOM | 125 | H    | VAL  | 8  | -1.376 | -1.664 | 0.818  | 1.00 | 0.00 |
| ATOM | 126 | CA   | VAL  | 8  | -2.331 | -0.711 | 2.406  | 1.00 | 0.00 |
| ATOM | 127 | HA   | VAL  | 8  | -3.329 | -0.852 | 2.821  | 1.00 | 0.00 |
| ATOM | 128 | CB   | VAL  | 8  | -1.334 | -0.697 | 3.566  | 1.00 | 0.00 |
| ATOM | 129 | HB   | VAL  | 8  | -1.113 | 0.343  | 3.806  | 1.00 | 0.00 |
| ATOM | 130 | QG1  | VAL  | 8  | -2.077 | -1.505 | 5.109  | 1.00 | 0.00 |
| ATOM | 131 | QG2  | VAL  | 8  | 0.290  | -1.538 | 3.076  | 1.00 | 0.00 |
| ATOM | 132 | CG1  | VAL  | 8  | -1.934 | -1.350 | 4.813  | 1.00 | 0.00 |
| ATOM | 133 | 1HG1 | VAL  | 8  | -1.922 | -0.637 | 5.638  | 1.00 | 0.00 |
| ATOM | 134 | 2HG1 | VAL  | 8  | -2.961 | -1.650 | 4.607  | 1.00 | 0.00 |
| ATOM | 135 | 3HG1 | VAL  | 8  | -1.347 | -2.227 | 5.083  | 1.00 | 0.00 |
| ATOM | 136 | CG2  | VAL  | 8  | -0.021 | -1.377 | 3.171  | 1.00 | 0.00 |
| ATOM | 137 | 1HG2 | VAL  | 8  | 0.331  | -0.963 | 2.225  | 1.00 | 0.00 |
| ATOM | 138 | 2HG2 | VAL  | 8  | 0.726  | -1.203 | 3.944  | 1.00 | 0.00 |
| ATOM | 139 | 3HG2 | VAL  | 8  | -0.186 | -2.449 | 3.058  | 1.00 | 0.00 |
| ATOM | 140 | QQG  | VAL  | 8  | -0.893 | -1.521 | 4.093  | 1.00 | 0.00 |
| ATOM | 141 | C    | VAL  | 8  | -2.315 | 0.581  | 1.588  | 1.00 | 0.00 |
| ATOM | 142 | O    | VAL  | 8  | -1.938 | 0.629  | 0.411  | 1.00 | 0.00 |
| ATOM | 143 | N    | THRM | 9  | -2.734 | 1.654  | 2.232  | 1.00 | 0.00 |
| ATOM | 144 | QB   | THRM | 9  | -3.256 | 1.394  | 3.981  | 1.00 | 0.00 |
| ATOM | 145 | CN   | THRM | 9  | -3.153 | 1.445  | 3.636  | 1.00 | 0.00 |
| ATOM | 146 | 1HNB | THRM | 9  | -3.035 | 0.394  | 3.899  | 1.00 | 0.00 |
| ATOM | 147 | 2HNB | THRM | 9  | -2.536 | 2.056  | 4.295  | 1.00 | 0.00 |
| ATOM | 148 | 3HNB | THRM | 9  | -4.198 | 1.732  | 3.750  | 1.00 | 0.00 |
| ATOM | 149 | CA   | THRM | 9  | -2.782 | 2.968  | 1.598  | 1.00 | 0.00 |
| ATOM | 150 | HA   | THRM | 9  | -2.496 | 2.853  | 0.536  | 1.00 | 0.00 |
| ATOM | 151 | CB   | THRM | 9  | -4.231 | 3.560  | 1.666  | 1.00 | 0.00 |
| ATOM | 152 | HB   | THRM | 9  | -4.232 | 4.543  | 1.148  | 1.00 | 0.00 |
| ATOM | 153 | QG2  | THRM | 9  | -5.658 | 2.454  | 0.903  | 1.00 | 0.00 |
| ATOM | 154 | OG1  | THRM | 9  | -4.622 | 3.760  | 3.019  | 1.00 | 0.00 |
| ATOM | 155 | 1HG  | THRM | 9  | -3.992 | 4.385  | 3.390  | 1.00 | 0.00 |
| ATOM | 156 | CG2  | THRM | 9  | -5.354 | 2.691  | 1.063  | 1.00 | 0.00 |
| ATOM | 157 | 1HG2 | THRM | 9  | -5.087 | 1.619  | 1.044  | 1.00 | 0.00 |
| ATOM | 158 | 2HG2 | THRM | 9  | -6.295 | 2.754  | 1.642  | 1.00 | 0.00 |
| ATOM | 159 | 3HG2 | THRM | 9  | -5.591 | 2.989  | 0.024  | 1.00 | 0.00 |
| ATOM | 160 | C    | THRM | 9  | -1.789 | 3.912  | 2.232  | 1.00 | 0.00 |
| ATOM | 161 | O    | THRM | 9  | -2.141 | 4.856  | 2.911  | 1.00 | 0.00 |
| ATOM | 162 | N    | VALM | 10 | -0.515 | 3.651  | 2.004  | 1.00 | 0.00 |
| ATOM | 163 | QB   | VALM | 10 | -0.168 | 2.179  | 0.950  | 1.00 | 0.00 |
| ATOM | 164 | CN   | VALM | 10 | -0.237 | 2.469  | 1.159  | 1.00 | 0.00 |
| ATOM | 165 | 1HNB | VALM | 10 | 0.812  | 2.474  | 0.861  | 1.00 | 0.00 |
| ATOM | 166 | 2HNB | VALM | 10 | -0.450 | 1.561  | 1.720  | 1.00 | 0.00 |
| ATOM | 167 | 3HNB | VALM | 10 | -0.866 | 2.503  | 0.268  | 1.00 | 0.00 |
| ATOM | 168 | CA   | VALM | 10 | 0.554  | 4.479  | 2.554  | 1.00 | 0.00 |
| ATOM | 169 | HA   | VALM | 10 | 0.200  | 5.524  | 2.617  | 1.00 | 0.00 |
| ATOM | 170 | CB   | VALM | 10 | 0.938  | 3.969  | 4.000  | 1.00 | 0.00 |
| ATOM | 171 | HB   | VALM | 10 | 1.879  | 3.385  | 3.902  | 1.00 | 0.00 |
| ATOM | 172 | QG1  | VALM | 10 | 1.273  | 5.359  | 5.363  | 1.00 | 0.00 |
| ATOM | 173 | QG2  | VALM | 10 | -0.404 | 2.782  | 4.799  | 1.00 | 0.00 |
| ATOM | 174 | CG1  | VALM | 10 | 1.208  | 5.064  | 5.067  | 1.00 | 0.00 |
| ATOM | 175 | 1HG1 | VALM | 10 | 2.079  | 5.699  | 4.812  | 1.00 | 0.00 |
| ATOM | 176 | 2HG1 | VALM | 10 | 0.342  | 5.739  | 5.207  | 1.00 | 0.00 |
| ATOM | 177 | 3HG1 | VALM | 10 | 1.400  | 4.639  | 6.071  | 1.00 | 0.00 |
| ATOM | 178 | CG2  | VALM | 10 | -0.117 | 3.032  | 4.634  | 1.00 | 0.00 |

|      |     |      |      |    |        |       |        |      |      |
|------|-----|------|------|----|--------|-------|--------|------|------|
| ATOM | 179 | 1HG2 | VALM | 10 | 0.252  | 2.551 | 5.559  | 1.00 | 0.00 |
| ATOM | 180 | 2HG2 | VALM | 10 | -1.045 | 3.573 | 4.895  | 1.00 | 0.00 |
| ATOM | 181 | 3HG2 | VALM | 10 | -0.419 | 2.223 | 3.941  | 1.00 | 0.00 |
| ATOM | 182 | QOG  | VALM | 10 | 0.435  | 4.071 | 5.081  | 1.00 | 0.00 |
| ATOM | 183 | C    | VALM | 10 | 1.761  | 4.476 | 1.645  | 1.00 | 0.00 |
| ATOM | 184 | O    | VALM | 10 | 2.846  | 3.998 | 1.998  | 1.00 | 0.00 |
| ATOM | 185 | N    | ILEM | 11 | 1.588  | 5.015 | 0.453  | 1.00 | 0.00 |
| ATOM | 186 | QB   | ILEM | 11 | -0.096 | 5.678 | 0.102  | 1.00 | 0.00 |
| ATOM | 187 | CN   | ILEM | 11 | 0.236  | 5.547 | 0.171  | 1.00 | 0.00 |
| ATOM | 188 | 1HNB | ILEM | 11 | -0.405 | 5.391 | 1.039  | 1.00 | 0.00 |
| ATOM | 189 | 2HNB | ILEM | 11 | 0.302  | 6.613 | -0.045 | 1.00 | 0.00 |
| ATOM | 190 | 3HNB | ILEM | 11 | -0.186 | 5.029 | -0.689 | 1.00 | 0.00 |
| ATOM | 191 | CA   | ILEM | 11 | 2.667  | 5.083 | -0.528 | 1.00 | 0.00 |
| ATOM | 192 | HA   | ILEM | 11 | 2.282  | 5.629 | -1.410 | 1.00 | 0.00 |
| ATOM | 193 | CB   | ILEM | 11 | 3.915  | 5.871 | 0.040  | 1.00 | 0.00 |
| ATOM | 194 | HB   | ILEM | 11 | 3.710  | 6.058 | 1.115  | 1.00 | 0.00 |
| ATOM | 195 | QG2  | ILEM | 11 | 5.601  | 4.830 | -0.086 | 1.00 | 0.00 |
| ATOM | 196 | CG2  | ILEM | 11 | 5.241  | 5.052 | -0.052 | 1.00 | 0.00 |
| ATOM | 197 | 1HG2 | ILEM | 11 | 5.302  | 4.454 | -0.978 | 1.00 | 0.00 |
| ATOM | 198 | 2HG2 | ILEM | 11 | 6.144  | 5.688 | -0.076 | 1.00 | 0.00 |
| ATOM | 199 | 3HG2 | ILEM | 11 | 5.356  | 4.350 | 0.795  | 1.00 | 0.00 |
| ATOM | 200 | CG1  | ILEM | 11 | 4.161  | 7.267 | -0.619 | 1.00 | 0.00 |
| ATOM | 201 | 2HG1 | ILEM | 11 | 3.893  | 7.220 | -1.692 | 1.00 | 0.00 |
| ATOM | 202 | QG1  | ILEM | 11 | 3.893  | 7.220 | -1.692 | 1.00 | 0.00 |
| ATOM | 203 | QD1  | ILEM | 11 | 3.128  | 8.749 | 0.124  | 1.00 | 0.00 |
| ATOM | 204 | CD1  | ILEM | 11 | 3.350  | 8.440 | -0.032 | 1.00 | 0.00 |
| ATOM | 205 | 1HD1 | ILEM | 11 | 2.264  | 8.275 | -0.154 | 1.00 | 0.00 |
| ATOM | 206 | 2HD1 | ILEM | 11 | 3.539  | 8.569 | 1.051  | 1.00 | 0.00 |
| ATOM | 207 | 3HD1 | ILEM | 11 | 3.580  | 9.402 | -0.525 | 1.00 | 0.00 |
| ATOM | 208 | C    | ILEM | 11 | 3.046  | 3.703 | -1.012 | 1.00 | 0.00 |
| ATOM | 209 | O    | ILEM | 11 | 2.772  | 2.682 | -0.364 | 1.00 | 0.00 |
| ATOM | 210 | N    | PIPO | 12 | 3.686  | 3.649 | -2.165 | 1.00 | 0.00 |
| ATOM | 211 | CE   | PIPO | 12 | 4.116  | 2.403 | -2.759 | 1.00 | 0.00 |
| ATOM | 212 | CA   | PIPO | 12 | 4.028  | 4.842 | -2.926 | 1.00 | 0.00 |
| ATOM | 213 | HA   | PIPO | 12 | 4.505  | 5.596 | -2.299 | 1.00 | 0.00 |
| ATOM | 214 | CB   | PIPO | 12 | 5.000  | 4.522 | -4.076 | 1.00 | 0.00 |
| ATOM | 215 | 2HB  | PIPO | 12 | 5.232  | 5.436 | -4.621 | 1.00 | 0.00 |
| ATOM | 216 | 3HB  | PIPO | 12 | 5.919  | 4.100 | -3.668 | 1.00 | 0.00 |
| ATOM | 217 | QB   | PIPO | 12 | 5.576  | 4.768 | -4.145 | 1.00 | 0.00 |
| ATOM | 218 | CG   | PIPO | 12 | 4.349  | 3.505 | -5.032 | 1.00 | 0.00 |
| ATOM | 219 | 2HG  | PIPO | 12 | 5.038  | 3.279 | -5.846 | 1.00 | 0.00 |
| ATOM | 220 | 3HG  | PIPO | 12 | 3.431  | 3.927 | -5.440 | 1.00 | 0.00 |
| ATOM | 221 | QG   | PIPO | 12 | 4.234  | 3.603 | -5.643 | 1.00 | 0.00 |
| ATOM | 222 | CD   | PIPO | 12 | 3.983  | 2.490 | -4.290 | 1.00 | 0.00 |
| ATOM | 223 | 2HD  | PIPO | 12 | 4.306  | 1.550 | -4.737 | 1.00 | 0.00 |
| ATOM | 224 | 3HD  | PIPO | 12 | 2.941  | 2.678 | -4.555 | 1.00 | 0.00 |
| ATOM | 225 | QD   | PIPO | 12 | 3.624  | 2.114 | -4.646 | 1.00 | 0.00 |
| ATOM | 226 | 1HE  | PIPO | 12 | 5.156  | 2.213 | -2.496 | 1.00 | 0.00 |
| ATOM | 227 | 2HE  | PIPO | 12 | 3.493  | 1.589 | -2.386 | 1.00 | 0.00 |
| ATOM | 228 | QE   | PIPO | 12 | 4.325  | 1.901 | -2.441 | 1.00 | 0.00 |
| ATOM | 229 | C    | PIPO | 12 | 2.781  | 5.491 | -3.551 | 1.00 | 0.00 |
| ATOM | 230 | O    | PIPO | 12 | 2.626  | 6.710 | -3.401 | 1.00 | 0.00 |
| ATOM | 231 | O1'  | PHEO | 13 | 1.921  | 4.755 | -4.229 | 1.00 | 0.00 |
| ATOM | 232 | CA   | PHEO | 13 | 0.527  | 5.153 | -4.399 | 1.00 | 0.00 |
| ATOM | 233 | HA   | PHEO | 13 | 0.469  | 6.079 | -5.002 | 1.00 | 0.00 |
| ATOM | 234 | CB   | PHEO | 13 | -0.106 | 5.392 | -2.996 | 1.00 | 0.00 |
| ATOM | 235 | 2HB  | PHEO | 13 | 0.676  | 5.751 | -2.296 | 1.00 | 0.00 |
| ATOM | 236 | QB   | PHEO | 13 | 0.676  | 5.751 | -2.296 | 1.00 | 0.00 |
| ATOM | 237 | QD   | PHEO | 13 | -1.412 | 6.487 | -2.908 | 1.00 | 0.00 |

Supplementary Material for Organic & Biomolecular Chemistry  
 This journal is © The Royal Society of Chemistry 2006

|        |     |      |      |    |        |        |        |      |      |
|--------|-----|------|------|----|--------|--------|--------|------|------|
| ATOM   | 238 | QE   | PHEO | 13 | -3.251 | 8.113  | -2.726 | 1.00 | 0.00 |
| ATOM   | 239 | QR   | PHEO | 13 | -2.700 | 7.626  | -2.781 | 1.00 | 0.00 |
| ATOM   | 240 | CG   | PHEO | 13 | -1.292 | 6.366  | -2.937 | 1.00 | 0.00 |
| ATOM   | 241 | CD1  | PHEO | 13 | -1.186 | 7.624  | -3.539 | 1.00 | 0.00 |
| ATOM   | 242 | 1HD  | PHEO | 13 | -0.278 | 7.903  | -4.059 | 1.00 | 0.00 |
| ATOM   | 243 | CE1  | PHEO | 13 | -2.219 | 8.547  | -3.426 | 1.00 | 0.00 |
| ATOM   | 244 | 1HE  | PHEO | 13 | -2.114 | 9.527  | -3.869 | 1.00 | 0.00 |
| ATOM   | 245 | CZ   | PHEO | 13 | -3.376 | 8.212  | -2.726 | 1.00 | 0.00 |
| ATOM   | 246 | HZ   | PHEO | 13 | -4.176 | 8.931  | -2.635 | 1.00 | 0.00 |
| ATOM   | 247 | CE2  | PHEO | 13 | -3.495 | 6.955  | -2.133 | 1.00 | 0.00 |
| ATOM   | 248 | 2HE  | PHEO | 13 | -4.389 | 6.698  | -1.584 | 1.00 | 0.00 |
| ATOM   | 249 | CD2  | PHEO | 13 | -2.455 | 6.035  | -2.237 | 1.00 | 0.00 |
| ATOM   | 250 | 2HD  | PHEO | 13 | -2.546 | 5.070  | -1.757 | 1.00 | 0.00 |
| ATOM   | 251 | C    | PHEO | 13 | -0.264 | 4.070  | -5.092 | 1.00 | 0.00 |
| ATOM   | 252 | O    | PHEO | 13 | -1.464 | 4.242  | -5.448 | 1.00 | 0.00 |
| TER    |     |      |      |    |        |        |        |      |      |
| ENDMDL |     |      |      |    |        |        |        |      |      |
| MODEL  |     |      |      |    |        |        |        |      |      |
|        | 8   |      |      |    |        |        |        |      |      |
| ATOM   | 1   | N    | VALM | 1  | -0.664 | 3.408  | -4.473 | 1.00 | 0.00 |
| ATOM   | 2   | QB   | VALM | 1  | -2.384 | 4.071  | -4.437 | 1.00 | 0.00 |
| ATOM   | 3   | CN   | VALM | 1  | -2.045 | 3.941  | -4.445 | 1.00 | 0.00 |
| ATOM   | 4   | 1HNB | VALM | 1  | -2.382 | 4.021  | -3.411 | 1.00 | 0.00 |
| ATOM   | 5   | 2HNB | VALM | 1  | -2.065 | 4.925  | -4.910 | 1.00 | 0.00 |
| ATOM   | 6   | 3HNB | VALM | 1  | -2.705 | 3.267  | -4.989 | 1.00 | 0.00 |
| ATOM   | 7   | CA   | VALM | 1  | -0.385 | 1.979  | -4.366 | 1.00 | 0.00 |
| ATOM   | 8   | HA   | VALM | 1  | -1.326 | 1.448  | -4.138 | 1.00 | 0.00 |
| ATOM   | 9   | CB   | VALM | 1  | 0.201  | 1.444  | -5.732 | 1.00 | 0.00 |
| ATOM   | 10  | HB   | VALM | 1  | 1.020  | 2.134  | -6.031 | 1.00 | 0.00 |
| ATOM   | 11  | QG1  | VALM | 1  | 0.992  | -0.366 | -5.697 | 1.00 | 0.00 |
| ATOM   | 12  | QG2  | VALM | 1  | -1.096 | 1.416  | -7.204 | 1.00 | 0.00 |
| ATOM   | 13  | CG1  | VALM | 1  | 0.815  | 0.017  | -5.707 | 1.00 | 0.00 |
| ATOM   | 14  | 1HG1 | VALM | 1  | 0.108  | -0.755 | -6.065 | 1.00 | 0.00 |
| ATOM   | 15  | 2HG1 | VALM | 1  | 1.726  | -0.059 | -6.333 | 1.00 | 0.00 |
| ATOM   | 16  | 3HG1 | VALM | 1  | 1.141  | -0.284 | -4.694 | 1.00 | 0.00 |
| ATOM   | 17  | CG2  | VALM | 1  | -0.825 | 1.426  | -6.891 | 1.00 | 0.00 |
| ATOM   | 18  | 1HG2 | VALM | 1  | -1.684 | 2.097  | -6.701 | 1.00 | 0.00 |
| ATOM   | 19  | 2HG2 | VALM | 1  | -0.371 | 1.740  | -7.848 | 1.00 | 0.00 |
| ATOM   | 20  | 3HG2 | VALM | 1  | -1.232 | 0.411  | -7.063 | 1.00 | 0.00 |
| ATOM   | 21  | QQG  | VALM | 1  | -0.052 | 0.525  | -6.450 | 1.00 | 0.00 |
| ATOM   | 22  | C    | VALM | 1  | 0.567  | 1.699  | -3.227 | 1.00 | 0.00 |
| ATOM   | 23  | O    | VALM | 1  | 1.552  | 2.418  | -3.068 | 1.00 | 0.00 |
| ATOM   | 24  | N    | PRO  | 2  | 0.253  | 0.637  | -2.437 | 1.00 | 0.00 |
| ATOM   | 25  | CD   | PRO  | 2  | -0.905 | -0.239 | -2.596 | 1.00 | 0.00 |
| ATOM   | 26  | CA   | PRO  | 2  | 1.094  | 0.269  | -1.310 | 1.00 | 0.00 |
| ATOM   | 27  | HA   | PRO  | 2  | 1.388  | 1.086  | -0.815 | 1.00 | 0.00 |
| ATOM   | 28  | CB   | PRO  | 2  | 0.223  | -0.630 | -0.447 | 1.00 | 0.00 |
| ATOM   | 29  | 2HB  | PRO  | 2  | -0.168 | -0.086 | 0.413  | 1.00 | 0.00 |
| ATOM   | 30  | QB   | PRO  | 2  | -0.168 | -0.086 | 0.413  | 1.00 | 0.00 |
| ATOM   | 31  | CG   | PRO  | 2  | -0.905 | -1.107 | -1.347 | 1.00 | 0.00 |
| ATOM   | 32  | 2HG  | PRO  | 2  | -1.863 | -1.034 | -0.832 | 1.00 | 0.00 |
| ATOM   | 33  | QG   | PRO  | 2  | -1.863 | -1.034 | -0.832 | 1.00 | 0.00 |
| ATOM   | 34  | 2HD  | PRO  | 2  | -1.827 | 0.336  | -2.678 | 1.00 | 0.00 |
| ATOM   | 35  | QD   | PRO  | 2  | -1.827 | 0.336  | -2.678 | 1.00 | 0.00 |
| ATOM   | 36  | C    | PRO  | 2  | 2.376  | -0.418 | -1.784 | 1.00 | 0.00 |
| ATOM   | 37  | O    | PRO  | 2  | 2.435  | -0.929 | -2.901 | 1.00 | 0.00 |
| ATOM   | 38  | N    | ILE  | 3  | 3.373  | -0.408 | -0.910 | 1.00 | 0.00 |
| ATOM   | 39  | H    | ILE  | 3  | 3.316  | 0.010  | -0.003 | 1.00 | 0.00 |
| ATOM   | 40  | CA   | ILE  | 3  | 4.650  | -1.023 | -1.224 | 1.00 | 0.00 |
| ATOM   | 41  | HA   | ILE  | 3  | 4.657  | -1.232 | -2.294 | 1.00 | 0.00 |

|      |     |      |     |   |        |        |        |      |      |
|------|-----|------|-----|---|--------|--------|--------|------|------|
| ATOM | 42  | CB   | ILE | 3 | 5.797  | -0.049 | -0.946 | 1.00 | 0.00 |
| ATOM | 43  | HB   | ILE | 3 | 6.496  | -0.530 | -0.263 | 1.00 | 0.00 |
| ATOM | 44  | QG2  | ILE | 3 | 6.751  | 0.347  | -2.533 | 1.00 | 0.00 |
| ATOM | 45  | CG2  | ILE | 3 | 6.568  | 0.271  | -2.229 | 1.00 | 0.00 |
| ATOM | 46  | 1HG2 | ILE | 3 | 5.893  | 0.209  | -3.082 | 1.00 | 0.00 |
| ATOM | 47  | 2HG2 | ILE | 3 | 6.980  | 1.278  | -2.162 | 1.00 | 0.00 |
| ATOM | 48  | 3HG2 | ILE | 3 | 7.379  | -0.446 | -2.353 | 1.00 | 0.00 |
| ATOM | 49  | CG1  | ILE | 3 | 5.286  | 1.216  | -0.253 | 1.00 | 0.00 |
| ATOM | 50  | 2HG1 | ILE | 3 | 4.329  | 1.510  | -0.686 | 1.00 | 0.00 |
| ATOM | 51  | QG1  | ILE | 3 | 4.329  | 1.510  | -0.686 | 1.00 | 0.00 |
| ATOM | 52  | QD1  | ILE | 3 | 5.085  | 0.936  | 1.608  | 1.00 | 0.00 |
| ATOM | 53  | CD1  | ILE | 3 | 5.124  | 0.990  | 1.251  | 1.00 | 0.00 |
| ATOM | 54  | 1HD1 | ILE | 3 | 5.573  | 0.036  | 1.526  | 1.00 | 0.00 |
| ATOM | 55  | 2HD1 | ILE | 3 | 5.618  | 1.795  | 1.795  | 1.00 | 0.00 |
| ATOM | 56  | 3HD1 | ILE | 3 | 4.063  | 0.978  | 1.504  | 1.00 | 0.00 |
| ATOM | 57  | C    | ILE | 3 | 4.773  | -2.349 | -0.470 | 1.00 | 0.00 |
| ATOM | 58  | O    | ILE | 3 | 5.265  | -3.369 | -0.974 | 1.00 | 0.00 |
| ATOM | 59  | N    | PIP | 4 | 4.314  | -2.331 | 0.768  | 1.00 | 0.00 |
| ATOM | 60  | CE   | PIP | 4 | 3.739  | -1.147 | 1.367  | 1.00 | 0.00 |
| ATOM | 61  | CA   | PIP | 4 | 4.365  | -3.496 | 1.637  | 1.00 | 0.00 |
| ATOM | 62  | HA   | PIP | 4 | 5.355  | -3.951 | 1.641  | 1.00 | 0.00 |
| ATOM | 63  | CB   | PIP | 4 | 4.023  | -3.133 | 3.094  | 1.00 | 0.00 |
| ATOM | 64  | 2HB  | PIP | 4 | 4.072  | -4.028 | 3.713  | 1.00 | 0.00 |
| ATOM | 65  | 3HB  | PIP | 4 | 4.739  | -2.398 | 3.462  | 1.00 | 0.00 |
| ATOM | 66  | QB   | PIP | 4 | 4.405  | -3.213 | 3.588  | 1.00 | 0.00 |
| ATOM | 67  | CG   | PIP | 4 | 2.603  | -2.542 | 3.157  | 1.00 | 0.00 |
| ATOM | 68  | 2HG  | PIP | 4 | 2.362  | -2.285 | 4.188  | 1.00 | 0.00 |
| ATOM | 69  | 3HG  | PIP | 4 | 1.887  | -3.277 | 2.789  | 1.00 | 0.00 |
| ATOM | 70  | QG   | PIP | 4 | 2.124  | -2.781 | 3.489  | 1.00 | 0.00 |
| ATOM | 71  | CD   | PIP | 4 | 2.581  | -1.553 | 2.297  | 1.00 | 0.00 |
| ATOM | 72  | 2HD  | PIP | 4 | 2.146  | -0.660 | 2.749  | 1.00 | 0.00 |
| ATOM | 73  | 3HD  | PIP | 4 | 1.817  | -2.075 | 1.722  | 1.00 | 0.00 |
| ATOM | 74  | QD   | PIP | 4 | 1.982  | -1.368 | 2.236  | 1.00 | 0.00 |
| ATOM | 75  | 1HE  | PIP | 4 | 4.501  | -0.623 | 1.943  | 1.00 | 0.00 |
| ATOM | 76  | 2HE  | PIP | 4 | 3.361  | -0.489 | 0.583  | 1.00 | 0.00 |
| ATOM | 77  | QE   | PIP | 4 | 3.931  | -0.556 | 1.263  | 1.00 | 0.00 |
| ATOM | 78  | C    | PIP | 4 | 3.368  | -4.579 | 1.192  | 1.00 | 0.00 |
| ATOM | 79  | O    | PIP | 4 | 2.701  | -4.307 | 0.195  | 1.00 | 0.00 |
| ATOM | 80  | N    | ALA | 5 | 3.277  | -5.715 | 1.867  | 1.00 | 0.00 |
| ATOM | 81  | H    | ALA | 5 | 3.823  | -5.930 | 2.677  | 1.00 | 0.00 |
| ATOM | 82  | CA   | ALA | 5 | 2.349  | -6.757 | 1.460  | 1.00 | 0.00 |
| ATOM | 83  | HA   | ALA | 5 | 2.778  | -7.264 | 0.596  | 1.00 | 0.00 |
| ATOM | 84  | QB   | ALA | 5 | 2.148  | -8.010 | 2.865  | 1.00 | 0.00 |
| ATOM | 85  | CB   | ALA | 5 | 2.187  | -7.769 | 2.596  | 1.00 | 0.00 |
| ATOM | 86  | 1HB  | ALA | 5 | 1.245  | -7.587 | 3.113  | 1.00 | 0.00 |
| ATOM | 87  | 2HB  | ALA | 5 | 2.186  | -8.778 | 2.184  | 1.00 | 0.00 |
| ATOM | 88  | 3HB  | ALA | 5 | 3.014  | -7.663 | 3.298  | 1.00 | 0.00 |
| ATOM | 89  | C    | ALA | 5 | 1.020  | -6.118 | 1.054  | 1.00 | 0.00 |
| ATOM | 90  | O    | ALA | 5 | 0.676  | -5.036 | 1.529  | 1.00 | 0.00 |
| ATOM | 91  | N    | PRO | 6 | 0.288  | -6.834 | 0.158  | 1.00 | 0.00 |
| ATOM | 92  | CD   | PRO | 6 | 0.664  | -8.118 | -0.425 | 1.00 | 0.00 |
| ATOM | 93  | CA   | PRO | 6 | -0.997 | -6.347 | -0.317 | 1.00 | 0.00 |
| ATOM | 94  | HA   | PRO | 6 | -0.949 | -5.366 | -0.503 | 1.00 | 0.00 |
| ATOM | 95  | CB   | PRO | 6 | -1.278 | -7.147 | -1.578 | 1.00 | 0.00 |
| ATOM | 96  | 2HB  | PRO | 6 | -1.068 | -6.557 | -2.470 | 1.00 | 0.00 |
| ATOM | 97  | QB   | PRO | 6 | -1.068 | -6.557 | -2.470 | 1.00 | 0.00 |
| ATOM | 98  | CG   | PRO | 6 | -0.374 | -8.367 | -1.508 | 1.00 | 0.00 |
| ATOM | 99  | 2HG  | PRO | 6 | 0.112  | -8.539 | -2.469 | 1.00 | 0.00 |
| ATOM | 100 | QG   | PRO | 6 | 0.112  | -8.539 | -2.469 | 1.00 | 0.00 |

|      |     |      |      |   |        |        |        |      |      |
|------|-----|------|------|---|--------|--------|--------|------|------|
| ATOM | 101 | 2HD  | PRO  | 6 | 1.670  | -8.085 | -0.841 | 1.00 | 0.00 |
| ATOM | 102 | QD   | PRO  | 6 | 1.670  | -8.085 | -0.841 | 1.00 | 0.00 |
| ATOM | 103 | C    | PRO  | 6 | -2.077 | -6.518 | 0.753  | 1.00 | 0.00 |
| ATOM | 104 | O    | PRO  | 6 | -2.457 | -7.624 | 1.156  | 1.00 | 0.00 |
| ATOM | 105 | N    | THRM | 7 | -2.581 | -5.392 | 1.222  | 1.00 | 0.00 |
| ATOM | 106 | QB   | THRM | 7 | -3.886 | -5.566 | 2.513  | 1.00 | 0.00 |
| ATOM | 107 | CN   | THRM | 7 | -3.628 | -5.531 | 2.258  | 1.00 | 0.00 |
| ATOM | 108 | 1HNB | THRM | 7 | -3.804 | -6.589 | 2.458  | 1.00 | 0.00 |
| ATOM | 109 | 2HNB | THRM | 7 | -3.302 | -5.039 | 3.174  | 1.00 | 0.00 |
| ATOM | 110 | 3HNB | THRM | 7 | -4.551 | -5.071 | 1.907  | 1.00 | 0.00 |
| ATOM | 111 | CA   | THRM | 7 | -2.132 | -4.087 | 0.746  | 1.00 | 0.00 |
| ATOM | 112 | HA   | THRM | 7 | -1.027 | -4.084 | 0.724  | 1.00 | 0.00 |
| ATOM | 113 | CB   | THRM | 7 | -2.664 | -3.816 | -0.702 | 1.00 | 0.00 |
| ATOM | 114 | HB   | THRM | 7 | -1.794 | -3.779 | -1.392 | 1.00 | 0.00 |
| ATOM | 115 | QG2  | THRM | 7 | -3.957 | -5.111 | -1.405 | 1.00 | 0.00 |
| ATOM | 116 | OG1  | THRM | 7 | -3.341 | -2.567 | -0.758 | 1.00 | 0.00 |
| ATOM | 117 | 1HG  | THRM | 7 | -4.162 | -2.687 | -0.272 | 1.00 | 0.00 |
| ATOM | 118 | CG2  | THRM | 7 | -3.682 | -4.835 | -1.259 | 1.00 | 0.00 |
| ATOM | 119 | 1HG2 | THRM | 7 | -3.378 | -5.878 | -1.059 | 1.00 | 0.00 |
| ATOM | 120 | 2HG2 | THRM | 7 | -4.684 | -4.722 | -0.803 | 1.00 | 0.00 |
| ATOM | 121 | 3HG2 | THRM | 7 | -3.808 | -4.732 | -2.353 | 1.00 | 0.00 |
| ATOM | 122 | C    | THRM | 7 | -2.567 | -2.989 | 1.688  | 1.00 | 0.00 |
| ATOM | 123 | O    | THRM | 7 | -3.395 | -3.235 | 2.563  | 1.00 | 0.00 |
| ATOM | 124 | N    | VAL  | 8 | -2.006 | -1.804 | 1.497  | 1.00 | 0.00 |
| ATOM | 125 | H    | VAL  | 8 | -1.334 | -1.612 | 0.782  | 1.00 | 0.00 |
| ATOM | 126 | CA   | VAL  | 8 | -2.345 | -0.671 | 2.340  | 1.00 | 0.00 |
| ATOM | 127 | HA   | VAL  | 8 | -3.365 | -0.819 | 2.696  | 1.00 | 0.00 |
| ATOM | 128 | CB   | VAL  | 8 | -1.419 | -0.629 | 3.558  | 1.00 | 0.00 |
| ATOM | 129 | HB   | VAL  | 8 | -1.209 | 0.416  | 3.783  | 1.00 | 0.00 |
| ATOM | 130 | QG1  | VAL  | 8 | -2.256 | -1.394 | 5.074  | 1.00 | 0.00 |
| ATOM | 131 | QG2  | VAL  | 8 | 0.228  | -1.486 | 3.186  | 1.00 | 0.00 |
| ATOM | 132 | CG1  | VAL  | 8 | -2.096 | -1.248 | 4.782  | 1.00 | 0.00 |
| ATOM | 133 | 1HG1 | VAL  | 8 | -2.340 | -0.463 | 5.498  | 1.00 | 0.00 |
| ATOM | 134 | 2HG1 | VAL  | 8 | -3.009 | -1.756 | 4.475  | 1.00 | 0.00 |
| ATOM | 135 | 3HG1 | VAL  | 8 | -1.419 | -1.965 | 5.248  | 1.00 | 0.00 |
| ATOM | 136 | CG2  | VAL  | 8 | -0.088 | -1.321 | 3.257  | 1.00 | 0.00 |
| ATOM | 137 | 1HG2 | VAL  | 8 | 0.258  | -1.029 | 2.266  | 1.00 | 0.00 |
| ATOM | 138 | 2HG2 | VAL  | 8 | 0.651  | -1.026 | 4.002  | 1.00 | 0.00 |
| ATOM | 139 | 3HG2 | VAL  | 8 | -0.226 | -2.402 | 3.291  | 1.00 | 0.00 |
| ATOM | 140 | QQG  | VAL  | 8 | -1.014 | -1.440 | 4.130  | 1.00 | 0.00 |
| ATOM | 141 | C    | VAL  | 8 | -2.297 | 0.612  | 1.508  | 1.00 | 0.00 |
| ATOM | 142 | O    | VAL  | 8 | -1.870 | 0.647  | 0.347  | 1.00 | 0.00 |
| ATOM | 143 | N    | THRM | 9 | -2.746 | 1.692  | 2.120  | 1.00 | 0.00 |
| ATOM | 144 | QB   | THRM | 9 | -3.343 | 1.452  | 3.848  | 1.00 | 0.00 |
| ATOM | 145 | CN   | THRM | 9 | -3.225 | 1.499  | 3.506  | 1.00 | 0.00 |
| ATOM | 146 | 1HNB | THRM | 9 | -3.116 | 0.452  | 3.787  | 1.00 | 0.00 |
| ATOM | 147 | 2HNB | THRM | 9 | -2.638 | 2.119  | 4.183  | 1.00 | 0.00 |
| ATOM | 148 | 3HNB | THRM | 9 | -4.275 | 1.784  | 3.572  | 1.00 | 0.00 |
| ATOM | 149 | CA   | THRM | 9 | -2.771 | 2.998  | 1.467  | 1.00 | 0.00 |
| ATOM | 150 | HA   | THRM | 9 | -2.443 | 2.870  | 0.420  | 1.00 | 0.00 |
| ATOM | 151 | CB   | THRM | 9 | -4.221 | 3.589  | 1.473  | 1.00 | 0.00 |
| ATOM | 152 | HB   | THRM | 9 | -4.340 | 4.213  | 2.385  | 1.00 | 0.00 |
| ATOM | 153 | QG2  | THRM | 9 | -4.725 | 4.672  | -0.081 | 1.00 | 0.00 |
| ATOM | 154 | OG1  | THRM | 9 | -5.183 | 2.544  | 1.510  | 1.00 | 0.00 |
| ATOM | 155 | 1HG  | THRM | 9 | -5.847 | 2.816  | 2.151  | 1.00 | 0.00 |
| ATOM | 156 | CG2  | THRM | 9 | -4.618 | 4.440  | 0.247  | 1.00 | 0.00 |
| ATOM | 157 | 1HG2 | THRM | 9 | -5.557 | 4.998  | 0.415  | 1.00 | 0.00 |
| ATOM | 158 | 2HG2 | THRM | 9 | -3.856 | 5.202  | -0.004 | 1.00 | 0.00 |
| ATOM | 159 | 3HG2 | THRM | 9 | -4.763 | 3.815  | -0.655 | 1.00 | 0.00 |



|      |     |      |      |    |        |       |        |      |      |
|------|-----|------|------|----|--------|-------|--------|------|------|
| ATOM | 160 | C    | THRM | 9  | -1.803 | 3.950 | 2.128  | 1.00 | 0.00 |
| ATOM | 161 | O    | THRM | 9  | -2.182 | 4.897 | 2.788  | 1.00 | 0.00 |
| ATOM | 162 | N    | VALM | 10 | -0.521 | 3.692 | 1.946  | 1.00 | 0.00 |
| ATOM | 163 | QB   | VALM | 10 | -0.132 | 2.213 | 0.916  | 1.00 | 0.00 |
| ATOM | 164 | CN   | VALM | 10 | -0.209 | 2.505 | 1.120  | 1.00 | 0.00 |
| ATOM | 165 | 1HNB | VALM | 10 | 0.848  | 2.515 | 0.853  | 1.00 | 0.00 |
| ATOM | 166 | 2HNB | VALM | 10 | -0.433 | 1.600 | 1.683  | 1.00 | 0.00 |
| ATOM | 167 | 3HNB | VALM | 10 | -0.812 | 2.525 | 0.211  | 1.00 | 0.00 |
| ATOM | 168 | CA   | VALM | 10 | 0.526  | 4.528 | 2.525  | 1.00 | 0.00 |
| ATOM | 169 | HA   | VALM | 10 | 0.175  | 5.576 | 2.546  | 1.00 | 0.00 |
| ATOM | 170 | CB   | VALM | 10 | 0.837  | 4.053 | 4.001  | 1.00 | 0.00 |
| ATOM | 171 | HB   | VALM | 10 | 1.719  | 3.379 | 3.948  | 1.00 | 0.00 |
| ATOM | 172 | QG1  | VALM | 10 | 1.297  | 5.474 | 5.294  | 1.00 | 0.00 |
| ATOM | 173 | QG2  | VALM | 10 | -0.623 | 3.035 | 4.825  | 1.00 | 0.00 |
| ATOM | 174 | CG1  | VALM | 10 | 1.194  | 5.167 | 5.023  | 1.00 | 0.00 |
| ATOM | 175 | 1HG1 | VALM | 10 | 0.656  | 5.049 | 5.983  | 1.00 | 0.00 |
| ATOM | 176 | 2HG1 | VALM | 10 | 2.276  | 5.193 | 5.255  | 1.00 | 0.00 |
| ATOM | 177 | 3HG1 | VALM | 10 | 0.960  | 6.180 | 4.643  | 1.00 | 0.00 |
| ATOM | 178 | CG2  | VALM | 10 | -0.312 | 3.250 | 4.656  | 1.00 | 0.00 |
| ATOM | 179 | 1HG2 | VALM | 10 | -0.137 | 3.070 | 5.734  | 1.00 | 0.00 |
| ATOM | 180 | 2HG2 | VALM | 10 | -1.282 | 3.772 | 4.566  | 1.00 | 0.00 |
| ATOM | 181 | 3HG2 | VALM | 10 | -0.449 | 2.262 | 4.176  | 1.00 | 0.00 |
| ATOM | 182 | QQG  | VALM | 10 | 0.337  | 4.254 | 5.059  | 1.00 | 0.00 |
| ATOM | 183 | C    | VALM | 10 | 1.775  | 4.497 | 1.676  | 1.00 | 0.00 |
| ATOM | 184 | O    | VALM | 10 | 2.839  | 4.022 | 2.093  | 1.00 | 0.00 |
| ATOM | 185 | N    | ILEM | 11 | 1.663  | 5.006 | 0.464  | 1.00 | 0.00 |
| ATOM | 186 | QB   | ILEM | 11 | 0.002  | 5.668 | 0.016  | 1.00 | 0.00 |
| ATOM | 187 | CN   | ILEM | 11 | 0.329  | 5.537 | 0.105  | 1.00 | 0.00 |
| ATOM | 188 | 1HNB | ILEM | 11 | -0.353 | 5.406 | 0.944  | 1.00 | 0.00 |
| ATOM | 189 | 2HNB | ILEM | 11 | 0.413  | 6.597 | -0.134 | 1.00 | 0.00 |
| ATOM | 190 | 3HNB | ILEM | 11 | -0.054 | 5.000 | -0.762 | 1.00 | 0.00 |
| ATOM | 191 | CA   | ILEM | 11 | 2.787  | 5.043 | -0.466 | 1.00 | 0.00 |
| ATOM | 192 | HA   | ILEM | 11 | 2.480  | 5.649 | -1.338 | 1.00 | 0.00 |
| ATOM | 193 | CB   | ILEM | 11 | 4.057  | 5.724 | 0.190  | 1.00 | 0.00 |
| ATOM | 194 | HB   | ILEM | 11 | 3.857  | 5.781 | 1.282  | 1.00 | 0.00 |
| ATOM | 195 | QG2  | ILEM | 11 | 5.715  | 4.666 | -0.070 | 1.00 | 0.00 |
| ATOM | 196 | CG2  | ILEM | 11 | 5.360  | 4.890 | -0.007 | 1.00 | 0.00 |
| ATOM | 197 | 1HG2 | ILEM | 11 | 5.488  | 4.549 | -1.050 | 1.00 | 0.00 |
| ATOM | 198 | 2HG2 | ILEM | 11 | 6.280  | 5.462 | 0.208  | 1.00 | 0.00 |
| ATOM | 199 | 3HG2 | ILEM | 11 | 5.378  | 3.987 | 0.633  | 1.00 | 0.00 |
| ATOM | 200 | CG1  | ILEM | 11 | 4.337  | 7.183 | -0.291 | 1.00 | 0.00 |
| ATOM | 201 | 2HG1 | ILEM | 11 | 4.685  | 7.795 | 0.562  | 1.00 | 0.00 |
| ATOM | 202 | QG1  | ILEM | 11 | 4.685  | 7.795 | 0.562  | 1.00 | 0.00 |
| ATOM | 203 | QD1  | ILEM | 11 | 5.695  | 7.379 | -1.682 | 1.00 | 0.00 |
| ATOM | 204 | CD1  | ILEM | 11 | 5.413  | 7.335 | -1.386 | 1.00 | 0.00 |
| ATOM | 205 | 1HD1 | ILEM | 11 | 4.954  | 7.445 | -2.386 | 1.00 | 0.00 |
| ATOM | 206 | 2HD1 | ILEM | 11 | 6.044  | 8.229 | -1.218 | 1.00 | 0.00 |
| ATOM | 207 | 3HD1 | ILEM | 11 | 6.086  | 6.462 | -1.442 | 1.00 | 0.00 |
| ATOM | 208 | C    | ILEM | 11 | 3.100  | 3.663 | -0.993 | 1.00 | 0.00 |
| ATOM | 209 | O    | ILEM | 11 | 2.800  | 2.637 | -0.366 | 1.00 | 0.00 |
| ATOM | 210 | N    | PIPO | 12 | 3.712  | 3.615 | -2.161 | 1.00 | 0.00 |
| ATOM | 211 | CE   | PIPO | 12 | 4.077  | 2.367 | -2.797 | 1.00 | 0.00 |
| ATOM | 212 | CA   | PIPO | 12 | 4.084  | 4.812 | -2.899 | 1.00 | 0.00 |
| ATOM | 213 | HA   | PIPO | 12 | 4.605  | 5.529 | -2.265 | 1.00 | 0.00 |
| ATOM | 214 | CB   | PIPO | 12 | 5.017  | 4.484 | -4.079 | 1.00 | 0.00 |
| ATOM | 215 | 2HB  | PIPO | 12 | 5.273  | 5.404 | -4.607 | 1.00 | 0.00 |
| ATOM | 216 | 3HB  | PIPO | 12 | 5.926  | 4.015 | -3.705 | 1.00 | 0.00 |
| ATOM | 217 | QB   | PIPO | 12 | 5.600  | 4.709 | -4.156 | 1.00 | 0.00 |
| ATOM | 218 | CG   | PIPO | 12 | 4.304  | 3.521 | -5.047 | 1.00 | 0.00 |

|               |     |      |      |    |        |        |        |      |      |
|---------------|-----|------|------|----|--------|--------|--------|------|------|
| ATOM          | 219 | 2HG  | PIPO | 12 | 4.965  | 3.288  | -5.882 | 1.00 | 0.00 |
| ATOM          | 220 | 3HG  | PIPO | 12 | 3.395  | 3.988  | -5.423 | 1.00 | 0.00 |
| ATOM          | 221 | QG   | PIPO | 12 | 4.180  | 3.638  | -5.652 | 1.00 | 0.00 |
| ATOM          | 222 | CD   | PIPO | 12 | 3.913  | 2.500  | -4.322 | 1.00 | 0.00 |
| ATOM          | 223 | 2HD  | PIPO | 12 | 4.189  | 1.561  | -4.802 | 1.00 | 0.00 |
| ATOM          | 224 | 3HD  | PIPO | 12 | 2.875  | 2.736  | -4.558 | 1.00 | 0.00 |
| ATOM          | 225 | OD   | PIPO | 12 | 3.532  | 2.149  | -4.680 | 1.00 | 0.00 |
| ATOM          | 226 | 1HE  | PIPO | 12 | 5.115  | 2.131  | -2.563 | 1.00 | 0.00 |
| ATOM          | 227 | 2HE  | PIPO | 12 | 3.432  | 1.569  | -2.430 | 1.00 | 0.00 |
| ATOM          | 228 | QE   | PIPO | 12 | 4.273  | 1.850  | -2.496 | 1.00 | 0.00 |
| ATOM          | 229 | C    | PIPO | 12 | 2.852  | 5.527  | -3.478 | 1.00 | 0.00 |
| ATOM          | 230 | O    | PIPO | 12 | 2.659  | 6.704  | -3.153 | 1.00 | 0.00 |
| ATOM          | 231 | O1'  | PHEO | 13 | 2.043  | 4.888  | -4.303 | 1.00 | 0.00 |
| ATOM          | 232 | CA   | PHEO | 13 | 0.633  | 5.244  | -4.435 | 1.00 | 0.00 |
| ATOM          | 233 | HA   | PHEO | 13 | 0.526  | 6.139  | -5.076 | 1.00 | 0.00 |
| ATOM          | 234 | CB   | PHEO | 13 | 0.050  | 5.533  | -3.018 | 1.00 | 0.00 |
| ATOM          | 235 | 2HB  | PHEO | 13 | 0.882  | 5.689  | -2.303 | 1.00 | 0.00 |
| ATOM          | 236 | QB   | PHEO | 13 | 0.882  | 5.689  | -2.303 | 1.00 | 0.00 |
| ATOM          | 237 | QD   | PHEO | 13 | -1.008 | 6.864  | -2.871 | 1.00 | 0.00 |
| ATOM          | 238 | QE   | PHEO | 13 | -2.479 | 8.819  | -2.604 | 1.00 | 0.00 |
| ATOM          | 239 | QR   | PHEO | 13 | -2.038 | 8.234  | -2.684 | 1.00 | 0.00 |
| ATOM          | 240 | CG   | PHEO | 13 | -0.915 | 6.722  | -2.905 | 1.00 | 0.00 |
| ATOM          | 241 | CD1  | PHEO | 13 | -0.570 | 7.951  | -3.480 | 1.00 | 0.00 |
| ATOM          | 242 | 1HD  | PHEO | 13 | 0.365  | 8.057  | -4.015 | 1.00 | 0.00 |
| ATOM          | 243 | CE1  | PHEO | 13 | -1.395 | 9.058  | -3.318 | 1.00 | 0.00 |
| ATOM          | 244 | 1HE  | PHEO | 13 | -1.104 | 10.010 | -3.739 | 1.00 | 0.00 |
| ATOM          | 245 | CZ   | PHEO | 13 | -2.581 | 8.941  | -2.597 | 1.00 | 0.00 |
| ATOM          | 246 | HZ   | PHEO | 13 | -3.218 | 9.803  | -2.469 | 1.00 | 0.00 |
| ATOM          | 247 | CE2  | PHEO | 13 | -2.939 | 7.717  | -2.034 | 1.00 | 0.00 |
| ATOM          | 248 | 2HE  | PHEO | 13 | -3.855 | 7.628  | -1.469 | 1.00 | 0.00 |
| ATOM          | 249 | CD2  | PHEO | 13 | -2.107 | 6.611  | -2.185 | 1.00 | 0.00 |
| ATOM          | 250 | 2HD  | PHEO | 13 | -2.380 | 5.670  | -1.727 | 1.00 | 0.00 |
| ATOM          | 251 | C    | PHEO | 13 | -0.157 | 4.110  | -5.044 | 1.00 | 0.00 |
| ATOM          | 252 | O    | PHEO | 13 | -0.226 | 3.937  | -6.293 | 1.00 | 0.00 |
| <u>TER</u>    |     |      |      |    |        |        |        |      |      |
| <u>ENDMDL</u> |     |      |      |    |        |        |        |      |      |
| <u>MODEL</u>  |     |      |      |    |        |        |        |      |      |
|               | 9   |      |      |    |        |        |        |      |      |
| ATOM          | 1   | N    | VALM | 1  | -0.644 | 3.425  | -4.474 | 1.00 | 0.00 |
| ATOM          | 2   | QB   | VALM | 1  | -2.356 | 4.109  | -4.444 | 1.00 | 0.00 |
| ATOM          | 3   | CN   | VALM | 1  | -2.018 | 3.974  | -4.450 | 1.00 | 0.00 |
| ATOM          | 4   | 1HNB | VALM | 1  | -2.035 | 4.935  | -4.962 | 1.00 | 0.00 |
| ATOM          | 5   | 2HNB | VALM | 1  | -2.695 | 3.283  | -4.952 | 1.00 | 0.00 |
| ATOM          | 6   | 3HNB | VALM | 1  | -2.339 | 4.108  | -3.417 | 1.00 | 0.00 |
| ATOM          | 7   | CA   | VALM | 1  | -0.381 | 1.993  | -4.358 | 1.00 | 0.00 |
| ATOM          | 8   | HA   | VALM | 1  | -1.328 | 1.475  | -4.122 | 1.00 | 0.00 |
| ATOM          | 9   | CB   | VALM | 1  | 0.191  | 1.441  | -5.723 | 1.00 | 0.00 |
| ATOM          | 10  | HB   | VALM | 1  | 0.991  | 2.139  | -6.049 | 1.00 | 0.00 |
| ATOM          | 11  | QG1  | VALM | 1  | 0.995  | -0.362 | -5.664 | 1.00 | 0.00 |
| ATOM          | 12  | QG2  | VALM | 1  | -1.139 | 1.367  | -7.164 | 1.00 | 0.00 |
| ATOM          | 13  | CG1  | VALM | 1  | 0.829  | 0.026  | -5.681 | 1.00 | 0.00 |
| ATOM          | 14  | 1HG1 | VALM | 1  | 1.784  | -0.025 | -6.239 | 1.00 | 0.00 |
| ATOM          | 15  | 2HG1 | VALM | 1  | 1.036  | -0.311 | -4.648 | 1.00 | 0.00 |
| ATOM          | 16  | 3HG1 | VALM | 1  | 0.165  | -0.751 | -6.105 | 1.00 | 0.00 |
| ATOM          | 17  | CG2  | VALM | 1  | -0.854 | 1.384  | -6.864 | 1.00 | 0.00 |
| ATOM          | 18  | 1HG2 | VALM | 1  | -0.412 | 1.614  | -7.850 | 1.00 | 0.00 |
| ATOM          | 19  | 2HG2 | VALM | 1  | -1.324 | 0.386  | -6.941 | 1.00 | 0.00 |
| ATOM          | 20  | 3HG2 | VALM | 1  | -1.682 | 2.100  | -6.700 | 1.00 | 0.00 |
| ATOM          | 21  | QQG  | VALM | 1  | -0.072 | 0.502  | -6.414 | 1.00 | 0.00 |
| ATOM          | 22  | C    | VALM | 1  | 0.573  | 1.708  | -3.222 | 1.00 | 0.00 |

|      |    |      |      |   |        |        |        |      |      |
|------|----|------|------|---|--------|--------|--------|------|------|
| ATOM | 23 | O    | VALM | 1 | 1.558  | 2.428  | -3.064 | 1.00 | 0.00 |
| ATOM | 24 | N    | PRO  | 2 | 0.260  | 0.645  | -2.434 | 1.00 | 0.00 |
| ATOM | 25 | CD   | PRO  | 2 | -0.899 | -0.228 | -2.592 | 1.00 | 0.00 |
| ATOM | 26 | CA   | PRO  | 2 | 1.102  | 0.274  | -1.310 | 1.00 | 0.00 |
| ATOM | 27 | HA   | PRO  | 2 | 1.399  | 1.090  | -0.813 | 1.00 | 0.00 |
| ATOM | 28 | CB   | PRO  | 2 | 0.232  | -0.625 | -0.446 | 1.00 | 0.00 |
| ATOM | 29 | 2HB  | PRO  | 2 | -0.155 | -0.083 | 0.416  | 1.00 | 0.00 |
| ATOM | 30 | QB   | PRO  | 2 | -0.155 | -0.083 | 0.416  | 1.00 | 0.00 |
| ATOM | 31 | CG   | PRO  | 2 | -0.898 | -1.099 | -1.346 | 1.00 | 0.00 |
| ATOM | 32 | 2HG  | PRO  | 2 | -1.854 | -1.025 | -0.827 | 1.00 | 0.00 |
| ATOM | 33 | QG   | PRO  | 2 | -1.854 | -1.025 | -0.827 | 1.00 | 0.00 |
| ATOM | 34 | 2HD  | PRO  | 2 | -1.821 | 0.348  | -2.671 | 1.00 | 0.00 |
| ATOM | 35 | QD   | PRO  | 2 | -1.821 | 0.348  | -2.671 | 1.00 | 0.00 |
| ATOM | 36 | C    | PRO  | 2 | 2.383  | -0.413 | -1.787 | 1.00 | 0.00 |
| ATOM | 37 | O    | PRO  | 2 | 2.434  | -0.934 | -2.901 | 1.00 | 0.00 |
| ATOM | 38 | N    | ILE  | 3 | 3.386  | -0.391 | -0.922 | 1.00 | 0.00 |
| ATOM | 39 | H    | ILE  | 3 | 3.337  | 0.035  | -0.019 | 1.00 | 0.00 |
| ATOM | 40 | CA   | ILE  | 3 | 4.664  | -1.005 | -1.243 | 1.00 | 0.00 |
| ATOM | 41 | HA   | ILE  | 3 | 4.667  | -1.214 | -2.312 | 1.00 | 0.00 |
| ATOM | 42 | CB   | ILE  | 3 | 5.811  | -0.030 | -0.968 | 1.00 | 0.00 |
| ATOM | 43 | HB   | ILE  | 3 | 6.513  | -0.511 | -0.287 | 1.00 | 0.00 |
| ATOM | 44 | QG2  | ILE  | 3 | 6.760  | 0.366  | -2.559 | 1.00 | 0.00 |
| ATOM | 45 | CG2  | ILE  | 3 | 6.577  | 0.290  | -2.253 | 1.00 | 0.00 |
| ATOM | 46 | 1HG2 | ILE  | 3 | 7.030  | 1.278  | -2.170 | 1.00 | 0.00 |
| ATOM | 47 | 2HG2 | ILE  | 3 | 7.358  | -0.456 | -2.407 | 1.00 | 0.00 |
| ATOM | 48 | 3HG2 | ILE  | 3 | 5.890  | 0.275  | -3.100 | 1.00 | 0.00 |
| ATOM | 49 | CG1  | ILE  | 3 | 5.302  | 1.235  | -0.274 | 1.00 | 0.00 |
| ATOM | 50 | 2HG1 | ILE  | 3 | 4.342  | 1.527  | -0.703 | 1.00 | 0.00 |
| ATOM | 51 | QG1  | ILE  | 3 | 4.342  | 1.527  | -0.703 | 1.00 | 0.00 |
| ATOM | 52 | QD1  | ILE  | 3 | 5.110  | 0.957  | 1.588  | 1.00 | 0.00 |
| ATOM | 53 | CD1  | ILE  | 3 | 5.147  | 1.010  | 1.230  | 1.00 | 0.00 |
| ATOM | 54 | 1HD1 | ILE  | 3 | 5.598  | 0.056  | 1.504  | 1.00 | 0.00 |
| ATOM | 55 | 2HD1 | ILE  | 3 | 5.644  | 1.815  | 1.771  | 1.00 | 0.00 |
| ATOM | 56 | 3HD1 | ILE  | 3 | 4.088  | 0.998  | 1.490  | 1.00 | 0.00 |
| ATOM | 57 | C    | ILE  | 3 | 4.791  | -2.331 | -0.490 | 1.00 | 0.00 |
| ATOM | 58 | O    | ILE  | 3 | 5.280  | -3.352 | -0.996 | 1.00 | 0.00 |
| ATOM | 59 | N    | PIP  | 4 | 4.338  | -2.314 | 0.751  | 1.00 | 0.00 |
| ATOM | 60 | CE   | PIP  | 4 | 3.765  | -1.130 | 1.353  | 1.00 | 0.00 |
| ATOM | 61 | CA   | PIP  | 4 | 4.394  | -3.480 | 1.619  | 1.00 | 0.00 |
| ATOM | 62 | HA   | PIP  | 4 | 5.384  | -3.935 | 1.619  | 1.00 | 0.00 |
| ATOM | 63 | CB   | PIP  | 4 | 4.060  | -3.116 | 3.078  | 1.00 | 0.00 |
| ATOM | 64 | 2HB  | PIP  | 4 | 4.111  | -4.012 | 3.697  | 1.00 | 0.00 |
| ATOM | 65 | 3HB  | PIP  | 4 | 4.777  | -2.381 | 3.443  | 1.00 | 0.00 |
| ATOM | 66 | QB   | PIP  | 4 | 4.444  | -3.197 | 3.570  | 1.00 | 0.00 |
| ATOM | 67 | CG   | PIP  | 4 | 2.639  | -2.526 | 3.148  | 1.00 | 0.00 |
| ATOM | 68 | 2HG  | PIP  | 4 | 2.403  | -2.269 | 4.181  | 1.00 | 0.00 |
| ATOM | 69 | 3HG  | PIP  | 4 | 1.921  | -3.261 | 2.784  | 1.00 | 0.00 |
| ATOM | 70 | QG   | PIP  | 4 | 2.162  | -2.765 | 3.483  | 1.00 | 0.00 |
| ATOM | 71 | CD   | PIP  | 4 | 2.613  | -1.536 | 2.289  | 1.00 | 0.00 |
| ATOM | 72 | 2HD  | PIP  | 4 | 2.180  | -0.644 | 2.744  | 1.00 | 0.00 |
| ATOM | 73 | 3HD  | PIP  | 4 | 1.846  | -2.059 | 1.718  | 1.00 | 0.00 |
| ATOM | 74 | QD   | PIP  | 4 | 2.013  | -1.352 | 2.231  | 1.00 | 0.00 |
| ATOM | 75 | 1HE  | PIP  | 4 | 4.530  | -0.606 | 1.926  | 1.00 | 0.00 |
| ATOM | 76 | 2HE  | PIP  | 4 | 3.383  | -0.472 | 0.571  | 1.00 | 0.00 |
| ATOM | 77 | QE   | PIP  | 4 | 3.956  | -0.539 | 1.248  | 1.00 | 0.00 |
| ATOM | 78 | C    | PIP  | 4 | 3.394  | -4.562 | 1.179  | 1.00 | 0.00 |
| ATOM | 79 | O    | PIP  | 4 | 2.721  | -4.289 | 0.187  | 1.00 | 0.00 |
| ATOM | 80 | N    | ALA  | 5 | 3.308  | -5.700 | 1.854  | 1.00 | 0.00 |
| ATOM | 81 | H    | ALA  | 5 | 3.859  | -5.914 | 2.660  | 1.00 | 0.00 |

|      |     |      |      |   |        |        |        |      |      |
|------|-----|------|------|---|--------|--------|--------|------|------|
| ATOM | 82  | CA   | ALA  | 5 | 2.378  | -6.740 | 1.451  | 1.00 | 0.00 |
| ATOM | 83  | HA   | ALA  | 5 | 2.792  | -7.232 | 0.570  | 1.00 | 0.00 |
| ATOM | 84  | QB   | ALA  | 5 | 2.216  | -8.015 | 2.841  | 1.00 | 0.00 |
| ATOM | 85  | CB   | ALA  | 5 | 2.247  | -7.770 | 2.574  | 1.00 | 0.00 |
| ATOM | 86  | 1HB  | ALA  | 5 | 3.001  | -8.547 | 2.445  | 1.00 | 0.00 |
| ATOM | 87  | 2HB  | ALA  | 5 | 2.392  | -7.280 | 3.536  | 1.00 | 0.00 |
| ATOM | 88  | 3HB  | ALA  | 5 | 1.254  | -8.219 | 2.542  | 1.00 | 0.00 |
| ATOM | 89  | C    | ALA  | 5 | 1.037  | -6.105 | 1.082  | 1.00 | 0.00 |
| ATOM | 90  | O    | ALA  | 5 | 0.696  | -5.033 | 1.580  | 1.00 | 0.00 |
| ATOM | 91  | N    | PRO  | 6 | 0.291  | -6.811 | 0.191  | 1.00 | 0.00 |
| ATOM | 92  | CD   | PRO  | 6 | 0.662  | -8.085 | -0.419 | 1.00 | 0.00 |
| ATOM | 93  | CA   | PRO  | 6 | -1.006 | -6.328 | -0.250 | 1.00 | 0.00 |
| ATOM | 94  | HA   | PRO  | 6 | -0.970 | -5.343 | -0.423 | 1.00 | 0.00 |
| ATOM | 95  | CB   | PRO  | 6 | -1.309 | -7.110 | -1.517 | 1.00 | 0.00 |
| ATOM | 96  | 2HB  | PRO  | 6 | -1.122 | -6.506 | -2.403 | 1.00 | 0.00 |
| ATOM | 97  | QB   | PRO  | 6 | -1.122 | -6.506 | -2.403 | 1.00 | 0.00 |
| ATOM | 98  | CG   | PRO  | 6 | -0.396 | -8.326 | -1.484 | 1.00 | 0.00 |
| ATOM | 99  | 2HG  | PRO  | 6 | 0.070  | -8.479 | -2.457 | 1.00 | 0.00 |
| ATOM | 100 | QG   | PRO  | 6 | 0.070  | -8.479 | -2.457 | 1.00 | 0.00 |
| ATOM | 101 | 2HD  | PRO  | 6 | 1.659  | -8.039 | -0.855 | 1.00 | 0.00 |
| ATOM | 102 | QD   | PRO  | 6 | 1.659  | -8.039 | -0.855 | 1.00 | 0.00 |
| ATOM | 103 | C    | PRO  | 6 | -2.063 | -6.521 | 0.841  | 1.00 | 0.00 |
| ATOM | 104 | O    | PRO  | 6 | -2.354 | -7.630 | 1.307  | 1.00 | 0.00 |
| ATOM | 105 | N    | THRM | 7 | -2.649 | -5.412 | 1.253  | 1.00 | 0.00 |
| ATOM | 106 | QB   | THRM | 7 | -3.927 | -5.615 | 2.566  | 1.00 | 0.00 |
| ATOM | 107 | CN   | THRM | 7 | -3.675 | -5.575 | 2.307  | 1.00 | 0.00 |
| ATOM | 108 | 1HNB | THRM | 7 | -3.767 | -6.630 | 2.565  | 1.00 | 0.00 |
| ATOM | 109 | 2HNB | THRM | 7 | -3.381 | -5.009 | 3.191  | 1.00 | 0.00 |
| ATOM | 110 | 3HNB | THRM | 7 | -4.633 | -5.205 | 1.942  | 1.00 | 0.00 |
| ATOM | 111 | CA   | THRM | 7 | -2.305 | -4.105 | 0.702  | 1.00 | 0.00 |
| ATOM | 112 | HA   | THRM | 7 | -1.210 | -4.061 | 0.566  | 1.00 | 0.00 |
| ATOM | 113 | CB   | THRM | 7 | -2.993 | -3.897 | -0.689 | 1.00 | 0.00 |
| ATOM | 114 | HB   | THRM | 7 | -3.489 | -2.902 | -0.688 | 1.00 | 0.00 |
| ATOM | 115 | QG2  | THRM | 7 | -1.824 | -3.997 | -2.260 | 1.00 | 0.00 |
| ATOM | 116 | OG1  | THRM | 7 | -3.980 | -4.895 | -0.912 | 1.00 | 0.00 |
| ATOM | 117 | 1HG  | THRM | 7 | -4.809 | -4.529 | -0.590 | 1.00 | 0.00 |
| ATOM | 118 | CG2  | THRM | 7 | -2.073 | -3.979 | -1.927 | 1.00 | 0.00 |
| ATOM | 119 | 1HG2 | THRM | 7 | -2.198 | -3.109 | -2.597 | 1.00 | 0.00 |
| ATOM | 120 | 2HG2 | THRM | 7 | -1.001 | -3.997 | -1.656 | 1.00 | 0.00 |
| ATOM | 121 | 3HG2 | THRM | 7 | -2.273 | -4.887 | -2.527 | 1.00 | 0.00 |
| ATOM | 122 | C    | THRM | 7 | -2.686 | -2.999 | 1.656  | 1.00 | 0.00 |
| ATOM | 123 | O    | THRM | 7 | -3.533 | -3.211 | 2.524  | 1.00 | 0.00 |
| ATOM | 124 | N    | VAL  | 8 | -2.061 | -1.844 | 1.485  | 1.00 | 0.00 |
| ATOM | 125 | H    | VAL  | 8 | -1.374 | -1.679 | 0.779  | 1.00 | 0.00 |
| ATOM | 126 | CA   | VAL  | 8 | -2.344 | -0.705 | 2.343  | 1.00 | 0.00 |
| ATOM | 127 | HA   | VAL  | 8 | -3.350 | -0.837 | 2.743  | 1.00 | 0.00 |
| ATOM | 128 | CB   | VAL  | 8 | -1.366 | -0.681 | 3.520  | 1.00 | 0.00 |
| ATOM | 129 | HB   | VAL  | 8 | -1.145 | 0.361  | 3.751  | 1.00 | 0.00 |
| ATOM | 130 | QG1  | VAL  | 8 | -2.138 | -1.466 | 5.061  | 1.00 | 0.00 |
| ATOM | 131 | QG2  | VAL  | 8 | 0.262  | -1.534 | 3.067  | 1.00 | 0.00 |
| ATOM | 132 | CG1  | VAL  | 8 | -1.990 | -1.316 | 4.765  | 1.00 | 0.00 |
| ATOM | 133 | 1HG1 | VAL  | 8 | -2.326 | -0.531 | 5.443  | 1.00 | 0.00 |
| ATOM | 134 | 2HG1 | VAL  | 8 | -2.841 | -1.931 | 4.472  | 1.00 | 0.00 |
| ATOM | 135 | 3HG1 | VAL  | 8 | -1.248 | -1.937 | 5.267  | 1.00 | 0.00 |
| ATOM | 136 | CG2  | VAL  | 8 | -0.050 | -1.371 | 3.154  | 1.00 | 0.00 |
| ATOM | 137 | 1HG2 | VAL  | 8 | 0.309  | -0.984 | 2.201  | 1.00 | 0.00 |
| ATOM | 138 | 2HG2 | VAL  | 8 | 0.690  | -1.174 | 3.929  | 1.00 | 0.00 |
| ATOM | 139 | 3HG2 | VAL  | 8 | -0.214 | -2.445 | 3.072  | 1.00 | 0.00 |
| ATOM | 140 | QQG  | VAL  | 8 | -0.938 | -1.500 | 4.064  | 1.00 | 0.00 |

|      |     |      |      |    |        |       |        |      |      |
|------|-----|------|------|----|--------|-------|--------|------|------|
| ATOM | 141 | C    | VAL  | 8  | -2.309 | 0.577 | 1.510  | 1.00 | 0.00 |
| ATOM | 142 | O    | VAL  | 8  | -1.916 | 0.609 | 0.338  | 1.00 | 0.00 |
| ATOM | 143 | N    | THRM | 9  | -2.731 | 1.660 | 2.135  | 1.00 | 0.00 |
| ATOM | 144 | QB   | THRM | 9  | -3.279 | 1.425 | 3.880  | 1.00 | 0.00 |
| ATOM | 145 | CN   | THRM | 9  | -3.171 | 1.471 | 3.536  | 1.00 | 0.00 |
| ATOM | 146 | 1HNB | THRM | 9  | -3.063 | 0.423 | 3.813  | 1.00 | 0.00 |
| ATOM | 147 | 2HNB | THRM | 9  | -2.559 | 2.087 | 4.196  | 1.00 | 0.00 |
| ATOM | 148 | 3HNB | THRM | 9  | -4.217 | 1.765 | 3.632  | 1.00 | 0.00 |
| ATOM | 149 | CA   | THRM | 9  | -2.763 | 2.967 | 1.484  | 1.00 | 0.00 |
| ATOM | 150 | HA   | THRM | 9  | -2.447 | 2.840 | 0.433  | 1.00 | 0.00 |
| ATOM | 151 | CB   | THRM | 9  | -4.213 | 3.557 | 1.507  | 1.00 | 0.00 |
| ATOM | 152 | HB   | THRM | 9  | -4.377 | 4.043 | 2.492  | 1.00 | 0.00 |
| ATOM | 153 | QG2  | THRM | 9  | -4.648 | 4.852 | 0.100  | 1.00 | 0.00 |
| ATOM | 154 | OG1  | THRM | 9  | -5.175 | 2.522 | 1.344  | 1.00 | 0.00 |
| ATOM | 155 | 1HG  | THRM | 9  | -4.782 | 1.731 | 1.724  | 1.00 | 0.00 |
| ATOM | 156 | CG2  | THRM | 9  | -4.553 | 4.578 | 0.400  | 1.00 | 0.00 |
| ATOM | 157 | 1HG2 | THRM | 9  | -4.876 | 4.086 | -0.536 | 1.00 | 0.00 |
| ATOM | 158 | 2HG2 | THRM | 9  | -5.383 | 5.252 | 0.686  | 1.00 | 0.00 |
| ATOM | 159 | 3HG2 | THRM | 9  | -3.686 | 5.219 | 0.151  | 1.00 | 0.00 |
| ATOM | 160 | C    | THRM | 9  | -1.789 | 3.919 | 2.136  | 1.00 | 0.00 |
| ATOM | 161 | O    | THRM | 9  | -2.160 | 4.877 | 2.784  | 1.00 | 0.00 |
| ATOM | 162 | N    | VALM | 10 | -0.509 | 3.650 | 1.957  | 1.00 | 0.00 |
| ATOM | 163 | QB   | VALM | 10 | -0.131 | 2.155 | 0.945  | 1.00 | 0.00 |
| ATOM | 164 | CN   | VALM | 10 | -0.206 | 2.451 | 1.145  | 1.00 | 0.00 |
| ATOM | 165 | 1HNB | VALM | 10 | -0.804 | 2.467 | 0.233  | 1.00 | 0.00 |
| ATOM | 166 | 2HNB | VALM | 10 | 0.853  | 2.445 | 0.884  | 1.00 | 0.00 |
| ATOM | 167 | 3HNB | VALM | 10 | -0.444 | 1.554 | 1.717  | 1.00 | 0.00 |
| ATOM | 168 | CA   | VALM | 10 | 0.544  | 4.483 | 2.528  | 1.00 | 0.00 |
| ATOM | 169 | HA   | VALM | 10 | 0.189  | 5.530 | 2.565  | 1.00 | 0.00 |
| ATOM | 170 | CB   | VALM | 10 | 0.883  | 3.993 | 3.992  | 1.00 | 0.00 |
| ATOM | 171 | HB   | VALM | 10 | 1.784  | 3.347 | 3.921  | 1.00 | 0.00 |
| ATOM | 172 | QG1  | VALM | 10 | 1.306  | 5.394 | 5.320  | 1.00 | 0.00 |
| ATOM | 173 | QG2  | VALM | 10 | -0.530 | 2.914 | 4.820  | 1.00 | 0.00 |
| ATOM | 174 | CG1  | VALM | 10 | 1.215  | 5.101 | 5.030  | 1.00 | 0.00 |
| ATOM | 175 | 1HG1 | VALM | 10 | 1.349  | 6.094 | 4.561  | 1.00 | 0.00 |
| ATOM | 176 | 2HG1 | VALM | 10 | 0.428  | 5.206 | 5.800  | 1.00 | 0.00 |
| ATOM | 177 | 3HG1 | VALM | 10 | 2.140  | 4.883 | 5.598  | 1.00 | 0.00 |
| ATOM | 178 | CG2  | VALM | 10 | -0.236 | 3.147 | 4.644  | 1.00 | 0.00 |
| ATOM | 179 | 1HG2 | VALM | 10 | -1.229 | 3.625 | 4.558  | 1.00 | 0.00 |
| ATOM | 180 | 2HG2 | VALM | 10 | -0.315 | 2.145 | 4.183  | 1.00 | 0.00 |
| ATOM | 181 | 3HG2 | VALM | 10 | -0.046 | 2.973 | 5.720  | 1.00 | 0.00 |
| ATOM | 182 | QQG  | VALM | 10 | 0.388  | 4.154 | 5.070  | 1.00 | 0.00 |
| ATOM | 183 | C    | VALM | 10 | 1.778  | 4.468 | 1.658  | 1.00 | 0.00 |
| ATOM | 184 | O    | VALM | 10 | 2.849  | 3.985 | 2.046  | 1.00 | 0.00 |
| ATOM | 185 | N    | ILEM | 11 | 1.647  | 5.000 | 0.457  | 1.00 | 0.00 |
| ATOM | 186 | QB   | ILEM | 11 | -0.022 | 5.672 | 0.050  | 1.00 | 0.00 |
| ATOM | 187 | CN   | ILEM | 11 | 0.308  | 5.539 | 0.130  | 1.00 | 0.00 |
| ATOM | 188 | 1HNB | ILEM | 11 | -0.361 | 5.393 | 0.978  | 1.00 | 0.00 |
| ATOM | 189 | 2HNB | ILEM | 11 | 0.388  | 6.604 | -0.089 | 1.00 | 0.00 |
| ATOM | 190 | 3HNB | ILEM | 11 | -0.092 | 5.019 | -0.740 | 1.00 | 0.00 |
| ATOM | 191 | CA   | ILEM | 11 | 2.755  | 5.055 | -0.491 | 1.00 | 0.00 |
| ATOM | 192 | HA   | ILEM | 11 | 2.422  | 5.652 | -1.360 | 1.00 | 0.00 |
| ATOM | 193 | CB   | ILEM | 11 | 4.021  | 5.761 | 0.143  | 1.00 | 0.00 |
| ATOM | 194 | HB   | ILEM | 11 | 3.804  | 5.893 | 1.223  | 1.00 | 0.00 |
| ATOM | 195 | QG2  | ILEM | 11 | 5.664  | 4.659 | -0.012 | 1.00 | 0.00 |
| ATOM | 196 | CG2  | ILEM | 11 | 5.317  | 4.900 | 0.024  | 1.00 | 0.00 |
| ATOM | 197 | 1HG2 | ILEM | 11 | 5.110  | 3.818 | 0.086  | 1.00 | 0.00 |
| ATOM | 198 | 2HG2 | ILEM | 11 | 5.835  | 5.024 | -0.943 | 1.00 | 0.00 |
| ATOM | 199 | 3HG2 | ILEM | 11 | 6.048  | 5.136 | 0.821  | 1.00 | 0.00 |

Supplementary Material for Organic & Biomolecular Chemistry  
 This journal is © The Royal Society of Chemistry 2006

|        |     |      |      |    |        |        |        |      |      |
|--------|-----|------|------|----|--------|--------|--------|------|------|
| ATOM   | 200 | CG1  | ILEM | 11 | 4.329  | 7.183  | -0.430 | 1.00 | 0.00 |
| ATOM   | 201 | 2HG1 | ILEM | 11 | 4.117  | 7.198  | -1.516 | 1.00 | 0.00 |
| ATOM   | 202 | QG1  | ILEM | 11 | 4.117  | 7.198  | -1.516 | 1.00 | 0.00 |
| ATOM   | 203 | QD1  | ILEM | 11 | 3.297  | 8.657  | 0.330  | 1.00 | 0.00 |
| ATOM   | 204 | CD1  | ILEM | 11 | 3.513  | 8.343  | 0.176  | 1.00 | 0.00 |
| ATOM   | 205 | 1HD1 | ILEM | 11 | 3.694  | 9.286  | -0.372 | 1.00 | 0.00 |
| ATOM   | 206 | 2HD1 | ILEM | 11 | 2.425  | 8.146  | 0.133  | 1.00 | 0.00 |
| ATOM   | 207 | 3HD1 | ILEM | 11 | 3.774  | 8.538  | 1.231  | 1.00 | 0.00 |
| ATOM   | 208 | C    | ILEM | 11 | 3.085  | 3.679  | -1.018 | 1.00 | 0.00 |
| ATOM   | 209 | O    | ILEM | 11 | 2.772  | 2.648  | -0.403 | 1.00 | 0.00 |
| ATOM   | 210 | N    | PIPO | 12 | 3.725  | 3.638  | -2.171 | 1.00 | 0.00 |
| ATOM   | 211 | CE   | PIPO | 12 | 4.111  | 2.396  | -2.804 | 1.00 | 0.00 |
| ATOM   | 212 | CA   | PIPO | 12 | 4.112  | 4.841  | -2.893 | 1.00 | 0.00 |
| ATOM   | 213 | HA   | PIPO | 12 | 4.615  | 5.556  | -2.242 | 1.00 | 0.00 |
| ATOM   | 214 | CB   | PIPO | 12 | 5.076  | 4.523  | -4.051 | 1.00 | 0.00 |
| ATOM   | 215 | 2HB  | PIPO | 12 | 5.342  | 5.445  | -4.567 | 1.00 | 0.00 |
| ATOM   | 216 | 3HB  | PIPO | 12 | 5.977  | 4.054  | -3.656 | 1.00 | 0.00 |
| ATOM   | 217 | QB   | PIPO | 12 | 5.659  | 4.750  | -4.111 | 1.00 | 0.00 |
| ATOM   | 218 | CG   | PIPO | 12 | 4.391  | 3.562  | -5.040 | 1.00 | 0.00 |
| ATOM   | 219 | 2HG  | PIPO | 12 | 5.073  | 3.337  | -5.860 | 1.00 | 0.00 |
| ATOM   | 220 | 3HG  | PIPO | 12 | 3.490  | 4.030  | -5.436 | 1.00 | 0.00 |
| ATOM   | 221 | QG   | PIPO | 12 | 4.281  | 3.684  | -5.648 | 1.00 | 0.00 |
| ATOM   | 222 | CD   | PIPO | 12 | 3.984  | 2.537  | -4.332 | 1.00 | 0.00 |
| ATOM   | 223 | 2HD  | PIPO | 12 | 4.275  | 1.600  | -4.810 | 1.00 | 0.00 |
| ATOM   | 224 | 3HD  | PIPO | 12 | 2.952  | 2.771  | -4.592 | 1.00 | 0.00 |
| ATOM   | 225 | QD   | PIPO | 12 | 3.614  | 2.186  | -4.701 | 1.00 | 0.00 |
| ATOM   | 226 | 1HE  | PIPO | 12 | 5.143  | 2.161  | -2.545 | 1.00 | 0.00 |
| ATOM   | 227 | 2HE  | PIPO | 12 | 3.458  | 1.594  | -2.458 | 1.00 | 0.00 |
| ATOM   | 228 | QE   | PIPO | 12 | 4.300  | 1.877  | -2.502 | 1.00 | 0.00 |
| ATOM   | 229 | C    | PIPO | 12 | 2.892  | 5.555  | -3.499 | 1.00 | 0.00 |
| ATOM   | 230 | O    | PIPO | 12 | 2.712  | 6.743  | -3.205 | 1.00 | 0.00 |
| ATOM   | 231 | O1'  | PHEO | 13 | 2.081  | 4.905  | -4.312 | 1.00 | 0.00 |
| ATOM   | 232 | CA   | PHEO | 13 | 0.670  | 5.255  | -4.439 | 1.00 | 0.00 |
| ATOM   | 233 | HA   | PHEO | 13 | 0.557  | 6.150  | -5.078 | 1.00 | 0.00 |
| ATOM   | 234 | CB   | PHEO | 13 | 0.090  | 5.537  | -3.020 | 1.00 | 0.00 |
| ATOM   | 235 | 2HB  | PHEO | 13 | 0.922  | 5.687  | -2.305 | 1.00 | 0.00 |
| ATOM   | 236 | QB   | PHEO | 13 | 0.922  | 5.687  | -2.305 | 1.00 | 0.00 |
| ATOM   | 237 | QD   | PHEO | 13 | -0.965 | 6.870  | -2.863 | 1.00 | 0.00 |
| ATOM   | 238 | QE   | PHEO | 13 | -2.435 | 8.824  | -2.577 | 1.00 | 0.00 |
| ATOM   | 239 | QR   | PHEO | 13 | -1.994 | 8.239  | -2.663 | 1.00 | 0.00 |
| ATOM   | 240 | CG   | PHEO | 13 | -0.873 | 6.729  | -2.899 | 1.00 | 0.00 |
| ATOM   | 241 | CD1  | PHEO | 13 | -0.496 | 7.976  | -3.408 | 1.00 | 0.00 |
| ATOM   | 242 | 1HD  | PHEO | 13 | 0.461  | 8.097  | -3.899 | 1.00 | 0.00 |
| ATOM   | 243 | CE1  | PHEO | 13 | -1.319 | 9.083  | -3.236 | 1.00 | 0.00 |
| ATOM   | 244 | 1HE  | PHEO | 13 | -1.005 | 10.049 | -3.605 | 1.00 | 0.00 |
| ATOM   | 245 | CZ   | PHEO | 13 | -2.536 | 8.947  | -2.570 | 1.00 | 0.00 |
| ATOM   | 246 | HZ   | PHEO | 13 | -3.171 | 9.808  | -2.433 | 1.00 | 0.00 |
| ATOM   | 247 | CE2  | PHEO | 13 | -2.924 | 7.704  | -2.072 | 1.00 | 0.00 |
| ATOM   | 248 | 2HE  | PHEO | 13 | -3.864 | 7.600  | -1.549 | 1.00 | 0.00 |
| ATOM   | 249 | CD2  | PHEO | 13 | -2.095 | 6.597  | -2.234 | 1.00 | 0.00 |
| ATOM   | 250 | 2HD  | PHEO | 13 | -2.392 | 5.642  | -1.827 | 1.00 | 0.00 |
| ATOM   | 251 | C    | PHEO | 13 | -0.116 | 4.119  | -5.049 | 1.00 | 0.00 |
| ATOM   | 252 | O    | PHEO | 13 | -0.207 | 3.964  | -6.299 | 1.00 | 0.00 |
| TER    |     |      |      |    |        |        |        |      |      |
| ENDMDL |     |      |      |    |        |        |        |      |      |
| MODEL  | 10  |      |      |    |        |        |        |      |      |
| ATOM   | 1   | N    | VALM | 1  | 0.080  | 3.259  | -5.020 | 1.00 | 0.00 |
| ATOM   | 2   | QB   | VALM | 1  | 1.142  | 3.247  | -6.527 | 1.00 | 0.00 |
| ATOM   | 3   | CN   | VALM | 1  | 0.933  | 3.248  | -6.230 | 1.00 | 0.00 |

|      |    |      |      |   |        |        |        |      |      |
|------|----|------|------|---|--------|--------|--------|------|------|
| ATOM | 4  | 1HNB | VALM | 1 | 1.973  | 3.398  | -5.942 | 1.00 | 0.00 |
| ATOM | 5  | 2HNB | VALM | 1 | 0.831  | 2.291  | -6.739 | 1.00 | 0.00 |
| ATOM | 6  | 3HNB | VALM | 1 | 0.622  | 4.051  | -6.900 | 1.00 | 0.00 |
| ATOM | 7  | CA   | VALM | 1 | -0.307 | 2.028  | -4.336 | 1.00 | 0.00 |
| ATOM | 8  | HA   | VALM | 1 | -1.311 | 2.167  | -3.894 | 1.00 | 0.00 |
| ATOM | 9  | CB   | VALM | 1 | -0.350 | 0.831  | -5.367 | 1.00 | 0.00 |
| ATOM | 10 | HB   | VALM | 1 | -0.224 | 1.269  | -6.381 | 1.00 | 0.00 |
| ATOM | 11 | QG1  | VALM | 1 | 1.048  | -0.551 | -5.180 | 1.00 | 0.00 |
| ATOM | 12 | QG2  | VALM | 1 | -2.049 | -0.148 | -5.371 | 1.00 | 0.00 |
| ATOM | 13 | CG1  | VALM | 1 | 0.754  | -0.251 | -5.214 | 1.00 | 0.00 |
| ATOM | 14 | 1HG1 | VALM | 1 | 1.531  | 0.037  | -4.482 | 1.00 | 0.00 |
| ATOM | 15 | 2HG1 | VALM | 1 | 0.343  | -1.226 | -4.890 | 1.00 | 0.00 |
| ATOM | 16 | 3HG1 | VALM | 1 | 1.271  | -0.465 | -6.169 | 1.00 | 0.00 |
| ATOM | 17 | CG2  | VALM | 1 | -1.688 | 0.054  | -5.370 | 1.00 | 0.00 |
| ATOM | 18 | 1HG2 | VALM | 1 | -1.537 | -1.040 | -5.299 | 1.00 | 0.00 |
| ATOM | 19 | 2HG2 | VALM | 1 | -2.337 | 0.349  | -4.526 | 1.00 | 0.00 |
| ATOM | 20 | 3HG2 | VALM | 1 | -2.274 | 0.246  | -6.289 | 1.00 | 0.00 |
| ATOM | 21 | QQG  | VALM | 1 | -0.501 | -0.350 | -5.276 | 1.00 | 0.00 |
| ATOM | 22 | C    | VALM | 1 | 0.638  | 1.722  | -3.198 | 1.00 | 0.00 |
| ATOM | 23 | O    | VALM | 1 | 1.642  | 2.413  | -3.042 | 1.00 | 0.00 |
| ATOM | 24 | N    | PRO  | 2 | 0.294  | 0.672  | -2.405 | 1.00 | 0.00 |
| ATOM | 25 | CD   | PRO  | 2 | -0.889 | -0.170 | -2.560 | 1.00 | 0.00 |
| ATOM | 26 | CA   | PRO  | 2 | 1.125  | 0.282  | -1.278 | 1.00 | 0.00 |
| ATOM | 27 | HA   | PRO  | 2 | 1.444  | 1.092  | -0.786 | 1.00 | 0.00 |
| ATOM | 28 | CB   | PRO  | 2 | 0.230  | -0.589 | -0.412 | 1.00 | 0.00 |
| ATOM | 29 | 2HB  | PRO  | 2 | -0.143 | -0.032 | 0.447  | 1.00 | 0.00 |
| ATOM | 30 | QB   | PRO  | 2 | -0.143 | -0.032 | 0.447  | 1.00 | 0.00 |
| ATOM | 31 | CG   | PRO  | 2 | -0.912 | -1.035 | -1.310 | 1.00 | 0.00 |
| ATOM | 32 | 2HG  | PRO  | 2 | -1.867 | -0.932 | -0.793 | 1.00 | 0.00 |
| ATOM | 33 | QG   | PRO  | 2 | -1.867 | -0.932 | -0.793 | 1.00 | 0.00 |
| ATOM | 34 | 2HD  | PRO  | 2 | -1.794 | 0.431  | -2.643 | 1.00 | 0.00 |
| ATOM | 35 | QD   | PRO  | 2 | -1.794 | 0.431  | -2.643 | 1.00 | 0.00 |
| ATOM | 36 | C    | PRO  | 2 | 2.387  | -0.442 | -1.752 | 1.00 | 0.00 |
| ATOM | 37 | O    | PRO  | 2 | 2.396  | -1.043 | -2.826 | 1.00 | 0.00 |
| ATOM | 38 | N    | ILE  | 3 | 3.422  | -0.362 | -0.928 | 1.00 | 0.00 |
| ATOM | 39 | H    | ILE  | 3 | 3.406  | 0.127  | -0.057 | 1.00 | 0.00 |
| ATOM | 40 | CA   | ILE  | 3 | 4.686  | -1.004 | -1.249 | 1.00 | 0.00 |
| ATOM | 41 | HA   | ILE  | 3 | 4.677  | -1.225 | -2.317 | 1.00 | 0.00 |
| ATOM | 42 | CB   | ILE  | 3 | 5.851  | -0.047 | -0.995 | 1.00 | 0.00 |
| ATOM | 43 | HB   | ILE  | 3 | 6.559  | -0.540 | -0.329 | 1.00 | 0.00 |
| ATOM | 44 | QG2  | ILE  | 3 | 6.774  | 0.342  | -2.602 | 1.00 | 0.00 |
| ATOM | 45 | CG2  | ILE  | 3 | 6.597  | 0.268  | -2.294 | 1.00 | 0.00 |
| ATOM | 46 | 1HG2 | ILE  | 3 | 7.257  | -0.563 | -2.544 | 1.00 | 0.00 |
| ATOM | 47 | 2HG2 | ILE  | 3 | 5.877  | 0.415  | -3.099 | 1.00 | 0.00 |
| ATOM | 48 | 3HG2 | ILE  | 3 | 7.187  | 1.174  | -2.163 | 1.00 | 0.00 |
| ATOM | 49 | CG1  | ILE  | 3 | 5.374  | 1.223  | -0.286 | 1.00 | 0.00 |
| ATOM | 50 | 2HG1 | ILE  | 3 | 4.425  | 1.548  | -0.714 | 1.00 | 0.00 |
| ATOM | 51 | QG1  | ILE  | 3 | 4.425  | 1.548  | -0.714 | 1.00 | 0.00 |
| ATOM | 52 | QD1  | ILE  | 3 | 5.168  | 0.927  | 1.572  | 1.00 | 0.00 |
| ATOM | 53 | CD1  | ILE  | 3 | 5.207  | 0.983  | 1.215  | 1.00 | 0.00 |
| ATOM | 54 | 1HD1 | ILE  | 3 | 5.739  | 1.758  | 1.768  | 1.00 | 0.00 |
| ATOM | 55 | 2HD1 | ILE  | 3 | 4.149  | 1.015  | 1.473  | 1.00 | 0.00 |
| ATOM | 56 | 3HD1 | ILE  | 3 | 5.616  | 0.007  | 1.475  | 1.00 | 0.00 |
| ATOM | 57 | C    | ILE  | 3 | 4.793  | -2.322 | -0.481 | 1.00 | 0.00 |
| ATOM | 58 | O    | ILE  | 3 | 5.287  | -3.350 | -0.969 | 1.00 | 0.00 |
| ATOM | 59 | N    | PIP  | 4 | 4.319  | -2.291 | 0.750  | 1.00 | 0.00 |
| ATOM | 60 | CE   | PIP  | 4 | 3.740  | -1.099 | 1.331  | 1.00 | 0.00 |
| ATOM | 61 | CA   | PIP  | 4 | 4.354  | -3.448 | 1.631  | 1.00 | 0.00 |
| ATOM | 62 | HA   | PIP  | 4 | 5.343  | -3.907 | 1.652  | 1.00 | 0.00 |

|      |     |      |      |   |        |        |        |      |      |
|------|-----|------|------|---|--------|--------|--------|------|------|
| ATOM | 63  | CB   | PIP  | 4 | 3.997  | -3.070 | 3.080  | 1.00 | 0.00 |
| ATOM | 64  | 2HB  | PIP  | 4 | 4.034  | -3.960 | 3.708  | 1.00 | 0.00 |
| ATOM | 65  | 3HB  | PIP  | 4 | 4.710  | -2.335 | 3.451  | 1.00 | 0.00 |
| ATOM | 66  | QB   | PIP  | 4 | 4.372  | -3.147 | 3.579  | 1.00 | 0.00 |
| ATOM | 67  | CG   | PIP  | 4 | 2.577  | -2.474 | 3.120  | 1.00 | 0.00 |
| ATOM | 68  | 2HG  | PIP  | 4 | 2.324  | -2.206 | 4.146  | 1.00 | 0.00 |
| ATOM | 69  | 3HG  | PIP  | 4 | 1.863  | -3.208 | 2.750  | 1.00 | 0.00 |
| ATOM | 70  | QG   | PIP  | 4 | 2.093  | -2.707 | 3.448  | 1.00 | 0.00 |
| ATOM | 71  | CD   | PIP  | 4 | 2.569  | -1.492 | 2.251  | 1.00 | 0.00 |
| ATOM | 72  | 2HD  | PIP  | 4 | 2.133  | -0.594 | 2.689  | 1.00 | 0.00 |
| ATOM | 73  | 3HD  | PIP  | 4 | 1.812  | -2.018 | 1.670  | 1.00 | 0.00 |
| ATOM | 74  | QD   | PIP  | 4 | 1.972  | -1.306 | 2.180  | 1.00 | 0.00 |
| ATOM | 75  | 1HE  | PIP  | 4 | 4.497  | -0.573 | 1.912  | 1.00 | 0.00 |
| ATOM | 76  | 2HE  | PIP  | 4 | 3.375  | -0.448 | 0.537  | 1.00 | 0.00 |
| ATOM | 77  | QE   | PIP  | 4 | 3.936  | -0.511 | 1.224  | 1.00 | 0.00 |
| ATOM | 78  | C    | PIP  | 4 | 3.358  | -4.532 | 1.184  | 1.00 | 0.00 |
| ATOM | 79  | O    | PIP  | 4 | 2.685  | -4.254 | 0.193  | 1.00 | 0.00 |
| ATOM | 80  | N    | ALA  | 5 | 3.277  | -5.674 | 1.851  | 1.00 | 0.00 |
| ATOM | 81  | H    | ALA  | 5 | 3.829  | -5.892 | 2.656  | 1.00 | 0.00 |
| ATOM | 82  | CA   | ALA  | 5 | 2.350  | -6.715 | 1.441  | 1.00 | 0.00 |
| ATOM | 83  | HA   | ALA  | 5 | 2.769  | -7.205 | 0.562  | 1.00 | 0.00 |
| ATOM | 84  | QB   | ALA  | 5 | 2.181  | -7.992 | 2.829  | 1.00 | 0.00 |
| ATOM | 85  | CB   | ALA  | 5 | 2.214  | -7.747 | 2.562  | 1.00 | 0.00 |
| ATOM | 86  | 1HB  | ALA  | 5 | 3.163  | -7.840 | 3.090  | 1.00 | 0.00 |
| ATOM | 87  | 2HB  | ALA  | 5 | 1.440  | -7.425 | 3.260  | 1.00 | 0.00 |
| ATOM | 88  | 3HB  | ALA  | 5 | 1.939  | -8.712 | 2.136  | 1.00 | 0.00 |
| ATOM | 89  | C    | ALA  | 5 | 1.010  | -6.081 | 1.066  | 1.00 | 0.00 |
| ATOM | 90  | O    | ALA  | 5 | 0.660  | -5.015 | 1.572  | 1.00 | 0.00 |
| ATOM | 91  | N    | PRO  | 6 | 0.277  | -6.780 | 0.159  | 1.00 | 0.00 |
| ATOM | 92  | CD   | PRO  | 6 | 0.659  | -8.045 | -0.461 | 1.00 | 0.00 |
| ATOM | 93  | CA   | PRO  | 6 | -1.018 | -6.296 | -0.290 | 1.00 | 0.00 |
| ATOM | 94  | HA   | PRO  | 6 | -0.983 | -5.310 | -0.451 | 1.00 | 0.00 |
| ATOM | 95  | CB   | PRO  | 6 | -1.305 | -7.066 | -1.568 | 1.00 | 0.00 |
| ATOM | 96  | 2HB  | PRO  | 6 | -1.110 | -6.450 | -2.447 | 1.00 | 0.00 |
| ATOM | 97  | QB   | PRO  | 6 | -1.110 | -6.450 | -2.447 | 1.00 | 0.00 |
| ATOM | 98  | CG   | PRO  | 6 | -0.387 | -8.278 | -1.539 | 1.00 | 0.00 |
| ATOM | 99  | 2HG  | PRO  | 6 | 0.090  | -8.419 | -2.509 | 1.00 | 0.00 |
| ATOM | 100 | QG   | PRO  | 6 | 0.090  | -8.419 | -2.509 | 1.00 | 0.00 |
| ATOM | 101 | 2HD  | PRO  | 6 | 1.661  | -7.990 | -0.887 | 1.00 | 0.00 |
| ATOM | 102 | QD   | PRO  | 6 | 1.661  | -7.990 | -0.887 | 1.00 | 0.00 |
| ATOM | 103 | C    | PRO  | 6 | -2.085 | -6.506 | 0.786  | 1.00 | 0.00 |
| ATOM | 104 | O    | PRO  | 6 | -2.383 | -7.621 | 1.231  | 1.00 | 0.00 |
| ATOM | 105 | N    | THRM | 7 | -2.672 | -5.402 | 1.213  | 1.00 | 0.00 |
| ATOM | 106 | QB   | THRM | 7 | -3.963 | -5.624 | 2.510  | 1.00 | 0.00 |
| ATOM | 107 | CN   | THRM | 7 | -3.708 | -5.580 | 2.255  | 1.00 | 0.00 |
| ATOM | 108 | 1HNB | THRM | 7 | -3.806 | -6.640 | 2.493  | 1.00 | 0.00 |
| ATOM | 109 | 2HNB | THRM | 7 | -3.422 | -5.030 | 3.150  | 1.00 | 0.00 |
| ATOM | 110 | 3HNB | THRM | 7 | -4.662 | -5.203 | 1.887  | 1.00 | 0.00 |
| ATOM | 111 | CA   | THRM | 7 | -2.320 | -4.087 | 0.687  | 1.00 | 0.00 |
| ATOM | 112 | HA   | THRM | 7 | -1.223 | -4.045 | 0.558  | 1.00 | 0.00 |
| ATOM | 113 | CB   | THRM | 7 | -3.000 | -3.849 | -0.703 | 1.00 | 0.00 |
| ATOM | 114 | HB   | THRM | 7 | -3.483 | -2.849 | -0.690 | 1.00 | 0.00 |
| ATOM | 115 | QG2  | THRM | 7 | -1.827 | -3.944 | -2.271 | 1.00 | 0.00 |
| ATOM | 116 | OG1  | THRM | 7 | -4.000 | -4.833 | -0.943 | 1.00 | 0.00 |
| ATOM | 117 | 1HG  | THRM | 7 | -4.795 | -4.350 | -1.184 | 1.00 | 0.00 |
| ATOM | 118 | CG2  | THRM | 7 | -2.077 | -3.927 | -1.939 | 1.00 | 0.00 |
| ATOM | 119 | 1HG2 | THRM | 7 | -2.203 | -3.056 | -2.607 | 1.00 | 0.00 |
| ATOM | 120 | 2HG2 | THRM | 7 | -1.005 | -3.943 | -1.665 | 1.00 | 0.00 |
| ATOM | 121 | 3HG2 | THRM | 7 | -2.274 | -4.834 | -2.541 | 1.00 | 0.00 |



|      |     |      |      |    |        |        |       |      |      |
|------|-----|------|------|----|--------|--------|-------|------|------|
| ATOM | 122 | C    | THRM | 7  | -2.700 | -2.997 | 1.661 | 1.00 | 0.00 |
| ATOM | 123 | O    | THRM | 7  | -3.549 | -3.224 | 2.522 | 1.00 | 0.00 |
| ATOM | 124 | N    | VAL  | 8  | -2.075 | -1.839 | 1.510 | 1.00 | 0.00 |
| ATOM | 125 | H    | VAL  | 8  | -1.386 | -1.663 | 0.806 | 1.00 | 0.00 |
| ATOM | 126 | CA   | VAL  | 8  | -2.357 | -0.716 | 2.388 | 1.00 | 0.00 |
| ATOM | 127 | HA   | VAL  | 8  | -3.365 | -0.851 | 2.780 | 1.00 | 0.00 |
| ATOM | 128 | CB   | VAL  | 8  | -1.385 | -0.716 | 3.569 | 1.00 | 0.00 |
| ATOM | 129 | HB   | VAL  | 8  | -1.171 | 0.321  | 3.827 | 1.00 | 0.00 |
| ATOM | 130 | QG1  | VAL  | 8  | -2.160 | -1.546 | 5.084 | 1.00 | 0.00 |
| ATOM | 131 | QG2  | VAL  | 8  | 0.250  | -1.548 | 3.101 | 1.00 | 0.00 |
| ATOM | 132 | CG1  | VAL  | 8  | -2.011 | -1.387 | 4.793 | 1.00 | 0.00 |
| ATOM | 133 | 1HG1 | VAL  | 8  | -3.008 | -1.747 | 4.540 | 1.00 | 0.00 |
| ATOM | 134 | 2HG1 | VAL  | 8  | -1.390 | -2.226 | 5.105 | 1.00 | 0.00 |
| ATOM | 135 | 3HG1 | VAL  | 8  | -2.081 | -0.664 | 5.607 | 1.00 | 0.00 |
| ATOM | 136 | CG2  | VAL  | 8  | -0.064 | -1.388 | 3.191 | 1.00 | 0.00 |
| ATOM | 137 | 1HG2 | VAL  | 8  | 0.699  | -1.130 | 3.926 | 1.00 | 0.00 |
| ATOM | 138 | 2HG2 | VAL  | 8  | -0.198 | -2.470 | 3.173 | 1.00 | 0.00 |
| ATOM | 139 | 3HG2 | VAL  | 8  | 0.250  | -1.045 | 2.206 | 1.00 | 0.00 |
| ATOM | 140 | QQG  | VAL  | 8  | -0.955 | -1.547 | 4.093 | 1.00 | 0.00 |
| ATOM | 141 | C    | VAL  | 8  | -2.313 | 0.582  | 1.577 | 1.00 | 0.00 |
| ATOM | 142 | O    | VAL  | 8  | -1.921 | 0.631  | 0.405 | 1.00 | 0.00 |
| ATOM | 143 | N    | THRM | 9  | -2.726 | 1.657  | 2.222 | 1.00 | 0.00 |
| ATOM | 144 | QB   | THRM | 9  | -3.274 | 1.393  | 3.963 | 1.00 | 0.00 |
| ATOM | 145 | CN   | THRM | 9  | -3.166 | 1.445  | 3.619 | 1.00 | 0.00 |
| ATOM | 146 | 1HNB | THRM | 9  | -3.065 | 0.391  | 3.877 | 1.00 | 0.00 |
| ATOM | 147 | 2HNB | THRM | 9  | -2.548 | 2.044  | 4.290 | 1.00 | 0.00 |
| ATOM | 148 | 3HNB | THRM | 9  | -4.209 | 1.746  | 3.722 | 1.00 | 0.00 |
| ATOM | 149 | CA   | THRM | 9  | -2.748 | 2.975  | 1.595 | 1.00 | 0.00 |
| ATOM | 150 | HA   | THRM | 9  | -2.459 | 2.861  | 0.535 | 1.00 | 0.00 |
| ATOM | 151 | CB   | THRM | 9  | -4.186 | 3.591  | 1.661 | 1.00 | 0.00 |
| ATOM | 152 | HB   | THRM | 9  | -4.169 | 4.575  | 1.144 | 1.00 | 0.00 |
| ATOM | 153 | QG2  | THRM | 9  | -5.630 | 2.516  | 0.884 | 1.00 | 0.00 |
| ATOM | 154 | OG1  | THRM | 9  | -4.579 | 3.795  | 3.012 | 1.00 | 0.00 |
| ATOM | 155 | 1HG  | THRM | 9  | -3.858 | 4.275  | 3.431 | 1.00 | 0.00 |
| ATOM | 156 | CG2  | THRM | 9  | -5.324 | 2.743  | 1.052 | 1.00 | 0.00 |
| ATOM | 157 | 1HG2 | THRM | 9  | -6.133 | 3.370  | 0.635 | 1.00 | 0.00 |
| ATOM | 158 | 2HG2 | THRM | 9  | -4.975 | 2.108  | 0.215 | 1.00 | 0.00 |
| ATOM | 159 | 3HG2 | THRM | 9  | -5.781 | 2.071  | 1.801 | 1.00 | 0.00 |
| ATOM | 160 | C    | THRM | 9  | -1.741 | 3.898  | 2.240 | 1.00 | 0.00 |
| ATOM | 161 | O    | THRM | 9  | -2.081 | 4.843  | 2.924 | 1.00 | 0.00 |
| ATOM | 162 | N    | VALM | 10 | -0.472 | 3.616  | 2.017 | 1.00 | 0.00 |
| ATOM | 163 | QB   | VALM | 10 | -0.144 | 2.144  | 0.955 | 1.00 | 0.00 |
| ATOM | 164 | CN   | VALM | 10 | -0.209 | 2.434  | 1.164 | 1.00 | 0.00 |
| ATOM | 165 | 1HNB | VALM | 10 | -0.434 | 1.526  | 1.723 | 1.00 | 0.00 |
| ATOM | 166 | 2HNB | VALM | 10 | -0.838 | 2.479  | 0.276 | 1.00 | 0.00 |
| ATOM | 167 | 3HNB | VALM | 10 | 0.840  | 2.427  | 0.867 | 1.00 | 0.00 |
| ATOM | 168 | CA   | VALM | 10 | 0.610  | 4.422  | 2.576 | 1.00 | 0.00 |
| ATOM | 169 | HA   | VALM | 10 | 0.264  | 5.468  | 2.668 | 1.00 | 0.00 |
| ATOM | 170 | CB   | VALM | 10 | 1.002  | 3.874  | 4.005 | 1.00 | 0.00 |
| ATOM | 171 | HB   | VALM | 10 | 1.970  | 3.340  | 3.897 | 1.00 | 0.00 |
| ATOM | 172 | QG1  | VALM | 10 | 1.273  | 5.223  | 5.424 | 1.00 | 0.00 |
| ATOM | 173 | QG2  | VALM | 10 | -0.290 | 2.596  | 4.742 | 1.00 | 0.00 |
| ATOM | 174 | CG1  | VALM | 10 | 1.208  | 4.938  | 5.118 | 1.00 | 0.00 |
| ATOM | 175 | 1HG1 | VALM | 10 | 0.392  | 5.687  | 5.146 | 1.00 | 0.00 |
| ATOM | 176 | 2HG1 | VALM | 10 | 1.270  | 4.486  | 6.127 | 1.00 | 0.00 |
| ATOM | 177 | 3HG1 | VALM | 10 | 2.156  | 5.496  | 5.000 | 1.00 | 0.00 |
| ATOM | 178 | CG2  | VALM | 10 | -0.014 | 2.864  | 4.590 | 1.00 | 0.00 |
| ATOM | 179 | 1HG2 | VALM | 10 | 0.432  | 2.233  | 5.383 | 1.00 | 0.00 |
| ATOM | 180 | 2HG2 | VALM | 10 | -0.891 | 3.370  | 5.031 | 1.00 | 0.00 |

|      |     |      |      |    |        |       |        |      |      |
|------|-----|------|------|----|--------|-------|--------|------|------|
| ATOM | 181 | 3HG2 | VALM | 10 | -0.411 | 2.184 | 3.813  | 1.00 | 0.00 |
| ATOM | 182 | QQG  | VALM | 10 | 0.491  | 3.909 | 5.083  | 1.00 | 0.00 |
| ATOM | 183 | C    | VALM | 10 | 1.808  | 4.432 | 1.658  | 1.00 | 0.00 |
| ATOM | 184 | O    | VALM | 10 | 2.892  | 3.938 | 1.989  | 1.00 | 0.00 |
| ATOM | 185 | N    | ILEM | 11 | 1.629  | 5.000 | 0.479  | 1.00 | 0.00 |
| ATOM | 186 | QB   | ILEM | 11 | -0.054 | 5.682 | 0.158  | 1.00 | 0.00 |
| ATOM | 187 | CN   | ILEM | 11 | 0.278  | 5.547 | 0.221  | 1.00 | 0.00 |
| ATOM | 188 | 1HNB | ILEM | 11 | -0.356 | 5.376 | 1.091  | 1.00 | 0.00 |
| ATOM | 189 | 2HNB | ILEM | 11 | 0.350  | 6.618 | 0.030  | 1.00 | 0.00 |
| ATOM | 190 | 3HNB | ILEM | 11 | -0.156 | 5.052 | -0.647 | 1.00 | 0.00 |
| ATOM | 191 | CA   | ILEM | 11 | 2.699  | 5.082 | -0.511 | 1.00 | 0.00 |
| ATOM | 192 | HA   | ILEM | 11 | 2.307  | 5.641 | -1.381 | 1.00 | 0.00 |
| ATOM | 193 | CB   | ILEM | 11 | 3.953  | 5.862 | 0.059  | 1.00 | 0.00 |
| ATOM | 194 | HB   | ILEM | 11 | 3.814  | 5.925 | 1.159  | 1.00 | 0.00 |
| ATOM | 195 | QG2  | ILEM | 11 | 5.668  | 4.924 | -0.277 | 1.00 | 0.00 |
| ATOM | 196 | CG2  | ILEM | 11 | 5.298  | 5.117 | -0.202 | 1.00 | 0.00 |
| ATOM | 197 | 1HG2 | ILEM | 11 | 5.880  | 5.577 | -1.021 | 1.00 | 0.00 |
| ATOM | 198 | 2HG2 | ILEM | 11 | 5.982  | 5.137 | 0.664  | 1.00 | 0.00 |
| ATOM | 199 | 3HG2 | ILEM | 11 | 5.142  | 4.058 | -0.474 | 1.00 | 0.00 |
| ATOM | 200 | CG1  | ILEM | 11 | 4.099  | 7.328 | -0.461 | 1.00 | 0.00 |
| ATOM | 201 | 2HG1 | ILEM | 11 | 4.590  | 7.321 | -1.452 | 1.00 | 0.00 |
| ATOM | 202 | QG1  | ILEM | 11 | 4.590  | 7.321 | -1.452 | 1.00 | 0.00 |
| ATOM | 203 | QD1  | ILEM | 11 | 2.430  | 8.314 | -0.700 | 1.00 | 0.00 |
| ATOM | 204 | CD1  | ILEM | 11 | 2.784  | 8.111 | -0.646 | 1.00 | 0.00 |
| ATOM | 205 | 1HD1 | ILEM | 11 | 2.131  | 7.625 | -1.394 | 1.00 | 0.00 |
| ATOM | 206 | 2HD1 | ILEM | 11 | 2.207  | 8.175 | 0.295  | 1.00 | 0.00 |
| ATOM | 207 | 3HD1 | ILEM | 11 | 2.952  | 9.144 | -1.001 | 1.00 | 0.00 |
| ATOM | 208 | C    | ILEM | 11 | 3.074  | 3.710 | -1.017 | 1.00 | 0.00 |
| ATOM | 209 | O    | ILEM | 11 | 2.826  | 2.681 | -0.372 | 1.00 | 0.00 |
| ATOM | 210 | N    | PIPO | 12 | 3.680  | 3.672 | -2.189 | 1.00 | 0.00 |
| ATOM | 211 | CE   | PIPO | 12 | 4.102  | 2.434 | -2.807 | 1.00 | 0.00 |
| ATOM | 212 | CA   | PIPO | 12 | 3.990  | 4.873 | -2.950 | 1.00 | 0.00 |
| ATOM | 213 | HA   | PIPO | 12 | 4.480  | 5.625 | -2.330 | 1.00 | 0.00 |
| ATOM | 214 | CB   | PIPO | 12 | 4.931  | 4.572 | -4.131 | 1.00 | 0.00 |
| ATOM | 215 | 2HB  | PIPO | 12 | 5.139  | 5.493 | -4.674 | 1.00 | 0.00 |
| ATOM | 216 | 3HB  | PIPO | 12 | 5.864  | 4.153 | -3.754 | 1.00 | 0.00 |
| ATOM | 217 | QB   | PIPO | 12 | 5.502  | 4.823 | -4.214 | 1.00 | 0.00 |
| ATOM | 218 | CG   | PIPO | 12 | 4.259  | 3.559 | -5.077 | 1.00 | 0.00 |
| ATOM | 219 | 2HG  | PIPO | 12 | 4.925  | 3.345 | -5.912 | 1.00 | 0.00 |
| ATOM | 220 | 3HG  | PIPO | 12 | 3.326  | 3.977 | -5.454 | 1.00 | 0.00 |
| ATOM | 221 | QG   | PIPO | 12 | 4.126  | 3.661 | -5.683 | 1.00 | 0.00 |
| ATOM | 222 | CD   | PIPO | 12 | 3.922  | 2.534 | -4.334 | 1.00 | 0.00 |
| ATOM | 223 | 2HD  | PIPO | 12 | 4.239  | 1.600 | -4.799 | 1.00 | 0.00 |
| ATOM | 224 | 3HD  | PIPO | 12 | 2.873  | 2.716 | -4.566 | 1.00 | 0.00 |
| ATOM | 225 | QD   | PIPO | 12 | 3.556  | 2.158 | -4.682 | 1.00 | 0.00 |
| ATOM | 226 | 1HE  | PIPO | 12 | 5.151  | 2.250 | -2.577 | 1.00 | 0.00 |
| ATOM | 227 | 2HE  | PIPO | 12 | 3.498  | 1.611 | -2.424 | 1.00 | 0.00 |
| ATOM | 228 | QE   | PIPO | 12 | 4.324  | 1.931 | -2.500 | 1.00 | 0.00 |
| ATOM | 229 | C    | PIPO | 12 | 2.721  | 5.519 | -3.531 | 1.00 | 0.00 |
| ATOM | 230 | O    | PIPO | 12 | 2.552  | 6.731 | -3.351 | 1.00 | 0.00 |
| ATOM | 231 | O1'  | PHEO | 13 | 1.856  | 4.785 | -4.207 | 1.00 | 0.00 |
| ATOM | 232 | CA   | PHEO | 13 | 0.455  | 5.171 | -4.342 | 1.00 | 0.00 |
| ATOM | 233 | HA   | PHEO | 13 | 0.369  | 6.084 | -4.959 | 1.00 | 0.00 |
| ATOM | 234 | CB   | PHEO | 13 | -0.137 | 5.431 | -2.923 | 1.00 | 0.00 |
| ATOM | 235 | 2HB  | PHEO | 13 | 0.670  | 5.772 | -2.245 | 1.00 | 0.00 |
| ATOM | 236 | QB   | PHEO | 13 | 0.670  | 5.772 | -2.245 | 1.00 | 0.00 |
| ATOM | 237 | QD   | PHEO | 13 | -1.437 | 6.536 | -2.853 | 1.00 | 0.00 |
| ATOM | 238 | QE   | PHEO | 13 | -3.353 | 8.080 | -2.810 | 1.00 | 0.00 |
| ATOM | 239 | QR   | PHEO | 13 | -2.779 | 7.617 | -2.823 | 1.00 | 0.00 |

Supplementary Material for Organic & Biomolecular Chemistry  
 This journal is © The Royal Society of Chemistry 2006

|          |     |      |      |    |        |        |        |      |      |
|----------|-----|------|------|----|--------|--------|--------|------|------|
| ATOM     | 240 | CG   | PHEO | 13 | -1.296 | 6.437  | -2.839 | 1.00 | 0.00 |
| ATOM     | 241 | CD1  | PHEO | 13 | -2.486 | 6.069  | -2.202 | 1.00 | 0.00 |
| ATOM     | 242 | 1HD  | PHEO | 13 | -2.582 | 5.089  | -1.754 | 1.00 | 0.00 |
| ATOM     | 243 | CE1  | PHEO | 13 | -3.573 | 6.937  | -2.187 | 1.00 | 0.00 |
| ATOM     | 244 | 1HE  | PHEO | 13 | -4.496 | 6.631  | -1.718 | 1.00 | 0.00 |
| ATOM     | 245 | CZ   | PHEO | 13 | -3.471 | 8.186  | -2.796 | 1.00 | 0.00 |
| ATOM     | 246 | HZ   | PHEO | 13 | -4.317 | 8.856  | -2.788 | 1.00 | 0.00 |
| ATOM     | 247 | CE2  | PHEO | 13 | -2.285 | 8.564  | -3.423 | 1.00 | 0.00 |
| ATOM     | 248 | 2HE  | PHEO | 13 | -2.209 | 9.529  | -3.901 | 1.00 | 0.00 |
| ATOM     | 249 | CD2  | PHEO | 13 | -1.200 | 7.691  | -3.448 | 1.00 | 0.00 |
| ATOM     | 250 | 2HD  | PHEO | 13 | -0.291 | 7.982  | -3.953 | 1.00 | 0.00 |
| ATOM     | 251 | C    | PHEO | 13 | -0.349 | 4.069  | -4.989 | 1.00 | 0.00 |
| ATOM     | 252 | O    | PHEO | 13 | -1.587 | 4.186  | -5.213 | 1.00 | 0.00 |
| TER      |     |      |      |    |        |        |        |      |      |
| ENDMDL   |     |      |      |    |        |        |        |      |      |
| MODEL 11 |     |      |      |    |        |        |        |      |      |
| ATOM     | 1   | N    | VALM | 1  | 0.057  | 3.256  | -5.029 | 1.00 | 0.00 |
| ATOM     | 2   | QB   | VALM | 1  | 1.123  | 3.264  | -6.534 | 1.00 | 0.00 |
| ATOM     | 3   | CN   | VALM | 1  | 0.912  | 3.262  | -6.237 | 1.00 | 0.00 |
| ATOM     | 4   | 1HNB | VALM | 1  | 1.945  | 3.464  | -5.951 | 1.00 | 0.00 |
| ATOM     | 5   | 2HNB | VALM | 1  | 0.855  | 2.291  | -6.729 | 1.00 | 0.00 |
| ATOM     | 6   | 3HNB | VALM | 1  | 0.568  | 4.037  | -6.922 | 1.00 | 0.00 |
| ATOM     | 7   | CA   | VALM | 1  | -0.319 | 2.017  | -4.354 | 1.00 | 0.00 |
| ATOM     | 8   | HA   | VALM | 1  | -1.328 | 2.142  | -3.917 | 1.00 | 0.00 |
| ATOM     | 9   | CB   | VALM | 1  | -0.344 | 0.827  | -5.393 | 1.00 | 0.00 |
| ATOM     | 10  | HB   | VALM | 1  | -0.221 | 1.272  | -6.404 | 1.00 | 0.00 |
| ATOM     | 11  | QG1  | VALM | 1  | 1.071  | -0.539 | -5.209 | 1.00 | 0.00 |
| ATOM     | 12  | QG2  | VALM | 1  | -2.030 | -0.175 | -5.408 | 1.00 | 0.00 |
| ATOM     | 13  | CG1  | VALM | 1  | 0.774  | -0.242 | -5.243 | 1.00 | 0.00 |
| ATOM     | 14  | 1HG1 | VALM | 1  | 1.564  | 0.069  | -4.534 | 1.00 | 0.00 |
| ATOM     | 15  | 2HG1 | VALM | 1  | 0.380  | -1.214 | -4.888 | 1.00 | 0.00 |
| ATOM     | 16  | 3HG1 | VALM | 1  | 1.270  | -0.472 | -6.204 | 1.00 | 0.00 |
| ATOM     | 17  | CG2  | VALM | 1  | -1.672 | 0.032  | -5.404 | 1.00 | 0.00 |
| ATOM     | 18  | 1HG2 | VALM | 1  | -1.507 | -1.060 | -5.336 | 1.00 | 0.00 |
| ATOM     | 19  | 2HG2 | VALM | 1  | -2.328 | 0.315  | -4.562 | 1.00 | 0.00 |
| ATOM     | 20  | 3HG2 | VALM | 1  | -2.256 | 0.219  | -6.325 | 1.00 | 0.00 |
| ATOM     | 21  | QQG  | VALM | 1  | -0.479 | -0.357 | -5.308 | 1.00 | 0.00 |
| ATOM     | 22  | C    | VALM | 1  | 0.622  | 1.715  | -3.213 | 1.00 | 0.00 |
| ATOM     | 23  | O    | VALM | 1  | 1.624  | 2.412  | -3.053 | 1.00 | 0.00 |
| ATOM     | 24  | N    | PRO  | 2  | 0.282  | 0.663  | -2.422 | 1.00 | 0.00 |
| ATOM     | 25  | CD   | PRO  | 2  | -0.897 | -0.184 | -2.581 | 1.00 | 0.00 |
| ATOM     | 26  | CA   | PRO  | 2  | 1.110  | 0.277  | -1.293 | 1.00 | 0.00 |
| ATOM     | 27  | HA   | PRO  | 2  | 1.423  | 1.088  | -0.798 | 1.00 | 0.00 |
| ATOM     | 28  | CB   | PRO  | 2  | 0.216  | -0.599 | -0.430 | 1.00 | 0.00 |
| ATOM     | 29  | 2HB  | PRO  | 2  | -0.162 | -0.045 | 0.429  | 1.00 | 0.00 |
| ATOM     | 30  | QB   | PRO  | 2  | -0.162 | -0.045 | 0.429  | 1.00 | 0.00 |
| ATOM     | 31  | CG   | PRO  | 2  | -0.921 | -1.050 | -1.332 | 1.00 | 0.00 |
| ATOM     | 32  | 2HG  | PRO  | 2  | -1.877 | -0.953 | -0.818 | 1.00 | 0.00 |
| ATOM     | 33  | QG   | PRO  | 2  | -1.877 | -0.953 | -0.818 | 1.00 | 0.00 |
| ATOM     | 34  | 2HD  | PRO  | 2  | -1.805 | 0.412  | -2.667 | 1.00 | 0.00 |
| ATOM     | 35  | QD   | PRO  | 2  | -1.805 | 0.412  | -2.667 | 1.00 | 0.00 |
| ATOM     | 36  | C    | PRO  | 2  | 2.377  | -0.442 | -1.762 | 1.00 | 0.00 |
| ATOM     | 37  | O    | PRO  | 2  | 2.401  | -1.019 | -2.848 | 1.00 | 0.00 |
| ATOM     | 38  | N    | ILE  | 3  | 3.398  | -0.382 | -0.921 | 1.00 | 0.00 |
| ATOM     | 39  | H    | ILE  | 3  | 3.371  | 0.089  | -0.040 | 1.00 | 0.00 |
| ATOM     | 40  | CA   | ILE  | 3  | 4.665  | -1.020 | -1.236 | 1.00 | 0.00 |
| ATOM     | 41  | HA   | ILE  | 3  | 4.662  | -1.243 | -2.303 | 1.00 | 0.00 |
| ATOM     | 42  | CB   | ILE  | 3  | 5.828  | -0.059 | -0.978 | 1.00 | 0.00 |
| ATOM     | 43  | HB   | ILE  | 3  | 6.533  | -0.549 | -0.308 | 1.00 | 0.00 |

|      |     |      |     |   |        |        |        |      |      |
|------|-----|------|-----|---|--------|--------|--------|------|------|
| ATOM | 44  | QG2  | ILE | 3 | 6.758  | 0.327  | -2.582 | 1.00 | 0.00 |
| ATOM | 45  | CG2  | ILE | 3 | 6.579  | 0.253  | -2.274 | 1.00 | 0.00 |
| ATOM | 46  | 1HG2 | ILE | 3 | 5.863  | 0.396  | -3.084 | 1.00 | 0.00 |
| ATOM | 47  | 2HG2 | ILE | 3 | 7.168  | 1.161  | -2.144 | 1.00 | 0.00 |
| ATOM | 48  | 3HG2 | ILE | 3 | 7.242  | -0.578 | -2.518 | 1.00 | 0.00 |
| ATOM | 49  | CG1  | ILE | 3 | 5.344  | 1.211  | -0.277 | 1.00 | 0.00 |
| ATOM | 50  | 2HG1 | ILE | 3 | 4.396  | 1.531  | -0.710 | 1.00 | 0.00 |
| ATOM | 51  | QG1  | ILE | 3 | 4.396  | 1.531  | -0.710 | 1.00 | 0.00 |
| ATOM | 52  | QD1  | ILE | 3 | 5.130  | 0.920  | 1.582  | 1.00 | 0.00 |
| ATOM | 53  | CD1  | ILE | 3 | 5.171  | 0.976  | 1.224  | 1.00 | 0.00 |
| ATOM | 54  | 1HD1 | ILE | 3 | 5.697  | 1.754  | 1.778  | 1.00 | 0.00 |
| ATOM | 55  | 2HD1 | ILE | 3 | 4.111  | 1.005  | 1.478  | 1.00 | 0.00 |
| ATOM | 56  | 3HD1 | ILE | 3 | 5.581  | 0.002  | 1.490  | 1.00 | 0.00 |
| ATOM | 57  | C    | ILE | 3 | 4.774  | -2.337 | -0.466 | 1.00 | 0.00 |
| ATOM | 58  | O    | ILE | 3 | 5.276  | -3.364 | -0.950 | 1.00 | 0.00 |
| ATOM | 59  | N    | PIP | 4 | 4.292  | -2.307 | 0.762  | 1.00 | 0.00 |
| ATOM | 60  | CE   | PIP | 4 | 3.706  | -1.117 | 1.339  | 1.00 | 0.00 |
| ATOM | 61  | CA   | PIP | 4 | 4.327  | -3.462 | 1.645  | 1.00 | 0.00 |
| ATOM | 62  | HA   | PIP | 4 | 5.317  | -3.918 | 1.672  | 1.00 | 0.00 |
| ATOM | 63  | CB   | PIP | 4 | 3.959  | -3.085 | 3.092  | 1.00 | 0.00 |
| ATOM | 64  | 2HB  | PIP | 4 | 3.996  | -3.973 | 3.721  | 1.00 | 0.00 |
| ATOM | 65  | 3HB  | PIP | 4 | 4.667  | -2.346 | 3.465  | 1.00 | 0.00 |
| ATOM | 66  | QB   | PIP | 4 | 4.331  | -3.159 | 3.593  | 1.00 | 0.00 |
| ATOM | 67  | CG   | PIP | 4 | 2.538  | -2.493 | 3.122  | 1.00 | 0.00 |
| ATOM | 68  | 2HG  | PIP | 4 | 2.277  | -2.226 | 4.146  | 1.00 | 0.00 |
| ATOM | 69  | 3HG  | PIP | 4 | 1.828  | -3.232 | 2.749  | 1.00 | 0.00 |
| ATOM | 70  | QG   | PIP | 4 | 2.053  | -2.729 | 3.447  | 1.00 | 0.00 |
| ATOM | 71  | CD   | PIP | 4 | 2.531  | -1.513 | 2.251  | 1.00 | 0.00 |
| ATOM | 72  | 2HD  | PIP | 4 | 2.089  | -0.616 | 2.685  | 1.00 | 0.00 |
| ATOM | 73  | 3HD  | PIP | 4 | 1.778  | -2.042 | 1.667  | 1.00 | 0.00 |
| ATOM | 74  | QD   | PIP | 4 | 1.933  | -1.329 | 2.176  | 1.00 | 0.00 |
| ATOM | 75  | 1HE  | PIP | 4 | 4.457  | -0.587 | 1.923  | 1.00 | 0.00 |
| ATOM | 76  | 2HE  | PIP | 4 | 3.343  | -0.468 | 0.541  | 1.00 | 0.00 |
| ATOM | 77  | QE   | PIP | 4 | 3.900  | -0.528 | 1.232  | 1.00 | 0.00 |
| ATOM | 78  | C    | PIP | 4 | 3.339  | -4.551 | 1.193  | 1.00 | 0.00 |
| ATOM | 79  | O    | PIP | 4 | 2.689  | -4.288 | 0.182  | 1.00 | 0.00 |
| ATOM | 80  | N    | ALA | 5 | 3.237  | -5.681 | 1.878  | 1.00 | 0.00 |
| ATOM | 81  | H    | ALA | 5 | 3.769  | -5.886 | 2.700  | 1.00 | 0.00 |
| ATOM | 82  | CA   | ALA | 5 | 2.318  | -6.726 | 1.465  | 1.00 | 0.00 |
| ATOM | 83  | HA   | ALA | 5 | 2.756  | -7.234 | 0.605  | 1.00 | 0.00 |
| ATOM | 84  | QB   | ALA | 5 | 2.110  | -7.978 | 2.870  | 1.00 | 0.00 |
| ATOM | 85  | CB   | ALA | 5 | 2.150  | -7.738 | 2.601  | 1.00 | 0.00 |
| ATOM | 86  | 1HB  | ALA | 5 | 3.039  | -8.367 | 2.662  | 1.00 | 0.00 |
| ATOM | 87  | 2HB  | ALA | 5 | 2.015  | -7.207 | 3.542  | 1.00 | 0.00 |
| ATOM | 88  | 3HB  | ALA | 5 | 1.277  | -8.361 | 2.406  | 1.00 | 0.00 |
| ATOM | 89  | C    | ALA | 5 | 0.988  | -6.094 | 1.047  | 1.00 | 0.00 |
| ATOM | 90  | O    | ALA | 5 | 0.633  | -5.017 | 1.522  | 1.00 | 0.00 |
| ATOM | 91  | N    | PRO | 6 | 0.272  | -6.810 | 0.138  | 1.00 | 0.00 |
| ATOM | 92  | CD   | PRO | 6 | 0.662  | -8.090 | -0.446 | 1.00 | 0.00 |
| ATOM | 93  | CA   | PRO | 6 | -1.010 | -6.330 | -0.349 | 1.00 | 0.00 |
| ATOM | 94  | HA   | PRO | 6 | -0.967 | -5.348 | -0.531 | 1.00 | 0.00 |
| ATOM | 95  | CB   | PRO | 6 | -1.271 | -7.126 | -1.617 | 1.00 | 0.00 |
| ATOM | 96  | 2HB  | PRO | 6 | -1.055 | -6.530 | -2.505 | 1.00 | 0.00 |
| ATOM | 97  | QB   | PRO | 6 | -1.055 | -6.530 | -2.505 | 1.00 | 0.00 |
| ATOM | 98  | CG   | PRO | 6 | -0.360 | -8.341 | -1.542 | 1.00 | 0.00 |
| ATOM | 99  | 2HG  | PRO | 6 | 0.137  | -8.505 | -2.498 | 1.00 | 0.00 |
| ATOM | 100 | QG   | PRO | 6 | 0.137  | -8.505 | -2.498 | 1.00 | 0.00 |
| ATOM | 101 | 2HD  | PRO | 6 | 1.674  | -8.048 | -0.850 | 1.00 | 0.00 |
| ATOM | 102 | QD   | PRO | 6 | 1.674  | -8.048 | -0.850 | 1.00 | 0.00 |

|      |     |      |      |   |        |        |        |      |      |
|------|-----|------|------|---|--------|--------|--------|------|------|
| ATOM | 103 | C    | PRO  | 6 | -2.101 | -6.512 | 0.707  | 1.00 | 0.00 |
| ATOM | 104 | O    | PRO  | 6 | -2.490 | -7.623 | 1.088  | 1.00 | 0.00 |
| ATOM | 105 | N    | THRM | 7 | -2.604 | -5.391 | 1.189  | 1.00 | 0.00 |
| ATOM | 106 | QB   | THRM | 7 | -3.923 | -5.580 | 2.464  | 1.00 | 0.00 |
| ATOM | 107 | CN   | THRM | 7 | -3.663 | -5.542 | 2.212  | 1.00 | 0.00 |
| ATOM | 108 | 1HNB | THRM | 7 | -3.845 | -6.602 | 2.393  | 1.00 | 0.00 |
| ATOM | 109 | 2HNB | THRM | 7 | -3.343 | -5.066 | 3.138  | 1.00 | 0.00 |
| ATOM | 110 | 3HNB | THRM | 7 | -4.580 | -5.072 | 1.860  | 1.00 | 0.00 |
| ATOM | 111 | CA   | THRM | 7 | -2.145 | -4.080 | 0.738  | 1.00 | 0.00 |
| ATOM | 112 | HA   | THRM | 7 | -1.040 | -4.087 | 0.718  | 1.00 | 0.00 |
| ATOM | 113 | CB   | THRM | 7 | -2.673 | -3.779 | -0.705 | 1.00 | 0.00 |
| ATOM | 114 | HB   | THRM | 7 | -1.803 | -3.740 | -1.395 | 1.00 | 0.00 |
| ATOM | 115 | QG2  | THRM | 7 | -3.984 | -5.041 | -1.434 | 1.00 | 0.00 |
| ATOM | 116 | OG1  | THRM | 7 | -3.336 | -2.521 | -0.739 | 1.00 | 0.00 |
| ATOM | 117 | 1HG  | THRM | 7 | -3.351 | -2.252 | -1.663 | 1.00 | 0.00 |
| ATOM | 118 | CG2  | THRM | 7 | -3.704 | -4.775 | -1.279 | 1.00 | 0.00 |
| ATOM | 119 | 1HG2 | THRM | 7 | -4.650 | -4.769 | -0.709 | 1.00 | 0.00 |
| ATOM | 120 | 2HG2 | THRM | 7 | -3.981 | -4.541 | -2.324 | 1.00 | 0.00 |
| ATOM | 121 | 3HG2 | THRM | 7 | -3.321 | -5.813 | -1.269 | 1.00 | 0.00 |
| ATOM | 122 | C    | THRM | 7 | -2.572 | -2.997 | 1.700  | 1.00 | 0.00 |
| ATOM | 123 | O    | THRM | 7 | -3.384 | -3.260 | 2.585  | 1.00 | 0.00 |
| ATOM | 124 | N    | VAL  | 8 | -2.022 | -1.807 | 1.515  | 1.00 | 0.00 |
| ATOM | 125 | H    | VAL  | 8 | -1.361 | -1.602 | 0.793  | 1.00 | 0.00 |
| ATOM | 126 | CA   | VAL  | 8 | -2.355 | -0.687 | 2.378  | 1.00 | 0.00 |
| ATOM | 127 | HA   | VAL  | 8 | -3.375 | -0.835 | 2.732  | 1.00 | 0.00 |
| ATOM | 128 | CB   | VAL  | 8 | -1.429 | -0.670 | 3.595  | 1.00 | 0.00 |
| ATOM | 129 | HB   | VAL  | 8 | -1.214 | 0.370  | 3.840  | 1.00 | 0.00 |
| ATOM | 130 | QG1  | VAL  | 8 | -2.271 | -1.458 | 5.098  | 1.00 | 0.00 |
| ATOM | 131 | QG2  | VAL  | 8 | 0.214  | -1.530 | 3.210  | 1.00 | 0.00 |
| ATOM | 132 | CG1  | VAL  | 8 | -2.109 | -1.307 | 4.810  | 1.00 | 0.00 |
| ATOM | 133 | 1HG1 | VAL  | 8 | -3.038 | -1.784 | 4.497  | 1.00 | 0.00 |
| ATOM | 134 | 2HG1 | VAL  | 8 | -1.446 | -2.053 | 5.247  | 1.00 | 0.00 |
| ATOM | 135 | 3HG1 | VAL  | 8 | -2.328 | -0.536 | 5.548  | 1.00 | 0.00 |
| ATOM | 136 | CG2  | VAL  | 8 | -0.101 | -1.365 | 3.284  | 1.00 | 0.00 |
| ATOM | 137 | 1HG2 | VAL  | 8 | -0.228 | -2.445 | 3.366  | 1.00 | 0.00 |
| ATOM | 138 | 2HG2 | VAL  | 8 | 0.212  | -1.111 | 2.271  | 1.00 | 0.00 |
| ATOM | 139 | 3HG2 | VAL  | 8 | 0.658  | -1.033 | 3.993  | 1.00 | 0.00 |
| ATOM | 140 | QQG  | VAL  | 8 | -1.028 | -1.494 | 4.154  | 1.00 | 0.00 |
| ATOM | 141 | C    | VAL  | 8 | -2.299 | 0.610  | 1.567  | 1.00 | 0.00 |
| ATOM | 142 | O    | VAL  | 8 | -1.880 | 0.660  | 0.405  | 1.00 | 0.00 |
| ATOM | 143 | N    | THRM | 9 | -2.734 | 1.684  | 2.201  | 1.00 | 0.00 |
| ATOM | 144 | QB   | THRM | 9 | -3.321 | 1.419  | 3.929  | 1.00 | 0.00 |
| ATOM | 145 | CN   | THRM | 9 | -3.205 | 1.471  | 3.588  | 1.00 | 0.00 |
| ATOM | 146 | 1HNB | THRM | 9 | -3.104 | 0.418  | 3.850  | 1.00 | 0.00 |
| ATOM | 147 | 2HNB | THRM | 9 | -2.607 | 2.074  | 4.271  | 1.00 | 0.00 |
| ATOM | 148 | 3HNB | THRM | 9 | -4.252 | 1.766  | 3.665  | 1.00 | 0.00 |
| ATOM | 149 | CA   | THRM | 9 | -2.749 | 3.001  | 1.572  | 1.00 | 0.00 |
| ATOM | 150 | HA   | THRM | 9 | -2.443 | 2.886  | 0.516  | 1.00 | 0.00 |
| ATOM | 151 | CB   | THRM | 9 | -4.190 | 3.614  | 1.614  | 1.00 | 0.00 |
| ATOM | 152 | HB   | THRM | 9 | -4.285 | 4.219  | 2.541  | 1.00 | 0.00 |
| ATOM | 153 | QG2  | THRM | 9 | -4.700 | 4.740  | 0.092  | 1.00 | 0.00 |
| ATOM | 154 | OG1  | THRM | 9 | -5.169 | 2.584  | 1.641  | 1.00 | 0.00 |
| ATOM | 155 | 1HG  | THRM | 9 | -5.939 | 2.959  | 2.078  | 1.00 | 0.00 |
| ATOM | 156 | CG2  | THRM | 9 | -4.592 | 4.498  | 0.414  | 1.00 | 0.00 |
| ATOM | 157 | 1HG2 | THRM | 9 | -5.303 | 5.294  | 0.703  | 1.00 | 0.00 |
| ATOM | 158 | 2HG2 | THRM | 9 | -3.727 | 5.019  | -0.037 | 1.00 | 0.00 |
| ATOM | 159 | 3HG2 | THRM | 9 | -5.071 | 3.907  | -0.389 | 1.00 | 0.00 |
| ATOM | 160 | C    | THRM | 9 | -1.756 | 3.927  | 2.232  | 1.00 | 0.00 |
| ATOM | 161 | O    | THRM | 9 | -2.107 | 4.858  | 2.926  | 1.00 | 0.00 |

|      |     |      |      |    |        |       |        |      |      |
|------|-----|------|------|----|--------|-------|--------|------|------|
| ATOM | 162 | N    | VALM | 10 | -0.481 | 3.664 | 2.007  | 1.00 | 0.00 |
| ATOM | 163 | QB   | VALM | 10 | -0.135 | 2.209 | 0.927  | 1.00 | 0.00 |
| ATOM | 164 | CN   | VALM | 10 | -0.203 | 2.496 | 1.140  | 1.00 | 0.00 |
| ATOM | 165 | 1HNB | VALM | 10 | -0.839 | 2.540 | 0.256  | 1.00 | 0.00 |
| ATOM | 166 | 2HNB | VALM | 10 | 0.843  | 2.510 | 0.836  | 1.00 | 0.00 |
| ATOM | 167 | 3HNB | VALM | 10 | -0.410 | 1.578 | 1.690  | 1.00 | 0.00 |
| ATOM | 168 | CA   | VALM | 10 | 0.589  | 4.475 | 2.580  | 1.00 | 0.00 |
| ATOM | 169 | HA   | VALM | 10 | 0.243  | 5.522 | 2.651  | 1.00 | 0.00 |
| ATOM | 170 | CB   | VALM | 10 | 0.950  | 3.944 | 4.024  | 1.00 | 0.00 |
| ATOM | 171 | HB   | VALM | 10 | 1.888  | 3.358 | 3.934  | 1.00 | 0.00 |
| ATOM | 172 | QG1  | VALM | 10 | 1.288  | 5.314 | 5.408  | 1.00 | 0.00 |
| ATOM | 173 | QG2  | VALM | 10 | -0.409 | 2.754 | 4.789  | 1.00 | 0.00 |
| ATOM | 174 | CG1  | VALM | 10 | 1.209  | 5.024 | 5.110  | 1.00 | 0.00 |
| ATOM | 175 | 1HG1 | VALM | 10 | 0.347  | 5.706 | 5.245  | 1.00 | 0.00 |
| ATOM | 176 | 2HG1 | VALM | 10 | 1.431  | 4.581 | 6.100  | 1.00 | 0.00 |
| ATOM | 177 | 3HG1 | VALM | 10 | 2.087  | 5.655 | 4.878  | 1.00 | 0.00 |
| ATOM | 178 | CG2  | VALM | 10 | -0.119 | 3.003 | 4.631  | 1.00 | 0.00 |
| ATOM | 179 | 1HG2 | VALM | 10 | 0.288  | 2.379 | 5.449  | 1.00 | 0.00 |
| ATOM | 180 | 2HG2 | VALM | 10 | -0.975 | 3.565 | 5.047  | 1.00 | 0.00 |
| ATOM | 181 | 3HG2 | VALM | 10 | -0.541 | 2.317 | 3.873  | 1.00 | 0.00 |
| ATOM | 182 | QQG  | VALM | 10 | 0.439  | 4.034 | 5.098  | 1.00 | 0.00 |
| ATOM | 183 | C    | VALM | 10 | 1.807  | 4.471 | 1.687  | 1.00 | 0.00 |
| ATOM | 184 | O    | VALM | 10 | 2.890  | 4.000 | 2.057  | 1.00 | 0.00 |
| ATOM | 185 | N    | ILEM | 11 | 1.647  | 5.001 | 0.489  | 1.00 | 0.00 |
| ATOM | 186 | QB   | ILEM | 11 | -0.035 | 5.655 | 0.112  | 1.00 | 0.00 |
| ATOM | 187 | CN   | ILEM | 11 | 0.297  | 5.525 | 0.186  | 1.00 | 0.00 |
| ATOM | 188 | 1HNB | ILEM | 11 | -0.354 | 5.373 | 1.047  | 1.00 | 0.00 |
| ATOM | 189 | 2HNB | ILEM | 11 | 0.362  | 6.591 | -0.035 | 1.00 | 0.00 |
| ATOM | 190 | 3HNB | ILEM | 11 | -0.112 | 5.000 | -0.676 | 1.00 | 0.00 |
| ATOM | 191 | CA   | ILEM | 11 | 2.738  | 5.067 | -0.480 | 1.00 | 0.00 |
| ATOM | 192 | HA   | ILEM | 11 | 2.378  | 5.646 | -1.350 | 1.00 | 0.00 |
| ATOM | 193 | CB   | ILEM | 11 | 4.001  | 5.806 | 0.124  | 1.00 | 0.00 |
| ATOM | 194 | HB   | ILEM | 11 | 3.834  | 5.878 | 1.219  | 1.00 | 0.00 |
| ATOM | 195 | QG2  | ILEM | 11 | 5.689  | 4.806 | -0.170 | 1.00 | 0.00 |
| ATOM | 196 | CG2  | ILEM | 11 | 5.328  | 5.017 | -0.099 | 1.00 | 0.00 |
| ATOM | 197 | 1HG2 | ILEM | 11 | 5.450  | 4.688 | -1.147 | 1.00 | 0.00 |
| ATOM | 198 | 2HG2 | ILEM | 11 | 6.231  | 5.619 | 0.105  | 1.00 | 0.00 |
| ATOM | 199 | 3HG2 | ILEM | 11 | 5.385  | 4.112 | 0.533  | 1.00 | 0.00 |
| ATOM | 200 | CG1  | ILEM | 11 | 4.210  | 7.266 | -0.395 | 1.00 | 0.00 |
| ATOM | 201 | 2HG1 | ILEM | 11 | 4.554  | 7.908 | 0.438  | 1.00 | 0.00 |
| ATOM | 202 | QG1  | ILEM | 11 | 4.554  | 7.908 | 0.438  | 1.00 | 0.00 |
| ATOM | 203 | QD1  | ILEM | 11 | 5.534  | 7.476 | -1.816 | 1.00 | 0.00 |
| ATOM | 204 | CD1  | ILEM | 11 | 5.254  | 7.438 | -1.518 | 1.00 | 0.00 |
| ATOM | 205 | 1HD1 | ILEM | 11 | 5.946  | 6.577 | -1.555 | 1.00 | 0.00 |
| ATOM | 206 | 2HD1 | ILEM | 11 | 4.776  | 7.513 | -2.513 | 1.00 | 0.00 |
| ATOM | 207 | 3HD1 | ILEM | 11 | 5.878  | 8.339 | -1.381 | 1.00 | 0.00 |
| ATOM | 208 | C    | ILEM | 11 | 3.086  | 3.691 | -0.996 | 1.00 | 0.00 |
| ATOM | 209 | O    | ILEM | 11 | 2.845  | 2.664 | -0.344 | 1.00 | 0.00 |
| ATOM | 210 | N    | PIPO | 12 | 3.663  | 3.648 | -2.182 | 1.00 | 0.00 |
| ATOM | 211 | CE   | PIPO | 12 | 4.056  | 2.405 | -2.811 | 1.00 | 0.00 |
| ATOM | 212 | CA   | PIPO | 12 | 3.965  | 4.846 | -2.949 | 1.00 | 0.00 |
| ATOM | 213 | HA   | PIPO | 12 | 4.478  | 5.593 | -2.342 | 1.00 | 0.00 |
| ATOM | 214 | CB   | PIPO | 12 | 4.873  | 4.536 | -4.154 | 1.00 | 0.00 |
| ATOM | 215 | 2HB  | PIPO | 12 | 5.077  | 5.455 | -4.702 | 1.00 | 0.00 |
| ATOM | 216 | 3HB  | PIPO | 12 | 5.812  | 4.108 | -3.801 | 1.00 | 0.00 |
| ATOM | 217 | QB   | PIPO | 12 | 5.445  | 4.781 | -4.251 | 1.00 | 0.00 |
| ATOM | 218 | CG   | PIPO | 12 | 4.168  | 3.531 | -5.083 | 1.00 | 0.00 |
| ATOM | 219 | 2HG  | PIPO | 12 | 4.811  | 3.311 | -5.936 | 1.00 | 0.00 |
| ATOM | 220 | 3HG  | PIPO | 12 | 3.230  | 3.959 | -5.436 | 1.00 | 0.00 |

Supplementary Material for Organic & Biomolecular Chemistry  
 This journal is © The Royal Society of Chemistry 2006

|                 |     |      |      |    |        |        |        |      |      |
|-----------------|-----|------|------|----|--------|--------|--------|------|------|
| ATOM            | 221 | QG   | PIPO | 12 | 4.020  | 3.635  | -5.686 | 1.00 | 0.00 |
| ATOM            | 222 | CD   | PIPO | 12 | 3.839  | 2.508  | -4.332 | 1.00 | 0.00 |
| ATOM            | 223 | 2HD  | PIPO | 12 | 4.136  | 1.572  | -4.806 | 1.00 | 0.00 |
| ATOM            | 224 | 3HD  | PIPO | 12 | 2.786  | 2.701  | -4.538 | 1.00 | 0.00 |
| ATOM            | 225 | OD   | PIPO | 12 | 3.461  | 2.137  | -4.672 | 1.00 | 0.00 |
| ATOM            | 226 | 1HE  | PIPO | 12 | 5.109  | 2.212  | -2.606 | 1.00 | 0.00 |
| ATOM            | 227 | 2HE  | PIPO | 12 | 3.453  | 1.589  | -2.413 | 1.00 | 0.00 |
| ATOM            | 228 | QE   | PIPO | 12 | 4.281  | 1.900  | -2.510 | 1.00 | 0.00 |
| ATOM            | 229 | C    | PIPO | 12 | 2.689  | 5.505  | -3.499 | 1.00 | 0.00 |
| ATOM            | 230 | O    | PIPO | 12 | 2.504  | 6.703  | -3.255 | 1.00 | 0.00 |
| ATOM            | 231 | O1'  | PHEO | 13 | 1.835  | 4.797  | -4.214 | 1.00 | 0.00 |
| ATOM            | 232 | CA   | PHEO | 13 | 0.431  | 5.178  | -4.343 | 1.00 | 0.00 |
| ATOM            | 233 | HA   | PHEO | 13 | 0.341  | 6.084  | -4.972 | 1.00 | 0.00 |
| ATOM            | 234 | CB   | PHEO | 13 | -0.149 | 5.455  | -2.924 | 1.00 | 0.00 |
| ATOM            | 235 | 2HB  | PHEO | 13 | 0.671  | 5.760  | -2.244 | 1.00 | 0.00 |
| ATOM            | 236 | QB   | PHEO | 13 | 0.671  | 5.760  | -2.244 | 1.00 | 0.00 |
| ATOM            | 237 | QD   | PHEO | 13 | -1.399 | 6.615  | -2.852 | 1.00 | 0.00 |
| ATOM            | 238 | QE   | PHEO | 13 | -3.236 | 8.254  | -2.819 | 1.00 | 0.00 |
| ATOM            | 239 | QR   | PHEO | 13 | -2.686 | 7.763  | -2.830 | 1.00 | 0.00 |
| ATOM            | 240 | CG   | PHEO | 13 | -1.267 | 6.506  | -2.835 | 1.00 | 0.00 |
| ATOM            | 241 | CD1  | PHEO | 13 | -2.560 | 6.112  | -2.471 | 1.00 | 0.00 |
| ATOM            | 242 | 1HD  | PHEO | 13 | -2.766 | 5.077  | -2.235 | 1.00 | 0.00 |
| ATOM            | 243 | CE1  | PHEO | 13 | -3.599 | 7.036  | -2.464 | 1.00 | 0.00 |
| ATOM            | 244 | 1HE  | PHEO | 13 | -4.600 | 6.715  | -2.211 | 1.00 | 0.00 |
| ATOM            | 245 | CZ   | PHEO | 13 | -3.351 | 8.363  | -2.805 | 1.00 | 0.00 |
| ATOM            | 246 | HZ   | PHEO | 13 | -4.161 | 9.077  | -2.804 | 1.00 | 0.00 |
| ATOM            | 247 | CE2  | PHEO | 13 | -2.064 | 8.765  | -3.157 | 1.00 | 0.00 |
| ATOM            | 248 | 2HE  | PHEO | 13 | -1.873 | 9.793  | -3.428 | 1.00 | 0.00 |
| ATOM            | 249 | CD2  | PHEO | 13 | -1.024 | 7.839  | -3.175 | 1.00 | 0.00 |
| ATOM            | 250 | 2HD  | PHEO | 13 | -0.033 | 8.154  | -3.470 | 1.00 | 0.00 |
| ATOM            | 251 | C    | PHEO | 13 | -0.375 | 4.067  | -4.971 | 1.00 | 0.00 |
| ATOM            | 252 | O    | PHEO | 13 | -1.565 | 4.240  | -5.357 | 1.00 | 0.00 |
| <u>TER</u>      |     |      |      |    |        |        |        |      |      |
| <u>ENDMDL</u>   |     |      |      |    |        |        |        |      |      |
| <u>MODEL</u> 12 |     |      |      |    |        |        |        |      |      |
| ATOM            | 1   | N    | VALM | 1  | -0.677 | 3.402  | -4.457 | 1.00 | 0.00 |
| ATOM            | 2   | QB   | VALM | 1  | -2.404 | 4.027  | -4.616 | 1.00 | 0.00 |
| ATOM            | 3   | CN   | VALM | 1  | -2.064 | 3.903  | -4.586 | 1.00 | 0.00 |
| ATOM            | 4   | 1HNB | VALM | 1  | -2.071 | 4.797  | -5.209 | 1.00 | 0.00 |
| ATOM            | 5   | 2HNB | VALM | 1  | -2.687 | 3.136  | -5.043 | 1.00 | 0.00 |
| ATOM            | 6   | 3HNB | VALM | 1  | -2.455 | 4.148  | -3.597 | 1.00 | 0.00 |
| ATOM            | 7   | CA   | VALM | 1  | -0.376 | 1.977  | -4.358 | 1.00 | 0.00 |
| ATOM            | 8   | HA   | VALM | 1  | -1.311 | 1.430  | -4.133 | 1.00 | 0.00 |
| ATOM            | 9   | CB   | VALM | 1  | 0.217  | 1.458  | -5.727 | 1.00 | 0.00 |
| ATOM            | 10  | HB   | VALM | 1  | 1.048  | 2.141  | -6.005 | 1.00 | 0.00 |
| ATOM            | 11  | QG1  | VALM | 1  | 0.964  | -0.372 | -5.713 | 1.00 | 0.00 |
| ATOM            | 12  | QG2  | VALM | 1  | -1.064 | 1.477  | -7.214 | 1.00 | 0.00 |
| ATOM            | 13  | CG1  | VALM | 1  | 0.810  | 0.022  | -5.722 | 1.00 | 0.00 |
| ATOM            | 14  | 1HG1 | VALM | 1  | 1.675  | -0.082 | -6.404 | 1.00 | 0.00 |
| ATOM            | 15  | 2HG1 | VALM | 1  | 1.148  | -0.289 | -4.715 | 1.00 | 0.00 |
| ATOM            | 16  | 3HG1 | VALM | 1  | 0.068  | -0.744 | -6.020 | 1.00 | 0.00 |
| ATOM            | 17  | CG2  | VALM | 1  | -0.797 | 1.476  | -6.897 | 1.00 | 0.00 |
| ATOM            | 18  | 1HG2 | VALM | 1  | -1.760 | 1.940  | -6.610 | 1.00 | 0.00 |
| ATOM            | 19  | 2HG2 | VALM | 1  | -0.412 | 2.036  | -7.767 | 1.00 | 0.00 |
| ATOM            | 20  | 3HG2 | VALM | 1  | -1.020 | 0.456  | -7.263 | 1.00 | 0.00 |
| ATOM            | 21  | QQG  | VALM | 1  | -0.050 | 0.553  | -6.463 | 1.00 | 0.00 |
| ATOM            | 22  | C    | VALM | 1  | 0.580  | 1.703  | -3.221 | 1.00 | 0.00 |
| ATOM            | 23  | O    | VALM | 1  | 1.566  | 2.422  | -3.073 | 1.00 | 0.00 |
| ATOM            | 24  | N    | PRO  | 2  | 0.267  | 0.649  | -2.420 | 1.00 | 0.00 |

|      |    |      |     |   |        |        |        |      |      |
|------|----|------|-----|---|--------|--------|--------|------|------|
| ATOM | 25 | CD   | PRO | 2 | -0.893 | -0.224 | -2.566 | 1.00 | 0.00 |
| ATOM | 26 | CA   | PRO | 2 | 1.112  | 0.290  | -1.294 | 1.00 | 0.00 |
| ATOM | 27 | HA   | PRO | 2 | 1.410  | 1.110  | -0.808 | 1.00 | 0.00 |
| ATOM | 28 | CB   | PRO | 2 | 0.243  | -0.600 | -0.420 | 1.00 | 0.00 |
| ATOM | 29 | 2HB  | PRO | 2 | -0.142 | -0.048 | 0.438  | 1.00 | 0.00 |
| ATOM | 30 | QB   | PRO | 2 | -0.142 | -0.048 | 0.438  | 1.00 | 0.00 |
| ATOM | 31 | CG   | PRO | 2 | -0.890 | -1.082 | -1.310 | 1.00 | 0.00 |
| ATOM | 32 | 2HG  | PRO | 2 | -1.845 | -1.001 | -0.791 | 1.00 | 0.00 |
| ATOM | 33 | QG   | PRO | 2 | -1.845 | -1.001 | -0.791 | 1.00 | 0.00 |
| ATOM | 34 | 2HD  | PRO | 2 | -1.814 | 0.352  | -2.649 | 1.00 | 0.00 |
| ATOM | 35 | QD   | PRO | 2 | -1.814 | 0.352  | -2.649 | 1.00 | 0.00 |
| ATOM | 36 | C    | PRO | 2 | 2.391  | -0.404 | -1.768 | 1.00 | 0.00 |
| ATOM | 37 | O    | PRO | 2 | 2.441  | -0.930 | -2.878 | 1.00 | 0.00 |
| ATOM | 38 | N    | ILE | 3 | 3.394  | -0.383 | -0.901 | 1.00 | 0.00 |
| ATOM | 39 | H    | ILE | 3 | 3.343  | 0.046  | 0.001  | 1.00 | 0.00 |
| ATOM | 40 | CA   | ILE | 3 | 4.669  | -1.003 | -1.216 | 1.00 | 0.00 |
| ATOM | 41 | HA   | ILE | 3 | 4.675  | -1.212 | -2.286 | 1.00 | 0.00 |
| ATOM | 42 | CB   | ILE | 3 | 5.819  | -0.034 | -0.938 | 1.00 | 0.00 |
| ATOM | 43 | HB   | ILE | 3 | 6.517  | -0.518 | -0.254 | 1.00 | 0.00 |
| ATOM | 44 | QG2  | ILE | 3 | 6.774  | 0.360  | -2.524 | 1.00 | 0.00 |
| ATOM | 45 | CG2  | ILE | 3 | 6.591  | 0.284  | -2.220 | 1.00 | 0.00 |
| ATOM | 46 | 1HG2 | ILE | 3 | 7.089  | 1.248  | -2.114 | 1.00 | 0.00 |
| ATOM | 47 | 2HG2 | ILE | 3 | 7.335  | -0.492 | -2.398 | 1.00 | 0.00 |
| ATOM | 48 | 3HG2 | ILE | 3 | 5.897  | 0.324  | -3.061 | 1.00 | 0.00 |
| ATOM | 49 | CG1  | ILE | 3 | 5.313  | 1.232  | -0.244 | 1.00 | 0.00 |
| ATOM | 50 | 2HG1 | ILE | 3 | 4.358  | 1.530  | -0.674 | 1.00 | 0.00 |
| ATOM | 51 | QG1  | ILE | 3 | 4.358  | 1.530  | -0.674 | 1.00 | 0.00 |
| ATOM | 52 | QD1  | ILE | 3 | 5.114  | 0.953  | 1.618  | 1.00 | 0.00 |
| ATOM | 53 | CD1  | ILE | 3 | 5.152  | 1.006  | 1.261  | 1.00 | 0.00 |
| ATOM | 54 | 1HD1 | ILE | 3 | 5.599  | 0.050  | 1.534  | 1.00 | 0.00 |
| ATOM | 55 | 2HD1 | ILE | 3 | 5.651  | 1.809  | 1.804  | 1.00 | 0.00 |
| ATOM | 56 | 3HD1 | ILE | 3 | 4.093  | 0.999  | 1.517  | 1.00 | 0.00 |
| ATOM | 57 | C    | ILE | 3 | 4.786  | -2.330 | -0.463 | 1.00 | 0.00 |
| ATOM | 58 | O    | ILE | 3 | 5.272  | -3.353 | -0.968 | 1.00 | 0.00 |
| ATOM | 59 | N    | PIP | 4 | 4.329  | -2.311 | 0.775  | 1.00 | 0.00 |
| ATOM | 60 | CE   | PIP | 4 | 3.759  | -1.124 | 1.376  | 1.00 | 0.00 |
| ATOM | 61 | CA   | PIP | 4 | 4.375  | -3.476 | 1.644  | 1.00 | 0.00 |
| ATOM | 62 | HA   | PIP | 4 | 5.363  | -3.937 | 1.646  | 1.00 | 0.00 |
| ATOM | 63 | CB   | PIP | 4 | 4.038  | -3.113 | 3.102  | 1.00 | 0.00 |
| ATOM | 64 | 2HB  | PIP | 4 | 4.083  | -4.009 | 3.720  | 1.00 | 0.00 |
| ATOM | 65 | 3HB  | PIP | 4 | 4.757  | -2.381 | 3.470  | 1.00 | 0.00 |
| ATOM | 66 | QB   | PIP | 4 | 4.420  | -3.195 | 3.595  | 1.00 | 0.00 |
| ATOM | 67 | CG   | PIP | 4 | 2.621  | -2.515 | 3.167  | 1.00 | 0.00 |
| ATOM | 68 | 2HG  | PIP | 4 | 2.381  | -2.258 | 4.199  | 1.00 | 0.00 |
| ATOM | 69 | 3HG  | PIP | 4 | 1.900  | -3.247 | 2.800  | 1.00 | 0.00 |
| ATOM | 70 | QG   | PIP | 4 | 2.140  | -2.752 | 3.499  | 1.00 | 0.00 |
| ATOM | 71 | CD   | PIP | 4 | 2.601  | -1.526 | 2.308  | 1.00 | 0.00 |
| ATOM | 72 | 2HD  | PIP | 4 | 2.172  | -0.631 | 2.760  | 1.00 | 0.00 |
| ATOM | 73 | 3HD  | PIP | 4 | 1.835  | -2.045 | 1.733  | 1.00 | 0.00 |
| ATOM | 74 | QD   | PIP | 4 | 2.003  | -1.338 | 2.246  | 1.00 | 0.00 |
| ATOM | 75 | 1HE  | PIP | 4 | 4.525  | -0.605 | 1.951  | 1.00 | 0.00 |
| ATOM | 76 | 2HE  | PIP | 4 | 3.384  | -0.465 | 0.593  | 1.00 | 0.00 |
| ATOM | 77 | QE   | PIP | 4 | 3.954  | -0.535 | 1.272  | 1.00 | 0.00 |
| ATOM | 78 | C    | PIP | 4 | 3.373  | -4.555 | 1.199  | 1.00 | 0.00 |
| ATOM | 79 | O    | PIP | 4 | 2.675  | -4.261 | 0.230  | 1.00 | 0.00 |
| ATOM | 80 | N    | ALA | 5 | 3.310  | -5.710 | 1.847  | 1.00 | 0.00 |
| ATOM | 81 | H    | ALA | 5 | 3.881  | -5.941 | 2.635  | 1.00 | 0.00 |
| ATOM | 82 | CA   | ALA | 5 | 2.376  | -6.746 | 1.439  | 1.00 | 0.00 |
| ATOM | 83 | HA   | ALA | 5 | 2.790  | -7.236 | 0.558  | 1.00 | 0.00 |



|      |     |      |      |   |        |        |        |      |      |
|------|-----|------|------|---|--------|--------|--------|------|------|
| ATOM | 84  | QB   | ALA  | 5 | 2.208  | -8.025 | 2.825  | 1.00 | 0.00 |
| ATOM | 85  | CB   | ALA  | 5 | 2.240  | -7.780 | 2.560  | 1.00 | 0.00 |
| ATOM | 86  | 1HB  | ALA  | 5 | 2.586  | -7.346 | 3.497  | 1.00 | 0.00 |
| ATOM | 87  | 2HB  | ALA  | 5 | 1.195  | -8.073 | 2.658  | 1.00 | 0.00 |
| ATOM | 88  | 3HB  | ALA  | 5 | 2.842  | -8.656 | 2.320  | 1.00 | 0.00 |
| ATOM | 89  | C    | ALA  | 5 | 1.037  | -6.105 | 1.072  | 1.00 | 0.00 |
| ATOM | 90  | O    | ALA  | 5 | 0.695  | -5.038 | 1.580  | 1.00 | 0.00 |
| ATOM | 91  | N    | PRO  | 6 | 0.296  | -6.799 | 0.168  | 1.00 | 0.00 |
| ATOM | 92  | CD   | PRO  | 6 | 0.669  | -8.066 | -0.454 | 1.00 | 0.00 |
| ATOM | 93  | CA   | PRO  | 6 | -0.998 | -6.310 | -0.274 | 1.00 | 0.00 |
| ATOM | 94  | HA   | PRO  | 6 | -0.960 | -5.324 | -0.435 | 1.00 | 0.00 |
| ATOM | 95  | CB   | PRO  | 6 | -1.295 | -7.078 | -1.552 | 1.00 | 0.00 |
| ATOM | 96  | 2HB  | PRO  | 6 | -1.103 | -6.463 | -2.430 | 1.00 | 0.00 |
| ATOM | 97  | QB   | PRO  | 6 | -1.103 | -6.463 | -2.430 | 1.00 | 0.00 |
| ATOM | 98  | CG   | PRO  | 6 | -0.384 | -8.294 | -1.528 | 1.00 | 0.00 |
| ATOM | 99  | 2HG  | PRO  | 6 | 0.087  | -8.438 | -2.500 | 1.00 | 0.00 |
| ATOM | 100 | QG   | PRO  | 6 | 0.087  | -8.438 | -2.500 | 1.00 | 0.00 |
| ATOM | 101 | 2HD  | PRO  | 6 | 1.668  | -8.017 | -0.885 | 1.00 | 0.00 |
| ATOM | 102 | QD   | PRO  | 6 | 1.668  | -8.017 | -0.885 | 1.00 | 0.00 |
| ATOM | 103 | C    | PRO  | 6 | -2.061 | -6.515 | 0.808  | 1.00 | 0.00 |
| ATOM | 104 | O    | PRO  | 6 | -2.353 | -7.627 | 1.263  | 1.00 | 0.00 |
| ATOM | 105 | N    | THRM | 7 | -2.651 | -5.411 | 1.227  | 1.00 | 0.00 |
| ATOM | 106 | QB   | THRM | 7 | -3.937 | -5.627 | 2.531  | 1.00 | 0.00 |
| ATOM | 107 | CN   | THRM | 7 | -3.683 | -5.584 | 2.273  | 1.00 | 0.00 |
| ATOM | 108 | 1HNB | THRM | 7 | -3.775 | -6.641 | 2.523  | 1.00 | 0.00 |
| ATOM | 109 | 2HNB | THRM | 7 | -3.396 | -5.026 | 3.164  | 1.00 | 0.00 |
| ATOM | 110 | 3HNB | THRM | 7 | -4.639 | -5.213 | 1.905  | 1.00 | 0.00 |
| ATOM | 111 | CA   | THRM | 7 | -2.307 | -4.098 | 0.690  | 1.00 | 0.00 |
| ATOM | 112 | HA   | THRM | 7 | -1.210 | -4.050 | 0.561  | 1.00 | 0.00 |
| ATOM | 113 | CB   | THRM | 7 | -2.986 | -3.878 | -0.703 | 1.00 | 0.00 |
| ATOM | 114 | HB   | THRM | 7 | -3.487 | -2.886 | -0.695 | 1.00 | 0.00 |
| ATOM | 115 | QG2  | THRM | 7 | -1.812 | -3.962 | -2.271 | 1.00 | 0.00 |
| ATOM | 116 | OG1  | THRM | 7 | -3.968 | -4.879 | -0.943 | 1.00 | 0.00 |
| ATOM | 117 | 1HG  | THRM | 7 | -4.805 | -4.507 | -0.647 | 1.00 | 0.00 |
| ATOM | 118 | CG2  | THRM | 7 | -2.059 | -3.944 | -1.937 | 1.00 | 0.00 |
| ATOM | 119 | 1HG2 | THRM | 7 | -2.256 | -4.835 | -2.558 | 1.00 | 0.00 |
| ATOM | 120 | 2HG2 | THRM | 7 | -2.188 | -3.075 | -2.608 | 1.00 | 0.00 |
| ATOM | 121 | 3HG2 | THRM | 7 | -0.992 | -3.975 | -1.645 | 1.00 | 0.00 |
| ATOM | 122 | C    | THRM | 7 | -2.695 | -3.001 | 1.652  | 1.00 | 0.00 |
| ATOM | 123 | O    | THRM | 7 | -3.548 | -3.222 | 2.510  | 1.00 | 0.00 |
| ATOM | 124 | N    | VAL  | 8 | -2.067 | -1.844 | 1.498  | 1.00 | 0.00 |
| ATOM | 125 | H    | VAL  | 8 | -1.374 | -1.672 | 0.798  | 1.00 | 0.00 |
| ATOM | 126 | CA   | VAL  | 8 | -2.356 | -0.715 | 2.364  | 1.00 | 0.00 |
| ATOM | 127 | HA   | VAL  | 8 | -3.361 | -0.855 | 2.764  | 1.00 | 0.00 |
| ATOM | 128 | CB   | VAL  | 8 | -1.378 | -0.692 | 3.540  | 1.00 | 0.00 |
| ATOM | 129 | HB   | VAL  | 8 | -1.165 | 0.349  | 3.779  | 1.00 | 0.00 |
| ATOM | 130 | QG1  | VAL  | 8 | -2.142 | -1.497 | 5.074  | 1.00 | 0.00 |
| ATOM | 131 | QG2  | VAL  | 8 | 0.257  | -1.529 | 3.077  | 1.00 | 0.00 |
| ATOM | 132 | CG1  | VAL  | 8 | -1.995 | -1.343 | 4.779  | 1.00 | 0.00 |
| ATOM | 133 | 1HG1 | VAL  | 8 | -2.965 | -1.769 | 4.522  | 1.00 | 0.00 |
| ATOM | 134 | 2HG1 | VAL  | 8 | -1.336 | -2.132 | 5.142  | 1.00 | 0.00 |
| ATOM | 135 | 3HG1 | VAL  | 8 | -2.123 | -0.591 | 5.559  | 1.00 | 0.00 |
| ATOM | 136 | CG2  | VAL  | 8 | -0.057 | -1.368 | 3.167  | 1.00 | 0.00 |
| ATOM | 137 | 1HG2 | VAL  | 8 | -0.213 | -2.443 | 3.069  | 1.00 | 0.00 |
| ATOM | 138 | 2HG2 | VAL  | 8 | 0.302  | -0.966 | 2.218  | 1.00 | 0.00 |
| ATOM | 139 | 3HG2 | VAL  | 8 | 0.682  | -1.177 | 3.944  | 1.00 | 0.00 |
| ATOM | 140 | QQG  | VAL  | 8 | -0.942 | -1.513 | 4.076  | 1.00 | 0.00 |
| ATOM | 141 | C    | VAL  | 8 | -2.331 | 0.574  | 1.540  | 1.00 | 0.00 |
| ATOM | 142 | O    | VAL  | 8 | -1.949 | 0.615  | 0.365  | 1.00 | 0.00 |

|      |     |      |      |    |        |       |        |      |      |
|------|-----|------|------|----|--------|-------|--------|------|------|
| ATOM | 143 | N    | THRM | 9  | -2.748 | 1.652 | 2.179  | 1.00 | 0.00 |
| ATOM | 144 | QB   | THRM | 9  | -3.279 | 1.403 | 3.926  | 1.00 | 0.00 |
| ATOM | 145 | CN   | THRM | 9  | -3.175 | 1.453 | 3.581  | 1.00 | 0.00 |
| ATOM | 146 | 1HNB | THRM | 9  | -3.062 | 0.402 | 3.849  | 1.00 | 0.00 |
| ATOM | 147 | 2HNB | THRM | 9  | -2.557 | 2.063 | 4.240  | 1.00 | 0.00 |
| ATOM | 148 | 3HNB | THRM | 9  | -4.219 | 1.745 | 3.690  | 1.00 | 0.00 |
| ATOM | 149 | CA   | THRM | 9  | -2.787 | 2.964 | 1.537  | 1.00 | 0.00 |
| ATOM | 150 | HA   | THRM | 9  | -2.507 | 2.841 | 0.475  | 1.00 | 0.00 |
| ATOM | 151 | CB   | THRM | 9  | -4.230 | 3.569 | 1.610  | 1.00 | 0.00 |
| ATOM | 152 | HB   | THRM | 9  | -4.225 | 4.549 | 1.088  | 1.00 | 0.00 |
| ATOM | 153 | QG2  | THRM | 9  | -5.673 | 2.477 | 0.858  | 1.00 | 0.00 |
| ATOM | 154 | OG1  | THRM | 9  | -4.614 | 3.779 | 2.964  | 1.00 | 0.00 |
| ATOM | 155 | 1HG  | THRM | 9  | -4.357 | 4.681 | 3.177  | 1.00 | 0.00 |
| ATOM | 156 | CG2  | THRM | 9  | -5.364 | 2.707 | 1.016  | 1.00 | 0.00 |
| ATOM | 157 | 1HG2 | THRM | 9  | -5.983 | 2.236 | 1.801  | 1.00 | 0.00 |
| ATOM | 158 | 2HG2 | THRM | 9  | -6.065 | 3.299 | 0.398  | 1.00 | 0.00 |
| ATOM | 159 | 3HG2 | THRM | 9  | -4.972 | 1.896 | 0.376  | 1.00 | 0.00 |
| ATOM | 160 | C    | THRM | 9  | -1.782 | 3.902 | 2.163  | 1.00 | 0.00 |
| ATOM | 161 | O    | THRM | 9  | -2.123 | 4.860 | 2.828  | 1.00 | 0.00 |
| ATOM | 162 | N    | VALM | 10 | -0.512 | 3.618 | 1.945  | 1.00 | 0.00 |
| ATOM | 163 | QB   | VALM | 10 | -0.183 | 2.126 | 0.913  | 1.00 | 0.00 |
| ATOM | 164 | CN   | VALM | 10 | -0.248 | 2.420 | 1.117  | 1.00 | 0.00 |
| ATOM | 165 | 1HNB | VALM | 10 | 0.802  | 2.406 | 0.822  | 1.00 | 0.00 |
| ATOM | 166 | 2HNB | VALM | 10 | -0.475 | 1.523 | 1.691  | 1.00 | 0.00 |
| ATOM | 167 | 3HNB | VALM | 10 | -0.874 | 2.449 | 0.225  | 1.00 | 0.00 |
| ATOM | 168 | CA   | VALM | 10 | 0.567  | 4.438 | 2.487  | 1.00 | 0.00 |
| ATOM | 169 | HA   | VALM | 10 | 0.230  | 5.490 | 2.528  | 1.00 | 0.00 |
| ATOM | 170 | CB   | VALM | 10 | 0.932  | 3.948 | 3.945  | 1.00 | 0.00 |
| ATOM | 171 | HB   | VALM | 10 | 1.870  | 3.360 | 3.868  | 1.00 | 0.00 |
| ATOM | 172 | QG1  | VALM | 10 | 1.275  | 5.357 | 5.287  | 1.00 | 0.00 |
| ATOM | 173 | QG2  | VALM | 10 | -0.423 | 2.777 | 4.744  | 1.00 | 0.00 |
| ATOM | 174 | CG1  | VALM | 10 | 1.194  | 5.059 | 4.999  | 1.00 | 0.00 |
| ATOM | 175 | 1HG1 | VALM | 10 | 0.285  | 5.646 | 5.231  | 1.00 | 0.00 |
| ATOM | 176 | 2HG1 | VALM | 10 | 1.570  | 4.649 | 5.956  | 1.00 | 0.00 |
| ATOM | 177 | 3HG1 | VALM | 10 | 1.970  | 5.777 | 4.674  | 1.00 | 0.00 |
| ATOM | 178 | CG2  | VALM | 10 | -0.135 | 3.024 | 4.581  | 1.00 | 0.00 |
| ATOM | 179 | 1HG2 | VALM | 10 | 0.061  | 2.834 | 5.653  | 1.00 | 0.00 |
| ATOM | 180 | 2HG2 | VALM | 10 | -1.150 | 3.455 | 4.506  | 1.00 | 0.00 |
| ATOM | 181 | 3HG2 | VALM | 10 | -0.182 | 2.041 | 4.075  | 1.00 | 0.00 |
| ATOM | 182 | QQG  | VALM | 10 | 0.426  | 4.067 | 5.016  | 1.00 | 0.00 |
| ATOM | 183 | C    | VALM | 10 | 1.781  | 4.398 | 1.589  | 1.00 | 0.00 |
| ATOM | 184 | O    | VALM | 10 | 2.809  | 3.786 | 1.903  | 1.00 | 0.00 |
| ATOM | 185 | N    | ILEM | 11 | 1.678  | 5.055 | 0.448  | 1.00 | 0.00 |
| ATOM | 186 | QB   | ILEM | 11 | 0.071  | 5.908 | 0.149  | 1.00 | 0.00 |
| ATOM | 187 | CN   | ILEM | 11 | 0.389  | 5.739 | 0.208  | 1.00 | 0.00 |
| ATOM | 188 | 1HNB | ILEM | 11 | -0.277 | 5.570 | 1.055  | 1.00 | 0.00 |
| ATOM | 189 | 2HNB | ILEM | 11 | 0.560  | 6.809 | 0.090  | 1.00 | 0.00 |
| ATOM | 190 | 3HNB | ILEM | 11 | -0.070 | 5.344 | -0.698 | 1.00 | 0.00 |
| ATOM | 191 | CA   | ILEM | 11 | 2.771  | 5.103 | -0.518 | 1.00 | 0.00 |
| ATOM | 192 | HA   | ILEM | 11 | 2.418  | 5.677 | -1.394 | 1.00 | 0.00 |
| ATOM | 193 | CB   | ILEM | 11 | 4.038  | 5.839 | 0.082  | 1.00 | 0.00 |
| ATOM | 194 | HB   | ILEM | 11 | 4.879  | 5.115 | 0.030  | 1.00 | 0.00 |
| ATOM | 195 | QG2  | ILEM | 11 | 4.568  | 7.437 | -0.969 | 1.00 | 0.00 |
| ATOM | 196 | CG2  | ILEM | 11 | 4.450  | 7.099 | -0.740 | 1.00 | 0.00 |
| ATOM | 197 | 1HG2 | ILEM | 11 | 5.445  | 6.991 | -1.207 | 1.00 | 0.00 |
| ATOM | 198 | 2HG2 | ILEM | 11 | 3.773  | 7.309 | -1.586 | 1.00 | 0.00 |
| ATOM | 199 | 3HG2 | ILEM | 11 | 4.486  | 8.011 | -0.114 | 1.00 | 0.00 |
| ATOM | 200 | CG1  | ILEM | 11 | 3.899  | 6.260 | 1.580  | 1.00 | 0.00 |
| ATOM | 201 | 2HG1 | ILEM | 11 | 4.769  | 6.877 | 1.872  | 1.00 | 0.00 |

Supplementary Material for Organic & Biomolecular Chemistry  
 This journal is © The Royal Society of Chemistry 2006

|        |     |      |      |    |        |       |        |      |      |
|--------|-----|------|------|----|--------|-------|--------|------|------|
| ATOM   | 202 | QG1  | ILEM | 11 | 4.769  | 6.877 | 1.872  | 1.00 | 0.00 |
| ATOM   | 203 | QD1  | ILEM | 11 | 2.322  | 7.323 | 2.027  | 1.00 | 0.00 |
| ATOM   | 204 | CD1  | ILEM | 11 | 2.650  | 7.094 | 1.932  | 1.00 | 0.00 |
| ATOM   | 205 | 1HD1 | ILEM | 11 | 2.923  | 7.992 | 2.517  | 1.00 | 0.00 |
| ATOM   | 206 | 2HD1 | ILEM | 11 | 2.123  | 7.445 | 1.024  | 1.00 | 0.00 |
| ATOM   | 207 | 3HD1 | ILEM | 11 | 1.922  | 6.530 | 2.541  | 1.00 | 0.00 |
| ATOM   | 208 | C    | ILEM | 11 | 3.110  | 3.721 | -1.021 | 1.00 | 0.00 |
| ATOM   | 209 | O    | ILEM | 11 | 2.808  | 2.698 | -0.387 | 1.00 | 0.00 |
| ATOM   | 210 | N    | PIPO | 12 | 3.748  | 3.665 | -2.175 | 1.00 | 0.00 |
| ATOM   | 211 | CE   | PIPO | 12 | 4.142  | 2.414 | -2.788 | 1.00 | 0.00 |
| ATOM   | 212 | CA   | PIPO | 12 | 4.123  | 4.857 | -2.920 | 1.00 | 0.00 |
| ATOM   | 213 | HA   | PIPO | 12 | 4.622  | 5.588 | -2.283 | 1.00 | 0.00 |
| ATOM   | 214 | CB   | PIPO | 12 | 5.085  | 4.526 | -4.076 | 1.00 | 0.00 |
| ATOM   | 215 | 2HB  | PIPO | 12 | 5.343  | 5.442 | -4.608 | 1.00 | 0.00 |
| ATOM   | 216 | 3HB  | PIPO | 12 | 5.991  | 4.073 | -3.676 | 1.00 | 0.00 |
| ATOM   | 217 | QB   | PIPO | 12 | 5.667  | 4.757 | -4.142 | 1.00 | 0.00 |
| ATOM   | 218 | CG   | PIPO | 12 | 4.405  | 3.543 | -5.046 | 1.00 | 0.00 |
| ATOM   | 219 | 2HG  | PIPO | 12 | 5.086  | 3.308 | -5.863 | 1.00 | 0.00 |
| ATOM   | 220 | 3HG  | PIPO | 12 | 3.498  | 3.996 | -5.447 | 1.00 | 0.00 |
| ATOM   | 221 | QG   | PIPO | 12 | 4.292  | 3.652 | -5.655 | 1.00 | 0.00 |
| ATOM   | 222 | CD   | PIPO | 12 | 4.010  | 2.527 | -4.318 | 1.00 | 0.00 |
| ATOM   | 223 | 2HD  | PIPO | 12 | 4.306  | 1.584 | -4.778 | 1.00 | 0.00 |
| ATOM   | 224 | 3HD  | PIPO | 12 | 2.975  | 2.748 | -4.578 | 1.00 | 0.00 |
| ATOM   | 225 | QD   | PIPO | 12 | 3.640  | 2.166 | -4.678 | 1.00 | 0.00 |
| ATOM   | 226 | 1HE  | PIPO | 12 | 5.176  | 2.192 | -2.529 | 1.00 | 0.00 |
| ATOM   | 227 | 2HE  | PIPO | 12 | 3.497  | 1.614 | -2.426 | 1.00 | 0.00 |
| ATOM   | 228 | QE   | PIPO | 12 | 4.336  | 1.903 | -2.477 | 1.00 | 0.00 |
| ATOM   | 229 | C    | PIPO | 12 | 2.895  | 5.551 | -3.535 | 1.00 | 0.00 |
| ATOM   | 230 | O    | PIPO | 12 | 2.723  | 6.751 | -3.286 | 1.00 | 0.00 |
| ATOM   | 231 | O1'  | PHEO | 13 | 2.069  | 4.871 | -4.307 | 1.00 | 0.00 |
| ATOM   | 232 | CA   | PHEO | 13 | 0.661  | 5.232 | -4.442 | 1.00 | 0.00 |
| ATOM   | 233 | HA   | PHEO | 13 | 0.561  | 6.134 | -5.075 | 1.00 | 0.00 |
| ATOM   | 234 | CB   | PHEO | 13 | 0.072  | 5.508 | -3.025 | 1.00 | 0.00 |
| ATOM   | 235 | 2HB  | PHEO | 13 | 0.886  | 5.828 | -2.345 | 1.00 | 0.00 |
| ATOM   | 236 | QB   | PHEO | 13 | 0.886  | 5.828 | -2.345 | 1.00 | 0.00 |
| ATOM   | 237 | QD   | PHEO | 13 | -1.198 | 6.646 | -2.959 | 1.00 | 0.00 |
| ATOM   | 238 | QE   | PHEO | 13 | -3.074 | 8.239 | -2.920 | 1.00 | 0.00 |
| ATOM   | 239 | QR   | PHEO | 13 | -2.513 | 7.762 | -2.932 | 1.00 | 0.00 |
| ATOM   | 240 | CG   | PHEO | 13 | -1.060 | 6.543 | -2.945 | 1.00 | 0.00 |
| ATOM   | 241 | CD1  | PHEO | 13 | -2.257 | 6.211 | -2.301 | 1.00 | 0.00 |
| ATOM   | 242 | 1HD  | PHEO | 13 | -2.377 | 5.236 | -1.846 | 1.00 | 0.00 |
| ATOM   | 243 | CE1  | PHEO | 13 | -3.320 | 7.106 | -2.289 | 1.00 | 0.00 |
| ATOM   | 244 | 1HE  | PHEO | 13 | -4.251 | 6.827 | -1.815 | 1.00 | 0.00 |
| ATOM   | 245 | CZ   | PHEO | 13 | -3.189 | 8.348 | -2.906 | 1.00 | 0.00 |
| ATOM   | 246 | HZ   | PHEO | 13 | -4.019 | 9.040 | -2.901 | 1.00 | 0.00 |
| ATOM   | 247 | CE2  | PHEO | 13 | -1.997 | 8.691 | -3.540 | 1.00 | 0.00 |
| ATOM   | 248 | 2HE  | PHEO | 13 | -1.897 | 9.652 | -4.024 | 1.00 | 0.00 |
| ATOM   | 249 | CD2  | PHEO | 13 | -0.934 | 7.792 | -3.561 | 1.00 | 0.00 |
| ATOM   | 250 | 2HD  | PHEO | 13 | -0.020 | 8.056 | -4.072 | 1.00 | 0.00 |
| ATOM   | 251 | C    | PHEO | 13 | -0.129 | 4.108 | -5.067 | 1.00 | 0.00 |
| ATOM   | 252 | O    | PHEO | 13 | -0.175 | 3.936 | -6.317 | 1.00 | 0.00 |
| TER    |     |      |      |    |        |       |        |      |      |
| ENDMDL |     |      |      |    |        |       |        |      |      |
| MODEL  | 13  |      |      |    |        |       |        |      |      |
| ATOM   | 1   | N    | VALM | 1  | -0.644 | 3.348 | -4.548 | 1.00 | 0.00 |
| ATOM   | 2   | QB   | VALM | 1  | -2.361 | 4.013 | -4.632 | 1.00 | 0.00 |
| ATOM   | 3   | CN   | VALM | 1  | -2.022 | 3.882 | -4.616 | 1.00 | 0.00 |
| ATOM   | 4   | 1HNB | VALM | 1  | -2.663 | 3.170 | -5.137 | 1.00 | 0.00 |
| ATOM   | 5   | 2HNB | VALM | 1  | -2.401 | 4.039 | -3.606 | 1.00 | 0.00 |

|      |    |      |      |   |        |        |        |      |      |
|------|----|------|------|---|--------|--------|--------|------|------|
| ATOM | 6  | 3HNB | VALM | 1 | -2.019 | 4.830  | -5.154 | 1.00 | 0.00 |
| ATOM | 7  | CA   | VALM | 1 | -0.374 | 1.920  | -4.401 | 1.00 | 0.00 |
| ATOM | 8  | HA   | VALM | 1 | -1.318 | 1.403  | -4.152 | 1.00 | 0.00 |
| ATOM | 9  | CB   | VALM | 1 | 0.198  | 1.340  | -5.756 | 1.00 | 0.00 |
| ATOM | 10 | HB   | VALM | 1 | 1.048  | 1.990  | -6.057 | 1.00 | 0.00 |
| ATOM | 11 | QG1  | VALM | 1 | 0.909  | -0.502 | -5.689 | 1.00 | 0.00 |
| ATOM | 12 | QG2  | VALM | 1 | -1.094 | 1.361  | -7.232 | 1.00 | 0.00 |
| ATOM | 13 | CG1  | VALM | 1 | 0.750  | -0.111 | -5.706 | 1.00 | 0.00 |
| ATOM | 14 | 1HG1 | VALM | 1 | 0.015  | -0.856 | -6.066 | 1.00 | 0.00 |
| ATOM | 15 | 2HG1 | VALM | 1 | 1.665  | -0.234 | -6.317 | 1.00 | 0.00 |
| ATOM | 16 | 3HG1 | VALM | 1 | 1.047  | -0.416 | -4.685 | 1.00 | 0.00 |
| ATOM | 17 | CG2  | VALM | 1 | -0.820 | 1.351  | -6.922 | 1.00 | 0.00 |
| ATOM | 18 | 1HG2 | VALM | 1 | -0.820 | 0.400  | -7.487 | 1.00 | 0.00 |
| ATOM | 19 | 2HG2 | VALM | 1 | -1.851 | 1.518  | -6.565 | 1.00 | 0.00 |
| ATOM | 20 | 3HG2 | VALM | 1 | -0.610 | 2.163  | -7.644 | 1.00 | 0.00 |
| ATOM | 21 | QQG  | VALM | 1 | -0.092 | 0.429  | -6.460 | 1.00 | 0.00 |
| ATOM | 22 | C    | VALM | 1 | 0.583  | 1.665  | -3.261 | 1.00 | 0.00 |
| ATOM | 23 | O    | VALM | 1 | 1.569  | 2.389  | -3.124 | 1.00 | 0.00 |
| ATOM | 24 | N    | PRO  | 2 | 0.275  | 0.621  | -2.447 | 1.00 | 0.00 |
| ATOM | 25 | CD   | PRO  | 2 | -0.883 | -0.258 | -2.579 | 1.00 | 0.00 |
| ATOM | 26 | CA   | PRO  | 2 | 1.121  | 0.279  | -1.316 | 1.00 | 0.00 |
| ATOM | 27 | HA   | PRO  | 2 | 1.417  | 1.107  | -0.840 | 1.00 | 0.00 |
| ATOM | 28 | CB   | PRO  | 2 | 0.255  | -0.600 | -0.428 | 1.00 | 0.00 |
| ATOM | 29 | 2HB  | PRO  | 2 | -0.131 | -0.037 | 0.422  | 1.00 | 0.00 |
| ATOM | 30 | QB   | PRO  | 2 | -0.131 | -0.037 | 0.422  | 1.00 | 0.00 |
| ATOM | 31 | CG   | PRO  | 2 | -0.877 | -1.097 | -1.312 | 1.00 | 0.00 |
| ATOM | 32 | 2HG  | PRO  | 2 | -1.832 | -1.013 | -0.793 | 1.00 | 0.00 |
| ATOM | 33 | QG   | PRO  | 2 | -1.832 | -1.013 | -0.793 | 1.00 | 0.00 |
| ATOM | 34 | 2HD  | PRO  | 2 | -1.807 | 0.315  | -2.670 | 1.00 | 0.00 |
| ATOM | 35 | QD   | PRO  | 2 | -1.807 | 0.315  | -2.670 | 1.00 | 0.00 |
| ATOM | 36 | C    | PRO  | 2 | 2.402  | -0.418 | -1.781 | 1.00 | 0.00 |
| ATOM | 37 | O    | PRO  | 2 | 2.450  | -0.964 | -2.881 | 1.00 | 0.00 |
| ATOM | 38 | N    | ILE  | 3 | 3.407  | -0.375 | -0.918 | 1.00 | 0.00 |
| ATOM | 39 | H    | ILE  | 3 | 3.358  | 0.072  | -0.024 | 1.00 | 0.00 |
| ATOM | 40 | CA   | ILE  | 3 | 4.684  | -0.995 | -1.226 | 1.00 | 0.00 |
| ATOM | 41 | HA   | ILE  | 3 | 4.695  | -1.206 | -2.295 | 1.00 | 0.00 |
| ATOM | 42 | CB   | ILE  | 3 | 5.833  | -0.024 | -0.945 | 1.00 | 0.00 |
| ATOM | 43 | HB   | ILE  | 3 | 6.529  | -0.507 | -0.259 | 1.00 | 0.00 |
| ATOM | 44 | QG2  | ILE  | 3 | 6.791  | 0.370  | -2.530 | 1.00 | 0.00 |
| ATOM | 45 | CG2  | ILE  | 3 | 6.607  | 0.294  | -2.225 | 1.00 | 0.00 |
| ATOM | 46 | 1HG2 | ILE  | 3 | 7.062  | 1.280  | -2.139 | 1.00 | 0.00 |
| ATOM | 47 | 2HG2 | ILE  | 3 | 7.386  | -0.453 | -2.374 | 1.00 | 0.00 |
| ATOM | 48 | 3HG2 | ILE  | 3 | 5.925  | 0.282  | -3.076 | 1.00 | 0.00 |
| ATOM | 49 | CG1  | ILE  | 3 | 5.324  | 1.242  | -0.253 | 1.00 | 0.00 |
| ATOM | 50 | 2HG1 | ILE  | 3 | 4.371  | 1.542  | -0.690 | 1.00 | 0.00 |
| ATOM | 51 | QG1  | ILE  | 3 | 4.371  | 1.542  | -0.690 | 1.00 | 0.00 |
| ATOM | 52 | QD1  | ILE  | 3 | 5.112  | 0.961  | 1.607  | 1.00 | 0.00 |
| ATOM | 53 | CD1  | ILE  | 3 | 5.152  | 1.015  | 1.250  | 1.00 | 0.00 |
| ATOM | 54 | 1HD1 | ILE  | 3 | 5.652  | 1.814  | 1.797  | 1.00 | 0.00 |
| ATOM | 55 | 2HD1 | ILE  | 3 | 4.091  | 1.012  | 1.499  | 1.00 | 0.00 |
| ATOM | 56 | 3HD1 | ILE  | 3 | 5.592  | 0.056  | 1.525  | 1.00 | 0.00 |
| ATOM | 57 | C    | ILE  | 3 | 4.799  | -2.320 | -0.468 | 1.00 | 0.00 |
| ATOM | 58 | O    | ILE  | 3 | 5.292  | -3.342 | -0.967 | 1.00 | 0.00 |
| ATOM | 59 | N    | PIP  | 4 | 4.333  | -2.298 | 0.766  | 1.00 | 0.00 |
| ATOM | 60 | CE   | PIP  | 4 | 3.756  | -1.111 | 1.359  | 1.00 | 0.00 |
| ATOM | 61 | CA   | PIP  | 4 | 4.376  | -3.462 | 1.638  | 1.00 | 0.00 |
| ATOM | 62 | HA   | PIP  | 4 | 5.364  | -3.919 | 1.649  | 1.00 | 0.00 |
| ATOM | 63 | CB   | PIP  | 4 | 4.027  | -3.094 | 3.093  | 1.00 | 0.00 |
| ATOM | 64 | 2HB  | PIP  | 4 | 4.070  | -3.989 | 3.713  | 1.00 | 0.00 |

|      |     |      |      |   |        |        |        |      |      |
|------|-----|------|------|---|--------|--------|--------|------|------|
| ATOM | 65  | 3HB  | PIP  | 4 | 4.742  | -2.361 | 3.464  | 1.00 | 0.00 |
| ATOM | 66  | QB   | PIP  | 4 | 4.406  | -3.175 | 3.589  | 1.00 | 0.00 |
| ATOM | 67  | CG   | PIP  | 4 | 2.607  | -2.500 | 3.146  | 1.00 | 0.00 |
| ATOM | 68  | 2HG  | PIP  | 4 | 2.360  | -2.240 | 4.175  | 1.00 | 0.00 |
| ATOM | 69  | 3HG  | PIP  | 4 | 1.891  | -3.234 | 2.775  | 1.00 | 0.00 |
| ATOM | 70  | QG   | PIP  | 4 | 2.126  | -2.737 | 3.475  | 1.00 | 0.00 |
| ATOM | 71  | CD   | PIP  | 4 | 2.592  | -1.513 | 2.284  | 1.00 | 0.00 |
| ATOM | 72  | 2HD  | PIP  | 4 | 2.158  | -0.619 | 2.732  | 1.00 | 0.00 |
| ATOM | 73  | 3HD  | PIP  | 4 | 1.831  | -2.035 | 1.705  | 1.00 | 0.00 |
| ATOM | 74  | QD   | PIP  | 4 | 1.995  | -1.327 | 2.218  | 1.00 | 0.00 |
| ATOM | 75  | 1HE  | PIP  | 4 | 4.516  | -0.589 | 1.939  | 1.00 | 0.00 |
| ATOM | 76  | 2HE  | PIP  | 4 | 3.385  | -0.455 | 0.573  | 1.00 | 0.00 |
| ATOM | 77  | QE   | PIP  | 4 | 3.951  | -0.522 | 1.256  | 1.00 | 0.00 |
| ATOM | 78  | C    | PIP  | 4 | 3.379  | -4.544 | 1.190  | 1.00 | 0.00 |
| ATOM | 79  | O    | PIP  | 4 | 2.715  | -4.270 | 0.191  | 1.00 | 0.00 |
| ATOM | 80  | N    | ALA  | 5 | 3.285  | -5.680 | 1.864  | 1.00 | 0.00 |
| ATOM | 81  | H    | ALA  | 5 | 3.828  | -5.895 | 2.676  | 1.00 | 0.00 |
| ATOM | 82  | CA   | ALA  | 5 | 2.357  | -6.719 | 1.454  | 1.00 | 0.00 |
| ATOM | 83  | HA   | ALA  | 5 | 2.776  | -7.211 | 0.576  | 1.00 | 0.00 |
| ATOM | 84  | QB   | ALA  | 5 | 2.182  | -7.996 | 2.842  | 1.00 | 0.00 |
| ATOM | 85  | CB   | ALA  | 5 | 2.216  | -7.750 | 2.575  | 1.00 | 0.00 |
| ATOM | 86  | 1HB  | ALA  | 5 | 1.209  | -8.169 | 2.560  | 1.00 | 0.00 |
| ATOM | 87  | 2HB  | ALA  | 5 | 2.943  | -8.549 | 2.429  | 1.00 | 0.00 |
| ATOM | 88  | 3HB  | ALA  | 5 | 2.395  | -7.269 | 3.536  | 1.00 | 0.00 |
| ATOM | 89  | C    | ALA  | 5 | 1.018  | -6.082 | 1.076  | 1.00 | 0.00 |
| ATOM | 90  | O    | ALA  | 5 | 0.667  | -5.018 | 1.585  | 1.00 | 0.00 |
| ATOM | 91  | N    | PRO  | 6 | 0.288  | -6.776 | 0.163  | 1.00 | 0.00 |
| ATOM | 92  | CD   | PRO  | 6 | 0.672  | -8.039 | -0.462 | 1.00 | 0.00 |
| ATOM | 93  | CA   | PRO  | 6 | -1.004 | -6.290 | -0.289 | 1.00 | 0.00 |
| ATOM | 94  | HA   | PRO  | 6 | -0.968 | -5.302 | -0.445 | 1.00 | 0.00 |
| ATOM | 95  | CB   | PRO  | 6 | -1.286 | -7.053 | -1.572 | 1.00 | 0.00 |
| ATOM | 96  | 2HB  | PRO  | 6 | -1.089 | -6.434 | -2.447 | 1.00 | 0.00 |
| ATOM | 97  | QB   | PRO  | 6 | -1.089 | -6.434 | -2.447 | 1.00 | 0.00 |
| ATOM | 98  | CG   | PRO  | 6 | -0.369 | -8.266 | -1.546 | 1.00 | 0.00 |
| ATOM | 99  | 2HG  | PRO  | 6 | 0.111  | -8.403 | -2.515 | 1.00 | 0.00 |
| ATOM | 100 | QG   | PRO  | 6 | 0.111  | -8.403 | -2.515 | 1.00 | 0.00 |
| ATOM | 101 | 2HD  | PRO  | 6 | 1.676  | -7.983 | -0.883 | 1.00 | 0.00 |
| ATOM | 102 | QD   | PRO  | 6 | 1.676  | -7.983 | -0.883 | 1.00 | 0.00 |
| ATOM | 103 | C    | PRO  | 6 | -2.076 | -6.504 | 0.782  | 1.00 | 0.00 |
| ATOM | 104 | O    | PRO  | 6 | -2.369 | -7.620 | 1.228  | 1.00 | 0.00 |
| ATOM | 105 | N    | THRM | 7 | -2.673 | -5.405 | 1.202  | 1.00 | 0.00 |
| ATOM | 106 | QB   | THRM | 7 | -3.970 | -5.631 | 2.493  | 1.00 | 0.00 |
| ATOM | 107 | CN   | THRM | 7 | -3.714 | -5.587 | 2.238  | 1.00 | 0.00 |
| ATOM | 108 | 1HNB | THRM | 7 | -3.805 | -6.646 | 2.480  | 1.00 | 0.00 |
| ATOM | 109 | 2HNB | THRM | 7 | -3.436 | -5.032 | 3.134  | 1.00 | 0.00 |
| ATOM | 110 | 3HNB | THRM | 7 | -4.669 | -5.216 | 1.864  | 1.00 | 0.00 |
| ATOM | 111 | CA   | THRM | 7 | -2.328 | -4.087 | 0.675  | 1.00 | 0.00 |
| ATOM | 112 | HA   | THRM | 7 | -1.231 | -4.042 | 0.542  | 1.00 | 0.00 |
| ATOM | 113 | CB   | THRM | 7 | -3.014 | -3.852 | -0.713 | 1.00 | 0.00 |
| ATOM | 114 | HB   | THRM | 7 | -3.499 | -2.853 | -0.698 | 1.00 | 0.00 |
| ATOM | 115 | QG2  | THRM | 7 | -1.846 | -3.944 | -2.285 | 1.00 | 0.00 |
| ATOM | 116 | OG1  | THRM | 7 | -4.010 | -4.838 | -0.948 | 1.00 | 0.00 |
| ATOM | 117 | 1HG  | THRM | 7 | -4.791 | -4.362 | -1.250 | 1.00 | 0.00 |
| ATOM | 118 | CG2  | THRM | 7 | -2.096 | -3.927 | -1.951 | 1.00 | 0.00 |
| ATOM | 119 | 1HG2 | THRM | 7 | -2.193 | -3.035 | -2.597 | 1.00 | 0.00 |
| ATOM | 120 | 2HG2 | THRM | 7 | -1.024 | -3.985 | -1.681 | 1.00 | 0.00 |
| ATOM | 121 | 3HG2 | THRM | 7 | -2.321 | -4.811 | -2.578 | 1.00 | 0.00 |
| ATOM | 122 | C    | THRM | 7 | -2.708 | -2.998 | 1.650  | 1.00 | 0.00 |
| ATOM | 123 | O    | THRM | 7 | -3.559 | -3.225 | 2.509  | 1.00 | 0.00 |

|      |     |      |      |    |        |        |        |      |      |
|------|-----|------|------|----|--------|--------|--------|------|------|
| ATOM | 124 | N    | VAL  | 8  | -2.077 | -1.842 | 1.504  | 1.00 | 0.00 |
| ATOM | 125 | H    | VAL  | 8  | -1.387 | -1.666 | 0.803  | 1.00 | 0.00 |
| ATOM | 126 | CA   | VAL  | 8  | -2.360 | -0.720 | 2.382  | 1.00 | 0.00 |
| ATOM | 127 | HA   | VAL  | 8  | -3.362 | -0.862 | 2.787  | 1.00 | 0.00 |
| ATOM | 128 | CB   | VAL  | 8  | -1.374 | -0.710 | 3.553  | 1.00 | 0.00 |
| ATOM | 129 | HB   | VAL  | 8  | -1.154 | 0.328  | 3.796  | 1.00 | 0.00 |
| ATOM | 130 | QG1  | VAL  | 8  | -2.134 | -1.520 | 5.086  | 1.00 | 0.00 |
| ATOM | 131 | QG2  | VAL  | 8  | 0.253  | -1.554 | 3.076  | 1.00 | 0.00 |
| ATOM | 132 | CG1  | VAL  | 8  | -1.989 | -1.364 | 4.792  | 1.00 | 0.00 |
| ATOM | 133 | 1HG1 | VAL  | 8  | -1.297 | -2.106 | 5.192  | 1.00 | 0.00 |
| ATOM | 134 | 2HG1 | VAL  | 8  | -2.181 | -0.602 | 5.547  | 1.00 | 0.00 |
| ATOM | 135 | 3HG1 | VAL  | 8  | -2.925 | -1.851 | 4.520  | 1.00 | 0.00 |
| ATOM | 136 | CG2  | VAL  | 8  | -0.060 | -1.393 | 3.167  | 1.00 | 0.00 |
| ATOM | 137 | 1HG2 | VAL  | 8  | -0.217 | -2.468 | 3.092  | 1.00 | 0.00 |
| ATOM | 138 | 2HG2 | VAL  | 8  | 0.282  | -1.006 | 2.206  | 1.00 | 0.00 |
| ATOM | 139 | 3HG2 | VAL  | 8  | 0.693  | -1.187 | 3.929  | 1.00 | 0.00 |
| ATOM | 140 | QQG  | VAL  | 8  | -0.941 | -1.537 | 4.081  | 1.00 | 0.00 |
| ATOM | 141 | C    | VAL  | 8  | -2.336 | 0.577  | 1.570  | 1.00 | 0.00 |
| ATOM | 142 | O    | VAL  | 8  | -1.966 | 0.626  | 0.391  | 1.00 | 0.00 |
| ATOM | 143 | N    | THRM | 9  | -2.741 | 1.651  | 2.222  | 1.00 | 0.00 |
| ATOM | 144 | QB   | THRM | 9  | -3.255 | 1.388  | 3.973  | 1.00 | 0.00 |
| ATOM | 145 | CN   | THRM | 9  | -3.153 | 1.440  | 3.628  | 1.00 | 0.00 |
| ATOM | 146 | 1HNB | THRM | 9  | -3.043 | 0.386  | 3.884  | 1.00 | 0.00 |
| ATOM | 147 | 2HNB | THRM | 9  | -2.526 | 2.041  | 4.285  | 1.00 | 0.00 |
| ATOM | 148 | 3HNB | THRM | 9  | -4.195 | 1.736  | 3.749  | 1.00 | 0.00 |
| ATOM | 149 | CA   | THRM | 9  | -2.780 | 2.968  | 1.594  | 1.00 | 0.00 |
| ATOM | 150 | HA   | THRM | 9  | -2.516 | 2.853  | 0.527  | 1.00 | 0.00 |
| ATOM | 151 | CB   | THRM | 9  | -4.217 | 3.582  | 1.693  | 1.00 | 0.00 |
| ATOM | 152 | HB   | THRM | 9  | -4.341 | 4.020  | 2.707  | 1.00 | 0.00 |
| ATOM | 153 | QG2  | THRM | 9  | -4.670 | 4.954  | 0.367  | 1.00 | 0.00 |
| ATOM | 154 | OG1  | THRM | 9  | -5.204 | 2.575  | 1.510  | 1.00 | 0.00 |
| ATOM | 155 | 1HG  | THRM | 9  | -4.825 | 1.764  | 1.863  | 1.00 | 0.00 |
| ATOM | 156 | CG2  | THRM | 9  | -4.573 | 4.665  | 0.651  | 1.00 | 0.00 |
| ATOM | 157 | 1HG2 | THRM | 9  | -4.072 | 4.489  | -0.318 | 1.00 | 0.00 |
| ATOM | 158 | 2HG2 | THRM | 9  | -5.656 | 4.697  | 0.427  | 1.00 | 0.00 |
| ATOM | 159 | 3HG2 | THRM | 9  | -4.282 | 5.675  | 0.993  | 1.00 | 0.00 |
| ATOM | 160 | C    | THRM | 9  | -1.760 | 3.893  | 2.213  | 1.00 | 0.00 |
| ATOM | 161 | O    | THRM | 9  | -2.085 | 4.854  | 2.881  | 1.00 | 0.00 |
| ATOM | 162 | N    | VALM | 10 | -0.495 | 3.595  | 1.985  | 1.00 | 0.00 |
| ATOM | 163 | QB   | VALM | 10 | -0.191 | 2.100  | 0.950  | 1.00 | 0.00 |
| ATOM | 164 | CN   | VALM | 10 | -0.250 | 2.396  | 1.153  | 1.00 | 0.00 |
| ATOM | 165 | 1HNB | VALM | 10 | -0.884 | 2.433  | 0.267  | 1.00 | 0.00 |
| ATOM | 166 | 2HNB | VALM | 10 | 0.796  | 2.369  | 0.852  | 1.00 | 0.00 |
| ATOM | 167 | 3HNB | VALM | 10 | -0.485 | 1.500  | 1.730  | 1.00 | 0.00 |
| ATOM | 168 | CA   | VALM | 10 | 0.599  | 4.401  | 2.521  | 1.00 | 0.00 |
| ATOM | 169 | HA   | VALM | 10 | 0.263  | 5.452  | 2.594  | 1.00 | 0.00 |
| ATOM | 170 | CB   | VALM | 10 | 0.996  | 3.879  | 3.957  | 1.00 | 0.00 |
| ATOM | 171 | HB   | VALM | 10 | 1.963  | 3.342  | 3.855  | 1.00 | 0.00 |
| ATOM | 172 | QG1  | VALM | 10 | 1.273  | 5.250  | 5.353  | 1.00 | 0.00 |
| ATOM | 173 | QG2  | VALM | 10 | -0.285 | 2.605  | 4.725  | 1.00 | 0.00 |
| ATOM | 174 | CG1  | VALM | 10 | 1.207  | 4.962  | 5.052  | 1.00 | 0.00 |
| ATOM | 175 | 1HG1 | VALM | 10 | 0.501  | 5.808  | 4.951  | 1.00 | 0.00 |
| ATOM | 176 | 2HG1 | VALM | 10 | 1.088  | 4.555  | 6.074  | 1.00 | 0.00 |
| ATOM | 177 | 3HG1 | VALM | 10 | 2.229  | 5.387  | 5.033  | 1.00 | 0.00 |
| ATOM | 178 | CG2  | VALM | 10 | -0.018 | 2.879  | 4.564  | 1.00 | 0.00 |
| ATOM | 179 | 1HG2 | VALM | 10 | -0.879 | 3.388  | 5.036  | 1.00 | 0.00 |
| ATOM | 180 | 2HG2 | VALM | 10 | -0.424 | 2.190  | 3.801  | 1.00 | 0.00 |
| ATOM | 181 | 3HG2 | VALM | 10 | 0.449  | 2.238  | 5.337  | 1.00 | 0.00 |
| ATOM | 182 | QQG  | VALM | 10 | 0.494  | 3.928  | 5.039  | 1.00 | 0.00 |

|      |     |      |      |    |        |       |        |      |      |
|------|-----|------|------|----|--------|-------|--------|------|------|
| ATOM | 183 | C    | VALM | 10 | 1.790  | 4.382 | 1.593  | 1.00 | 0.00 |
| ATOM | 184 | O    | VALM | 10 | 2.826  | 3.764 | 1.869  | 1.00 | 0.00 |
| ATOM | 185 | N    | ILEM | 11 | 1.661  | 5.062 | 0.470  | 1.00 | 0.00 |
| ATOM | 186 | QB   | ILEM | 11 | 0.047  | 5.921 | 0.227  | 1.00 | 0.00 |
| ATOM | 187 | CN   | ILEM | 11 | 0.366  | 5.751 | 0.275  | 1.00 | 0.00 |
| ATOM | 188 | 1HNB | ILEM | 11 | -0.280 | 5.565 | 1.133  | 1.00 | 0.00 |
| ATOM | 189 | 2HNB | ILEM | 11 | 0.535  | 6.824 | 0.176  | 1.00 | 0.00 |
| ATOM | 190 | 3HNB | ILEM | 11 | -0.115 | 5.376 | -0.628 | 1.00 | 0.00 |
| ATOM | 191 | CA   | ILEM | 11 | 2.731  | 5.132 | -0.521 | 1.00 | 0.00 |
| ATOM | 192 | HA   | ILEM | 11 | 2.345  | 5.693 | -1.391 | 1.00 | 0.00 |
| ATOM | 193 | CB   | ILEM | 11 | 3.992  | 5.901 | 0.048  | 1.00 | 0.00 |
| ATOM | 194 | HB   | ILEM | 11 | 4.863  | 5.225 | -0.088 | 1.00 | 0.00 |
| ATOM | 195 | QG2  | ILEM | 11 | 4.383  | 7.574 | -0.945 | 1.00 | 0.00 |
| ATOM | 196 | CG2  | ILEM | 11 | 4.295  | 7.220 | -0.728 | 1.00 | 0.00 |
| ATOM | 197 | 1HG2 | ILEM | 11 | 5.247  | 7.171 | -1.287 | 1.00 | 0.00 |
| ATOM | 198 | 2HG2 | ILEM | 11 | 3.539  | 7.458 | -1.495 | 1.00 | 0.00 |
| ATOM | 199 | 3HG2 | ILEM | 11 | 4.364  | 8.094 | -0.052 | 1.00 | 0.00 |
| ATOM | 200 | CG1  | ILEM | 11 | 3.918  | 6.239 | 1.571  | 1.00 | 0.00 |
| ATOM | 201 | 2HG1 | ILEM | 11 | 4.795  | 6.849 | 1.858  | 1.00 | 0.00 |
| ATOM | 202 | QG1  | ILEM | 11 | 4.795  | 6.849 | 1.858  | 1.00 | 0.00 |
| ATOM | 203 | QD1  | ILEM | 11 | 2.349  | 7.249 | 2.149  | 1.00 | 0.00 |
| ATOM | 204 | CD1  | ILEM | 11 | 2.680  | 7.039 | 2.024  | 1.00 | 0.00 |
| ATOM | 205 | 1HD1 | ILEM | 11 | 2.019  | 6.427 | 2.663  | 1.00 | 0.00 |
| ATOM | 206 | 2HD1 | ILEM | 11 | 2.963  | 7.934 | 2.612  | 1.00 | 0.00 |
| ATOM | 207 | 3HD1 | ILEM | 11 | 2.066  | 7.385 | 1.173  | 1.00 | 0.00 |
| ATOM | 208 | C    | ILEM | 11 | 3.092  | 3.755 | -1.024 | 1.00 | 0.00 |
| ATOM | 209 | O    | ILEM | 11 | 2.794  | 2.727 | -0.398 | 1.00 | 0.00 |
| ATOM | 210 | N    | PIPO | 12 | 3.743  | 3.711 | -2.172 | 1.00 | 0.00 |
| ATOM | 211 | CE   | PIPO | 12 | 4.158  | 2.468 | -2.784 | 1.00 | 0.00 |
| ATOM | 212 | CA   | PIPO | 12 | 4.112  | 4.912 | -2.908 | 1.00 | 0.00 |
| ATOM | 213 | HA   | PIPO | 12 | 4.596  | 5.645 | -2.263 | 1.00 | 0.00 |
| ATOM | 214 | CB   | PIPO | 12 | 5.092  | 4.596 | -4.053 | 1.00 | 0.00 |
| ATOM | 215 | 2HB  | PIPO | 12 | 5.345  | 5.517 | -4.579 | 1.00 | 0.00 |
| ATOM | 216 | 3HB  | PIPO | 12 | 5.999  | 4.152 | -3.644 | 1.00 | 0.00 |
| ATOM | 217 | QB   | PIPO | 12 | 5.672  | 4.834 | -4.112 | 1.00 | 0.00 |
| ATOM | 218 | CG   | PIPO | 12 | 4.435  | 3.608 | -5.034 | 1.00 | 0.00 |
| ATOM | 219 | 2HG  | PIPO | 12 | 5.128  | 3.385 | -5.846 | 1.00 | 0.00 |
| ATOM | 220 | 3HG  | PIPO | 12 | 3.527  | 4.053 | -5.445 | 1.00 | 0.00 |
| ATOM | 221 | QG   | PIPO | 12 | 4.327  | 3.719 | -5.645 | 1.00 | 0.00 |
| ATOM | 222 | CD   | PIPO | 12 | 4.043  | 2.585 | -4.315 | 1.00 | 0.00 |
| ATOM | 223 | 2HD  | PIPO | 12 | 4.355  | 1.649 | -4.776 | 1.00 | 0.00 |
| ATOM | 224 | 3HD  | PIPO | 12 | 3.008  | 2.796 | -4.587 | 1.00 | 0.00 |
| ATOM | 225 | QD   | PIPO | 12 | 3.682  | 2.222 | -4.681 | 1.00 | 0.00 |
| ATOM | 226 | 1HE  | PIPO | 12 | 5.193  | 2.257 | -2.513 | 1.00 | 0.00 |
| ATOM | 227 | 2HE  | PIPO | 12 | 3.519  | 1.659 | -2.432 | 1.00 | 0.00 |
| ATOM | 228 | QE   | PIPO | 12 | 4.356  | 1.958 | -2.473 | 1.00 | 0.00 |
| ATOM | 229 | C    | PIPO | 12 | 2.884  | 5.594 | -3.533 | 1.00 | 0.00 |
| ATOM | 230 | O    | PIPO | 12 | 2.678  | 6.781 | -3.259 | 1.00 | 0.00 |
| ATOM | 231 | O1'  | PHEO | 13 | 2.093  | 4.915 | -4.343 | 1.00 | 0.00 |
| ATOM | 232 | CA   | PHEO | 13 | 0.658  | 5.177 | -4.421 | 1.00 | 0.00 |
| ATOM | 233 | HA   | PHEO | 13 | 0.471  | 6.087 | -5.020 | 1.00 | 0.00 |
| ATOM | 234 | CB   | PHEO | 13 | 0.100  | 5.363 | -2.978 | 1.00 | 0.00 |
| ATOM | 235 | 2HB  | PHEO | 13 | 0.885  | 5.101 | -2.243 | 1.00 | 0.00 |
| ATOM | 236 | QB   | PHEO | 13 | 0.885  | 5.101 | -2.243 | 1.00 | 0.00 |
| ATOM | 237 | QD   | PHEO | 13 | -0.523 | 6.910 | -2.611 | 1.00 | 0.00 |
| ATOM | 238 | QE   | PHEO | 13 | -1.491 | 9.121 | -2.127 | 1.00 | 0.00 |
| ATOM | 239 | QR   | PHEO | 13 | -1.201 | 8.459 | -2.272 | 1.00 | 0.00 |
| ATOM | 240 | CG   | PHEO | 13 | -0.442 | 6.758 | -2.630 | 1.00 | 0.00 |
| ATOM | 241 | CD1  | PHEO | 13 | -1.506 | 6.883 | -1.729 | 1.00 | 0.00 |

Supplementary Material for Organic & Biomolecular Chemistry  
 This journal is © The Royal Society of Chemistry 2006

|          |     |      |      |    |        |        |        |      |      |
|----------|-----|------|------|----|--------|--------|--------|------|------|
| ATOM     | 242 | 1HD  | PHEO | 13 | -1.932 | 6.002  | -1.267 | 1.00 | 0.00 |
| ATOM     | 243 | CE1  | PHEO | 13 | -2.060 | 8.130  | -1.465 | 1.00 | 0.00 |
| ATOM     | 244 | 1HE  | PHEO | 13 | -2.901 | 8.211  | -0.791 | 1.00 | 0.00 |
| ATOM     | 245 | CZ   | PHEO | 13 | -1.544 | 9.265  | -2.086 | 1.00 | 0.00 |
| ATOM     | 246 | HZ   | PHEO | 13 | -1.979 | 10.232 | -1.884 | 1.00 | 0.00 |
| ATOM     | 247 | CE2  | PHEO | 13 | -0.477 | 9.151  | -2.975 | 1.00 | 0.00 |
| ATOM     | 248 | 2HE  | PHEO | 13 | -0.081 | 10.031 | -3.462 | 1.00 | 0.00 |
| ATOM     | 249 | CD2  | PHEO | 13 | 0.073  | 7.901  | -3.248 | 1.00 | 0.00 |
| ATOM     | 250 | 2HD  | PHEO | 13 | 0.886  | 7.817  | -3.955 | 1.00 | 0.00 |
| ATOM     | 251 | C    | PHEO | 13 | -0.070 | 4.017  | -5.057 | 1.00 | 0.00 |
| ATOM     | 252 | O    | PHEO | 13 | -0.096 | 3.849  | -6.309 | 1.00 | 0.00 |
| TER      |     |      |      |    |        |        |        |      |      |
| ENDMDL   |     |      |      |    |        |        |        |      |      |
| MODEL 14 |     |      |      |    |        |        |        |      |      |
| ATOM     | 1   | N    | VALM | 1  | 0.040  | 3.274  | -5.003 | 1.00 | 0.00 |
| ATOM     | 2   | QB   | VALM | 1  | 1.054  | 3.291  | -6.543 | 1.00 | 0.00 |
| ATOM     | 3   | CN   | VALM | 1  | 0.854  | 3.288  | -6.239 | 1.00 | 0.00 |
| ATOM     | 4   | 1HNB | VALM | 1  | 0.733  | 2.341  | -6.765 | 1.00 | 0.00 |
| ATOM     | 5   | 2HNB | VALM | 1  | 0.526  | 4.105  | -6.883 | 1.00 | 0.00 |
| ATOM     | 6   | 3HNB | VALM | 1  | 1.904  | 3.428  | -5.982 | 1.00 | 0.00 |
| ATOM     | 7   | CA   | VALM | 1  | -0.326 | 2.029  | -4.333 | 1.00 | 0.00 |
| ATOM     | 8   | HA   | VALM | 1  | -1.332 | 2.146  | -3.891 | 1.00 | 0.00 |
| ATOM     | 9   | CB   | VALM | 1  | -0.351 | 0.845  | -5.379 | 1.00 | 0.00 |
| ATOM     | 10  | HB   | VALM | 1  | -0.231 | 1.294  | -6.387 | 1.00 | 0.00 |
| ATOM     | 11  | QG1  | VALM | 1  | 1.069  | -0.519 | -5.205 | 1.00 | 0.00 |
| ATOM     | 12  | QG2  | VALM | 1  | -2.029 | -0.171 | -5.387 | 1.00 | 0.00 |
| ATOM     | 13  | CG1  | VALM | 1  | 0.770  | -0.223 | -5.237 | 1.00 | 0.00 |
| ATOM     | 14  | 1HG1 | VALM | 1  | 1.563  | 0.088  | -4.531 | 1.00 | 0.00 |
| ATOM     | 15  | 2HG1 | VALM | 1  | 0.380  | -1.196 | -4.882 | 1.00 | 0.00 |
| ATOM     | 16  | 3HG1 | VALM | 1  | 1.262  | -0.449 | -6.202 | 1.00 | 0.00 |
| ATOM     | 17  | CG2  | VALM | 1  | -1.676 | 0.046  | -5.391 | 1.00 | 0.00 |
| ATOM     | 18  | 1HG2 | VALM | 1  | -2.258 | 0.213  | -6.316 | 1.00 | 0.00 |
| ATOM     | 19  | 2HG2 | VALM | 1  | -1.501 | -1.043 | -5.308 | 1.00 | 0.00 |
| ATOM     | 20  | 3HG2 | VALM | 1  | -2.327 | 0.316  | -4.538 | 1.00 | 0.00 |
| ATOM     | 21  | QQG  | VALM | 1  | -0.480 | -0.345 | -5.296 | 1.00 | 0.00 |
| ATOM     | 22  | C    | VALM | 1  | 0.623  | 1.726  | -3.198 | 1.00 | 0.00 |
| ATOM     | 23  | O    | VALM | 1  | 1.624  | 2.424  | -3.044 | 1.00 | 0.00 |
| ATOM     | 24  | N    | PRO  | 2  | 0.288  | 0.672  | -2.409 | 1.00 | 0.00 |
| ATOM     | 25  | CD   | PRO  | 2  | -0.889 | -0.177 | -2.562 | 1.00 | 0.00 |
| ATOM     | 26  | CA   | PRO  | 2  | 1.124  | 0.283  | -1.285 | 1.00 | 0.00 |
| ATOM     | 27  | HA   | PRO  | 2  | 1.439  | 1.094  | -0.791 | 1.00 | 0.00 |
| ATOM     | 28  | CB   | PRO  | 2  | 0.238  | -0.596 | -0.419 | 1.00 | 0.00 |
| ATOM     | 29  | 2HB  | PRO  | 2  | -0.137 | -0.044 | 0.443  | 1.00 | 0.00 |
| ATOM     | 30  | QB   | PRO  | 2  | -0.137 | -0.044 | 0.443  | 1.00 | 0.00 |
| ATOM     | 31  | CG   | PRO  | 2  | -0.905 | -1.046 | -1.316 | 1.00 | 0.00 |
| ATOM     | 32  | 2HG  | PRO  | 2  | -1.858 | -0.952 | -0.795 | 1.00 | 0.00 |
| ATOM     | 33  | QG   | PRO  | 2  | -1.858 | -0.952 | -0.795 | 1.00 | 0.00 |
| ATOM     | 34  | 2HD  | PRO  | 2  | -1.799 | 0.417  | -2.641 | 1.00 | 0.00 |
| ATOM     | 35  | QD   | PRO  | 2  | -1.799 | 0.417  | -2.641 | 1.00 | 0.00 |
| ATOM     | 36  | C    | PRO  | 2  | 2.390  | -0.432 | -1.764 | 1.00 | 0.00 |
| ATOM     | 37  | O    | PRO  | 2  | 2.407  | -1.010 | -2.850 | 1.00 | 0.00 |
| ATOM     | 38  | N    | ILE  | 3  | 3.419  | -0.369 | -0.932 | 1.00 | 0.00 |
| ATOM     | 39  | H    | ILE  | 3  | 3.396  | 0.104  | -0.051 | 1.00 | 0.00 |
| ATOM     | 40  | CA   | ILE  | 3  | 4.685  | -1.003 | -1.257 | 1.00 | 0.00 |
| ATOM     | 41  | HA   | ILE  | 3  | 4.674  | -1.226 | -2.324 | 1.00 | 0.00 |
| ATOM     | 42  | CB   | ILE  | 3  | 5.847  | -0.039 | -1.007 | 1.00 | 0.00 |
| ATOM     | 43  | HB   | ILE  | 3  | 6.560  | -0.528 | -0.345 | 1.00 | 0.00 |
| ATOM     | 44  | QG2  | ILE  | 3  | 6.760  | 0.354  | -2.619 | 1.00 | 0.00 |
| ATOM     | 45  | CG2  | ILE  | 3  | 6.585  | 0.279  | -2.310 | 1.00 | 0.00 |



|      |     |      |     |   |        |        |        |      |      |
|------|-----|------|-----|---|--------|--------|--------|------|------|
| ATOM | 46  | 1HG2 | ILE | 3 | 7.461  | -0.363 | -2.395 | 1.00 | 0.00 |
| ATOM | 47  | 2HG2 | ILE | 3 | 5.920  | 0.103  | -3.157 | 1.00 | 0.00 |
| ATOM | 48  | 3HG2 | ILE | 3 | 6.897  | 1.323  | -2.305 | 1.00 | 0.00 |
| ATOM | 49  | CG1  | ILE | 3 | 5.365  | 1.229  | -0.299 | 1.00 | 0.00 |
| ATOM | 50  | 2HG1 | ILE | 3 | 4.414  | 1.549  | -0.725 | 1.00 | 0.00 |
| ATOM | 51  | QG1  | ILE | 3 | 4.414  | 1.549  | -0.725 | 1.00 | 0.00 |
| ATOM | 52  | QD1  | ILE | 3 | 5.162  | 0.931  | 1.560  | 1.00 | 0.00 |
| ATOM | 53  | CD1  | ILE | 3 | 5.201  | 0.987  | 1.204  | 1.00 | 0.00 |
| ATOM | 54  | 1HD1 | ILE | 3 | 5.614  | 0.013  | 1.463  | 1.00 | 0.00 |
| ATOM | 55  | 2HD1 | ILE | 3 | 5.729  | 1.765  | 1.756  | 1.00 | 0.00 |
| ATOM | 56  | 3HD1 | ILE | 3 | 4.142  | 1.014  | 1.462  | 1.00 | 0.00 |
| ATOM | 57  | C    | ILE | 3 | 4.803  | -2.319 | -0.488 | 1.00 | 0.00 |
| ATOM | 58  | O    | ILE | 3 | 5.306  | -3.343 | -0.974 | 1.00 | 0.00 |
| ATOM | 59  | N    | PIP | 4 | 4.327  | -2.291 | 0.743  | 1.00 | 0.00 |
| ATOM | 60  | CE   | PIP | 4 | 3.738  | -1.104 | 1.323  | 1.00 | 0.00 |
| ATOM | 61  | CA   | PIP | 4 | 4.371  | -3.448 | 1.625  | 1.00 | 0.00 |
| ATOM | 62  | HA   | PIP | 4 | 5.363  | -3.899 | 1.647  | 1.00 | 0.00 |
| ATOM | 63  | CB   | PIP | 4 | 4.009  | -3.072 | 3.073  | 1.00 | 0.00 |
| ATOM | 64  | 2HB  | PIP | 4 | 4.053  | -3.961 | 3.702  | 1.00 | 0.00 |
| ATOM | 65  | 3HB  | PIP | 4 | 4.716  | -2.330 | 3.445  | 1.00 | 0.00 |
| ATOM | 66  | QB   | PIP | 4 | 4.384  | -3.145 | 3.574  | 1.00 | 0.00 |
| ATOM | 67  | CG   | PIP | 4 | 2.586  | -2.486 | 3.112  | 1.00 | 0.00 |
| ATOM | 68  | 2HG  | PIP | 4 | 2.328  | -2.219 | 4.137  | 1.00 | 0.00 |
| ATOM | 69  | 3HG  | PIP | 4 | 1.877  | -3.227 | 2.741  | 1.00 | 0.00 |
| ATOM | 70  | QG   | PIP | 4 | 2.102  | -2.723 | 3.439  | 1.00 | 0.00 |
| ATOM | 71  | CD   | PIP | 4 | 2.570  | -1.506 | 2.242  | 1.00 | 0.00 |
| ATOM | 72  | 2HD  | PIP | 4 | 2.126  | -0.611 | 2.678  | 1.00 | 0.00 |
| ATOM | 73  | 3HD  | PIP | 4 | 1.816  | -2.038 | 1.661  | 1.00 | 0.00 |
| ATOM | 74  | QD   | PIP | 4 | 1.971  | -1.325 | 2.170  | 1.00 | 0.00 |
| ATOM | 75  | 1HE  | PIP | 4 | 4.491  | -0.571 | 1.904  | 1.00 | 0.00 |
| ATOM | 76  | 2HE  | PIP | 4 | 3.368  | -0.457 | 0.527  | 1.00 | 0.00 |
| ATOM | 77  | QE   | PIP | 4 | 3.929  | -0.514 | 1.216  | 1.00 | 0.00 |
| ATOM | 78  | C    | PIP | 4 | 3.385  | -4.540 | 1.178  | 1.00 | 0.00 |
| ATOM | 79  | O    | PIP | 4 | 2.763  | -4.299 | 0.145  | 1.00 | 0.00 |
| ATOM | 80  | N    | ALA | 5 | 3.258  | -5.651 | 1.889  | 1.00 | 0.00 |
| ATOM | 81  | H    | ALA | 5 | 3.768  | -5.838 | 2.728  | 1.00 | 0.00 |
| ATOM | 82  | CA   | ALA | 5 | 2.340  | -6.700 | 1.480  | 1.00 | 0.00 |
| ATOM | 83  | HA   | ALA | 5 | 2.769  | -7.197 | 0.611  | 1.00 | 0.00 |
| ATOM | 84  | QB   | ALA | 5 | 2.161  | -7.964 | 2.879  | 1.00 | 0.00 |
| ATOM | 85  | CB   | ALA | 5 | 2.195  | -7.721 | 2.611  | 1.00 | 0.00 |
| ATOM | 86  | 1HB  | ALA | 5 | 2.745  | -7.375 | 3.486  | 1.00 | 0.00 |
| ATOM | 87  | 2HB  | ALA | 5 | 1.141  | -7.836 | 2.865  | 1.00 | 0.00 |
| ATOM | 88  | 3HB  | ALA | 5 | 2.597  | -8.680 | 2.287  | 1.00 | 0.00 |
| ATOM | 89  | C    | ALA | 5 | 1.000  | -6.074 | 1.087  | 1.00 | 0.00 |
| ATOM | 90  | O    | ALA | 5 | 0.642  | -5.004 | 1.576  | 1.00 | 0.00 |
| ATOM | 91  | N    | PRO | 6 | 0.276  | -6.786 | 0.182  | 1.00 | 0.00 |
| ATOM | 92  | CD   | PRO | 6 | 0.669  | -8.058 | -0.420 | 1.00 | 0.00 |
| ATOM | 93  | CA   | PRO | 6 | -1.015 | -6.312 | -0.284 | 1.00 | 0.00 |
| ATOM | 94  | HA   | PRO | 6 | -0.982 | -5.328 | -0.457 | 1.00 | 0.00 |
| ATOM | 95  | CB   | PRO | 6 | -1.288 | -7.099 | -1.555 | 1.00 | 0.00 |
| ATOM | 96  | 2HB  | PRO | 6 | -1.089 | -6.493 | -2.440 | 1.00 | 0.00 |
| ATOM | 97  | QB   | PRO | 6 | -1.089 | -6.493 | -2.440 | 1.00 | 0.00 |
| ATOM | 98  | CG   | PRO | 6 | -0.367 | -8.307 | -1.504 | 1.00 | 0.00 |
| ATOM | 99  | 2HG  | PRO | 6 | 0.118  | -8.459 | -2.468 | 1.00 | 0.00 |
| ATOM | 100 | QG   | PRO | 6 | 0.118  | -8.459 | -2.468 | 1.00 | 0.00 |
| ATOM | 101 | 2HD  | PRO | 6 | 1.674  | -8.005 | -0.837 | 1.00 | 0.00 |
| ATOM | 102 | QD   | PRO | 6 | 1.674  | -8.005 | -0.837 | 1.00 | 0.00 |
| ATOM | 103 | C    | PRO | 6 | -2.091 | -6.512 | 0.785  | 1.00 | 0.00 |
| ATOM | 104 | O    | PRO | 6 | -2.398 | -7.625 | 1.233  | 1.00 | 0.00 |

|      |     |      |      |    |        |        |        |      |      |
|------|-----|------|------|----|--------|--------|--------|------|------|
| ATOM | 105 | N    | THRM | 7  | -2.676 | -5.405 | 1.202  | 1.00 | 0.00 |
| ATOM | 106 | QB   | THRM | 7  | -3.977 | -5.615 | 2.492  | 1.00 | 0.00 |
| ATOM | 107 | CN   | THRM | 7  | -3.721 | -5.574 | 2.238  | 1.00 | 0.00 |
| ATOM | 108 | 1HNB | THRM | 7  | -3.825 | -6.631 | 2.481  | 1.00 | 0.00 |
| ATOM | 109 | 2HNB | THRM | 7  | -3.437 | -5.021 | 3.134  | 1.00 | 0.00 |
| ATOM | 110 | 3HNB | THRM | 7  | -4.670 | -5.193 | 1.861  | 1.00 | 0.00 |
| ATOM | 111 | CA   | THRM | 7  | -2.314 | -4.092 | 0.675  | 1.00 | 0.00 |
| ATOM | 112 | HA   | THRM | 7  | -1.215 | -4.055 | 0.558  | 1.00 | 0.00 |
| ATOM | 113 | CB   | THRM | 7  | -2.977 | -3.860 | -0.724 | 1.00 | 0.00 |
| ATOM | 114 | HB   | THRM | 7  | -3.458 | -2.858 | -0.721 | 1.00 | 0.00 |
| ATOM | 115 | QG2  | THRM | 7  | -1.789 | -3.965 | -2.279 | 1.00 | 0.00 |
| ATOM | 116 | OG1  | THRM | 7  | -3.977 | -4.841 | -0.969 | 1.00 | 0.00 |
| ATOM | 117 | 1HG  | THRM | 7  | -4.499 | -4.511 | -1.707 | 1.00 | 0.00 |
| ATOM | 118 | CG2  | THRM | 7  | -2.042 | -3.946 | -1.948 | 1.00 | 0.00 |
| ATOM | 119 | 1HG2 | THRM | 7  | -2.166 | -3.084 | -2.629 | 1.00 | 0.00 |
| ATOM | 120 | 2HG2 | THRM | 7  | -0.973 | -3.951 | -1.665 | 1.00 | 0.00 |
| ATOM | 121 | 3HG2 | THRM | 7  | -2.226 | -4.861 | -2.542 | 1.00 | 0.00 |
| ATOM | 122 | C    | THRM | 7  | -2.701 | -2.997 | 1.639  | 1.00 | 0.00 |
| ATOM | 123 | O    | THRM | 7  | -3.563 | -3.215 | 2.490  | 1.00 | 0.00 |
| ATOM | 124 | N    | VAL  | 8  | -2.066 | -1.843 | 1.492  | 1.00 | 0.00 |
| ATOM | 125 | H    | VAL  | 8  | -1.367 | -1.675 | 0.798  | 1.00 | 0.00 |
| ATOM | 126 | CA   | VAL  | 8  | -2.354 | -0.714 | 2.361  | 1.00 | 0.00 |
| ATOM | 127 | HA   | VAL  | 8  | -3.366 | -0.845 | 2.744  | 1.00 | 0.00 |
| ATOM | 128 | CB   | VAL  | 8  | -1.393 | -0.712 | 3.552  | 1.00 | 0.00 |
| ATOM | 129 | HB   | VAL  | 8  | -1.175 | 0.326  | 3.804  | 1.00 | 0.00 |
| ATOM | 130 | QG1  | VAL  | 8  | -2.188 | -1.525 | 5.066  | 1.00 | 0.00 |
| ATOM | 131 | QG2  | VAL  | 8  | 0.241  | -1.558 | 3.106  | 1.00 | 0.00 |
| ATOM | 132 | CG1  | VAL  | 8  | -2.035 | -1.369 | 4.776  | 1.00 | 0.00 |
| ATOM | 133 | 1HG1 | VAL  | 8  | -3.099 | -1.520 | 4.590  | 1.00 | 0.00 |
| ATOM | 134 | 2HG1 | VAL  | 8  | -1.559 | -2.331 | 4.964  | 1.00 | 0.00 |
| ATOM | 135 | 3HG1 | VAL  | 8  | -1.905 | -0.723 | 5.643  | 1.00 | 0.00 |
| ATOM | 136 | CG2  | VAL  | 8  | -0.073 | -1.396 | 3.192  | 1.00 | 0.00 |
| ATOM | 137 | 1HG2 | VAL  | 8  | 0.246  | -1.071 | 2.201  | 1.00 | 0.00 |
| ATOM | 138 | 2HG2 | VAL  | 8  | 0.687  | -1.126 | 3.925  | 1.00 | 0.00 |
| ATOM | 139 | 3HG2 | VAL  | 8  | -0.211 | -2.477 | 3.193  | 1.00 | 0.00 |
| ATOM | 140 | QQG  | VAL  | 8  | -0.973 | -1.541 | 4.086  | 1.00 | 0.00 |
| ATOM | 141 | C    | VAL  | 8  | -2.298 | 0.578  | 1.545  | 1.00 | 0.00 |
| ATOM | 142 | O    | VAL  | 8  | -1.893 | 0.621  | 0.377  | 1.00 | 0.00 |
| ATOM | 143 | N    | THRM | 9  | -2.718 | 1.657  | 2.179  | 1.00 | 0.00 |
| ATOM | 144 | QB   | THRM | 9  | -3.287 | 1.404  | 3.915  | 1.00 | 0.00 |
| ATOM | 145 | CN   | THRM | 9  | -3.175 | 1.454  | 3.573  | 1.00 | 0.00 |
| ATOM | 146 | 1HNB | THRM | 9  | -3.078 | 0.400  | 3.837  | 1.00 | 0.00 |
| ATOM | 147 | 2HNB | THRM | 9  | -2.564 | 2.055  | 4.247  | 1.00 | 0.00 |
| ATOM | 148 | 3HNB | THRM | 9  | -4.218 | 1.756  | 3.661  | 1.00 | 0.00 |
| ATOM | 149 | CA   | THRM | 9  | -2.731 | 2.972  | 1.546  | 1.00 | 0.00 |
| ATOM | 150 | HA   | THRM | 9  | -2.421 | 2.854  | 0.491  | 1.00 | 0.00 |
| ATOM | 151 | CB   | THRM | 9  | -4.171 | 3.585  | 1.581  | 1.00 | 0.00 |
| ATOM | 152 | HB   | THRM | 9  | -4.249 | 4.244  | 2.472  | 1.00 | 0.00 |
| ATOM | 153 | QG2  | THRM | 9  | -4.718 | 4.612  | 0.003  | 1.00 | 0.00 |
| ATOM | 154 | OG1  | THRM | 9  | -5.147 | 2.558  | 1.690  | 1.00 | 0.00 |
| ATOM | 155 | 1HG  | THRM | 9  | -4.954 | 1.929  | 0.988  | 1.00 | 0.00 |
| ATOM | 156 | CG2  | THRM | 9  | -4.601 | 4.396  | 0.339  | 1.00 | 0.00 |
| ATOM | 157 | 1HG2 | THRM | 9  | -4.245 | 3.937  | -0.601 | 1.00 | 0.00 |
| ATOM | 158 | 2HG2 | THRM | 9  | -5.699 | 4.468  | 0.240  | 1.00 | 0.00 |
| ATOM | 159 | 3HG2 | THRM | 9  | -4.208 | 5.431  | 0.369  | 1.00 | 0.00 |
| ATOM | 160 | C    | THRM | 9  | -1.739 | 3.900  | 2.205  | 1.00 | 0.00 |
| ATOM | 161 | O    | THRM | 9  | -2.093 | 4.844  | 2.883  | 1.00 | 0.00 |
| ATOM | 162 | N    | VALM | 10 | -0.465 | 3.625  | 2.001  | 1.00 | 0.00 |
| ATOM | 163 | QB   | VALM | 10 | -0.114 | 2.155  | 0.945  | 1.00 | 0.00 |

|      |     |      |      |    |        |       |        |      |      |
|------|-----|------|------|----|--------|-------|--------|------|------|
| ATOM | 164 | CN   | VALM | 10 | -0.183 | 2.445 | 1.154  | 1.00 | 0.00 |
| ATOM | 165 | 1HNB | VALM | 10 | 0.870  | 2.442 | 0.873  | 1.00 | 0.00 |
| ATOM | 166 | 2HNB | VALM | 10 | -0.414 | 1.536 | 1.708  | 1.00 | 0.00 |
| ATOM | 167 | 3HNB | VALM | 10 | -0.798 | 2.488 | 0.253  | 1.00 | 0.00 |
| ATOM | 168 | CA   | VALM | 10 | 0.604  | 4.438 | 2.576  | 1.00 | 0.00 |
| ATOM | 169 | HA   | VALM | 10 | 0.255  | 5.483 | 2.651  | 1.00 | 0.00 |
| ATOM | 170 | CB   | VALM | 10 | 0.966  | 3.903 | 4.019  | 1.00 | 0.00 |
| ATOM | 171 | HB   | VALM | 10 | 1.901  | 3.310 | 3.922  | 1.00 | 0.00 |
| ATOM | 172 | QG1  | VALM | 10 | 1.320  | 5.273 | 5.397  | 1.00 | 0.00 |
| ATOM | 173 | QG2  | VALM | 10 | -0.397 | 2.719 | 4.786  | 1.00 | 0.00 |
| ATOM | 174 | CG1  | VALM | 10 | 1.236  | 4.980 | 5.105  | 1.00 | 0.00 |
| ATOM | 175 | 1HG1 | VALM | 10 | 0.328  | 5.234 | 5.684  | 1.00 | 0.00 |
| ATOM | 176 | 2HG1 | VALM | 10 | 2.009  | 4.660 | 5.831  | 1.00 | 0.00 |
| ATOM | 177 | 3HG1 | VALM | 10 | 1.623  | 5.924 | 4.677  | 1.00 | 0.00 |
| ATOM | 178 | CG2  | VALM | 10 | -0.106 | 2.967 | 4.628  | 1.00 | 0.00 |
| ATOM | 179 | 1HG2 | VALM | 10 | 0.239  | 2.487 | 5.563  | 1.00 | 0.00 |
| ATOM | 180 | 2HG2 | VALM | 10 | -1.038 | 3.510 | 4.866  | 1.00 | 0.00 |
| ATOM | 181 | 3HG2 | VALM | 10 | -0.392 | 2.159 | 3.929  | 1.00 | 0.00 |
| ATOM | 182 | QQG  | VALM | 10 | 0.462  | 3.996 | 5.092  | 1.00 | 0.00 |
| ATOM | 183 | C    | VALM | 10 | 1.821  | 4.440 | 1.683  | 1.00 | 0.00 |
| ATOM | 184 | O    | VALM | 10 | 2.902  | 3.958 | 2.045  | 1.00 | 0.00 |
| ATOM | 185 | N    | ILEM | 11 | 1.665  | 4.989 | 0.493  | 1.00 | 0.00 |
| ATOM | 186 | QB   | ILEM | 11 | -0.014 | 5.656 | 0.125  | 1.00 | 0.00 |
| ATOM | 187 | CN   | ILEM | 11 | 0.317  | 5.524 | 0.198  | 1.00 | 0.00 |
| ATOM | 188 | 1HNB | ILEM | 11 | -0.335 | 5.363 | 1.056  | 1.00 | 0.00 |
| ATOM | 189 | 2HNB | ILEM | 11 | 0.387  | 6.592 | -0.008 | 1.00 | 0.00 |
| ATOM | 190 | 3HNB | ILEM | 11 | -0.096 | 5.013 | -0.672 | 1.00 | 0.00 |
| ATOM | 191 | CA   | ILEM | 11 | 2.755  | 5.062 | -0.476 | 1.00 | 0.00 |
| ATOM | 192 | HA   | ILEM | 11 | 2.394  | 5.648 | -1.341 | 1.00 | 0.00 |
| ATOM | 193 | CB   | ILEM | 11 | 4.017  | 5.799 | 0.133  | 1.00 | 0.00 |
| ATOM | 194 | HB   | ILEM | 11 | 3.856  | 5.852 | 1.230  | 1.00 | 0.00 |
| ATOM | 195 | QG2  | ILEM | 11 | 5.709  | 4.812 | -0.185 | 1.00 | 0.00 |
| ATOM | 196 | CG2  | ILEM | 11 | 5.347  | 5.020 | -0.110 | 1.00 | 0.00 |
| ATOM | 197 | 1HG2 | ILEM | 11 | 5.459  | 4.696 | -1.160 | 1.00 | 0.00 |
| ATOM | 198 | 2HG2 | ILEM | 11 | 6.248  | 5.628 | 0.085  | 1.00 | 0.00 |
| ATOM | 199 | 3HG2 | ILEM | 11 | 5.420  | 4.113 | 0.518  | 1.00 | 0.00 |
| ATOM | 200 | CG1  | ILEM | 11 | 4.216  | 7.267 | -0.364 | 1.00 | 0.00 |
| ATOM | 201 | 2HG1 | ILEM | 11 | 4.579  | 7.894 | 0.474  | 1.00 | 0.00 |
| ATOM | 202 | QG1  | ILEM | 11 | 4.579  | 7.894 | 0.474  | 1.00 | 0.00 |
| ATOM | 203 | QD1  | ILEM | 11 | 5.508  | 7.503 | -1.810 | 1.00 | 0.00 |
| ATOM | 204 | CD1  | ILEM | 11 | 5.234  | 7.459 | -1.506 | 1.00 | 0.00 |
| ATOM | 205 | 1HD1 | ILEM | 11 | 5.939  | 6.610 | -1.560 | 1.00 | 0.00 |
| ATOM | 206 | 2HD1 | ILEM | 11 | 4.736  | 7.531 | -2.492 | 1.00 | 0.00 |
| ATOM | 207 | 3HD1 | ILEM | 11 | 5.848  | 8.369 | -1.378 | 1.00 | 0.00 |
| ATOM | 208 | C    | ILEM | 11 | 3.105  | 3.691 | -1.002 | 1.00 | 0.00 |
| ATOM | 209 | O    | ILEM | 11 | 2.872  | 2.660 | -0.353 | 1.00 | 0.00 |
| ATOM | 210 | N    | PIPO | 12 | 3.674  | 3.656 | -2.192 | 1.00 | 0.00 |
| ATOM | 211 | CE   | PIPO | 12 | 4.068  | 2.417 | -2.829 | 1.00 | 0.00 |
| ATOM | 212 | CA   | PIPO | 12 | 3.968  | 4.859 | -2.954 | 1.00 | 0.00 |
| ATOM | 213 | HA   | PIPO | 12 | 4.482  | 5.605 | -2.347 | 1.00 | 0.00 |
| ATOM | 214 | CB   | PIPO | 12 | 4.869  | 4.558 | -4.166 | 1.00 | 0.00 |
| ATOM | 215 | 2HB  | PIPO | 12 | 5.067  | 5.482 | -4.711 | 1.00 | 0.00 |
| ATOM | 216 | 3HB  | PIPO | 12 | 5.811  | 4.132 | -3.822 | 1.00 | 0.00 |
| ATOM | 217 | QB   | PIPO | 12 | 5.439  | 4.807 | -4.266 | 1.00 | 0.00 |
| ATOM | 218 | CG   | PIPO | 12 | 4.162  | 3.555 | -5.097 | 1.00 | 0.00 |
| ATOM | 219 | 2HG  | PIPO | 12 | 4.800  | 3.343 | -5.954 | 1.00 | 0.00 |
| ATOM | 220 | 3HG  | PIPO | 12 | 3.220  | 3.982 | -5.442 | 1.00 | 0.00 |
| ATOM | 221 | QG   | PIPO | 12 | 4.010  | 3.662 | -5.698 | 1.00 | 0.00 |
| ATOM | 222 | CD   | PIPO | 12 | 3.842  | 2.528 | -4.349 | 1.00 | 0.00 |

Supplementary Material for Organic & Biomolecular Chemistry  
 This journal is © The Royal Society of Chemistry 2006

|          |     |      |      |    |        |        |        |      |      |
|----------|-----|------|------|----|--------|--------|--------|------|------|
| ATOM     | 223 | 2HD  | PIPO | 12 | 4.139  | 1.595  | -4.830 | 1.00 | 0.00 |
| ATOM     | 224 | 3HD  | PIPO | 12 | 2.787  | 2.718  | -4.547 | 1.00 | 0.00 |
| ATOM     | 225 | OD   | PIPO | 12 | 3.463  | 2.157  | -4.688 | 1.00 | 0.00 |
| ATOM     | 226 | 1HE  | PIPO | 12 | 5.123  | 2.227  | -2.633 | 1.00 | 0.00 |
| ATOM     | 227 | 2HE  | PIPO | 12 | 3.470  | 1.598  | -2.432 | 1.00 | 0.00 |
| ATOM     | 228 | QE   | PIPO | 12 | 4.297  | 1.912  | -2.532 | 1.00 | 0.00 |
| ATOM     | 229 | C    | PIPO | 12 | 2.686  | 5.517  | -3.493 | 1.00 | 0.00 |
| ATOM     | 230 | O    | PIPO | 12 | 2.500  | 6.714  | -3.243 | 1.00 | 0.00 |
| ATOM     | 231 | O1'  | PHEO | 13 | 1.829  | 4.808  | -4.204 | 1.00 | 0.00 |
| ATOM     | 232 | CA   | PHEO | 13 | 0.425  | 5.190  | -4.328 | 1.00 | 0.00 |
| ATOM     | 233 | HA   | PHEO | 13 | 0.332  | 6.092  | -4.962 | 1.00 | 0.00 |
| ATOM     | 234 | CB   | PHEO | 13 | -0.148 | 5.476  | -2.907 | 1.00 | 0.00 |
| ATOM     | 235 | 2HB  | PHEO | 13 | 0.678  | 5.767  | -2.229 | 1.00 | 0.00 |
| ATOM     | 236 | QB   | PHEO | 13 | 0.678  | 5.767  | -2.229 | 1.00 | 0.00 |
| ATOM     | 237 | QD   | PHEO | 13 | -1.359 | 6.673  | -2.782 | 1.00 | 0.00 |
| ATOM     | 238 | QE   | PHEO | 13 | -3.058 | 8.437  | -2.542 | 1.00 | 0.00 |
| ATOM     | 239 | QR   | PHEO | 13 | -2.549 | 7.909  | -2.613 | 1.00 | 0.00 |
| ATOM     | 240 | CG   | PHEO | 13 | -1.249 | 6.543  | -2.816 | 1.00 | 0.00 |
| ATOM     | 241 | CD1  | PHEO | 13 | -1.014 | 7.825  | -3.325 | 1.00 | 0.00 |
| ATOM     | 242 | 1HD  | PHEO | 13 | -0.067 | 8.058  | -3.797 | 1.00 | 0.00 |
| ATOM     | 243 | CE1  | PHEO | 13 | -1.969 | 8.825  | -3.179 | 1.00 | 0.00 |
| ATOM     | 244 | 1HE  | PHEO | 13 | -1.764 | 9.820  | -3.548 | 1.00 | 0.00 |
| ATOM     | 245 | CZ   | PHEO | 13 | -3.173 | 8.547  | -2.538 | 1.00 | 0.00 |
| ATOM     | 246 | HZ   | PHEO | 13 | -3.911 | 9.325  | -2.420 | 1.00 | 0.00 |
| ATOM     | 247 | CE2  | PHEO | 13 | -3.420 | 7.269  | -2.039 | 1.00 | 0.00 |
| ATOM     | 248 | 2HE  | PHEO | 13 | -4.352 | 7.054  | -1.535 | 1.00 | 0.00 |
| ATOM     | 249 | CD2  | PHEO | 13 | -2.460 | 6.269  | -2.175 | 1.00 | 0.00 |
| ATOM     | 250 | 2HD  | PHEO | 13 | -2.650 | 5.287  | -1.767 | 1.00 | 0.00 |
| ATOM     | 251 | C    | PHEO | 13 | -0.386 | 4.076  | -4.943 | 1.00 | 0.00 |
| ATOM     | 252 | O    | PHEO | 13 | -1.604 | 4.222  | -5.244 | 1.00 | 0.00 |
| TER      |     |      |      |    |        |        |        |      |      |
| ENDMDL   |     |      |      |    |        |        |        |      |      |
| MODEL 15 |     |      |      |    |        |        |        |      |      |
| ATOM     | 1   | N    | VALM | 1  | -0.628 | 3.382  | -4.596 | 1.00 | 0.00 |
| ATOM     | 2   | QB   | VALM | 1  | -2.293 | 4.159  | -4.739 | 1.00 | 0.00 |
| ATOM     | 3   | CN   | VALM | 1  | -1.965 | 4.006  | -4.711 | 1.00 | 0.00 |
| ATOM     | 4   | 1HNB | VALM | 1  | -2.378 | 4.166  | -3.715 | 1.00 | 0.00 |
| ATOM     | 5   | 2HNB | VALM | 1  | -1.877 | 4.963  | -5.225 | 1.00 | 0.00 |
| ATOM     | 6   | 3HNB | VALM | 1  | -2.626 | 3.349  | -5.276 | 1.00 | 0.00 |
| ATOM     | 7   | CA   | VALM | 1  | -0.460 | 1.948  | -4.375 | 1.00 | 0.00 |
| ATOM     | 8   | HA   | VALM | 1  | -1.433 | 1.519  | -4.074 | 1.00 | 0.00 |
| ATOM     | 9   | CB   | VALM | 1  | 0.027  | 1.254  | -5.709 | 1.00 | 0.00 |
| ATOM     | 10  | HB   | VALM | 1  | -0.066 | 0.157  | -5.560 | 1.00 | 0.00 |
| ATOM     | 11  | QG1  | VALM | 1  | -1.004 | 1.681  | -7.340 | 1.00 | 0.00 |
| ATOM     | 12  | QG2  | VALM | 1  | 1.902  | 1.613  | -6.159 | 1.00 | 0.00 |
| ATOM     | 13  | CG1  | VALM | 1  | -0.777 | 1.591  | -6.995 | 1.00 | 0.00 |
| ATOM     | 14  | 1HG1 | VALM | 1  | -0.122 | 1.878  | -7.841 | 1.00 | 0.00 |
| ATOM     | 15  | 2HG1 | VALM | 1  | -1.399 | 0.743  | -7.337 | 1.00 | 0.00 |
| ATOM     | 16  | 3HG1 | VALM | 1  | -1.491 | 2.423  | -6.842 | 1.00 | 0.00 |
| ATOM     | 17  | CG2  | VALM | 1  | 1.505  | 1.543  | -6.063 | 1.00 | 0.00 |
| ATOM     | 18  | 1HG2 | VALM | 1  | 1.711  | 2.626  | -6.153 | 1.00 | 0.00 |
| ATOM     | 19  | 2HG2 | VALM | 1  | 2.196  | 1.141  | -5.302 | 1.00 | 0.00 |
| ATOM     | 20  | 3HG2 | VALM | 1  | 1.797  | 1.073  | -7.021 | 1.00 | 0.00 |
| ATOM     | 21  | QQG  | VALM | 1  | 0.449  | 1.647  | -6.749 | 1.00 | 0.00 |
| ATOM     | 22  | C    | VALM | 1  | 0.509  | 1.684  | -3.248 | 1.00 | 0.00 |
| ATOM     | 23  | O    | VALM | 1  | 1.490  | 2.412  | -3.109 | 1.00 | 0.00 |
| ATOM     | 24  | N    | PRO  | 2  | 0.215  | 0.628  | -2.444 | 1.00 | 0.00 |
| ATOM     | 25  | CD   | PRO  | 2  | -0.939 | -0.258 | -2.578 | 1.00 | 0.00 |
| ATOM     | 26  | CA   | PRO  | 2  | 1.073  | 0.276  | -1.326 | 1.00 | 0.00 |

|      |    |      |     |   |        |        |        |      |      |
|------|----|------|-----|---|--------|--------|--------|------|------|
| ATOM | 27 | HA   | PRO | 2 | 1.368  | 1.100  | -0.842 | 1.00 | 0.00 |
| ATOM | 28 | CB   | PRO | 2 | 0.221  | -0.621 | -0.442 | 1.00 | 0.00 |
| ATOM | 29 | 2HB  | PRO | 2 | -0.162 | -0.072 | 0.419  | 1.00 | 0.00 |
| ATOM | 30 | QB   | PRO | 2 | -0.162 | -0.072 | 0.419  | 1.00 | 0.00 |
| ATOM | 31 | CG   | PRO | 2 | -0.916 | -1.114 | -1.323 | 1.00 | 0.00 |
| ATOM | 32 | 2HG  | PRO | 2 | -1.867 | -1.042 | -0.794 | 1.00 | 0.00 |
| ATOM | 33 | QG   | PRO | 2 | -1.867 | -1.042 | -0.794 | 1.00 | 0.00 |
| ATOM | 34 | 2HD  | PRO | 2 | -1.867 | 0.310  | -2.653 | 1.00 | 0.00 |
| ATOM | 35 | QD   | PRO | 2 | -1.867 | 0.310  | -2.653 | 1.00 | 0.00 |
| ATOM | 36 | C    | PRO | 2 | 2.353  | -0.405 | -1.811 | 1.00 | 0.00 |
| ATOM | 37 | O    | PRO | 2 | 2.403  | -0.919 | -2.928 | 1.00 | 0.00 |
| ATOM | 38 | N    | ILE | 3 | 3.358  | -0.389 | -0.948 | 1.00 | 0.00 |
| ATOM | 39 | H    | ILE | 3 | 3.310  | 0.031  | -0.042 | 1.00 | 0.00 |
| ATOM | 40 | CA   | ILE | 3 | 4.636  | -0.999 | -1.274 | 1.00 | 0.00 |
| ATOM | 41 | HA   | ILE | 3 | 4.633  | -1.210 | -2.344 | 1.00 | 0.00 |
| ATOM | 42 | CB   | ILE | 3 | 5.782  | -0.019 | -1.009 | 1.00 | 0.00 |
| ATOM | 43 | HB   | ILE | 3 | 6.487  | -0.495 | -0.328 | 1.00 | 0.00 |
| ATOM | 44 | QG2  | ILE | 3 | 6.721  | 0.374  | -2.604 | 1.00 | 0.00 |
| ATOM | 45 | CG2  | ILE | 3 | 6.542  | 0.298  | -2.298 | 1.00 | 0.00 |
| ATOM | 46 | 1HG2 | ILE | 3 | 5.868  | 0.201  | -3.150 | 1.00 | 0.00 |
| ATOM | 47 | 2HG2 | ILE | 3 | 6.924  | 1.318  | -2.252 | 1.00 | 0.00 |
| ATOM | 48 | 3HG2 | ILE | 3 | 7.373  | -0.398 | -2.411 | 1.00 | 0.00 |
| ATOM | 49 | CG1  | ILE | 3 | 5.271  | 1.247  | -0.318 | 1.00 | 0.00 |
| ATOM | 50 | 2HG1 | ILE | 3 | 4.308  | 1.533  | -0.741 | 1.00 | 0.00 |
| ATOM | 51 | QG1  | ILE | 3 | 4.308  | 1.533  | -0.741 | 1.00 | 0.00 |
| ATOM | 52 | QD1  | ILE | 3 | 5.091  | 0.976  | 1.548  | 1.00 | 0.00 |
| ATOM | 53 | CD1  | ILE | 3 | 5.126  | 1.028  | 1.190  | 1.00 | 0.00 |
| ATOM | 54 | 1HD1 | ILE | 3 | 5.619  | 1.840  | 1.724  | 1.00 | 0.00 |
| ATOM | 55 | 2HD1 | ILE | 3 | 4.068  | 1.008  | 1.454  | 1.00 | 0.00 |
| ATOM | 56 | 3HD1 | ILE | 3 | 5.587  | 0.079  | 1.465  | 1.00 | 0.00 |
| ATOM | 57 | C    | ILE | 3 | 4.772  | -2.323 | -0.520 | 1.00 | 0.00 |
| ATOM | 58 | O    | ILE | 3 | 5.259  | -3.343 | -1.029 | 1.00 | 0.00 |
| ATOM | 59 | N    | PIP | 4 | 4.330  | -2.304 | 0.723  | 1.00 | 0.00 |
| ATOM | 60 | CE   | PIP | 4 | 3.760  | -1.121 | 1.329  | 1.00 | 0.00 |
| ATOM | 61 | CA   | PIP | 4 | 4.395  | -3.468 | 1.594  | 1.00 | 0.00 |
| ATOM | 62 | HA   | PIP | 4 | 5.386  | -3.922 | 1.586  | 1.00 | 0.00 |
| ATOM | 63 | CB   | PIP | 4 | 4.073  | -3.104 | 3.055  | 1.00 | 0.00 |
| ATOM | 64 | 2HB  | PIP | 4 | 4.131  | -3.998 | 3.675  | 1.00 | 0.00 |
| ATOM | 65 | 3HB  | PIP | 4 | 4.791  | -2.366 | 3.413  | 1.00 | 0.00 |
| ATOM | 66 | QB   | PIP | 4 | 4.461  | -3.182 | 3.544  | 1.00 | 0.00 |
| ATOM | 67 | CG   | PIP | 4 | 2.652  | -2.515 | 3.136  | 1.00 | 0.00 |
| ATOM | 68 | 2HG  | PIP | 4 | 2.423  | -2.257 | 4.170  | 1.00 | 0.00 |
| ATOM | 69 | 3HG  | PIP | 4 | 1.932  | -3.252 | 2.779  | 1.00 | 0.00 |
| ATOM | 70 | QG   | PIP | 4 | 2.178  | -2.754 | 3.475  | 1.00 | 0.00 |
| ATOM | 71 | CD   | PIP | 4 | 2.616  | -1.528 | 2.276  | 1.00 | 0.00 |
| ATOM | 72 | 2HD  | PIP | 4 | 2.186  | -0.635 | 2.732  | 1.00 | 0.00 |
| ATOM | 73 | 3HD  | PIP | 4 | 1.845  | -2.053 | 1.711  | 1.00 | 0.00 |
| ATOM | 74 | QD   | PIP | 4 | 2.016  | -1.344 | 2.221  | 1.00 | 0.00 |
| ATOM | 75 | 1HE  | PIP | 4 | 4.529  | -0.594 | 1.894  | 1.00 | 0.00 |
| ATOM | 76 | 2HE  | PIP | 4 | 3.370  | -0.466 | 0.550  | 1.00 | 0.00 |
| ATOM | 77 | QE   | PIP | 4 | 3.950  | -0.530 | 1.222  | 1.00 | 0.00 |
| ATOM | 78 | C    | PIP | 4 | 3.395  | -4.554 | 1.164  | 1.00 | 0.00 |
| ATOM | 79 | O    | PIP | 4 | 2.707  | -4.280 | 0.183  | 1.00 | 0.00 |
| ATOM | 80 | N    | ALA | 5 | 3.324  | -5.694 | 1.836  | 1.00 | 0.00 |
| ATOM | 81 | H    | ALA | 5 | 3.887  | -5.910 | 2.633  | 1.00 | 0.00 |
| ATOM | 82 | CA   | ALA | 5 | 2.392  | -6.738 | 1.443  | 1.00 | 0.00 |
| ATOM | 83 | HA   | ALA | 5 | 2.799  | -7.230 | 0.559  | 1.00 | 0.00 |
| ATOM | 84 | QB   | ALA | 5 | 2.244  | -8.011 | 2.836  | 1.00 | 0.00 |
| ATOM | 85 | CB   | ALA | 5 | 2.273  | -7.766 | 2.569  | 1.00 | 0.00 |

|      |     |      |      |   |        |        |        |      |      |
|------|-----|------|------|---|--------|--------|--------|------|------|
| ATOM | 86  | 1HB  | ALA  | 5 | 1.302  | -8.258 | 2.510  | 1.00 | 0.00 |
| ATOM | 87  | 2HB  | ALA  | 5 | 3.063  | -8.510 | 2.468  | 1.00 | 0.00 |
| ATOM | 88  | 3HB  | ALA  | 5 | 2.367  | -7.264 | 3.532  | 1.00 | 0.00 |
| ATOM | 89  | C    | ALA  | 5 | 1.046  | -6.105 | 1.084  | 1.00 | 0.00 |
| ATOM | 90  | O    | ALA  | 5 | 0.710  | -5.031 | 1.579  | 1.00 | 0.00 |
| ATOM | 91  | N    | PRO  | 6 | 0.293  | -6.817 | 0.203  | 1.00 | 0.00 |
| ATOM | 92  | CD   | PRO  | 6 | 0.661  | -8.094 | -0.404 | 1.00 | 0.00 |
| ATOM | 93  | CA   | PRO  | 6 | -1.009 | -6.337 | -0.228 | 1.00 | 0.00 |
| ATOM | 94  | HA   | PRO  | 6 | -0.975 | -5.354 | -0.405 | 1.00 | 0.00 |
| ATOM | 95  | CB   | PRO  | 6 | -1.322 | -7.128 | -1.487 | 1.00 | 0.00 |
| ATOM | 96  | 2HB  | PRO  | 6 | -1.145 | -6.527 | -2.379 | 1.00 | 0.00 |
| ATOM | 97  | QB   | PRO  | 6 | -1.145 | -6.527 | -2.379 | 1.00 | 0.00 |
| ATOM | 98  | CG   | PRO  | 6 | -0.408 | -8.341 | -1.457 | 1.00 | 0.00 |
| ATOM | 99  | 2HG  | PRO  | 6 | 0.049  | -8.498 | -2.435 | 1.00 | 0.00 |
| ATOM | 100 | QG   | PRO  | 6 | 0.049  | -8.498 | -2.435 | 1.00 | 0.00 |
| ATOM | 101 | 2HD  | PRO  | 6 | 1.653  | -8.049 | -0.851 | 1.00 | 0.00 |
| ATOM | 102 | QD   | PRO  | 6 | 1.653  | -8.049 | -0.851 | 1.00 | 0.00 |
| ATOM | 103 | C    | PRO  | 6 | -2.055 | -6.528 | 0.873  | 1.00 | 0.00 |
| ATOM | 104 | O    | PRO  | 6 | -2.341 | -7.633 | 1.347  | 1.00 | 0.00 |
| ATOM | 105 | N    | THRM | 7 | -2.637 | -5.418 | 1.288  | 1.00 | 0.00 |
| ATOM | 106 | QB   | THRM | 7 | -3.902 | -5.614 | 2.614  | 1.00 | 0.00 |
| ATOM | 107 | CN   | THRM | 7 | -3.652 | -5.576 | 2.351  | 1.00 | 0.00 |
| ATOM | 108 | 1HNB | THRM | 7 | -3.742 | -6.629 | 2.616  | 1.00 | 0.00 |
| ATOM | 109 | 2HNB | THRM | 7 | -3.351 | -5.006 | 3.231  | 1.00 | 0.00 |
| ATOM | 110 | 3HNB | THRM | 7 | -4.615 | -5.208 | 1.994  | 1.00 | 0.00 |
| ATOM | 111 | CA   | THRM | 7 | -2.299 | -4.112 | 0.728  | 1.00 | 0.00 |
| ATOM | 112 | HA   | THRM | 7 | -1.204 | -4.064 | 0.590  | 1.00 | 0.00 |
| ATOM | 113 | CB   | THRM | 7 | -2.990 | -3.914 | -0.663 | 1.00 | 0.00 |
| ATOM | 114 | HB   | THRM | 7 | -3.500 | -2.926 | -0.663 | 1.00 | 0.00 |
| ATOM | 115 | QG2  | THRM | 7 | -1.826 | -4.006 | -2.237 | 1.00 | 0.00 |
| ATOM | 116 | OG1  | THRM | 7 | -3.965 | -4.926 | -0.883 | 1.00 | 0.00 |
| ATOM | 117 | 1HG  | THRM | 7 | -4.388 | -5.079 | -0.033 | 1.00 | 0.00 |
| ATOM | 118 | CG2  | THRM | 7 | -2.071 | -3.986 | -1.901 | 1.00 | 0.00 |
| ATOM | 119 | 1HG2 | THRM | 7 | -2.269 | -4.883 | -2.515 | 1.00 | 0.00 |
| ATOM | 120 | 2HG2 | THRM | 7 | -2.207 | -3.123 | -2.580 | 1.00 | 0.00 |
| ATOM | 121 | 3HG2 | THRM | 7 | -1.002 | -4.012 | -1.617 | 1.00 | 0.00 |
| ATOM | 122 | C    | THRM | 7 | -2.682 | -3.001 | 1.677  | 1.00 | 0.00 |
| ATOM | 123 | O    | THRM | 7 | -3.529 | -3.211 | 2.544  | 1.00 | 0.00 |
| ATOM | 124 | N    | VAL  | 8 | -2.058 | -1.846 | 1.501  | 1.00 | 0.00 |
| ATOM | 125 | H    | VAL  | 8 | -1.370 | -1.684 | 0.793  | 1.00 | 0.00 |
| ATOM | 126 | CA   | VAL  | 8 | -2.343 | -0.704 | 2.352  | 1.00 | 0.00 |
| ATOM | 127 | HA   | VAL  | 8 | -3.349 | -0.834 | 2.753  | 1.00 | 0.00 |
| ATOM | 128 | CB   | VAL  | 8 | -1.365 | -0.673 | 3.530  | 1.00 | 0.00 |
| ATOM | 129 | HB   | VAL  | 8 | -1.148 | 0.371  | 3.757  | 1.00 | 0.00 |
| ATOM | 130 | QG1  | VAL  | 8 | -2.135 | -1.457 | 5.072  | 1.00 | 0.00 |
| ATOM | 131 | QG2  | VAL  | 8 | 0.266  | -1.521 | 3.080  | 1.00 | 0.00 |
| ATOM | 132 | CG1  | VAL  | 8 | -1.988 | -1.307 | 4.776  | 1.00 | 0.00 |
| ATOM | 133 | 1HG1 | VAL  | 8 | -2.861 | -1.892 | 4.488  | 1.00 | 0.00 |
| ATOM | 134 | 2HG1 | VAL  | 8 | -1.256 | -1.956 | 5.257  | 1.00 | 0.00 |
| ATOM | 135 | 3HG1 | VAL  | 8 | -2.289 | -0.522 | 5.471  | 1.00 | 0.00 |
| ATOM | 136 | CG2  | VAL  | 8 | -0.047 | -1.359 | 3.167  | 1.00 | 0.00 |
| ATOM | 137 | 1HG2 | VAL  | 8 | -0.204 | -2.435 | 3.098  | 1.00 | 0.00 |
| ATOM | 138 | 2HG2 | VAL  | 8 | 0.306  | -0.981 | 2.207  | 1.00 | 0.00 |
| ATOM | 139 | 3HG2 | VAL  | 8 | 0.696  | -1.147 | 3.935  | 1.00 | 0.00 |
| ATOM | 140 | QQG  | VAL  | 8 | -0.934 | -1.489 | 4.076  | 1.00 | 0.00 |
| ATOM | 141 | C    | VAL  | 8 | -2.308 | 0.574  | 1.514  | 1.00 | 0.00 |
| ATOM | 142 | O    | VAL  | 8 | -1.914 | 0.601  | 0.341  | 1.00 | 0.00 |
| ATOM | 143 | N    | THRM | 9 | -2.733 | 1.660  | 2.133  | 1.00 | 0.00 |
| ATOM | 144 | QB   | THRM | 9 | -3.282 | 1.433  | 3.878  | 1.00 | 0.00 |

|      |     |      |      |    |        |       |        |      |      |
|------|-----|------|------|----|--------|-------|--------|------|------|
| ATOM | 145 | CN   | THRM | 9  | -3.174 | 1.477 | 3.534  | 1.00 | 0.00 |
| ATOM | 146 | 1HNB | THRM | 9  | -3.064 | 0.430 | 3.816  | 1.00 | 0.00 |
| ATOM | 147 | 2HNB | THRM | 9  | -2.563 | 2.097 | 4.190  | 1.00 | 0.00 |
| ATOM | 148 | 3HNB | THRM | 9  | -4.219 | 1.771 | 3.627  | 1.00 | 0.00 |
| ATOM | 149 | CA   | THRM | 9  | -2.766 | 2.963 | 1.475  | 1.00 | 0.00 |
| ATOM | 150 | HA   | THRM | 9  | -2.440 | 2.833 | 0.427  | 1.00 | 0.00 |
| ATOM | 151 | CB   | THRM | 9  | -4.219 | 3.547 | 1.483  | 1.00 | 0.00 |
| ATOM | 152 | HB   | THRM | 9  | -4.305 | 4.256 | 2.333  | 1.00 | 0.00 |
| ATOM | 153 | QG2  | THRM | 9  | -4.791 | 4.471 | -0.148 | 1.00 | 0.00 |
| ATOM | 154 | OG1  | THRM | 9  | -5.172 | 2.507 | 1.660  | 1.00 | 0.00 |
| ATOM | 155 | 1HG  | THRM | 9  | -5.990 | 2.938 | 1.923  | 1.00 | 0.00 |
| ATOM | 156 | CG2  | THRM | 9  | -4.671 | 4.272 | 0.197  | 1.00 | 0.00 |
| ATOM | 157 | 1HG2 | THRM | 9  | -4.919 | 5.333 | 0.384  | 1.00 | 0.00 |
| ATOM | 158 | 2HG2 | THRM | 9  | -3.888 | 4.280 | -0.582 | 1.00 | 0.00 |
| ATOM | 159 | 3HG2 | THRM | 9  | -5.567 | 3.799 | -0.247 | 1.00 | 0.00 |
| ATOM | 160 | C    | THRM | 9  | -1.801 | 3.923 | 2.129  | 1.00 | 0.00 |
| ATOM | 161 | O    | THRM | 9  | -2.183 | 4.886 | 2.765  | 1.00 | 0.00 |
| ATOM | 162 | N    | VALM | 10 | -0.518 | 3.655 | 1.970  | 1.00 | 0.00 |
| ATOM | 163 | QB   | VALM | 10 | -0.126 | 2.153 | 0.975  | 1.00 | 0.00 |
| ATOM | 164 | CN   | VALM | 10 | -0.203 | 2.450 | 1.170  | 1.00 | 0.00 |
| ATOM | 165 | 1HNB | VALM | 10 | -0.793 | 2.455 | 0.255  | 1.00 | 0.00 |
| ATOM | 166 | 2HNB | VALM | 10 | 0.857  | 2.446 | 0.919  | 1.00 | 0.00 |
| ATOM | 167 | 3HNB | VALM | 10 | -0.442 | 1.557 | 1.750  | 1.00 | 0.00 |
| ATOM | 168 | CA   | VALM | 10 | 0.527  | 4.497 | 2.545  | 1.00 | 0.00 |
| ATOM | 169 | HA   | VALM | 10 | 0.169  | 5.543 | 2.566  | 1.00 | 0.00 |
| ATOM | 170 | CB   | VALM | 10 | 0.844  | 4.024 | 4.020  | 1.00 | 0.00 |
| ATOM | 171 | HB   | VALM | 10 | 1.727  | 3.354 | 3.965  | 1.00 | 0.00 |
| ATOM | 172 | QG1  | VALM | 10 | 1.289  | 5.440 | 5.323  | 1.00 | 0.00 |
| ATOM | 173 | QG2  | VALM | 10 | -0.609 | 3.001 | 4.850  | 1.00 | 0.00 |
| ATOM | 174 | CG1  | VALM | 10 | 1.200  | 5.140 | 5.039  | 1.00 | 0.00 |
| ATOM | 175 | 1HG1 | VALM | 10 | 2.024  | 5.788 | 4.687  | 1.00 | 0.00 |
| ATOM | 176 | 2HG1 | VALM | 10 | 0.338  | 5.799 | 5.259  | 1.00 | 0.00 |
| ATOM | 177 | 3HG1 | VALM | 10 | 1.504  | 4.733 | 6.022  | 1.00 | 0.00 |
| ATOM | 178 | CG2  | VALM | 10 | -0.301 | 3.218 | 4.680  | 1.00 | 0.00 |
| ATOM | 179 | 1HG2 | VALM | 10 | -0.192 | 3.158 | 5.779  | 1.00 | 0.00 |
| ATOM | 180 | 2HG2 | VALM | 10 | -1.290 | 3.664 | 4.473  | 1.00 | 0.00 |
| ATOM | 181 | 3HG2 | VALM | 10 | -0.347 | 2.181 | 4.297  | 1.00 | 0.00 |
| ATOM | 182 | QQG  | VALM | 10 | 0.340  | 4.221 | 5.086  | 1.00 | 0.00 |
| ATOM | 183 | C    | VALM | 10 | 1.772  | 4.471 | 1.693  | 1.00 | 0.00 |
| ATOM | 184 | O    | VALM | 10 | 2.834  | 3.983 | 2.099  | 1.00 | 0.00 |
| ATOM | 185 | N    | ILEM | 11 | 1.661  | 5.002 | 0.489  | 1.00 | 0.00 |
| ATOM | 186 | QB   | ILEM | 11 | 0.003  | 5.681 | 0.056  | 1.00 | 0.00 |
| ATOM | 187 | CN   | ILEM | 11 | 0.330  | 5.547 | 0.141  | 1.00 | 0.00 |
| ATOM | 188 | 1HNB | ILEM | 11 | -0.352 | 5.407 | 0.981  | 1.00 | 0.00 |
| ATOM | 189 | 2HNB | ILEM | 11 | 0.420  | 6.611 | -0.079 | 1.00 | 0.00 |
| ATOM | 190 | 3HNB | ILEM | 11 | -0.059 | 5.026 | -0.733 | 1.00 | 0.00 |
| ATOM | 191 | CA   | ILEM | 11 | 2.784  | 5.047 | -0.443 | 1.00 | 0.00 |
| ATOM | 192 | HA   | ILEM | 11 | 2.482  | 5.677 | -1.299 | 1.00 | 0.00 |
| ATOM | 193 | CB   | ILEM | 11 | 4.064  | 5.695 | 0.226  | 1.00 | 0.00 |
| ATOM | 194 | HB   | ILEM | 11 | 3.856  | 5.752 | 1.316  | 1.00 | 0.00 |
| ATOM | 195 | QG2  | ILEM | 11 | 5.693  | 4.589 | -0.014 | 1.00 | 0.00 |
| ATOM | 196 | CG2  | ILEM | 11 | 5.348  | 4.832 | 0.036  | 1.00 | 0.00 |
| ATOM | 197 | 1HG2 | ILEM | 11 | 5.318  | 3.896 | 0.623  | 1.00 | 0.00 |
| ATOM | 198 | 2HG2 | ILEM | 11 | 5.497  | 4.496 | -1.005 | 1.00 | 0.00 |
| ATOM | 199 | 3HG2 | ILEM | 11 | 6.263  | 5.374 | 0.341  | 1.00 | 0.00 |
| ATOM | 200 | CG1  | ILEM | 11 | 4.381  | 7.149 | -0.248 | 1.00 | 0.00 |
| ATOM | 201 | 2HG1 | ILEM | 11 | 4.698  | 7.760 | 0.619  | 1.00 | 0.00 |
| ATOM | 202 | QG1  | ILEM | 11 | 4.698  | 7.760 | 0.619  | 1.00 | 0.00 |
| ATOM | 203 | QD1  | ILEM | 11 | 5.809  | 7.327 | -1.568 | 1.00 | 0.00 |

Supplementary Material for Organic & Biomolecular Chemistry  
 This journal is © The Royal Society of Chemistry 2006

|          |     |      |      |    |        |        |        |      |      |
|----------|-----|------|------|----|--------|--------|--------|------|------|
| ATOM     | 204 | CD1  | ILEM | 11 | 5.507  | 7.286  | -1.294 | 1.00 | 0.00 |
| ATOM     | 205 | 1HD1 | ILEM | 11 | 6.152  | 8.156  | -1.075 | 1.00 | 0.00 |
| ATOM     | 206 | 2HD1 | ILEM | 11 | 6.159  | 6.393  | -1.312 | 1.00 | 0.00 |
| ATOM     | 207 | 3HD1 | ILEM | 11 | 5.117  | 7.432  | -2.317 | 1.00 | 0.00 |
| ATOM     | 208 | C    | ILEM | 11 | 3.077  | 3.676  | -1.005 | 1.00 | 0.00 |
| ATOM     | 209 | O    | ILEM | 11 | 2.740  | 2.638  | -0.414 | 1.00 | 0.00 |
| ATOM     | 210 | N    | PIPO | 12 | 3.713  | 3.647  | -2.161 | 1.00 | 0.00 |
| ATOM     | 211 | CE   | PIPO | 12 | 4.065  | 2.412  | -2.824 | 1.00 | 0.00 |
| ATOM     | 212 | CA   | PIPO | 12 | 4.128  | 4.858  | -2.854 | 1.00 | 0.00 |
| ATOM     | 213 | HA   | PIPO | 12 | 4.650  | 5.544  | -2.188 | 1.00 | 0.00 |
| ATOM     | 214 | CB   | PIPO | 12 | 5.079  | 4.544  | -4.023 | 1.00 | 0.00 |
| ATOM     | 215 | 2HB  | PIPO | 12 | 5.367  | 5.471  | -4.517 | 1.00 | 0.00 |
| ATOM     | 216 | 3HB  | PIPO | 12 | 5.970  | 4.043  | -3.644 | 1.00 | 0.00 |
| ATOM     | 217 | QB   | PIPO | 12 | 5.668  | 4.757  | -4.081 | 1.00 | 0.00 |
| ATOM     | 218 | CG   | PIPO | 12 | 4.367  | 3.625  | -5.033 | 1.00 | 0.00 |
| ATOM     | 219 | 2HG  | PIPO | 12 | 5.041  | 3.403  | -5.861 | 1.00 | 0.00 |
| ATOM     | 220 | 3HG  | PIPO | 12 | 3.477  | 4.125  | -5.414 | 1.00 | 0.00 |
| ATOM     | 221 | QG   | PIPO | 12 | 4.259  | 3.764  | -5.638 | 1.00 | 0.00 |
| ATOM     | 222 | CD   | PIPO | 12 | 3.938  | 2.592  | -4.349 | 1.00 | 0.00 |
| ATOM     | 223 | 2HD  | PIPO | 12 | 4.203  | 1.661  | -4.849 | 1.00 | 0.00 |
| ATOM     | 224 | 3HD  | PIPO | 12 | 2.911  | 2.860  | -4.598 | 1.00 | 0.00 |
| ATOM     | 225 | QD   | PIPO | 12 | 3.557  | 2.261  | -4.724 | 1.00 | 0.00 |
| ATOM     | 226 | 1HE  | PIPO | 12 | 5.091  | 2.145  | -2.576 | 1.00 | 0.00 |
| ATOM     | 227 | 2HE  | PIPO | 12 | 3.393  | 1.618  | -2.496 | 1.00 | 0.00 |
| ATOM     | 228 | QE   | PIPO | 12 | 4.242  | 1.881  | -2.536 | 1.00 | 0.00 |
| ATOM     | 229 | C    | PIPO | 12 | 2.925  | 5.618  | -3.437 | 1.00 | 0.00 |
| ATOM     | 230 | O    | PIPO | 12 | 2.699  | 6.758  | -3.015 | 1.00 | 0.00 |
| ATOM     | 231 | O1'  | PHEO | 13 | 2.174  | 5.054  | -4.366 | 1.00 | 0.00 |
| ATOM     | 232 | CA   | PHEO | 13 | 0.733  | 5.275  | -4.435 | 1.00 | 0.00 |
| ATOM     | 233 | HA   | PHEO | 13 | 0.516  | 6.189  | -5.018 | 1.00 | 0.00 |
| ATOM     | 234 | CB   | PHEO | 13 | 0.175  | 5.424  | -2.987 | 1.00 | 0.00 |
| ATOM     | 235 | 2HB  | PHEO | 13 | 0.944  | 5.096  | -2.261 | 1.00 | 0.00 |
| ATOM     | 236 | QB   | PHEO | 13 | 0.944  | 5.096  | -2.261 | 1.00 | 0.00 |
| ATOM     | 237 | QD   | PHEO | 13 | -0.385 | 6.977  | -2.555 | 1.00 | 0.00 |
| ATOM     | 238 | QE   | PHEO | 13 | -1.263 | 9.202  | -1.974 | 1.00 | 0.00 |
| ATOM     | 239 | QR   | PHEO | 13 | -1.001 | 8.536  | -2.148 | 1.00 | 0.00 |
| ATOM     | 240 | CG   | PHEO | 13 | -0.309 | 6.825  | -2.582 | 1.00 | 0.00 |
| ATOM     | 241 | CD1  | PHEO | 13 | -1.328 | 6.956  | -1.632 | 1.00 | 0.00 |
| ATOM     | 242 | 1HD  | PHEO | 13 | -1.762 | 6.076  | -1.173 | 1.00 | 0.00 |
| ATOM     | 243 | CE1  | PHEO | 13 | -1.833 | 8.212  | -1.312 | 1.00 | 0.00 |
| ATOM     | 244 | 1HE  | PHEO | 13 | -2.641 | 8.300  | -0.601 | 1.00 | 0.00 |
| ATOM     | 245 | CZ   | PHEO | 13 | -1.310 | 9.347  | -1.927 | 1.00 | 0.00 |
| ATOM     | 246 | HZ   | PHEO | 13 | -1.707 | 10.321 | -1.683 | 1.00 | 0.00 |
| ATOM     | 247 | CE2  | PHEO | 13 | -0.286 | 9.225  | -2.865 | 1.00 | 0.00 |
| ATOM     | 248 | 2HE  | PHEO | 13 | 0.115  | 10.104 | -3.347 | 1.00 | 0.00 |
| ATOM     | 249 | CD2  | PHEO | 13 | 0.212  | 7.967  | -3.193 | 1.00 | 0.00 |
| ATOM     | 250 | 2HD  | PHEO | 13 | 0.992  | 7.878  | -3.937 | 1.00 | 0.00 |
| ATOM     | 251 | C    | PHEO | 13 | 0.036  | 4.104  | -5.087 | 1.00 | 0.00 |
| ATOM     | 252 | O    | PHEO | 13 | 0.004  | 3.958  | -6.340 | 1.00 | 0.00 |
| TER      |     |      |      |    |        |        |        |      |      |
| ENDMDL   |     |      |      |    |        |        |        |      |      |
| MODEL 16 |     |      |      |    |        |        |        |      |      |
| ATOM     | 1   | N    | VALM | 1  | -0.202 | 3.122  | -5.127 | 1.00 | 0.00 |
| ATOM     | 2   | QB   | VALM | 1  | -0.779 | 3.507  | -6.835 | 1.00 | 0.00 |
| ATOM     | 3   | CN   | VALM | 1  | -0.665 | 3.431  | -6.498 | 1.00 | 0.00 |
| ATOM     | 4   | 1HNB | VALM | 1  | -1.474 | 2.753  | -6.771 | 1.00 | 0.00 |
| ATOM     | 5   | 2HNB | VALM | 1  | -1.025 | 4.459  | -6.538 | 1.00 | 0.00 |
| ATOM     | 6   | 3HNB | VALM | 1  | 0.162  | 3.310  | -7.197 | 1.00 | 0.00 |
| ATOM     | 7   | CA   | VALM | 1  | -0.405 | 1.810  | -4.520 | 1.00 | 0.00 |



|      |    |      |      |   |        |        |        |      |      |
|------|----|------|------|---|--------|--------|--------|------|------|
| ATOM | 8  | HA   | VALM | 1 | -1.426 | 1.765  | -4.101 | 1.00 | 0.00 |
| ATOM | 9  | CB   | VALM | 1 | -0.240 | 0.682  | -5.615 | 1.00 | 0.00 |
| ATOM | 10 | HB   | VALM | 1 | -0.043 | -0.270 | -5.077 | 1.00 | 0.00 |
| ATOM | 11 | QG1  | VALM | 1 | -1.808 | 0.351  | -6.770 | 1.00 | 0.00 |
| ATOM | 12 | QG2  | VALM | 1 | 1.269  | 0.978  | -6.833 | 1.00 | 0.00 |
| ATOM | 13 | CG1  | VALM | 1 | -1.468 | 0.424  | -6.530 | 1.00 | 0.00 |
| ATOM | 14 | 1HG1 | VALM | 1 | -1.268 | 0.676  | -7.589 | 1.00 | 0.00 |
| ATOM | 15 | 2HG1 | VALM | 1 | -1.800 | -0.632 | -6.502 | 1.00 | 0.00 |
| ATOM | 16 | 3HG1 | VALM | 1 | -2.356 | 1.008  | -6.220 | 1.00 | 0.00 |
| ATOM | 17 | CG2  | VALM | 1 | 0.947  | 0.913  | -6.581 | 1.00 | 0.00 |
| ATOM | 18 | 1HG2 | VALM | 1 | 0.717  | 0.591  | -7.613 | 1.00 | 0.00 |
| ATOM | 19 | 2HG2 | VALM | 1 | 1.236  | 1.979  | -6.629 | 1.00 | 0.00 |
| ATOM | 20 | 3HG2 | VALM | 1 | 1.853  | 0.365  | -6.258 | 1.00 | 0.00 |
| ATOM | 21 | QQG  | VALM | 1 | -0.270 | 0.665  | -6.802 | 1.00 | 0.00 |
| ATOM | 22 | C    | VALM | 1 | 0.553  | 1.589  | -3.374 | 1.00 | 0.00 |
| ATOM | 23 | O    | VALM | 1 | 1.538  | 2.319  | -3.258 | 1.00 | 0.00 |
| ATOM | 24 | N    | PRO  | 2 | 0.247  | 0.570  | -2.528 | 1.00 | 0.00 |
| ATOM | 25 | CD   | PRO  | 2 | -0.909 | -0.316 | -2.634 | 1.00 | 0.00 |
| ATOM | 26 | CA   | PRO  | 2 | 1.095  | 0.262  | -1.388 | 1.00 | 0.00 |
| ATOM | 27 | HA   | PRO  | 2 | 1.390  | 1.105  | -0.938 | 1.00 | 0.00 |
| ATOM | 28 | CB   | PRO  | 2 | 0.231  | -0.593 | -0.475 | 1.00 | 0.00 |
| ATOM | 29 | 2HB  | PRO  | 2 | -0.155 | -0.005 | 0.358  | 1.00 | 0.00 |
| ATOM | 30 | QB   | PRO  | 2 | -0.155 | -0.005 | 0.358  | 1.00 | 0.00 |
| ATOM | 31 | CG   | PRO  | 2 | -0.901 | -1.117 | -1.343 | 1.00 | 0.00 |
| ATOM | 32 | 2HG  | PRO  | 2 | -1.855 | -1.020 | -0.826 | 1.00 | 0.00 |
| ATOM | 33 | QG   | PRO  | 2 | -1.855 | -1.020 | -0.826 | 1.00 | 0.00 |
| ATOM | 34 | 2HD  | PRO  | 2 | -1.834 | 0.252  | -2.741 | 1.00 | 0.00 |
| ATOM | 35 | QD   | PRO  | 2 | -1.834 | 0.252  | -2.741 | 1.00 | 0.00 |
| ATOM | 36 | C    | PRO  | 2 | 2.377  | -0.445 | -1.834 | 1.00 | 0.00 |
| ATOM | 37 | O    | PRO  | 2 | 2.426  | -1.027 | -2.916 | 1.00 | 0.00 |
| ATOM | 38 | N    | ILE  | 3 | 3.384  | -0.371 | -0.976 | 1.00 | 0.00 |
| ATOM | 39 | H    | ILE  | 3 | 3.336  | 0.105  | -0.097 | 1.00 | 0.00 |
| ATOM | 40 | CA   | ILE  | 3 | 4.662  | -0.997 | -1.267 | 1.00 | 0.00 |
| ATOM | 41 | HA   | ILE  | 3 | 4.676  | -1.233 | -2.330 | 1.00 | 0.00 |
| ATOM | 42 | CB   | ILE  | 3 | 5.809  | -0.018 | -1.005 | 1.00 | 0.00 |
| ATOM | 43 | HB   | ILE  | 3 | 6.503  | -0.485 | -0.306 | 1.00 | 0.00 |
| ATOM | 44 | QG2  | ILE  | 3 | 6.775  | 0.335  | -2.595 | 1.00 | 0.00 |
| ATOM | 45 | CG2  | ILE  | 3 | 6.590  | 0.268  | -2.290 | 1.00 | 0.00 |
| ATOM | 46 | 1HG2 | ILE  | 3 | 5.892  | 0.397  | -3.118 | 1.00 | 0.00 |
| ATOM | 47 | 2HG2 | ILE  | 3 | 7.176  | 1.177  | -2.164 | 1.00 | 0.00 |
| ATOM | 48 | 3HG2 | ILE  | 3 | 7.256  | -0.568 | -2.504 | 1.00 | 0.00 |
| ATOM | 49 | CG1  | ILE  | 3 | 5.297  | 1.265  | -0.348 | 1.00 | 0.00 |
| ATOM | 50 | 2HG1 | ILE  | 3 | 4.347  | 1.553  | -0.797 | 1.00 | 0.00 |
| ATOM | 51 | QG1  | ILE  | 3 | 4.347  | 1.553  | -0.797 | 1.00 | 0.00 |
| ATOM | 52 | QD1  | ILE  | 3 | 5.074  | 1.029  | 1.518  | 1.00 | 0.00 |
| ATOM | 53 | CD1  | ILE  | 3 | 5.117  | 1.075  | 1.160  | 1.00 | 0.00 |
| ATOM | 54 | 1HD1 | ILE  | 3 | 5.613  | 1.888  | 1.690  | 1.00 | 0.00 |
| ATOM | 55 | 2HD1 | ILE  | 3 | 4.054  | 1.076  | 1.402  | 1.00 | 0.00 |
| ATOM | 56 | 3HD1 | ILE  | 3 | 5.556  | 0.123  | 1.461  | 1.00 | 0.00 |
| ATOM | 57 | C    | ILE  | 3 | 4.777  | -2.303 | -0.478 | 1.00 | 0.00 |
| ATOM | 58 | O    | ILE  | 3 | 5.272  | -3.337 | -0.953 | 1.00 | 0.00 |
| ATOM | 59 | N    | PIP  | 4 | 4.308  | -2.254 | 0.755  | 1.00 | 0.00 |
| ATOM | 60 | CE   | PIP  | 4 | 3.729  | -1.054 | 1.319  | 1.00 | 0.00 |
| ATOM | 61 | CA   | PIP  | 4 | 4.351  | -3.397 | 1.653  | 1.00 | 0.00 |
| ATOM | 62 | HA   | PIP  | 4 | 5.340  | -3.854 | 1.677  | 1.00 | 0.00 |
| ATOM | 63 | CB   | PIP  | 4 | 3.998  | -2.997 | 3.098  | 1.00 | 0.00 |
| ATOM | 64 | 2HB  | PIP  | 4 | 4.040  | -3.877 | 3.740  | 1.00 | 0.00 |
| ATOM | 65 | 3HB  | PIP  | 4 | 4.711  | -2.255 | 3.454  | 1.00 | 0.00 |
| ATOM | 66 | QB   | PIP  | 4 | 4.375  | -3.066 | 3.597  | 1.00 | 0.00 |

|      |     |      |      |   |        |        |        |      |      |
|------|-----|------|------|---|--------|--------|--------|------|------|
| ATOM | 67  | CG   | PIP  | 4 | 2.578  | -2.403 | 3.135  | 1.00 | 0.00 |
| ATOM | 68  | 2HG  | PIP  | 4 | 2.329  | -2.120 | 4.158  | 1.00 | 0.00 |
| ATOM | 69  | 3HG  | PIP  | 4 | 1.864  | -3.146 | 2.779  | 1.00 | 0.00 |
| ATOM | 70  | QG   | PIP  | 4 | 2.096  | -2.633 | 3.469  | 1.00 | 0.00 |
| ATOM | 71  | CD   | PIP  | 4 | 2.563  | -1.436 | 2.251  | 1.00 | 0.00 |
| ATOM | 72  | 2HD  | PIP  | 4 | 2.128  | -0.531 | 2.676  | 1.00 | 0.00 |
| ATOM | 73  | 3HD  | PIP  | 4 | 1.804  | -1.972 | 1.682  | 1.00 | 0.00 |
| ATOM | 74  | OD   | PIP  | 4 | 1.966  | -1.252 | 2.179  | 1.00 | 0.00 |
| ATOM | 75  | 1HE  | PIP  | 4 | 4.488  | -0.518 | 1.889  | 1.00 | 0.00 |
| ATOM | 76  | 2HE  | PIP  | 4 | 3.359  | -0.417 | 0.517  | 1.00 | 0.00 |
| ATOM | 77  | QE   | PIP  | 4 | 3.924  | -0.467 | 1.203  | 1.00 | 0.00 |
| ATOM | 78  | C    | PIP  | 4 | 3.355  | -4.490 | 1.228  | 1.00 | 0.00 |
| ATOM | 79  | O    | PIP  | 4 | 2.666  | -4.223 | 0.244  | 1.00 | 0.00 |
| ATOM | 80  | N    | ALA  | 5 | 3.289  | -5.628 | 1.904  | 1.00 | 0.00 |
| ATOM | 81  | H    | ALA  | 5 | 3.853  | -5.836 | 2.703  | 1.00 | 0.00 |
| ATOM | 82  | CA   | ALA  | 5 | 2.363  | -6.677 | 1.515  | 1.00 | 0.00 |
| ATOM | 83  | HA   | ALA  | 5 | 2.787  | -7.190 | 0.651  | 1.00 | 0.00 |
| ATOM | 84  | QB   | ALA  | 5 | 2.181  | -7.917 | 2.933  | 1.00 | 0.00 |
| ATOM | 85  | CB   | ALA  | 5 | 2.215  | -7.679 | 2.661  | 1.00 | 0.00 |
| ATOM | 86  | 1HB  | ALA  | 5 | 3.049  | -7.564 | 3.354  | 1.00 | 0.00 |
| ATOM | 87  | 2HB  | ALA  | 5 | 1.278  | -7.496 | 3.185  | 1.00 | 0.00 |
| ATOM | 88  | 3HB  | ALA  | 5 | 2.215  | -8.692 | 2.260  | 1.00 | 0.00 |
| ATOM | 89  | C    | ALA  | 5 | 1.026  | -6.049 | 1.113  | 1.00 | 0.00 |
| ATOM | 90  | O    | ALA  | 5 | 0.663  | -4.985 | 1.611  | 1.00 | 0.00 |
| ATOM | 91  | N    | PRO  | 6 | 0.314  | -6.753 | 0.193  | 1.00 | 0.00 |
| ATOM | 92  | CD   | PRO  | 6 | 0.715  | -8.017 | -0.418 | 1.00 | 0.00 |
| ATOM | 93  | CA   | PRO  | 6 | -0.974 | -6.276 | -0.281 | 1.00 | 0.00 |
| ATOM | 94  | HA   | PRO  | 6 | -0.941 | -5.289 | -0.442 | 1.00 | 0.00 |
| ATOM | 95  | CB   | PRO  | 6 | -1.232 | -7.049 | -1.564 | 1.00 | 0.00 |
| ATOM | 96  | 2HB  | PRO  | 6 | -1.025 | -6.433 | -2.439 | 1.00 | 0.00 |
| ATOM | 97  | QB   | PRO  | 6 | -1.025 | -6.433 | -2.439 | 1.00 | 0.00 |
| ATOM | 98  | CG   | PRO  | 6 | -0.309 | -8.256 | -1.516 | 1.00 | 0.00 |
| ATOM | 99  | 2HG  | PRO  | 6 | 0.186  | -8.396 | -2.477 | 1.00 | 0.00 |
| ATOM | 100 | QG   | PRO  | 6 | 0.186  | -8.396 | -2.477 | 1.00 | 0.00 |
| ATOM | 101 | 2HD  | PRO  | 6 | 1.724  | -7.958 | -0.825 | 1.00 | 0.00 |
| ATOM | 102 | QD   | PRO  | 6 | 1.724  | -7.958 | -0.825 | 1.00 | 0.00 |
| ATOM | 103 | C    | PRO  | 6 | -2.060 | -6.491 | 0.776  | 1.00 | 0.00 |
| ATOM | 104 | O    | PRO  | 6 | -2.355 | -7.606 | 1.223  | 1.00 | 0.00 |
| ATOM | 105 | N    | THRM | 7 | -2.668 | -5.391 | 1.182  | 1.00 | 0.00 |
| ATOM | 106 | QB   | THRM | 7 | -3.982 | -5.618 | 2.455  | 1.00 | 0.00 |
| ATOM | 107 | CN   | THRM | 7 | -3.723 | -5.574 | 2.203  | 1.00 | 0.00 |
| ATOM | 108 | 1HNB | THRM | 7 | -3.813 | -6.631 | 2.448  | 1.00 | 0.00 |
| ATOM | 109 | 2HNB | THRM | 7 | -3.460 | -5.014 | 3.101  | 1.00 | 0.00 |
| ATOM | 110 | 3HNB | THRM | 7 | -4.674 | -5.209 | 1.814  | 1.00 | 0.00 |
| ATOM | 111 | CA   | THRM | 7 | -2.320 | -4.075 | 0.654  | 1.00 | 0.00 |
| ATOM | 112 | HA   | THRM | 7 | -1.224 | -4.029 | 0.526  | 1.00 | 0.00 |
| ATOM | 113 | CB   | THRM | 7 | -3.000 | -3.843 | -0.737 | 1.00 | 0.00 |
| ATOM | 114 | HB   | THRM | 7 | -3.458 | -2.831 | -0.739 | 1.00 | 0.00 |
| ATOM | 115 | QG2  | THRM | 7 | -1.836 | -3.992 | -2.308 | 1.00 | 0.00 |
| ATOM | 116 | OG1  | THRM | 7 | -4.024 | -4.805 | -0.958 | 1.00 | 0.00 |
| ATOM | 117 | 1HG  | THRM | 7 | -3.579 | -5.654 | -1.041 | 1.00 | 0.00 |
| ATOM | 118 | CG2  | THRM | 7 | -2.084 | -3.963 | -1.974 | 1.00 | 0.00 |
| ATOM | 119 | 1HG2 | THRM | 7 | -2.184 | -3.095 | -2.652 | 1.00 | 0.00 |
| ATOM | 120 | 2HG2 | THRM | 7 | -1.013 | -4.010 | -1.705 | 1.00 | 0.00 |
| ATOM | 121 | 3HG2 | THRM | 7 | -2.311 | -4.869 | -2.567 | 1.00 | 0.00 |
| ATOM | 122 | C    | THRM | 7 | -2.706 | -2.985 | 1.625  | 1.00 | 0.00 |
| ATOM | 123 | O    | THRM | 7 | -3.563 | -3.209 | 2.479  | 1.00 | 0.00 |
| ATOM | 124 | N    | VAL  | 8 | -2.075 | -1.829 | 1.481  | 1.00 | 0.00 |
| ATOM | 125 | H    | VAL  | 8 | -1.379 | -1.655 | 0.784  | 1.00 | 0.00 |

|      |     |      |      |    |        |        |       |      |      |
|------|-----|------|------|----|--------|--------|-------|------|------|
| ATOM | 126 | CA   | VAL  | 8  | -2.362 | -0.705 | 2.356 | 1.00 | 0.00 |
| ATOM | 127 | HA   | VAL  | 8  | -3.374 | -0.835 | 2.737 | 1.00 | 0.00 |
| ATOM | 128 | CB   | VAL  | 8  | -1.403 | -0.712 | 3.548 | 1.00 | 0.00 |
| ATOM | 129 | HB   | VAL  | 8  | -1.197 | 0.324  | 3.818 | 1.00 | 0.00 |
| ATOM | 130 | QG1  | VAL  | 8  | -2.190 | -1.559 | 5.047 | 1.00 | 0.00 |
| ATOM | 131 | QG2  | VAL  | 8  | 0.242  | -1.531 | 3.091 | 1.00 | 0.00 |
| ATOM | 132 | CG1  | VAL  | 8  | -2.039 | -1.397 | 4.759 | 1.00 | 0.00 |
| ATOM | 133 | 1HG1 | VAL  | 8  | -2.896 | -1.987 | 4.435 | 1.00 | 0.00 |
| ATOM | 134 | 2HG1 | VAL  | 8  | -1.306 | -2.051 | 5.234 | 1.00 | 0.00 |
| ATOM | 135 | 3HG1 | VAL  | 8  | -2.367 | -0.641 | 5.473 | 1.00 | 0.00 |
| ATOM | 136 | CG2  | VAL  | 8  | -0.074 | -1.375 | 3.179 | 1.00 | 0.00 |
| ATOM | 137 | 1HG2 | VAL  | 8  | 0.232  | -1.045 | 2.186 | 1.00 | 0.00 |
| ATOM | 138 | 2HG2 | VAL  | 8  | 0.688  | -1.091 | 3.906 | 1.00 | 0.00 |
| ATOM | 139 | 3HG2 | VAL  | 8  | -0.194 | -2.457 | 3.181 | 1.00 | 0.00 |
| ATOM | 140 | QQG  | VAL  | 8  | -0.974 | -1.545 | 4.069 | 1.00 | 0.00 |
| ATOM | 141 | C    | VAL  | 8  | -2.302 | 0.593  | 1.548 | 1.00 | 0.00 |
| ATOM | 142 | O    | VAL  | 8  | -1.897 | 0.642  | 0.380 | 1.00 | 0.00 |
| ATOM | 143 | N    | THRM | 9  | -2.717 | 1.669  | 2.190 | 1.00 | 0.00 |
| ATOM | 144 | QB   | THRM | 9  | -3.285 | 1.407  | 3.924 | 1.00 | 0.00 |
| ATOM | 145 | CN   | THRM | 9  | -3.174 | 1.459  | 3.582 | 1.00 | 0.00 |
| ATOM | 146 | 1HNB | THRM | 9  | -3.080 | 0.404  | 3.840 | 1.00 | 0.00 |
| ATOM | 147 | 2HNB | THRM | 9  | -2.560 | 2.053  | 4.260 | 1.00 | 0.00 |
| ATOM | 148 | 3HNB | THRM | 9  | -4.216 | 1.764  | 3.673 | 1.00 | 0.00 |
| ATOM | 149 | CA   | THRM | 9  | -2.726 | 2.988  | 1.564 | 1.00 | 0.00 |
| ATOM | 150 | HA   | THRM | 9  | -2.418 | 2.875  | 0.509 | 1.00 | 0.00 |
| ATOM | 151 | CB   | THRM | 9  | -4.164 | 3.607  | 1.606 | 1.00 | 0.00 |
| ATOM | 152 | HB   | THRM | 9  | -4.134 | 4.593  | 1.094 | 1.00 | 0.00 |
| ATOM | 153 | QG2  | THRM | 9  | -5.592 | 2.533  | 0.801 | 1.00 | 0.00 |
| ATOM | 154 | OG1  | THRM | 9  | -4.582 | 3.806  | 2.949 | 1.00 | 0.00 |
| ATOM | 155 | 1HG  | THRM | 9  | -5.147 | 4.584  | 2.941 | 1.00 | 0.00 |
| ATOM | 156 | CG2  | THRM | 9  | -5.290 | 2.763  | 0.971 | 1.00 | 0.00 |
| ATOM | 157 | 1HG2 | THRM | 9  | -4.905 | 2.053  | 0.217 | 1.00 | 0.00 |
| ATOM | 158 | 2HG2 | THRM | 9  | -5.828 | 2.147  | 1.717 | 1.00 | 0.00 |
| ATOM | 159 | 3HG2 | THRM | 9  | -6.045 | 3.398  | 0.469 | 1.00 | 0.00 |
| ATOM | 160 | C    | THRM | 9  | -1.730 | 3.909  | 2.228 | 1.00 | 0.00 |
| ATOM | 161 | O    | THRM | 9  | -2.079 | 4.854  | 2.906 | 1.00 | 0.00 |
| ATOM | 162 | N    | VALM | 10 | -0.456 | 3.624  | 2.028 | 1.00 | 0.00 |
| ATOM | 163 | QB   | VALM | 10 | -0.112 | 2.152  | 0.973 | 1.00 | 0.00 |
| ATOM | 164 | CN   | VALM | 10 | -0.181 | 2.442  | 1.181 | 1.00 | 0.00 |
| ATOM | 165 | 1HNB | VALM | 10 | -0.423 | 1.534  | 1.733 | 1.00 | 0.00 |
| ATOM | 166 | 2HNB | VALM | 10 | -0.789 | 2.492  | 0.279 | 1.00 | 0.00 |
| ATOM | 167 | 3HNB | VALM | 10 | 0.875  | 2.429  | 0.908 | 1.00 | 0.00 |
| ATOM | 168 | CA   | VALM | 10 | 0.617  | 4.427  | 2.608 | 1.00 | 0.00 |
| ATOM | 169 | HA   | VALM | 10 | 0.274  | 5.475  | 2.686 | 1.00 | 0.00 |
| ATOM | 170 | CB   | VALM | 10 | 0.974  | 3.885  | 4.048 | 1.00 | 0.00 |
| ATOM | 171 | HB   | VALM | 10 | 1.908  | 3.292  | 3.953 | 1.00 | 0.00 |
| ATOM | 172 | QG1  | VALM | 10 | 1.325  | 5.244  | 5.439 | 1.00 | 0.00 |
| ATOM | 173 | QG2  | VALM | 10 | -0.394 | 2.700  | 4.807 | 1.00 | 0.00 |
| ATOM | 174 | CG1  | VALM | 10 | 1.241  | 4.957  | 5.142 | 1.00 | 0.00 |
| ATOM | 175 | 1HG1 | VALM | 10 | 0.345  | 5.564  | 5.368 | 1.00 | 0.00 |
| ATOM | 176 | 2HG1 | VALM | 10 | 1.582  | 4.509  | 6.094 | 1.00 | 0.00 |
| ATOM | 177 | 3HG1 | VALM | 10 | 2.047  | 5.659  | 4.855 | 1.00 | 0.00 |
| ATOM | 178 | CG2  | VALM | 10 | -0.101 | 2.948  | 4.651 | 1.00 | 0.00 |
| ATOM | 179 | 1HG2 | VALM | 10 | 0.288  | 2.351  | 5.496 | 1.00 | 0.00 |
| ATOM | 180 | 2HG2 | VALM | 10 | -0.975 | 3.512  | 5.025 | 1.00 | 0.00 |
| ATOM | 181 | 3HG2 | VALM | 10 | -0.495 | 2.237  | 3.899 | 1.00 | 0.00 |
| ATOM | 182 | QQG  | VALM | 10 | 0.465  | 3.972  | 5.123 | 1.00 | 0.00 |
| ATOM | 183 | C    | VALM | 10 | 1.835  | 4.426  | 1.717 | 1.00 | 0.00 |
| ATOM | 184 | O    | VALM | 10 | 2.918  | 3.957  | 2.086 | 1.00 | 0.00 |

|      |     |      |      |    |        |       |        |      |      |
|------|-----|------|------|----|--------|-------|--------|------|------|
| ATOM | 185 | N    | ILEM | 11 | 1.676  | 4.957 | 0.518  | 1.00 | 0.00 |
| ATOM | 186 | QB   | ILEM | 11 | -0.007 | 5.607 | 0.140  | 1.00 | 0.00 |
| ATOM | 187 | CN   | ILEM | 11 | 0.325  | 5.480 | 0.214  | 1.00 | 0.00 |
| ATOM | 188 | 1HNB | ILEM | 11 | -0.327 | 5.325 | 1.074  | 1.00 | 0.00 |
| ATOM | 189 | 2HNB | ILEM | 11 | 0.388  | 6.544 | -0.007 | 1.00 | 0.00 |
| ATOM | 190 | 3HNB | ILEM | 11 | -0.082 | 4.953 | -0.649 | 1.00 | 0.00 |
| ATOM | 191 | CA   | ILEM | 11 | 2.767  | 5.025 | -0.449 | 1.00 | 0.00 |
| ATOM | 192 | HA   | ILEM | 11 | 2.426  | 5.650 | -1.295 | 1.00 | 0.00 |
| ATOM | 193 | CB   | ILEM | 11 | 4.054  | 5.698 | 0.180  | 1.00 | 0.00 |
| ATOM | 194 | HB   | ILEM | 11 | 3.865  | 5.787 | 1.270  | 1.00 | 0.00 |
| ATOM | 195 | QG2  | ILEM | 11 | 5.686  | 4.593 | -0.052 | 1.00 | 0.00 |
| ATOM | 196 | CG2  | ILEM | 11 | 5.340  | 4.835 | -0.006 | 1.00 | 0.00 |
| ATOM | 197 | 1HG2 | ILEM | 11 | 5.407  | 4.014 | 0.731  | 1.00 | 0.00 |
| ATOM | 198 | 2HG2 | ILEM | 11 | 5.387  | 4.327 | -0.985 | 1.00 | 0.00 |
| ATOM | 199 | 3HG2 | ILEM | 11 | 6.263  | 5.436 | 0.098  | 1.00 | 0.00 |
| ATOM | 200 | CG1  | ILEM | 11 | 4.357  | 7.139 | -0.342 | 1.00 | 0.00 |
| ATOM | 201 | 2HG1 | ILEM | 11 | 4.142  | 7.192 | -1.427 | 1.00 | 0.00 |
| ATOM | 202 | QG1  | ILEM | 11 | 4.142  | 7.192 | -1.427 | 1.00 | 0.00 |
| ATOM | 203 | QD1  | ILEM | 11 | 3.316  | 8.576 | 0.474  | 1.00 | 0.00 |
| ATOM | 204 | CD1  | ILEM | 11 | 3.539  | 8.276 | 0.304  | 1.00 | 0.00 |
| ATOM | 205 | 1HD1 | ILEM | 11 | 2.535  | 8.355 | -0.151 | 1.00 | 0.00 |
| ATOM | 206 | 2HD1 | ILEM | 11 | 3.393  | 8.110 | 1.388  | 1.00 | 0.00 |
| ATOM | 207 | 3HD1 | ILEM | 11 | 4.019  | 9.264 | 0.183  | 1.00 | 0.00 |
| ATOM | 208 | C    | ILEM | 11 | 3.070  | 3.660 | -1.020 | 1.00 | 0.00 |
| ATOM | 209 | O    | ILEM | 11 | 2.763  | 2.617 | -0.425 | 1.00 | 0.00 |
| ATOM | 210 | N    | PIPO | 12 | 3.680  | 3.645 | -2.190 | 1.00 | 0.00 |
| ATOM | 211 | CE   | PIPO | 12 | 4.037  | 2.416 | -2.866 | 1.00 | 0.00 |
| ATOM | 212 | CA   | PIPO | 12 | 4.060  | 4.862 | -2.890 | 1.00 | 0.00 |
| ATOM | 213 | HA   | PIPO | 12 | 4.586  | 5.556 | -2.234 | 1.00 | 0.00 |
| ATOM | 214 | CB   | PIPO | 12 | 4.989  | 4.566 | -4.081 | 1.00 | 0.00 |
| ATOM | 215 | 2HB  | PIPO | 12 | 5.251  | 5.500 | -4.579 | 1.00 | 0.00 |
| ATOM | 216 | 3HB  | PIPO | 12 | 5.897  | 4.079 | -3.722 | 1.00 | 0.00 |
| ATOM | 217 | QB   | PIPO | 12 | 5.574  | 4.790 | -4.151 | 1.00 | 0.00 |
| ATOM | 218 | CG   | PIPO | 12 | 4.270  | 3.639 | -5.077 | 1.00 | 0.00 |
| ATOM | 219 | 2HG  | PIPO | 12 | 4.928  | 3.428 | -5.920 | 1.00 | 0.00 |
| ATOM | 220 | 3HG  | PIPO | 12 | 3.362  | 4.124 | -5.437 | 1.00 | 0.00 |
| ATOM | 221 | QG   | PIPO | 12 | 4.145  | 3.776 | -5.679 | 1.00 | 0.00 |
| ATOM | 222 | CD   | PIPO | 12 | 3.873  | 2.598 | -4.385 | 1.00 | 0.00 |
| ATOM | 223 | 2HD  | PIPO | 12 | 4.141  | 1.673 | -4.895 | 1.00 | 0.00 |
| ATOM | 224 | 3HD  | PIPO | 12 | 2.836  | 2.849 | -4.612 | 1.00 | 0.00 |
| ATOM | 225 | QD   | PIPO | 12 | 3.489  | 2.261 | -4.753 | 1.00 | 0.00 |
| ATOM | 226 | 1HE  | PIPO | 12 | 5.073  | 2.165 | -2.640 | 1.00 | 0.00 |
| ATOM | 227 | 2HE  | PIPO | 12 | 3.387  | 1.611 | -2.524 | 1.00 | 0.00 |
| ATOM | 228 | QE   | PIPO | 12 | 4.230  | 1.888 | -2.582 | 1.00 | 0.00 |
| ATOM | 229 | C    | PIPO | 12 | 2.832  | 5.603 | -3.445 | 1.00 | 0.00 |
| ATOM | 230 | O    | PIPO | 12 | 2.710  | 6.805 | -3.178 | 1.00 | 0.00 |
| ATOM | 231 | O1'  | PHEO | 13 | 1.951  | 4.960 | -4.188 | 1.00 | 0.00 |
| ATOM | 232 | CA   | PHEO | 13 | 0.543  | 5.345 | -4.227 | 1.00 | 0.00 |
| ATOM | 233 | HA   | PHEO | 13 | 0.394  | 6.162 | -4.958 | 1.00 | 0.00 |
| ATOM | 234 | CB   | PHEO | 13 | 0.108  | 5.815 | -2.806 | 1.00 | 0.00 |
| ATOM | 235 | 2HB  | PHEO | 13 | 0.935  | 5.638 | -2.091 | 1.00 | 0.00 |
| ATOM | 236 | QB   | PHEO | 13 | 0.935  | 5.638 | -2.091 | 1.00 | 0.00 |
| ATOM | 237 | QD   | PHEO | 13 | -0.365 | 7.447 | -2.643 | 1.00 | 0.00 |
| ATOM | 238 | QE   | PHEO | 13 | -0.975 | 9.816 | -2.368 | 1.00 | 0.00 |
| ATOM | 239 | QR   | PHEO | 13 | -0.792 | 9.107 | -2.451 | 1.00 | 0.00 |
| ATOM | 240 | CG   | PHEO | 13 | -0.338 | 7.280 | -2.677 | 1.00 | 0.00 |
| ATOM | 241 | CD1  | PHEO | 13 | 0.310  | 8.268 | -3.428 | 1.00 | 0.00 |
| ATOM | 242 | 1HD  | PHEO | 13 | 1.106  | 8.000 | -4.109 | 1.00 | 0.00 |
| ATOM | 243 | CE1  | PHEO | 13 | -0.028 | 9.608 | -3.263 | 1.00 | 0.00 |

Supplementary Material for Organic & Biomolecular Chemistry  
 This journal is © The Royal Society of Chemistry 2006

|          |     |      |      |    |        |        |        |      |      |
|----------|-----|------|------|----|--------|--------|--------|------|------|
| ATOM     | 244 | 1HE  | PHEO | 13 | 0.499  | 10.366 | -3.826 | 1.00 | 0.00 |
| ATOM     | 245 | CZ   | PHEO | 13 | -1.025 | 9.967  | -2.359 | 1.00 | 0.00 |
| ATOM     | 246 | HZ   | PHEO | 13 | -1.280 | 11.007 | -2.229 | 1.00 | 0.00 |
| ATOM     | 247 | CE2  | PHEO | 13 | -1.680 | 8.987  | -1.617 | 1.00 | 0.00 |
| ATOM     | 248 | 2HE  | PHEO | 13 | -2.449 | 9.266  | -0.911 | 1.00 | 0.00 |
| ATOM     | 249 | CD2  | PHEO | 13 | -1.338 | 7.647  | -1.773 | 1.00 | 0.00 |
| ATOM     | 250 | 2HD  | PHEO | 13 | -1.835 | 6.895  | -1.178 | 1.00 | 0.00 |
| ATOM     | 251 | C    | PHEO | 13 | -0.327 | 4.175  | -4.620 | 1.00 | 0.00 |
| ATOM     | 252 | O    | PHEO | 13 | -1.516 | 4.058  | -4.208 | 1.00 | 0.00 |
| TER      |     |      |      |    |        |        |        |      |      |
| ENDMDL   |     |      |      |    |        |        |        |      |      |
| MODEL 17 |     |      |      |    |        |        |        |      |      |
| ATOM     | 1   | N    | VALM | 1  | 0.202  | 3.145  | -5.181 | 1.00 | 0.00 |
| ATOM     | 2   | QB   | VALM | 1  | 1.378  | 3.099  | -6.600 | 1.00 | 0.00 |
| ATOM     | 3   | CN   | VALM | 1  | 1.146  | 3.108  | -6.320 | 1.00 | 0.00 |
| ATOM     | 4   | 1HNB | VALM | 1  | 2.164  | 3.245  | -5.954 | 1.00 | 0.00 |
| ATOM     | 5   | 2HNB | VALM | 1  | 1.068  | 2.145  | -6.826 | 1.00 | 0.00 |
| ATOM     | 6   | 3HNB | VALM | 1  | 0.902  | 3.907  | -7.021 | 1.00 | 0.00 |
| ATOM     | 7   | CA   | VALM | 1  | -0.198 | 1.935  | -4.468 | 1.00 | 0.00 |
| ATOM     | 8   | HA   | VALM | 1  | -1.217 | 2.081  | -4.064 | 1.00 | 0.00 |
| ATOM     | 9   | CB   | VALM | 1  | -0.200 | 0.705  | -5.459 | 1.00 | 0.00 |
| ATOM     | 10  | HB   | VALM | 1  | -0.045 | 1.108  | -6.482 | 1.00 | 0.00 |
| ATOM     | 11  | QG1  | VALM | 1  | 1.212  | -0.646 | -5.168 | 1.00 | 0.00 |
| ATOM     | 12  | QG2  | VALM | 1  | -1.885 | -0.299 | -5.488 | 1.00 | 0.00 |
| ATOM     | 13  | CG1  | VALM | 1  | 0.907  | -0.363 | -5.235 | 1.00 | 0.00 |
| ATOM     | 14  | 1HG1 | VALM | 1  | 0.712  | -1.298 | -5.793 | 1.00 | 0.00 |
| ATOM     | 15  | 2HG1 | VALM | 1  | 1.907  | -0.002 | -5.541 | 1.00 | 0.00 |
| ATOM     | 16  | 3HG1 | VALM | 1  | 1.019  | -0.638 | -4.169 | 1.00 | 0.00 |
| ATOM     | 17  | CG2  | VALM | 1  | -1.531 | -0.085 | -5.477 | 1.00 | 0.00 |
| ATOM     | 18  | 1HG2 | VALM | 1  | -2.218 | 0.234  | -4.671 | 1.00 | 0.00 |
| ATOM     | 19  | 2HG2 | VALM | 1  | -2.070 | 0.040  | -6.434 | 1.00 | 0.00 |
| ATOM     | 20  | 3HG2 | VALM | 1  | -1.365 | -1.172 | -5.359 | 1.00 | 0.00 |
| ATOM     | 21  | QQG  | VALM | 1  | -0.336 | -0.473 | -5.328 | 1.00 | 0.00 |
| ATOM     | 22  | C    | VALM | 1  | 0.711  | 1.675  | -3.291 | 1.00 | 0.00 |
| ATOM     | 23  | O    | VALM | 1  | 1.706  | 2.379  | -3.127 | 1.00 | 0.00 |
| ATOM     | 24  | N    | PRO  | 2  | 0.348  | 0.651  | -2.473 | 1.00 | 0.00 |
| ATOM     | 25  | CD   | PRO  | 2  | -0.824 | -0.204 | -2.635 | 1.00 | 0.00 |
| ATOM     | 26  | CA   | PRO  | 2  | 1.146  | 0.306  | -1.308 | 1.00 | 0.00 |
| ATOM     | 27  | HA   | PRO  | 2  | 1.443  | 1.134  | -0.833 | 1.00 | 0.00 |
| ATOM     | 28  | CB   | PRO  | 2  | 0.227  | -0.540 | -0.441 | 1.00 | 0.00 |
| ATOM     | 29  | 2HB  | PRO  | 2  | -0.176 | 0.043  | 0.386  | 1.00 | 0.00 |
| ATOM     | 30  | QB   | PRO  | 2  | -0.176 | 0.043  | 0.386  | 1.00 | 0.00 |
| ATOM     | 31  | CG   | PRO  | 2  | -0.883 | -1.026 | -1.359 | 1.00 | 0.00 |
| ATOM     | 32  | 2HG  | PRO  | 2  | -1.854 | -0.912 | -0.876 | 1.00 | 0.00 |
| ATOM     | 33  | QG   | PRO  | 2  | -1.854 | -0.912 | -0.876 | 1.00 | 0.00 |
| ATOM     | 34  | 2HD  | PRO  | 2  | -1.730 | 0.388  | -2.769 | 1.00 | 0.00 |
| ATOM     | 35  | QD   | PRO  | 2  | -1.730 | 0.388  | -2.769 | 1.00 | 0.00 |
| ATOM     | 36  | C    | PRO  | 2  | 2.425  | -0.426 | -1.715 | 1.00 | 0.00 |
| ATOM     | 37  | O    | PRO  | 2  | 2.483  | -1.037 | -2.782 | 1.00 | 0.00 |
| ATOM     | 38  | N    | ILE  | 3  | 3.421  | -0.340 | -0.845 | 1.00 | 0.00 |
| ATOM     | 39  | H    | ILE  | 3  | 3.366  | 0.159  | 0.020  | 1.00 | 0.00 |
| ATOM     | 40  | CA   | ILE  | 3  | 4.697  | -0.986 | -1.101 | 1.00 | 0.00 |
| ATOM     | 41  | HA   | ILE  | 3  | 4.746  | -1.200 | -2.169 | 1.00 | 0.00 |
| ATOM     | 42  | CB   | ILE  | 3  | 5.853  | -0.038 | -0.776 | 1.00 | 0.00 |
| ATOM     | 43  | HB   | ILE  | 3  | 6.526  | -0.544 | -0.086 | 1.00 | 0.00 |
| ATOM     | 44  | QG2  | ILE  | 3  | 6.851  | 0.373  | -2.331 | 1.00 | 0.00 |
| ATOM     | 45  | CG2  | ILE  | 3  | 6.660  | 0.294  | -2.033 | 1.00 | 0.00 |
| ATOM     | 46  | 1HG2 | ILE  | 3  | 7.068  | 1.301  | -1.947 | 1.00 | 0.00 |
| ATOM     | 47  | 2HG2 | ILE  | 3  | 7.475  | -0.422 | -2.140 | 1.00 | 0.00 |

|      |     |      |      |   |        |        |        |      |      |
|------|-----|------|------|---|--------|--------|--------|------|------|
| ATOM | 48  | 3HG2 | ILE  | 3 | 6.010  | 0.239  | -2.907 | 1.00 | 0.00 |
| ATOM | 49  | CG1  | ILE  | 3 | 5.346  | 1.223  | -0.071 | 1.00 | 0.00 |
| ATOM | 50  | 2HG1 | ILE  | 3 | 4.426  | 1.564  | -0.545 | 1.00 | 0.00 |
| ATOM | 51  | QG1  | ILE  | 3 | 4.426  | 1.564  | -0.545 | 1.00 | 0.00 |
| ATOM | 52  | QD1  | ILE  | 3 | 5.032  | 0.892  | 1.767  | 1.00 | 0.00 |
| ATOM | 53  | CD1  | ILE  | 3 | 5.092  | 0.956  | 1.414  | 1.00 | 0.00 |
| ATOM | 54  | 1HD1 | ILE  | 3 | 5.606  | 1.708  | 2.011  | 1.00 | 0.00 |
| ATOM | 55  | 2HD1 | ILE  | 3 | 4.022  | 1.001  | 1.614  | 1.00 | 0.00 |
| ATOM | 56  | 3HD1 | ILE  | 3 | 5.469  | -0.034 | 1.674  | 1.00 | 0.00 |
| ATOM | 57  | C    | ILE  | 3 | 4.755  | -2.310 | -0.338 | 1.00 | 0.00 |
| ATOM | 58  | O    | ILE  | 3 | 5.279  | -3.334 | -0.801 | 1.00 | 0.00 |
| ATOM | 59  | N    | PIP  | 4 | 4.203  | -2.288 | 0.862  | 1.00 | 0.00 |
| ATOM | 60  | CE   | PIP  | 4 | 3.590  | -1.100 | 1.413  | 1.00 | 0.00 |
| ATOM | 61  | CA   | PIP  | 4 | 4.181  | -3.453 | 1.734  | 1.00 | 0.00 |
| ATOM | 62  | HA   | PIP  | 4 | 5.167  | -3.912 | 1.814  | 1.00 | 0.00 |
| ATOM | 63  | CB   | PIP  | 4 | 3.732  | -3.084 | 3.160  | 1.00 | 0.00 |
| ATOM | 64  | 2HB  | PIP  | 4 | 3.729  | -3.979 | 3.783  | 1.00 | 0.00 |
| ATOM | 65  | 3HB  | PIP  | 4 | 4.421  | -2.352 | 3.581  | 1.00 | 0.00 |
| ATOM | 66  | QB   | PIP  | 4 | 4.075  | -3.165 | 3.682  | 1.00 | 0.00 |
| ATOM | 67  | CG   | PIP  | 4 | 2.314  | -2.486 | 3.114  | 1.00 | 0.00 |
| ATOM | 68  | 2HG  | PIP  | 4 | 1.996  | -2.225 | 4.124  | 1.00 | 0.00 |
| ATOM | 69  | 3HG  | PIP  | 4 | 1.625  | -3.217 | 2.694  | 1.00 | 0.00 |
| ATOM | 70  | QG   | PIP  | 4 | 1.810  | -2.721 | 3.409  | 1.00 | 0.00 |
| ATOM | 71  | CD   | PIP  | 4 | 2.362  | -1.499 | 2.254  | 1.00 | 0.00 |
| ATOM | 72  | 2HD  | PIP  | 4 | 1.900  | -0.604 | 2.669  | 1.00 | 0.00 |
| ATOM | 73  | 3HD  | PIP  | 4 | 1.642  | -2.019 | 1.622  | 1.00 | 0.00 |
| ATOM | 74  | QD   | PIP  | 4 | 1.771  | -1.311 | 2.146  | 1.00 | 0.00 |
| ATOM | 75  | 1HE  | PIP  | 4 | 4.309  | -0.579 | 2.045  | 1.00 | 0.00 |
| ATOM | 76  | 2HE  | PIP  | 4 | 3.276  | -0.443 | 0.602  | 1.00 | 0.00 |
| ATOM | 77  | QE   | PIP  | 4 | 3.792  | -0.511 | 1.323  | 1.00 | 0.00 |
| ATOM | 78  | C    | PIP  | 4 | 3.216  | -4.531 | 1.217  | 1.00 | 0.00 |
| ATOM | 79  | O    | PIP  | 4 | 2.592  | -4.238 | 0.197  | 1.00 | 0.00 |
| ATOM | 80  | N    | ALA  | 5 | 3.106  | -5.686 | 1.857  | 1.00 | 0.00 |
| ATOM | 81  | H    | ALA  | 5 | 3.617  | -5.917 | 2.685  | 1.00 | 0.00 |
| ATOM | 82  | CA   | ALA  | 5 | 2.207  | -6.723 | 1.381  | 1.00 | 0.00 |
| ATOM | 83  | HA   | ALA  | 5 | 2.675  | -7.198 | 0.519  | 1.00 | 0.00 |
| ATOM | 84  | QB   | ALA  | 5 | 1.967  | -8.022 | 2.737  | 1.00 | 0.00 |
| ATOM | 85  | CB   | ALA  | 5 | 2.013  | -7.773 | 2.477  | 1.00 | 0.00 |
| ATOM | 86  | 1HB  | ALA  | 5 | 0.964  | -8.067 | 2.517  | 1.00 | 0.00 |
| ATOM | 87  | 2HB  | ALA  | 5 | 2.627  | -8.646 | 2.256  | 1.00 | 0.00 |
| ATOM | 88  | 3HB  | ALA  | 5 | 2.310  | -7.353 | 3.438  | 1.00 | 0.00 |
| ATOM | 89  | C    | ALA  | 5 | 0.888  | -6.086 | 0.943  | 1.00 | 0.00 |
| ATOM | 90  | O    | ALA  | 5 | 0.524  | -5.012 | 1.418  | 1.00 | 0.00 |
| ATOM | 91  | N    | PRO  | 6 | 0.186  | -6.794 | 0.018  | 1.00 | 0.00 |
| ATOM | 92  | CD   | PRO  | 6 | 0.585  | -8.070 | -0.569 | 1.00 | 0.00 |
| ATOM | 93  | CA   | PRO  | 6 | -1.086 | -6.310 | -0.490 | 1.00 | 0.00 |
| ATOM | 94  | HA   | PRO  | 6 | -1.039 | -5.326 | -0.664 | 1.00 | 0.00 |
| ATOM | 95  | CB   | PRO  | 6 | -1.326 | -7.097 | -1.768 | 1.00 | 0.00 |
| ATOM | 96  | 2HB  | PRO  | 6 | -1.093 | -6.495 | -2.647 | 1.00 | 0.00 |
| ATOM | 97  | QB   | PRO  | 6 | -1.093 | -6.495 | -2.647 | 1.00 | 0.00 |
| ATOM | 98  | CG   | PRO  | 6 | -0.419 | -8.313 | -1.684 | 1.00 | 0.00 |
| ATOM | 99  | 2HG  | PRO  | 6 | 0.096  | -8.472 | -2.632 | 1.00 | 0.00 |
| ATOM | 100 | QG   | PRO  | 6 | 0.096  | -8.472 | -2.632 | 1.00 | 0.00 |
| ATOM | 101 | 2HD  | PRO  | 6 | 1.604  | -8.029 | -0.954 | 1.00 | 0.00 |
| ATOM | 102 | QD   | PRO  | 6 | 1.604  | -8.029 | -0.954 | 1.00 | 0.00 |
| ATOM | 103 | C    | PRO  | 6 | -2.197 | -6.498 | 0.545  | 1.00 | 0.00 |
| ATOM | 104 | O    | PRO  | 6 | -2.622 | -7.609 | 0.883  | 1.00 | 0.00 |
| ATOM | 105 | N    | THRM | 7 | -2.675 | -5.380 | 1.059  | 1.00 | 0.00 |
| ATOM | 106 | QB   | THRM | 7 | -4.015 | -5.575 | 2.310  | 1.00 | 0.00 |

|      |     |      |      |    |        |        |        |      |      |
|------|-----|------|------|----|--------|--------|--------|------|------|
| ATOM | 107 | CN   | THRM | 7  | -3.751 | -5.536 | 2.063  | 1.00 | 0.00 |
| ATOM | 108 | 1HNB | THRM | 7  | -3.965 | -6.596 | 2.205  | 1.00 | 0.00 |
| ATOM | 109 | 2HNB | THRM | 7  | -3.431 | -5.101 | 3.009  | 1.00 | 0.00 |
| ATOM | 110 | 3HNB | THRM | 7  | -4.650 | -5.027 | 1.716  | 1.00 | 0.00 |
| ATOM | 111 | CA   | THRM | 7  | -2.173 | -4.069 | 0.661  | 1.00 | 0.00 |
| ATOM | 112 | HA   | THRM | 7  | -1.081 | -4.145 | 0.507  | 1.00 | 0.00 |
| ATOM | 113 | CB   | THRM | 7  | -2.838 | -3.608 | -0.680 | 1.00 | 0.00 |
| ATOM | 114 | HB   | THRM | 7  | -2.046 | -3.529 | -1.455 | 1.00 | 0.00 |
| ATOM | 115 | QG2  | THRM | 7  | -4.272 | -4.749 | -1.377 | 1.00 | 0.00 |
| ATOM | 116 | OG1  | THRM | 7  | -3.448 | -2.333 | -0.522 | 1.00 | 0.00 |
| ATOM | 117 | 1HG  | THRM | 7  | -3.558 | -1.978 | -1.409 | 1.00 | 0.00 |
| ATOM | 118 | CG2  | THRM | 7  | -3.967 | -4.509 | -1.229 | 1.00 | 0.00 |
| ATOM | 119 | 1HG2 | THRM | 7  | -4.916 | -4.367 | -0.681 | 1.00 | 0.00 |
| ATOM | 120 | 2HG2 | THRM | 7  | -4.197 | -4.298 | -2.290 | 1.00 | 0.00 |
| ATOM | 121 | 3HG2 | THRM | 7  | -3.704 | -5.581 | -1.160 | 1.00 | 0.00 |
| ATOM | 122 | C    | THRM | 7  | -2.404 | -3.048 | 1.749  | 1.00 | 0.00 |
| ATOM | 123 | O    | THRM | 7  | -3.060 | -3.358 | 2.743  | 1.00 | 0.00 |
| ATOM | 124 | N    | VAL  | 8  | -1.867 | -1.853 | 1.548  | 1.00 | 0.00 |
| ATOM | 125 | H    | VAL  | 8  | -1.335 | -1.608 | 0.738  | 1.00 | 0.00 |
| ATOM | 126 | CA   | VAL  | 8  | -2.021 | -0.789 | 2.526  | 1.00 | 0.00 |
| ATOM | 127 | HA   | VAL  | 8  | -2.948 | -0.973 | 3.069  | 1.00 | 0.00 |
| ATOM | 128 | CB   | VAL  | 8  | -0.867 | -0.828 | 3.529  | 1.00 | 0.00 |
| ATOM | 129 | HB   | VAL  | 8  | -0.202 | -1.642 | 3.243  | 1.00 | 0.00 |
| ATOM | 130 | QG1  | VAL  | 8  | 0.128  | 0.781  | 3.482  | 1.00 | 0.00 |
| ATOM | 131 | QG2  | VAL  | 8  | -1.501 | -1.183 | 5.278  | 1.00 | 0.00 |
| ATOM | 132 | CG1  | VAL  | 8  | -0.062 | 0.472  | 3.491  | 1.00 | 0.00 |
| ATOM | 133 | 1HG1 | VAL  | 8  | 0.665  | 0.474  | 4.303  | 1.00 | 0.00 |
| ATOM | 134 | 2HG1 | VAL  | 8  | 0.457  | 0.550  | 2.536  | 1.00 | 0.00 |
| ATOM | 135 | 3HG1 | VAL  | 8  | -0.738 | 1.321  | 3.607  | 1.00 | 0.00 |
| ATOM | 136 | CG2  | VAL  | 8  | -1.380 | -1.115 | 4.942  | 1.00 | 0.00 |
| ATOM | 137 | 1HG2 | VAL  | 8  | -0.697 | -1.801 | 5.444  | 1.00 | 0.00 |
| ATOM | 138 | 2HG2 | VAL  | 8  | -1.436 | -0.183 | 5.504  | 1.00 | 0.00 |
| ATOM | 139 | 3HG2 | VAL  | 8  | -2.371 | -1.565 | 4.885  | 1.00 | 0.00 |
| ATOM | 140 | QQG  | VAL  | 8  | -0.687 | -0.201 | 4.380  | 1.00 | 0.00 |
| ATOM | 141 | C    | VAL  | 8  | -2.136 | 0.553  | 1.799  | 1.00 | 0.00 |
| ATOM | 142 | O    | VAL  | 8  | -1.823 | 0.705  | 0.612  | 1.00 | 0.00 |
| ATOM | 143 | N    | THRM | 9  | -2.597 | 1.548  | 2.533  | 1.00 | 0.00 |
| ATOM | 144 | QB   | THRM | 9  | -3.012 | 1.136  | 4.282  | 1.00 | 0.00 |
| ATOM | 145 | CN   | THRM | 9  | -2.931 | 1.218  | 3.937  | 1.00 | 0.00 |
| ATOM | 146 | 1HNB | THRM | 9  | -2.726 | 0.163  | 4.121  | 1.00 | 0.00 |
| ATOM | 147 | 2HNB | THRM | 9  | -2.324 | 1.827  | 4.607  | 1.00 | 0.00 |
| ATOM | 148 | 3HNB | THRM | 9  | -3.987 | 1.419  | 4.117  | 1.00 | 0.00 |
| ATOM | 149 | CA   | THRM | 9  | -2.768 | 2.894  | 1.994  | 1.00 | 0.00 |
| ATOM | 150 | HA   | THRM | 9  | -2.603 | 2.854  | 0.901  | 1.00 | 0.00 |
| ATOM | 151 | CB   | THRM | 9  | -4.220 | 3.414  | 2.265  | 1.00 | 0.00 |
| ATOM | 152 | HB   | THRM | 9  | -4.324 | 4.418  | 1.798  | 1.00 | 0.00 |
| ATOM | 153 | QG2  | THRM | 9  | -5.687 | 2.283  | 1.624  | 1.00 | 0.00 |
| ATOM | 154 | OG1  | THRM | 9  | -4.451 | 3.538  | 3.662  | 1.00 | 0.00 |
| ATOM | 155 | 1HG  | THRM | 9  | -4.372 | 4.475  | 3.864  | 1.00 | 0.00 |
| ATOM | 156 | CG2  | THRM | 9  | -5.374 | 2.522  | 1.760  | 1.00 | 0.00 |
| ATOM | 157 | 1HG2 | THRM | 9  | -6.121 | 2.322  | 2.549  | 1.00 | 0.00 |
| ATOM | 158 | 2HG2 | THRM | 9  | -5.933 | 2.986  | 0.926  | 1.00 | 0.00 |
| ATOM | 159 | 3HG2 | THRM | 9  | -5.007 | 1.542  | 1.398  | 1.00 | 0.00 |
| ATOM | 160 | C    | THRM | 9  | -1.745 | 3.842  | 2.570  | 1.00 | 0.00 |
| ATOM | 161 | O    | THRM | 9  | -2.027 | 4.647  | 3.435  | 1.00 | 0.00 |
| ATOM | 162 | N    | VALM | 10 | -0.523 | 3.744  | 2.078  | 1.00 | 0.00 |
| ATOM | 163 | QB   | VALM | 10 | -0.278 | 2.465  | 0.773  | 1.00 | 0.00 |
| ATOM | 164 | CN   | VALM | 10 | -0.326 | 2.717  | 1.030  | 1.00 | 0.00 |
| ATOM | 165 | 1HNB | VALM | 10 | -1.123 | 2.795  | 0.291  | 1.00 | 0.00 |

|      |     |      |      |    |        |       |        |      |      |
|------|-----|------|------|----|--------|-------|--------|------|------|
| ATOM | 166 | 2HNB | VALM | 10 | 0.637  | 2.873 | 0.545  | 1.00 | 0.00 |
| ATOM | 167 | 3HNB | VALM | 10 | -0.349 | 1.726 | 1.484  | 1.00 | 0.00 |
| ATOM | 168 | CA   | VALM | 10 | 0.568  | 4.596 | 2.541  | 1.00 | 0.00 |
| ATOM | 169 | HA   | VALM | 10 | 0.205  | 5.638 | 2.601  | 1.00 | 0.00 |
| ATOM | 170 | CB   | VALM | 10 | 1.046  | 4.127 | 3.972  | 1.00 | 0.00 |
| ATOM | 171 | HB   | VALM | 10 | 1.583  | 3.163 | 3.839  | 1.00 | 0.00 |
| ATOM | 172 | QG1  | VALM | 10 | 2.298  | 5.326 | 4.920  | 1.00 | 0.00 |
| ATOM | 173 | QG2  | VALM | 10 | -0.419 | 3.794 | 5.234  | 1.00 | 0.00 |
| ATOM | 174 | CG1  | VALM | 10 | 2.024  | 5.075 | 4.719  | 1.00 | 0.00 |
| ATOM | 175 | 1HG1 | VALM | 10 | 1.524  | 5.986 | 5.099  | 1.00 | 0.00 |
| ATOM | 176 | 2HG1 | VALM | 10 | 2.508  | 4.583 | 5.584  | 1.00 | 0.00 |
| ATOM | 177 | 3HG1 | VALM | 10 | 2.862  | 5.409 | 4.077  | 1.00 | 0.00 |
| ATOM | 178 | CG2  | VALM | 10 | -0.112 | 3.870 | 4.967  | 1.00 | 0.00 |
| ATOM | 179 | 1HG2 | VALM | 10 | -0.714 | 4.778 | 5.154  | 1.00 | 0.00 |
| ATOM | 180 | 2HG2 | VALM | 10 | -0.804 | 3.089 | 4.601  | 1.00 | 0.00 |
| ATOM | 181 | 3HG2 | VALM | 10 | 0.260  | 3.514 | 5.947  | 1.00 | 0.00 |
| ATOM | 182 | QQG  | VALM | 10 | 0.939  | 4.560 | 5.077  | 1.00 | 0.00 |
| ATOM | 183 | C    | VALM | 10 | 1.717  | 4.584 | 1.561  | 1.00 | 0.00 |
| ATOM | 184 | O    | VALM | 10 | 2.808  | 4.069 | 1.836  | 1.00 | 0.00 |
| ATOM | 185 | N    | ILEM | 11 | 1.487  | 5.157 | 0.395  | 1.00 | 0.00 |
| ATOM | 186 | QB   | ILEM | 11 | -0.196 | 5.873 | 0.163  | 1.00 | 0.00 |
| ATOM | 187 | CN   | ILEM | 11 | 0.136  | 5.732 | 0.208  | 1.00 | 0.00 |
| ATOM | 188 | 1HNB | ILEM | 11 | -0.455 | 5.571 | 1.110  | 1.00 | 0.00 |
| ATOM | 189 | 2HNB | ILEM | 11 | 0.219  | 6.801 | 0.014  | 1.00 | 0.00 |
| ATOM | 190 | 3HNB | ILEM | 11 | -0.352 | 5.247 | -0.636 | 1.00 | 0.00 |
| ATOM | 191 | CA   | ILEM | 11 | 2.505  | 5.220 | -0.650 | 1.00 | 0.00 |
| ATOM | 192 | HA   | ILEM | 11 | 2.034  | 5.654 | -1.551 | 1.00 | 0.00 |
| ATOM | 193 | CB   | ILEM | 11 | 3.712  | 6.152 | -0.223 | 1.00 | 0.00 |
| ATOM | 194 | HB   | ILEM | 11 | 4.640  | 5.567 | -0.395 | 1.00 | 0.00 |
| ATOM | 195 | QG2  | ILEM | 11 | 3.838  | 7.808 | -1.308 | 1.00 | 0.00 |
| ATOM | 196 | CG2  | ILEM | 11 | 3.808  | 7.450 | -1.081 | 1.00 | 0.00 |
| ATOM | 197 | 1HG2 | ILEM | 11 | 3.820  | 8.365 | -0.462 | 1.00 | 0.00 |
| ATOM | 198 | 2HG2 | ILEM | 11 | 4.736  | 7.511 | -1.677 | 1.00 | 0.00 |
| ATOM | 199 | 3HG2 | ILEM | 11 | 2.959  | 7.548 | -1.785 | 1.00 | 0.00 |
| ATOM | 200 | CG1  | ILEM | 11 | 3.714  | 6.565 | 1.284  | 1.00 | 0.00 |
| ATOM | 201 | 2HG1 | ILEM | 11 | 4.541  | 7.276 | 1.471  | 1.00 | 0.00 |
| ATOM | 202 | QG1  | ILEM | 11 | 4.541  | 7.276 | 1.471  | 1.00 | 0.00 |
| ATOM | 203 | QD1  | ILEM | 11 | 2.095  | 7.444 | 1.933  | 1.00 | 0.00 |
| ATOM | 204 | CD1  | ILEM | 11 | 2.436  | 7.263 | 1.792  | 1.00 | 0.00 |
| ATOM | 205 | 1HD1 | ILEM | 11 | 1.936  | 6.662 | 2.573  | 1.00 | 0.00 |
| ATOM | 206 | 2HD1 | ILEM | 11 | 2.658  | 8.252 | 2.236  | 1.00 | 0.00 |
| ATOM | 207 | 3HD1 | ILEM | 11 | 1.692  | 7.419 | 0.991  | 1.00 | 0.00 |
| ATOM | 208 | C    | ILEM | 11 | 2.972  | 3.837 | -1.035 | 1.00 | 0.00 |
| ATOM | 209 | O    | ILEM | 11 | 2.720  | 2.841 | -0.341 | 1.00 | 0.00 |
| ATOM | 210 | N    | PIPO | 12 | 3.665  | 3.751 | -2.155 | 1.00 | 0.00 |
| ATOM | 211 | CE   | PIPO | 12 | 4.181  | 2.495 | -2.656 | 1.00 | 0.00 |
| ATOM | 212 | CA   | PIPO | 12 | 3.982  | 4.914 | -2.970 | 1.00 | 0.00 |
| ATOM | 213 | HA   | PIPO | 12 | 4.393  | 5.725 | -2.370 | 1.00 | 0.00 |
| ATOM | 214 | CB   | PIPO | 12 | 5.020  | 4.580 | -4.058 | 1.00 | 0.00 |
| ATOM | 215 | 2HB  | PIPO | 12 | 5.230  | 5.472 | -4.646 | 1.00 | 0.00 |
| ATOM | 216 | 3HB  | PIPO | 12 | 5.938  | 4.229 | -3.589 | 1.00 | 0.00 |
| ATOM | 217 | QB   | PIPO | 12 | 5.584  | 4.851 | -4.117 | 1.00 | 0.00 |
| ATOM | 218 | CG   | PIPO | 12 | 4.462  | 3.479 | -4.979 | 1.00 | 0.00 |
| ATOM | 219 | 2HG  | PIPO | 12 | 5.196  | 3.242 | -5.749 | 1.00 | 0.00 |
| ATOM | 220 | 3HG  | PIPO | 12 | 3.543  | 3.829 | -5.450 | 1.00 | 0.00 |
| ATOM | 221 | QG   | PIPO | 12 | 4.369  | 3.536 | -5.599 | 1.00 | 0.00 |
| ATOM | 222 | CD   | PIPO | 12 | 4.112  | 2.489 | -4.195 | 1.00 | 0.00 |
| ATOM | 223 | 2HD  | PIPO | 12 | 4.501  | 1.544 | -4.573 | 1.00 | 0.00 |
| ATOM | 224 | 3HD  | PIPO | 12 | 3.076  | 2.609 | -4.513 | 1.00 | 0.00 |



Supplementary Material for Organic & Biomolecular Chemistry  
 This journal is © The Royal Society of Chemistry 2006

|          |     |      |      |    |        |        |        |      |      |
|----------|-----|------|------|----|--------|--------|--------|------|------|
| ATOM     | 225 | OD   | PIPO | 12 | 3.789  | 2.076  | -4.543 | 1.00 | 0.00 |
| ATOM     | 226 | 1HE  | PIPO | 12 | 5.217  | 2.376  | -2.340 | 1.00 | 0.00 |
| ATOM     | 227 | 2HE  | PIPO | 12 | 3.584  | 1.673  | -2.263 | 1.00 | 0.00 |
| ATOM     | 228 | QE   | PIPO | 12 | 4.400  | 2.025  | -2.302 | 1.00 | 0.00 |
| ATOM     | 229 | C    | PIPO | 12 | 2.735  | 5.463  | -3.683 | 1.00 | 0.00 |
| ATOM     | 230 | O    | PIPO | 12 | 2.577  | 6.689  | -3.712 | 1.00 | 0.00 |
| ATOM     | 231 | O1'  | PHEO | 13 | 1.877  | 4.633  | -4.248 | 1.00 | 0.00 |
| ATOM     | 232 | CA   | PHEO | 13 | 0.466  | 4.970  | -4.409 | 1.00 | 0.00 |
| ATOM     | 233 | HA   | PHEO | 13 | 0.365  | 5.952  | -4.909 | 1.00 | 0.00 |
| ATOM     | 234 | CB   | PHEO | 13 | -0.206 | 5.017  | -3.003 | 1.00 | 0.00 |
| ATOM     | 235 | 2HB  | PHEO | 13 | 0.540  | 4.747  | -2.230 | 1.00 | 0.00 |
| ATOM     | 236 | QB   | PHEO | 13 | 0.540  | 4.747  | -2.230 | 1.00 | 0.00 |
| ATOM     | 237 | QD   | PHEO | 13 | -0.951 | 6.493  | -2.580 | 1.00 | 0.00 |
| ATOM     | 238 | QE   | PHEO | 13 | -2.088 | 8.604  | -2.025 | 1.00 | 0.00 |
| ATOM     | 239 | QR   | PHEO | 13 | -1.748 | 7.972  | -2.191 | 1.00 | 0.00 |
| ATOM     | 240 | CG   | PHEO | 13 | -0.861 | 6.348  | -2.602 | 1.00 | 0.00 |
| ATOM     | 241 | CD1  | PHEO | 13 | -2.039 | 6.339  | -1.846 | 1.00 | 0.00 |
| ATOM     | 242 | 1HD  | PHEO | 13 | -2.475 | 5.400  | -1.532 | 1.00 | 0.00 |
| ATOM     | 243 | CE1  | PHEO | 13 | -2.687 | 7.531  | -1.543 | 1.00 | 0.00 |
| ATOM     | 244 | 1HE  | PHEO | 13 | -3.612 | 7.511  | -0.985 | 1.00 | 0.00 |
| ATOM     | 245 | CZ   | PHEO | 13 | -2.154 | 8.742  | -1.979 | 1.00 | 0.00 |
| ATOM     | 246 | HZ   | PHEO | 13 | -2.662 | 9.665  | -1.747 | 1.00 | 0.00 |
| ATOM     | 247 | CE2  | PHEO | 13 | -0.974 | 8.759  | -2.721 | 1.00 | 0.00 |
| ATOM     | 248 | 2HE  | PHEO | 13 | -0.564 | 9.698  | -3.065 | 1.00 | 0.00 |
| ATOM     | 249 | CD2  | PHEO | 13 | -0.329 | 7.566  | -3.035 | 1.00 | 0.00 |
| ATOM     | 250 | 2HD  | PHEO | 13 | 0.573  | 7.585  | -3.629 | 1.00 | 0.00 |
| ATOM     | 251 | C    | PHEO | 13 | -0.249 | 3.928  | -5.235 | 1.00 | 0.00 |
| ATOM     | 252 | O    | PHEO | 13 | -1.445 | 4.077  | -5.612 | 1.00 | 0.00 |
| TER      |     |      |      |    |        |        |        |      |      |
| ENDMDL   |     |      |      |    |        |        |        |      |      |
| MODEL 18 |     |      |      |    |        |        |        |      |      |
| ATOM     | 1   | N    | VALM | 1  | -0.682 | 3.445  | -4.408 | 1.00 | 0.00 |
| ATOM     | 2   | QB   | VALM | 1  | -2.411 | 4.081  | -4.336 | 1.00 | 0.00 |
| ATOM     | 3   | CN   | VALM | 1  | -2.070 | 3.955  | -4.350 | 1.00 | 0.00 |
| ATOM     | 4   | 1HNB | VALM | 1  | -2.747 | 3.217  | -4.779 | 1.00 | 0.00 |
| ATOM     | 5   | 2HNB | VALM | 1  | -2.346 | 4.141  | -3.312 | 1.00 | 0.00 |
| ATOM     | 6   | 3HNB | VALM | 1  | -2.140 | 4.884  | -4.916 | 1.00 | 0.00 |
| ATOM     | 7   | CA   | VALM | 1  | -0.378 | 2.019  | -4.332 | 1.00 | 0.00 |
| ATOM     | 8   | HA   | VALM | 1  | -1.311 | 1.466  | -4.121 | 1.00 | 0.00 |
| ATOM     | 9   | CB   | VALM | 1  | 0.222  | 1.525  | -5.709 | 1.00 | 0.00 |
| ATOM     | 10  | HB   | VALM | 1  | 1.031  | 2.234  | -5.987 | 1.00 | 0.00 |
| ATOM     | 11  | QG1  | VALM | 1  | 1.023  | -0.281 | -5.724 | 1.00 | 0.00 |
| ATOM     | 12  | QG2  | VALM | 1  | -1.077 | 1.514  | -7.179 | 1.00 | 0.00 |
| ATOM     | 13  | CG1  | VALM | 1  | 0.858  | 0.108  | -5.715 | 1.00 | 0.00 |
| ATOM     | 14  | 1HG1 | VALM | 1  | 1.686  | 0.012  | -4.988 | 1.00 | 0.00 |
| ATOM     | 15  | 2HG1 | VALM | 1  | 0.122  | -0.684 | -5.478 | 1.00 | 0.00 |
| ATOM     | 16  | 3HG1 | VALM | 1  | 1.262  | -0.170 | -6.707 | 1.00 | 0.00 |
| ATOM     | 17  | CG2  | VALM | 1  | -0.799 | 1.519  | -6.872 | 1.00 | 0.00 |
| ATOM     | 18  | 1HG2 | VALM | 1  | -0.436 | 2.082  | -7.752 | 1.00 | 0.00 |
| ATOM     | 19  | 2HG2 | VALM | 1  | -1.029 | 0.494  | -7.213 | 1.00 | 0.00 |
| ATOM     | 20  | 3HG2 | VALM | 1  | -1.766 | 1.967  | -6.572 | 1.00 | 0.00 |
| ATOM     | 21  | QQG  | VALM | 1  | -0.027 | 0.617  | -6.452 | 1.00 | 0.00 |
| ATOM     | 22  | C    | VALM | 1  | 0.574  | 1.728  | -3.196 | 1.00 | 0.00 |
| ATOM     | 23  | O    | VALM | 1  | 1.556  | 2.450  | -3.030 | 1.00 | 0.00 |
| ATOM     | 24  | N    | PRO  | 2  | 0.265  | 0.657  | -2.420 | 1.00 | 0.00 |
| ATOM     | 25  | CD   | PRO  | 2  | -0.890 | -0.221 | -2.587 | 1.00 | 0.00 |
| ATOM     | 26  | CA   | PRO  | 2  | 1.105  | 0.279  | -1.296 | 1.00 | 0.00 |
| ATOM     | 27  | HA   | PRO  | 2  | 1.397  | 1.092  | -0.792 | 1.00 | 0.00 |
| ATOM     | 28  | CB   | PRO  | 2  | 0.238  | -0.633 | -0.443 | 1.00 | 0.00 |

|      |    |      |     |   |        |        |        |      |      |
|------|----|------|-----|---|--------|--------|--------|------|------|
| ATOM | 29 | 2HB  | PRO | 2 | -0.154 | -0.100 | 0.423  | 1.00 | 0.00 |
| ATOM | 30 | QB   | PRO | 2 | -0.154 | -0.100 | 0.423  | 1.00 | 0.00 |
| ATOM | 31 | CG   | PRO | 2 | -0.888 | -1.103 | -1.350 | 1.00 | 0.00 |
| ATOM | 32 | 2HG  | PRO | 2 | -1.846 | -1.038 | -0.834 | 1.00 | 0.00 |
| ATOM | 33 | QG   | PRO | 2 | -1.846 | -1.038 | -0.834 | 1.00 | 0.00 |
| ATOM | 34 | 2HD  | PRO | 2 | -1.814 | 0.352  | -2.664 | 1.00 | 0.00 |
| ATOM | 35 | QD   | PRO | 2 | -1.814 | 0.352  | -2.664 | 1.00 | 0.00 |
| ATOM | 36 | C    | PRO | 2 | 2.391  | -0.399 | -1.777 | 1.00 | 0.00 |
| ATOM | 37 | O    | PRO | 2 | 2.450  | -0.900 | -2.898 | 1.00 | 0.00 |
| ATOM | 38 | N    | ILE | 3 | 3.388  | -0.390 | -0.905 | 1.00 | 0.00 |
| ATOM | 39 | H    | ILE | 3 | 3.331  | 0.020  | 0.005  | 1.00 | 0.00 |
| ATOM | 40 | CA   | ILE | 3 | 4.669  | -0.997 | -1.227 | 1.00 | 0.00 |
| ATOM | 41 | HA   | ILE | 3 | 4.674  | -1.200 | -2.297 | 1.00 | 0.00 |
| ATOM | 42 | CB   | ILE | 3 | 5.810  | -0.018 | -0.946 | 1.00 | 0.00 |
| ATOM | 43 | HB   | ILE | 3 | 6.511  | -0.499 | -0.263 | 1.00 | 0.00 |
| ATOM | 44 | QG2  | ILE | 3 | 6.763  | 0.385  | -2.532 | 1.00 | 0.00 |
| ATOM | 45 | CG2  | ILE | 3 | 6.581  | 0.307  | -2.227 | 1.00 | 0.00 |
| ATOM | 46 | 1HG2 | ILE | 3 | 7.436  | -0.362 | -2.318 | 1.00 | 0.00 |
| ATOM | 47 | 2HG2 | ILE | 3 | 5.925  | 0.177  | -3.089 | 1.00 | 0.00 |
| ATOM | 48 | 3HG2 | ILE | 3 | 6.929  | 1.339  | -2.190 | 1.00 | 0.00 |
| ATOM | 49 | CG1  | ILE | 3 | 5.294  | 1.243  | -0.251 | 1.00 | 0.00 |
| ATOM | 50 | 2HG1 | ILE | 3 | 4.337  | 1.534  | -0.683 | 1.00 | 0.00 |
| ATOM | 51 | QG1  | ILE | 3 | 4.337  | 1.534  | -0.683 | 1.00 | 0.00 |
| ATOM | 52 | QD1  | ILE | 3 | 5.095  | 0.959  | 1.610  | 1.00 | 0.00 |
| ATOM | 53 | CD1  | ILE | 3 | 5.133  | 1.014  | 1.253  | 1.00 | 0.00 |
| ATOM | 54 | 1HD1 | ILE | 3 | 4.073  | 0.992  | 1.506  | 1.00 | 0.00 |
| ATOM | 55 | 2HD1 | ILE | 3 | 5.591  | 0.063  | 1.526  | 1.00 | 0.00 |
| ATOM | 56 | 3HD1 | ILE | 3 | 5.621  | 1.821  | 1.797  | 1.00 | 0.00 |
| ATOM | 57 | C    | ILE | 3 | 4.800  | -2.326 | -0.480 | 1.00 | 0.00 |
| ATOM | 58 | O    | ILE | 3 | 5.295  | -3.342 | -0.991 | 1.00 | 0.00 |
| ATOM | 59 | N    | PIP | 4 | 4.345  | -2.317 | 0.759  | 1.00 | 0.00 |
| ATOM | 60 | CE   | PIP | 4 | 3.765  | -1.140 | 1.367  | 1.00 | 0.00 |
| ATOM | 61 | CA   | PIP | 4 | 4.404  | -3.488 | 1.622  | 1.00 | 0.00 |
| ATOM | 62 | HA   | PIP | 4 | 5.397  | -3.938 | 1.620  | 1.00 | 0.00 |
| ATOM | 63 | CB   | PIP | 4 | 4.066  | -3.133 | 3.082  | 1.00 | 0.00 |
| ATOM | 64 | 2HB  | PIP | 4 | 4.120  | -4.032 | 3.695  | 1.00 | 0.00 |
| ATOM | 65 | 3HB  | PIP | 4 | 4.779  | -2.398 | 3.452  | 1.00 | 0.00 |
| ATOM | 66 | QB   | PIP | 4 | 4.449  | -3.215 | 3.574  | 1.00 | 0.00 |
| ATOM | 67 | CG   | PIP | 4 | 2.642  | -2.550 | 3.152  | 1.00 | 0.00 |
| ATOM | 68 | 2HG  | PIP | 4 | 2.403  | -2.300 | 4.186  | 1.00 | 0.00 |
| ATOM | 69 | 3HG  | PIP | 4 | 1.928  | -3.286 | 2.783  | 1.00 | 0.00 |
| ATOM | 70 | QG   | PIP | 4 | 2.166  | -2.793 | 3.485  | 1.00 | 0.00 |
| ATOM | 71 | CD   | PIP | 4 | 2.613  | -1.556 | 2.299  | 1.00 | 0.00 |
| ATOM | 72 | 2HD  | PIP | 4 | 2.176  | -0.669 | 2.757  | 1.00 | 0.00 |
| ATOM | 73 | 3HD  | PIP | 4 | 1.850  | -2.080 | 1.722  | 1.00 | 0.00 |
| ATOM | 74 | QD   | PIP | 4 | 2.013  | -1.374 | 2.240  | 1.00 | 0.00 |
| ATOM | 75 | 1HE  | PIP | 4 | 4.527  | -0.615 | 1.943  | 1.00 | 0.00 |
| ATOM | 76 | 2HE  | PIP | 4 | 3.383  | -0.480 | 0.588  | 1.00 | 0.00 |
| ATOM | 77 | QE   | PIP | 4 | 3.955  | -0.548 | 1.266  | 1.00 | 0.00 |
| ATOM | 78 | C    | PIP | 4 | 3.411  | -4.572 | 1.175  | 1.00 | 0.00 |
| ATOM | 79 | O    | PIP | 4 | 2.762  | -4.310 | 0.163  | 1.00 | 0.00 |
| ATOM | 80 | N    | ALA | 5 | 3.306  | -5.700 | 1.862  | 1.00 | 0.00 |
| ATOM | 81 | H    | ALA | 5 | 3.839  | -5.906 | 2.683  | 1.00 | 0.00 |
| ATOM | 82 | CA   | ALA | 5 | 2.381  | -6.744 | 1.452  | 1.00 | 0.00 |
| ATOM | 83 | HA   | ALA | 5 | 2.799  | -7.230 | 0.571  | 1.00 | 0.00 |
| ATOM | 84 | QB   | ALA | 5 | 2.221  | -8.025 | 2.837  | 1.00 | 0.00 |
| ATOM | 85 | CB   | ALA | 5 | 2.252  | -7.779 | 2.571  | 1.00 | 0.00 |
| ATOM | 86 | 1HB  | ALA | 5 | 2.781  | -7.426 | 3.456  | 1.00 | 0.00 |
| ATOM | 87 | 2HB  | ALA | 5 | 1.199  | -7.925 | 2.812  | 1.00 | 0.00 |

|      |     |      |      |   |        |        |        |      |      |
|------|-----|------|------|---|--------|--------|--------|------|------|
| ATOM | 88  | 3HB  | ALA  | 5 | 2.684  | -8.725 | 2.242  | 1.00 | 0.00 |
| ATOM | 89  | C    | ALA  | 5 | 1.037  | -6.112 | 1.084  | 1.00 | 0.00 |
| ATOM | 90  | O    | ALA  | 5 | 0.700  | -5.033 | 1.569  | 1.00 | 0.00 |
| ATOM | 91  | N    | PRO  | 6 | 0.286  | -6.830 | 0.206  | 1.00 | 0.00 |
| ATOM | 92  | CD   | PRO  | 6 | 0.652  | -8.111 | -0.389 | 1.00 | 0.00 |
| ATOM | 93  | CA   | PRO  | 6 | -1.014 | -6.351 | -0.232 | 1.00 | 0.00 |
| ATOM | 94  | HA   | PRO  | 6 | -0.977 | -5.369 | -0.418 | 1.00 | 0.00 |
| ATOM | 95  | CB   | PRO  | 6 | -1.325 | -7.150 | -1.487 | 1.00 | 0.00 |
| ATOM | 96  | 2HB  | PRO  | 6 | -1.143 | -6.557 | -2.383 | 1.00 | 0.00 |
| ATOM | 97  | QB   | PRO  | 6 | -1.143 | -6.557 | -2.383 | 1.00 | 0.00 |
| ATOM | 98  | CG   | PRO  | 6 | -0.412 | -8.365 | -1.443 | 1.00 | 0.00 |
| ATOM | 99  | 2HG  | PRO  | 6 | 0.048  | -8.532 | -2.418 | 1.00 | 0.00 |
| ATOM | 100 | QG   | PRO  | 6 | 0.048  | -8.532 | -2.418 | 1.00 | 0.00 |
| ATOM | 101 | 2HD  | PRO  | 6 | 1.648  | -8.072 | -0.832 | 1.00 | 0.00 |
| ATOM | 102 | QD   | PRO  | 6 | 1.648  | -8.072 | -0.832 | 1.00 | 0.00 |
| ATOM | 103 | C    | PRO  | 6 | -2.064 | -6.530 | 0.866  | 1.00 | 0.00 |
| ATOM | 104 | O    | PRO  | 6 | -2.354 | -7.632 | 1.347  | 1.00 | 0.00 |
| ATOM | 105 | N    | THRM | 7 | -2.644 | -5.416 | 1.270  | 1.00 | 0.00 |
| ATOM | 106 | QB   | THRM | 7 | -3.915 | -5.600 | 2.594  | 1.00 | 0.00 |
| ATOM | 107 | CN   | THRM | 7 | -3.664 | -5.563 | 2.333  | 1.00 | 0.00 |
| ATOM | 108 | 1HNB | THRM | 7 | -3.757 | -6.615 | 2.604  | 1.00 | 0.00 |
| ATOM | 109 | 2HNB | THRM | 7 | -3.363 | -4.988 | 3.208  | 1.00 | 0.00 |
| ATOM | 110 | 3HNB | THRM | 7 | -4.624 | -5.195 | 1.970  | 1.00 | 0.00 |
| ATOM | 111 | CA   | THRM | 7 | -2.301 | -4.115 | 0.703  | 1.00 | 0.00 |
| ATOM | 112 | HA   | THRM | 7 | -1.204 | -4.069 | 0.574  | 1.00 | 0.00 |
| ATOM | 113 | CB   | THRM | 7 | -2.980 | -3.928 | -0.696 | 1.00 | 0.00 |
| ATOM | 114 | HB   | THRM | 7 | -3.498 | -2.945 | -0.704 | 1.00 | 0.00 |
| ATOM | 115 | QG2  | THRM | 7 | -1.795 | -4.010 | -2.255 | 1.00 | 0.00 |
| ATOM | 116 | OG1  | THRM | 7 | -3.942 | -4.950 | -0.922 | 1.00 | 0.00 |
| ATOM | 117 | 1HG  | THRM | 7 | -3.442 | -5.757 | -1.079 | 1.00 | 0.00 |
| ATOM | 118 | CG2  | THRM | 7 | -2.048 | -3.996 | -1.924 | 1.00 | 0.00 |
| ATOM | 119 | 1HG2 | THRM | 7 | -2.173 | -3.123 | -2.590 | 1.00 | 0.00 |
| ATOM | 120 | 2HG2 | THRM | 7 | -0.977 | -4.006 | -1.643 | 1.00 | 0.00 |
| ATOM | 121 | 3HG2 | THRM | 7 | -2.233 | -4.901 | -2.532 | 1.00 | 0.00 |
| ATOM | 122 | C    | THRM | 7 | -2.691 | -2.996 | 1.639  | 1.00 | 0.00 |
| ATOM | 123 | O    | THRM | 7 | -3.547 | -3.197 | 2.500  | 1.00 | 0.00 |
| ATOM | 124 | N    | VAL  | 8 | -2.063 | -1.843 | 1.460  | 1.00 | 0.00 |
| ATOM | 125 | H    | VAL  | 8 | -1.369 | -1.688 | 0.758  | 1.00 | 0.00 |
| ATOM | 126 | CA   | VAL  | 8 | -2.355 | -0.694 | 2.300  | 1.00 | 0.00 |
| ATOM | 127 | HA   | VAL  | 8 | -3.366 | -0.818 | 2.687  | 1.00 | 0.00 |
| ATOM | 128 | CB   | VAL  | 8 | -1.394 | -0.658 | 3.490  | 1.00 | 0.00 |
| ATOM | 129 | HB   | VAL  | 8 | -1.170 | 0.386  | 3.709  | 1.00 | 0.00 |
| ATOM | 130 | QG1  | VAL  | 8 | -2.191 | -1.418 | 5.030  | 1.00 | 0.00 |
| ATOM | 131 | QG2  | VAL  | 8 | 0.236  | -1.526 | 3.072  | 1.00 | 0.00 |
| ATOM | 132 | CG1  | VAL  | 8 | -2.038 | -1.273 | 4.734  | 1.00 | 0.00 |
| ATOM | 133 | 1HG1 | VAL  | 8 | -1.370 | -2.023 | 5.156  | 1.00 | 0.00 |
| ATOM | 134 | 2HG1 | VAL  | 8 | -2.219 | -0.491 | 5.473  | 1.00 | 0.00 |
| ATOM | 135 | 3HG1 | VAL  | 8 | -2.984 | -1.740 | 4.460  | 1.00 | 0.00 |
| ATOM | 136 | CG2  | VAL  | 8 | -0.076 | -1.360 | 3.152  | 1.00 | 0.00 |
| ATOM | 137 | 1HG2 | VAL  | 8 | 0.298  | -0.990 | 2.197  | 1.00 | 0.00 |
| ATOM | 138 | 2HG2 | VAL  | 8 | 0.655  | -1.155 | 3.933  | 1.00 | 0.00 |
| ATOM | 139 | 3HG2 | VAL  | 8 | -0.244 | -2.434 | 3.084  | 1.00 | 0.00 |
| ATOM | 140 | QQG  | VAL  | 8 | -0.977 | -1.472 | 4.051  | 1.00 | 0.00 |
| ATOM | 141 | C    | VAL  | 8 | -2.303 | 0.578  | 1.452  | 1.00 | 0.00 |
| ATOM | 142 | O    | VAL  | 8 | -1.896 | 0.594  | 0.284  | 1.00 | 0.00 |
| ATOM | 143 | N    | THRM | 9 | -2.729 | 1.671  | 2.059  | 1.00 | 0.00 |
| ATOM | 144 | QB   | THRM | 9 | -3.299 | 1.458  | 3.799  | 1.00 | 0.00 |
| ATOM | 145 | CN   | THRM | 9 | -3.187 | 1.500  | 3.456  | 1.00 | 0.00 |
| ATOM | 146 | 1HNB | THRM | 9 | -3.086 | 0.455  | 3.747  | 1.00 | 0.00 |

|      |     |      |      |    |        |       |        |      |      |
|------|-----|------|------|----|--------|-------|--------|------|------|
| ATOM | 147 | 2HNB | THRM | 9  | -2.580 | 2.120 | 4.116  | 1.00 | 0.00 |
| ATOM | 148 | 3HNB | THRM | 9  | -4.231 | 1.800 | 3.535  | 1.00 | 0.00 |
| ATOM | 149 | CA   | THRM | 9  | -2.746 | 2.970 | 1.392  | 1.00 | 0.00 |
| ATOM | 150 | HA   | THRM | 9  | -2.410 | 2.830 | 0.348  | 1.00 | 0.00 |
| ATOM | 151 | CB   | THRM | 9  | -4.197 | 3.561 | 1.377  | 1.00 | 0.00 |
| ATOM | 152 | HB   | THRM | 9  | -4.172 | 4.533 | 0.839  | 1.00 | 0.00 |
| ATOM | 153 | QG2  | THRM | 9  | -5.586 | 2.443 | 0.563  | 1.00 | 0.00 |
| ATOM | 154 | OG1  | THRM | 9  | -4.655 | 3.788 | 2.703  | 1.00 | 0.00 |
| ATOM | 155 | 1HG  | THRM | 9  | -3.993 | 4.346 | 3.123  | 1.00 | 0.00 |
| ATOM | 156 | CG2  | THRM | 9  | -5.290 | 2.678 | 0.736  | 1.00 | 0.00 |
| ATOM | 157 | 1HG2 | THRM | 9  | -6.307 | 3.013 | 1.008  | 1.00 | 0.00 |
| ATOM | 158 | 2HG2 | THRM | 9  | -5.253 | 2.696 | -0.368 | 1.00 | 0.00 |
| ATOM | 159 | 3HG2 | THRM | 9  | -5.198 | 1.621 | 1.049  | 1.00 | 0.00 |
| ATOM | 160 | C    | THRM | 9  | -1.785 | 3.929 | 2.050  | 1.00 | 0.00 |
| ATOM | 161 | O    | THRM | 9  | -2.169 | 4.902 | 2.668  | 1.00 | 0.00 |
| ATOM | 162 | N    | VALM | 10 | -0.503 | 3.648 | 1.916  | 1.00 | 0.00 |
| ATOM | 163 | QB   | VALM | 10 | -0.105 | 2.131 | 0.946  | 1.00 | 0.00 |
| ATOM | 164 | CN   | VALM | 10 | -0.184 | 2.430 | 1.138  | 1.00 | 0.00 |
| ATOM | 165 | 1HNB | VALM | 10 | -0.440 | 1.547 | 1.723  | 1.00 | 0.00 |
| ATOM | 166 | 2HNB | VALM | 10 | -0.756 | 2.430 | 0.210  | 1.00 | 0.00 |
| ATOM | 167 | 3HNB | VALM | 10 | 0.882  | 2.415 | 0.906  | 1.00 | 0.00 |
| ATOM | 168 | CA   | VALM | 10 | 0.539  | 4.488 | 2.499  | 1.00 | 0.00 |
| ATOM | 169 | HA   | VALM | 10 | 0.188  | 5.536 | 2.509  | 1.00 | 0.00 |
| ATOM | 170 | CB   | VALM | 10 | 0.835  | 4.023 | 3.981  | 1.00 | 0.00 |
| ATOM | 171 | HB   | VALM | 10 | 1.737  | 3.376 | 3.946  | 1.00 | 0.00 |
| ATOM | 172 | QG1  | VALM | 10 | 1.212  | 5.451 | 5.294  | 1.00 | 0.00 |
| ATOM | 173 | QG2  | VALM | 10 | -0.608 | 2.968 | 4.790  | 1.00 | 0.00 |
| ATOM | 174 | CG1  | VALM | 10 | 1.138  | 5.148 | 5.008  | 1.00 | 0.00 |
| ATOM | 175 | 1HG1 | VALM | 10 | 2.027  | 5.747 | 4.732  | 1.00 | 0.00 |
| ATOM | 176 | 2HG1 | VALM | 10 | 0.292  | 5.852 | 5.122  | 1.00 | 0.00 |
| ATOM | 177 | 3HG1 | VALM | 10 | 1.317  | 4.753 | 6.027  | 1.00 | 0.00 |
| ATOM | 178 | CG2  | VALM | 10 | -0.302 | 3.186 | 4.614  | 1.00 | 0.00 |
| ATOM | 179 | 1HG2 | VALM | 10 | -0.444 | 2.216 | 4.104  | 1.00 | 0.00 |
| ATOM | 180 | 2HG2 | VALM | 10 | -0.107 | 2.968 | 5.681  | 1.00 | 0.00 |
| ATOM | 181 | 3HG2 | VALM | 10 | -1.271 | 3.720 | 4.584  | 1.00 | 0.00 |
| ATOM | 182 | QQG  | VALM | 10 | 0.302  | 4.209 | 5.042  | 1.00 | 0.00 |
| ATOM | 183 | C    | VALM | 10 | 1.796  | 4.450 | 1.663  | 1.00 | 0.00 |
| ATOM | 184 | O    | VALM | 10 | 2.842  | 3.934 | 2.076  | 1.00 | 0.00 |
| ATOM | 185 | N    | ILEM | 11 | 1.711  | 5.000 | 0.467  | 1.00 | 0.00 |
| ATOM | 186 | QB   | ILEM | 11 | 0.073  | 5.720 | 0.022  | 1.00 | 0.00 |
| ATOM | 187 | CN   | ILEM | 11 | 0.397  | 5.577 | 0.109  | 1.00 | 0.00 |
| ATOM | 188 | 1HNB | ILEM | 11 | -0.299 | 5.439 | 0.938  | 1.00 | 0.00 |
| ATOM | 189 | 2HNB | ILEM | 11 | 0.510  | 6.643 | -0.095 | 1.00 | 0.00 |
| ATOM | 190 | 3HNB | ILEM | 11 | 0.009  | 5.078 | -0.777 | 1.00 | 0.00 |
| ATOM | 191 | CA   | ILEM | 11 | 2.848  | 5.036 | -0.450 | 1.00 | 0.00 |
| ATOM | 192 | HA   | ILEM | 11 | 2.556  | 5.657 | -1.318 | 1.00 | 0.00 |
| ATOM | 193 | CB   | ILEM | 11 | 4.116  | 5.695 | 0.230  | 1.00 | 0.00 |
| ATOM | 194 | HB   | ILEM | 11 | 4.086  | 5.407 | 1.303  | 1.00 | 0.00 |
| ATOM | 195 | QG2  | ILEM | 11 | 5.821  | 5.021 | -0.529 | 1.00 | 0.00 |
| ATOM | 196 | CG2  | ILEM | 11 | 5.460  | 5.168 | -0.361 | 1.00 | 0.00 |
| ATOM | 197 | 1HG2 | ILEM | 11 | 5.324  | 4.259 | -0.973 | 1.00 | 0.00 |
| ATOM | 198 | 2HG2 | ILEM | 11 | 5.947  | 5.887 | -1.043 | 1.00 | 0.00 |
| ATOM | 199 | 3HG2 | ILEM | 11 | 6.192  | 4.917 | 0.430  | 1.00 | 0.00 |
| ATOM | 200 | CG1  | ILEM | 11 | 4.144  | 7.256 | 0.184  | 1.00 | 0.00 |
| ATOM | 201 | 2HG1 | ILEM | 11 | 5.174  | 7.613 | 0.374  | 1.00 | 0.00 |
| ATOM | 202 | QG1  | ILEM | 11 | 5.174  | 7.613 | 0.374  | 1.00 | 0.00 |
| ATOM | 203 | QD1  | ILEM | 11 | 3.604  | 8.063 | -1.512 | 1.00 | 0.00 |
| ATOM | 204 | CD1  | ILEM | 11 | 3.715  | 7.897 | -1.152 | 1.00 | 0.00 |
| ATOM | 205 | 1HD1 | ILEM | 11 | 4.254  | 7.444 | -2.004 | 1.00 | 0.00 |

Supplementary Material for Organic & Biomolecular Chemistry  
 This journal is © The Royal Society of Chemistry 2006

|          |     |      |      |    |        |       |        |      |      |
|----------|-----|------|------|----|--------|-------|--------|------|------|
| ATOM     | 206 | 2HD1 | ILEM | 11 | 2.634  | 7.763 | -1.343 | 1.00 | 0.00 |
| ATOM     | 207 | 3HD1 | ILEM | 11 | 3.925  | 8.982 | -1.187 | 1.00 | 0.00 |
| ATOM     | 208 | C    | ILEM | 11 | 3.150  | 3.660 | -0.991 | 1.00 | 0.00 |
| ATOM     | 209 | O    | ILEM | 11 | 2.873  | 2.630 | -0.359 | 1.00 | 0.00 |
| ATOM     | 210 | N    | PIPO | 12 | 3.729  | 3.619 | -2.176 | 1.00 | 0.00 |
| ATOM     | 211 | CE   | PIPO | 12 | 4.082  | 2.376 | -2.828 | 1.00 | 0.00 |
| ATOM     | 212 | CA   | PIPO | 12 | 4.074  | 4.820 | -2.920 | 1.00 | 0.00 |
| ATOM     | 213 | HA   | PIPO | 12 | 4.610  | 5.538 | -2.298 | 1.00 | 0.00 |
| ATOM     | 214 | CB   | PIPO | 12 | 4.976  | 4.502 | -4.128 | 1.00 | 0.00 |
| ATOM     | 215 | 2HB  | PIPO | 12 | 5.212  | 5.424 | -4.659 | 1.00 | 0.00 |
| ATOM     | 216 | 3HB  | PIPO | 12 | 5.897  | 4.036 | -3.781 | 1.00 | 0.00 |
| ATOM     | 217 | QB   | PIPO | 12 | 5.554  | 4.730 | -4.220 | 1.00 | 0.00 |
| ATOM     | 218 | CG   | PIPO | 12 | 4.240  | 3.539 | -5.078 | 1.00 | 0.00 |
| ATOM     | 219 | 2HG  | PIPO | 12 | 4.877  | 3.313 | -5.933 | 1.00 | 0.00 |
| ATOM     | 220 | 3HG  | PIPO | 12 | 3.318  | 4.004 | -5.426 | 1.00 | 0.00 |
| ATOM     | 221 | QG   | PIPO | 12 | 4.097  | 3.659 | -5.679 | 1.00 | 0.00 |
| ATOM     | 222 | CD   | PIPO | 12 | 3.874  | 2.514 | -4.347 | 1.00 | 0.00 |
| ATOM     | 223 | 2HD  | PIPO | 12 | 4.140  | 1.578 | -4.837 | 1.00 | 0.00 |
| ATOM     | 224 | 3HD  | PIPO | 12 | 2.829  | 2.746 | -4.551 | 1.00 | 0.00 |
| ATOM     | 225 | QD   | PIPO | 12 | 3.484  | 2.162 | -4.694 | 1.00 | 0.00 |
| ATOM     | 226 | 1HE  | PIPO | 12 | 5.127  | 2.143 | -2.624 | 1.00 | 0.00 |
| ATOM     | 227 | 2HE  | PIPO | 12 | 3.450  | 1.574 | -2.446 | 1.00 | 0.00 |
| ATOM     | 228 | QE   | PIPO | 12 | 4.289  | 1.858 | -2.535 | 1.00 | 0.00 |
| ATOM     | 229 | C    | PIPO | 12 | 2.823  | 5.533 | -3.461 | 1.00 | 0.00 |
| ATOM     | 230 | O    | PIPO | 12 | 2.631  | 6.707 | -3.122 | 1.00 | 0.00 |
| ATOM     | 231 | O1'  | PHEO | 13 | 1.996  | 4.894 | -4.267 | 1.00 | 0.00 |
| ATOM     | 232 | CA   | PHEO | 13 | 0.593  | 5.277 | -4.399 | 1.00 | 0.00 |
| ATOM     | 233 | HA   | PHEO | 13 | 0.503  | 6.172 | -5.043 | 1.00 | 0.00 |
| ATOM     | 234 | CB   | PHEO | 13 | 0.018  | 5.581 | -2.982 | 1.00 | 0.00 |
| ATOM     | 235 | 2HB  | PHEO | 13 | 0.853  | 5.758 | -2.277 | 1.00 | 0.00 |
| ATOM     | 236 | QB   | PHEO | 13 | 0.853  | 5.758 | -2.277 | 1.00 | 0.00 |
| ATOM     | 237 | QD   | PHEO | 13 | -1.086 | 6.878 | -2.889 | 1.00 | 0.00 |
| ATOM     | 238 | QE   | PHEO | 13 | -2.734 | 8.705 | -2.801 | 1.00 | 0.00 |
| ATOM     | 239 | QR   | PHEO | 13 | -2.241 | 8.158 | -2.827 | 1.00 | 0.00 |
| ATOM     | 240 | CG   | PHEO | 13 | -0.961 | 6.760 | -2.881 | 1.00 | 0.00 |
| ATOM     | 241 | CD1  | PHEO | 13 | -2.099 | 6.647 | -2.072 | 1.00 | 0.00 |
| ATOM     | 242 | 1HD  | PHEO | 13 | -2.277 | 5.741 | -1.508 | 1.00 | 0.00 |
| ATOM     | 243 | CE1  | PHEO | 13 | -3.035 | 7.674 | -2.031 | 1.00 | 0.00 |
| ATOM     | 244 | 1HE  | PHEO | 13 | -3.925 | 7.565 | -1.428 | 1.00 | 0.00 |
| ATOM     | 245 | CZ   | PHEO | 13 | -2.834 | 8.828 | -2.786 | 1.00 | 0.00 |
| ATOM     | 246 | HZ   | PHEO | 13 | -3.565 | 9.622 | -2.757 | 1.00 | 0.00 |
| ATOM     | 247 | CE2  | PHEO | 13 | -1.697 | 8.953 | -3.584 | 1.00 | 0.00 |
| ATOM     | 248 | 2HE  | PHEO | 13 | -1.544 | 9.845 | -4.173 | 1.00 | 0.00 |
| ATOM     | 249 | CD2  | PHEO | 13 | -0.764 | 7.921 | -3.633 | 1.00 | 0.00 |
| ATOM     | 250 | 2HD  | PHEO | 13 | 0.104  | 8.015 | -4.270 | 1.00 | 0.00 |
| ATOM     | 251 | C    | PHEO | 13 | -0.219 | 4.157 | -5.003 | 1.00 | 0.00 |
| ATOM     | 252 | O    | PHEO | 13 | -0.309 | 3.994 | -6.253 | 1.00 | 0.00 |
| TER      |     |      |      |    |        |       |        |      |      |
| ENDMDL   |     |      |      |    |        |       |        |      |      |
| MODEL 19 |     |      |      |    |        |       |        |      |      |
| ATOM     | 1   | N    | VALM | 1  | 0.132  | 3.181 | -5.103 | 1.00 | 0.00 |
| ATOM     | 2   | QB   | VALM | 1  | 1.243  | 3.007 | -6.564 | 1.00 | 0.00 |
| ATOM     | 3   | CN   | VALM | 1  | 1.025  | 3.041 | -6.275 | 1.00 | 0.00 |
| ATOM     | 4   | 1HNB | VALM | 1  | 0.828  | 3.849 | -6.981 | 1.00 | 0.00 |
| ATOM     | 5   | 2HNB | VALM | 1  | 2.063  | 3.089 | -5.950 | 1.00 | 0.00 |
| ATOM     | 6   | 3HNB | VALM | 1  | 0.840  | 2.082 | -6.761 | 1.00 | 0.00 |
| ATOM     | 7   | CA   | VALM | 1  | -0.319 | 2.026 | -4.333 | 1.00 | 0.00 |
| ATOM     | 8   | HA   | VALM | 1  | -1.307 | 2.256 | -3.892 | 1.00 | 0.00 |
| ATOM     | 9   | CB   | VALM | 1  | -0.452 | 0.768 | -5.280 | 1.00 | 0.00 |

|      |    |      |      |   |        |        |        |      |      |
|------|----|------|------|---|--------|--------|--------|------|------|
| ATOM | 10 | HB   | VALM | 1 | -1.289 | 0.151  | -4.891 | 1.00 | 0.00 |
| ATOM | 11 | QG1  | VALM | 1 | -0.859 | 1.129  | -7.179 | 1.00 | 0.00 |
| ATOM | 12 | QG2  | VALM | 1 | 1.139  | -0.380 | -5.315 | 1.00 | 0.00 |
| ATOM | 13 | CG1  | VALM | 1 | -0.775 | 1.059  | -6.772 | 1.00 | 0.00 |
| ATOM | 14 | 1HG1 | VALM | 1 | -1.280 | 2.034  | -6.912 | 1.00 | 0.00 |
| ATOM | 15 | 2HG1 | VALM | 1 | 0.132  | 1.066  | -7.405 | 1.00 | 0.00 |
| ATOM | 16 | 3HG1 | VALM | 1 | -1.428 | 0.287  | -7.220 | 1.00 | 0.00 |
| ATOM | 17 | CG2  | VALM | 1 | 0.807  | -0.133 | -5.304 | 1.00 | 0.00 |
| ATOM | 18 | 1HG2 | VALM | 1 | 1.679  | 0.349  | -4.825 | 1.00 | 0.00 |
| ATOM | 19 | 2HG2 | VALM | 1 | 0.636  | -1.092 | -4.781 | 1.00 | 0.00 |
| ATOM | 20 | 3HG2 | VALM | 1 | 1.103  | -0.398 | -6.338 | 1.00 | 0.00 |
| ATOM | 21 | QQG  | VALM | 1 | 0.140  | 0.374  | -6.247 | 1.00 | 0.00 |
| ATOM | 22 | C    | VALM | 1 | 0.621  | 1.739  | -3.186 | 1.00 | 0.00 |
| ATOM | 23 | O    | VALM | 1 | 1.611  | 2.450  | -3.023 | 1.00 | 0.00 |
| ATOM | 24 | N    | PRO  | 2 | 0.291  | 0.683  | -2.396 | 1.00 | 0.00 |
| ATOM | 25 | CD   | PRO  | 2 | -0.874 | -0.181 | -2.558 | 1.00 | 0.00 |
| ATOM | 26 | CA   | PRO  | 2 | 1.120  | 0.310  | -1.262 | 1.00 | 0.00 |
| ATOM | 27 | HA   | PRO  | 2 | 1.419  | 1.127  | -0.767 | 1.00 | 0.00 |
| ATOM | 28 | CB   | PRO  | 2 | 0.234  | -0.576 | -0.402 | 1.00 | 0.00 |
| ATOM | 29 | 2HB  | PRO  | 2 | -0.157 | -0.025 | 0.454  | 1.00 | 0.00 |
| ATOM | 30 | QB   | PRO  | 2 | -0.157 | -0.025 | 0.454  | 1.00 | 0.00 |
| ATOM | 31 | CG   | PRO  | 2 | -0.892 | -1.044 | -1.308 | 1.00 | 0.00 |
| ATOM | 32 | 2HG  | PRO  | 2 | -1.853 | -0.959 | -0.800 | 1.00 | 0.00 |
| ATOM | 33 | QG   | PRO  | 2 | -1.853 | -0.959 | -0.800 | 1.00 | 0.00 |
| ATOM | 34 | 2HD  | PRO  | 2 | -1.790 | 0.403  | -2.650 | 1.00 | 0.00 |
| ATOM | 35 | QD   | PRO  | 2 | -1.790 | 0.403  | -2.650 | 1.00 | 0.00 |
| ATOM | 36 | C    | PRO  | 2 | 2.398  | -0.391 | -1.724 | 1.00 | 0.00 |
| ATOM | 37 | O    | PRO  | 2 | 2.455  | -0.921 | -2.832 | 1.00 | 0.00 |
| ATOM | 38 | N    | ILE  | 3 | 3.395  | -0.372 | -0.850 | 1.00 | 0.00 |
| ATOM | 39 | H    | ILE  | 3 | 3.341  | 0.061  | 0.050  | 1.00 | 0.00 |
| ATOM | 40 | CA   | ILE  | 3 | 4.669  | -0.999 | -1.155 | 1.00 | 0.00 |
| ATOM | 41 | HA   | ILE  | 3 | 4.690  | -1.194 | -2.227 | 1.00 | 0.00 |
| ATOM | 42 | CB   | ILE  | 3 | 5.824  | -0.044 | -0.846 | 1.00 | 0.00 |
| ATOM | 43 | HB   | ILE  | 3 | 6.514  | -0.550 | -0.170 | 1.00 | 0.00 |
| ATOM | 44 | QG2  | ILE  | 3 | 6.791  | 0.382  | -2.417 | 1.00 | 0.00 |
| ATOM | 45 | CG2  | ILE  | 3 | 6.605  | 0.300  | -2.115 | 1.00 | 0.00 |
| ATOM | 46 | 1HG2 | ILE  | 3 | 6.976  | 1.323  | -2.047 | 1.00 | 0.00 |
| ATOM | 47 | 2HG2 | ILE  | 3 | 7.447  | -0.385 | -2.221 | 1.00 | 0.00 |
| ATOM | 48 | 3HG2 | ILE  | 3 | 5.950  | 0.208  | -2.982 | 1.00 | 0.00 |
| ATOM | 49 | CG1  | ILE  | 3 | 5.322  | 1.208  | -0.125 | 1.00 | 0.00 |
| ATOM | 50 | 2HG1 | ILE  | 3 | 4.385  | 1.540  | -0.573 | 1.00 | 0.00 |
| ATOM | 51 | QG1  | ILE  | 3 | 4.385  | 1.540  | -0.573 | 1.00 | 0.00 |
| ATOM | 52 | QD1  | ILE  | 3 | 5.061  | 0.871  | 1.720  | 1.00 | 0.00 |
| ATOM | 53 | CD1  | ILE  | 3 | 5.111  | 0.936  | 1.366  | 1.00 | 0.00 |
| ATOM | 54 | 1HD1 | ILE  | 3 | 5.518  | -0.044 | 1.617  | 1.00 | 0.00 |
| ATOM | 55 | 2HD1 | ILE  | 3 | 5.620  | 1.701  | 1.952  | 1.00 | 0.00 |
| ATOM | 56 | 3HD1 | ILE  | 3 | 4.044  | 0.955  | 1.592  | 1.00 | 0.00 |
| ATOM | 57 | C    | ILE  | 3 | 4.764  | -2.336 | -0.418 | 1.00 | 0.00 |
| ATOM | 58 | O    | ILE  | 3 | 5.279  | -3.348 | -0.918 | 1.00 | 0.00 |
| ATOM | 59 | N    | PIP  | 4 | 4.254  | -2.340 | 0.800  | 1.00 | 0.00 |
| ATOM | 60 | CE   | PIP  | 4 | 3.650  | -1.167 | 1.394  | 1.00 | 0.00 |
| ATOM | 61 | CA   | PIP  | 4 | 4.272  | -3.519 | 1.651  | 1.00 | 0.00 |
| ATOM | 62 | HA   | PIP  | 4 | 5.262  | -3.973 | 1.690  | 1.00 | 0.00 |
| ATOM | 63 | CB   | PIP  | 4 | 3.869  | -3.181 | 3.099  | 1.00 | 0.00 |
| ATOM | 64 | 2HB  | PIP  | 4 | 3.893  | -4.086 | 3.705  | 1.00 | 0.00 |
| ATOM | 65 | 3HB  | PIP  | 4 | 4.565  | -2.451 | 3.509  | 1.00 | 0.00 |
| ATOM | 66 | QB   | PIP  | 4 | 4.229  | -3.269 | 3.607  | 1.00 | 0.00 |
| ATOM | 67 | CG   | PIP  | 4 | 2.444  | -2.594 | 3.112  | 1.00 | 0.00 |
| ATOM | 68 | 2HG  | PIP  | 4 | 2.159  | -2.354 | 4.136  | 1.00 | 0.00 |

|      |     |      |      |   |        |        |        |      |      |
|------|-----|------|------|---|--------|--------|--------|------|------|
| ATOM | 69  | 3HG  | PIP  | 4 | 1.746  | -3.323 | 2.702  | 1.00 | 0.00 |
| ATOM | 70  | QG   | PIP  | 4 | 1.953  | -2.839 | 3.419  | 1.00 | 0.00 |
| ATOM | 71  | CD   | PIP  | 4 | 2.456  | -1.591 | 2.268  | 1.00 | 0.00 |
| ATOM | 72  | 2HD  | PIP  | 4 | 2.001  | -0.707 | 2.716  | 1.00 | 0.00 |
| ATOM | 73  | 3HD  | PIP  | 4 | 1.718  | -2.105 | 1.653  | 1.00 | 0.00 |
| ATOM | 74  | OD   | PIP  | 4 | 1.859  | -1.406 | 2.184  | 1.00 | 0.00 |
| ATOM | 75  | 1HE  | PIP  | 4 | 4.386  | -0.652 | 2.010  | 1.00 | 0.00 |
| ATOM | 76  | 2HE  | PIP  | 4 | 3.304  | -0.498 | 0.606  | 1.00 | 0.00 |
| ATOM | 77  | QE   | PIP  | 4 | 3.845  | -0.575 | 1.308  | 1.00 | 0.00 |
| ATOM | 78  | C    | PIP  | 4 | 3.296  | -4.597 | 1.148  | 1.00 | 0.00 |
| ATOM | 79  | O    | PIP  | 4 | 2.686  | -4.317 | 0.117  | 1.00 | 0.00 |
| ATOM | 80  | N    | ALA  | 5 | 3.166  | -5.736 | 1.812  | 1.00 | 0.00 |
| ATOM | 81  | H    | ALA  | 5 | 3.666  | -5.956 | 2.649  | 1.00 | 0.00 |
| ATOM | 82  | CA   | ALA  | 5 | 2.258  | -6.772 | 1.349  | 1.00 | 0.00 |
| ATOM | 83  | HA   | ALA  | 5 | 2.706  | -7.238 | 0.471  | 1.00 | 0.00 |
| ATOM | 84  | QB   | ALA  | 5 | 2.055  | -8.083 | 2.700  | 1.00 | 0.00 |
| ATOM | 85  | CB   | ALA  | 5 | 2.094  | -7.832 | 2.440  | 1.00 | 0.00 |
| ATOM | 86  | 1HB  | ALA  | 5 | 2.816  | -7.649 | 3.236  | 1.00 | 0.00 |
| ATOM | 87  | 2HB  | ALA  | 5 | 1.084  | -7.780 | 2.848  | 1.00 | 0.00 |
| ATOM | 88  | 3HB  | ALA  | 5 | 2.264  | -8.821 | 2.015  | 1.00 | 0.00 |
| ATOM | 89  | C    | ALA  | 5 | 0.925  | -6.135 | 0.950  | 1.00 | 0.00 |
| ATOM | 90  | O    | ALA  | 5 | 0.589  | -5.048 | 1.415  | 1.00 | 0.00 |
| ATOM | 91  | N    | PRO  | 6 | 0.184  | -6.859 | 0.068  | 1.00 | 0.00 |
| ATOM | 92  | CD   | PRO  | 6 | 0.551  | -8.151 | -0.504 | 1.00 | 0.00 |
| ATOM | 93  | CA   | PRO  | 6 | -1.105 | -6.376 | -0.399 | 1.00 | 0.00 |
| ATOM | 94  | HA   | PRO  | 6 | -1.057 | -5.397 | -0.597 | 1.00 | 0.00 |
| ATOM | 95  | CB   | PRO  | 6 | -1.400 | -7.190 | -1.649 | 1.00 | 0.00 |
| ATOM | 96  | 2HB  | PRO  | 6 | -1.198 | -6.609 | -2.549 | 1.00 | 0.00 |
| ATOM | 97  | QB   | PRO  | 6 | -1.198 | -6.609 | -2.549 | 1.00 | 0.00 |
| ATOM | 98  | CG   | PRO  | 6 | -0.498 | -8.411 | -1.573 | 1.00 | 0.00 |
| ATOM | 99  | 2HG  | PRO  | 6 | -0.023 | -8.594 | -2.538 | 1.00 | 0.00 |
| ATOM | 100 | QG   | PRO  | 6 | -0.023 | -8.594 | -2.538 | 1.00 | 0.00 |
| ATOM | 101 | 2HD  | PRO  | 6 | 1.554  | -8.125 | -0.931 | 1.00 | 0.00 |
| ATOM | 102 | QD   | PRO  | 6 | 1.554  | -8.125 | -0.931 | 1.00 | 0.00 |
| ATOM | 103 | C    | PRO  | 6 | -2.174 | -6.533 | 0.683  | 1.00 | 0.00 |
| ATOM | 104 | O    | PRO  | 6 | -2.592 | -7.634 | 1.064  | 1.00 | 0.00 |
| ATOM | 105 | N    | THRM | 7 | -2.627 | -5.400 | 1.189  | 1.00 | 0.00 |
| ATOM | 106 | QB   | THRM | 7 | -3.917 | -5.557 | 2.496  | 1.00 | 0.00 |
| ATOM | 107 | CN   | THRM | 7 | -3.662 | -5.527 | 2.238  | 1.00 | 0.00 |
| ATOM | 108 | 1HNB | THRM | 7 | -3.877 | -6.581 | 2.414  | 1.00 | 0.00 |
| ATOM | 109 | 2HNB | THRM | 7 | -3.303 | -5.071 | 3.161  | 1.00 | 0.00 |
| ATOM | 110 | 3HNB | THRM | 7 | -4.572 | -5.020 | 1.914  | 1.00 | 0.00 |
| ATOM | 111 | CA   | THRM | 7 | -2.134 | -4.102 | 0.740  | 1.00 | 0.00 |
| ATOM | 112 | HA   | THRM | 7 | -1.035 | -4.162 | 0.638  | 1.00 | 0.00 |
| ATOM | 113 | CB   | THRM | 7 | -2.748 | -3.732 | -0.652 | 1.00 | 0.00 |
| ATOM | 114 | HB   | THRM | 7 | -1.922 | -3.664 | -1.392 | 1.00 | 0.00 |
| ATOM | 115 | QG2  | THRM | 7 | -4.106 | -4.960 | -1.353 | 1.00 | 0.00 |
| ATOM | 116 | OG1  | THRM | 7 | -3.405 | -2.472 | -0.588 | 1.00 | 0.00 |
| ATOM | 117 | 1HG  | THRM | 7 | -4.133 | -2.581 | 0.030  | 1.00 | 0.00 |
| ATOM | 118 | CG2  | THRM | 7 | -3.818 | -4.697 | -1.206 | 1.00 | 0.00 |
| ATOM | 119 | 1HG2 | THRM | 7 | -3.468 | -5.745 | -1.217 | 1.00 | 0.00 |
| ATOM | 120 | 2HG2 | THRM | 7 | -4.743 | -4.696 | -0.599 | 1.00 | 0.00 |
| ATOM | 121 | 3HG2 | THRM | 7 | -4.108 | -4.437 | -2.242 | 1.00 | 0.00 |
| ATOM | 122 | C    | THRM | 7 | -2.434 | -3.027 | 1.758  | 1.00 | 0.00 |
| ATOM | 123 | O    | THRM | 7 | -3.175 | -3.282 | 2.707  | 1.00 | 0.00 |
| ATOM | 124 | N    | VAL  | 8 | -1.861 | -1.852 | 1.549  | 1.00 | 0.00 |
| ATOM | 125 | H    | VAL  | 8 | -1.259 | -1.653 | 0.774  | 1.00 | 0.00 |
| ATOM | 126 | CA   | VAL  | 8 | -2.075 | -0.742 | 2.461  | 1.00 | 0.00 |
| ATOM | 127 | HA   | VAL  | 8 | -3.038 | -0.896 | 2.947  | 1.00 | 0.00 |

|      |     |      |      |    |        |        |        |      |      |
|------|-----|------|------|----|--------|--------|--------|------|------|
| ATOM | 128 | CB   | VAL  | 8  | -0.993 | -0.736 | 3.542  | 1.00 | 0.00 |
| ATOM | 129 | HB   | VAL  | 8  | -0.322 | -1.573 | 3.349  | 1.00 | 0.00 |
| ATOM | 130 | QG1  | VAL  | 8  | 0.029  | 0.857  | 3.471  | 1.00 | 0.00 |
| ATOM | 131 | QG2  | VAL  | 8  | -1.749 | -0.981 | 5.260  | 1.00 | 0.00 |
| ATOM | 132 | CG1  | VAL  | 8  | -0.167 | 0.551  | 3.484  | 1.00 | 0.00 |
| ATOM | 133 | 1HG1 | VAL  | 8  | -0.836 | 1.411  | 3.447  | 1.00 | 0.00 |
| ATOM | 134 | 2HG1 | VAL  | 8  | 0.462  | 0.619  | 4.373  | 1.00 | 0.00 |
| ATOM | 135 | 3HG1 | VAL  | 8  | 0.461  | 0.540  | 2.594  | 1.00 | 0.00 |
| ATOM | 136 | CG2  | VAL  | 8  | -1.604 | -0.934 | 4.930  | 1.00 | 0.00 |
| ATOM | 137 | 1HG2 | VAL  | 8  | -2.591 | -1.387 | 4.832  | 1.00 | 0.00 |
| ATOM | 138 | 2HG2 | VAL  | 8  | -0.961 | -1.587 | 5.521  | 1.00 | 0.00 |
| ATOM | 139 | 3HG2 | VAL  | 8  | -1.696 | 0.031  | 5.429  | 1.00 | 0.00 |
| ATOM | 140 | QQG  | VAL  | 8  | -0.860 | -0.062 | 4.366  | 1.00 | 0.00 |
| ATOM | 141 | C    | VAL  | 8  | -2.131 | 0.563  | 1.664  | 1.00 | 0.00 |
| ATOM | 142 | O    | VAL  | 8  | -1.732 | 0.658  | 0.497  | 1.00 | 0.00 |
| ATOM | 143 | N    | THRM | 9  | -2.639 | 1.593  | 2.315  | 1.00 | 0.00 |
| ATOM | 144 | QB   | THRM | 9  | -3.181 | 1.267  | 4.047  | 1.00 | 0.00 |
| ATOM | 145 | CN   | THRM | 9  | -3.074 | 1.332  | 3.705  | 1.00 | 0.00 |
| ATOM | 146 | 1HNB | THRM | 9  | -2.888 | 0.287  | 3.953  | 1.00 | 0.00 |
| ATOM | 147 | 2HNB | THRM | 9  | -2.516 | 1.972  | 4.388  | 1.00 | 0.00 |
| ATOM | 148 | 3HNB | THRM | 9  | -4.139 | 1.542  | 3.799  | 1.00 | 0.00 |
| ATOM | 149 | CA   | THRM | 9  | -2.765 | 2.912  | 1.700  | 1.00 | 0.00 |
| ATOM | 150 | HA   | THRM | 9  | -2.478 | 2.829  | 0.636  | 1.00 | 0.00 |
| ATOM | 151 | CB   | THRM | 9  | -4.244 | 3.419  | 1.784  | 1.00 | 0.00 |
| ATOM | 152 | HB   | THRM | 9  | -4.357 | 4.015  | 2.715  | 1.00 | 0.00 |
| ATOM | 153 | QG2  | THRM | 9  | -4.880 | 4.504  | 0.281  | 1.00 | 0.00 |
| ATOM | 154 | OG1  | THRM | 9  | -5.144 | 2.320  | 1.838  | 1.00 | 0.00 |
| ATOM | 155 | 1HG  | THRM | 9  | -4.987 | 1.808  | 1.039  | 1.00 | 0.00 |
| ATOM | 156 | CG2  | THRM | 9  | -4.743 | 4.272  | 0.599  | 1.00 | 0.00 |
| ATOM | 157 | 1HG2 | THRM | 9  | -5.847 | 4.303  | 0.543  | 1.00 | 0.00 |
| ATOM | 158 | 2HG2 | THRM | 9  | -4.417 | 5.326  | 0.669  | 1.00 | 0.00 |
| ATOM | 159 | 3HG2 | THRM | 9  | -4.377 | 3.882  | -0.370 | 1.00 | 0.00 |
| ATOM | 160 | C    | THRM | 9  | -1.823 | 3.901  | 2.345  | 1.00 | 0.00 |
| ATOM | 161 | O    | THRM | 9  | -2.209 | 4.726  | 3.150  | 1.00 | 0.00 |
| ATOM | 162 | N    | VALM | 10 | -0.557 | 3.816  | 1.983  | 1.00 | 0.00 |
| ATOM | 163 | QB   | VALM | 10 | -0.155 | 2.506  | 0.751  | 1.00 | 0.00 |
| ATOM | 164 | CN   | VALM | 10 | -0.234 | 2.764  | 0.994  | 1.00 | 0.00 |
| ATOM | 165 | 1HNB | VALM | 10 | 0.794  | 2.887  | 0.655  | 1.00 | 0.00 |
| ATOM | 166 | 2HNB | VALM | 10 | -0.351 | 1.783  | 1.455  | 1.00 | 0.00 |
| ATOM | 167 | 3HNB | VALM | 10 | -0.909 | 2.847  | 0.141  | 1.00 | 0.00 |
| ATOM | 168 | CA   | VALM | 10 | 0.464  | 4.709  | 2.524  | 1.00 | 0.00 |
| ATOM | 169 | HA   | VALM | 10 | 0.074  | 5.743  | 2.515  | 1.00 | 0.00 |
| ATOM | 170 | CB   | VALM | 10 | 0.806  | 4.292  | 4.010  | 1.00 | 0.00 |
| ATOM | 171 | HB   | VALM | 10 | 1.317  | 3.307  | 3.965  | 1.00 | 0.00 |
| ATOM | 172 | QG1  | VALM | 10 | 2.008  | 5.497  | 5.014  | 1.00 | 0.00 |
| ATOM | 173 | QG2  | VALM | 10 | -0.768 | 4.065  | 5.159  | 1.00 | 0.00 |
| ATOM | 174 | CG1  | VALM | 10 | 1.752  | 5.245  | 4.792  | 1.00 | 0.00 |
| ATOM | 175 | 1HG1 | VALM | 10 | 2.099  | 6.096  | 4.177  | 1.00 | 0.00 |
| ATOM | 176 | 2HG1 | VALM | 10 | 1.270  | 5.669  | 5.694  | 1.00 | 0.00 |
| ATOM | 177 | 3HG1 | VALM | 10 | 2.654  | 4.727  | 5.170  | 1.00 | 0.00 |
| ATOM | 178 | CG2  | VALM | 10 | -0.437 | 4.119  | 4.915  | 1.00 | 0.00 |
| ATOM | 179 | 1HG2 | VALM | 10 | -1.041 | 5.043  | 4.980  | 1.00 | 0.00 |
| ATOM | 180 | 2HG2 | VALM | 10 | -1.104 | 3.318  | 4.548  | 1.00 | 0.00 |
| ATOM | 181 | 3HG2 | VALM | 10 | -0.158 | 3.835  | 5.947  | 1.00 | 0.00 |
| ATOM | 182 | QQG  | VALM | 10 | 0.620  | 4.781  | 5.086  | 1.00 | 0.00 |
| ATOM | 183 | C    | VALM | 10 | 1.705  | 4.696  | 1.664  | 1.00 | 0.00 |
| ATOM | 184 | O    | VALM | 10 | 2.801  | 4.323  | 2.099  | 1.00 | 0.00 |
| ATOM | 185 | N    | ILEM | 11 | 1.550  | 5.108  | 0.419  | 1.00 | 0.00 |
| ATOM | 186 | QB   | ILEM | 11 | -0.156 | 5.626  | -0.054 | 1.00 | 0.00 |



|      |     |      |      |    |        |       |        |      |      |
|------|-----|------|------|----|--------|-------|--------|------|------|
| ATOM | 187 | CN   | ILEM | 11 | 0.181  | 5.524 | 0.039  | 1.00 | 0.00 |
| ATOM | 188 | 1HNB | ILEM | 11 | -0.485 | 5.411 | 0.895  | 1.00 | 0.00 |
| ATOM | 189 | 2HNB | ILEM | 11 | 0.192  | 6.568 | -0.275 | 1.00 | 0.00 |
| ATOM | 190 | 3HNB | ILEM | 11 | -0.174 | 4.901 | -0.781 | 1.00 | 0.00 |
| ATOM | 191 | CA   | ILEM | 11 | 2.662  | 5.150 | -0.526 | 1.00 | 0.00 |
| ATOM | 192 | HA   | ILEM | 11 | 2.313  | 5.687 | -1.427 | 1.00 | 0.00 |
| ATOM | 193 | CB   | ILEM | 11 | 3.899  | 5.933 | 0.075  | 1.00 | 0.00 |
| ATOM | 194 | HB   | ILEM | 11 | 3.694  | 6.067 | 1.157  | 1.00 | 0.00 |
| ATOM | 195 | QG2  | ILEM | 11 | 5.601  | 4.930 | -0.103 | 1.00 | 0.00 |
| ATOM | 196 | CG2  | ILEM | 11 | 5.237  | 5.142 | -0.058 | 1.00 | 0.00 |
| ATOM | 197 | 1HG2 | ILEM | 11 | 5.404  | 4.767 | -1.083 | 1.00 | 0.00 |
| ATOM | 198 | 2HG2 | ILEM | 11 | 6.129  | 5.757 | 0.158  | 1.00 | 0.00 |
| ATOM | 199 | 3HG2 | ILEM | 11 | 5.271  | 4.266 | 0.616  | 1.00 | 0.00 |
| ATOM | 200 | CG1  | ILEM | 11 | 4.118  | 7.360 | -0.521 | 1.00 | 0.00 |
| ATOM | 201 | 2HG1 | ILEM | 11 | 4.408  | 8.058 | 0.287  | 1.00 | 0.00 |
| ATOM | 202 | QG1  | ILEM | 11 | 4.408  | 8.058 | 0.287  | 1.00 | 0.00 |
| ATOM | 203 | QD1  | ILEM | 11 | 5.516  | 7.517 | -1.877 | 1.00 | 0.00 |
| ATOM | 204 | CD1  | ILEM | 11 | 5.219  | 7.479 | -1.595 | 1.00 | 0.00 |
| ATOM | 205 | 1HD1 | ILEM | 11 | 5.812  | 8.404 | -1.459 | 1.00 | 0.00 |
| ATOM | 206 | 2HD1 | ILEM | 11 | 5.927  | 6.631 | -1.552 | 1.00 | 0.00 |
| ATOM | 207 | 3HD1 | ILEM | 11 | 4.809  | 7.517 | -2.620 | 1.00 | 0.00 |
| ATOM | 208 | C    | ILEM | 11 | 3.041  | 3.760 | -0.977 | 1.00 | 0.00 |
| ATOM | 209 | O    | ILEM | 11 | 2.782  | 2.756 | -0.297 | 1.00 | 0.00 |
| ATOM | 210 | N    | PIPO | 12 | 3.666  | 3.678 | -2.136 | 1.00 | 0.00 |
| ATOM | 211 | CE   | PIPO | 12 | 4.093  | 2.417 | -2.703 | 1.00 | 0.00 |
| ATOM | 212 | CA   | PIPO | 12 | 3.989  | 4.851 | -2.934 | 1.00 | 0.00 |
| ATOM | 213 | HA   | PIPO | 12 | 4.471  | 5.624 | -2.336 | 1.00 | 0.00 |
| ATOM | 214 | CB   | PIPO | 12 | 4.948  | 4.505 | -4.090 | 1.00 | 0.00 |
| ATOM | 215 | 2HB  | PIPO | 12 | 5.166  | 5.406 | -4.663 | 1.00 | 0.00 |
| ATOM | 216 | 3HB  | PIPO | 12 | 5.874  | 4.098 | -3.684 | 1.00 | 0.00 |
| ATOM | 217 | QB   | PIPO | 12 | 5.520  | 4.752 | -4.173 | 1.00 | 0.00 |
| ATOM | 218 | CG   | PIPO | 12 | 4.289  | 3.459 | -5.008 | 1.00 | 0.00 |
| ATOM | 219 | 2HG  | PIPO | 12 | 4.967  | 3.215 | -5.825 | 1.00 | 0.00 |
| ATOM | 220 | 3HG  | PIPO | 12 | 3.362  | 3.865 | -5.415 | 1.00 | 0.00 |
| ATOM | 221 | QG   | PIPO | 12 | 4.165  | 3.540 | -5.620 | 1.00 | 0.00 |
| ATOM | 222 | CD   | PIPO | 12 | 3.937  | 2.462 | -4.234 | 1.00 | 0.00 |
| ATOM | 223 | 2HD  | PIPO | 12 | 4.261  | 1.512 | -4.660 | 1.00 | 0.00 |
| ATOM | 224 | 3HD  | PIPO | 12 | 2.893  | 2.637 | -4.488 | 1.00 | 0.00 |
| ATOM | 225 | QD   | PIPO | 12 | 3.577  | 2.074 | -4.574 | 1.00 | 0.00 |
| ATOM | 226 | 1HE  | PIPO | 12 | 5.138  | 2.241 | -2.449 | 1.00 | 0.00 |
| ATOM | 227 | 2HE  | PIPO | 12 | 3.481  | 1.610 | -2.299 | 1.00 | 0.00 |
| ATOM | 228 | QE   | PIPO | 12 | 4.310  | 1.926 | -2.374 | 1.00 | 0.00 |
| ATOM | 229 | C    | PIPO | 12 | 2.731  | 5.477 | -3.559 | 1.00 | 0.00 |
| ATOM | 230 | O    | PIPO | 12 | 2.535  | 6.685 | -3.381 | 1.00 | 0.00 |
| ATOM | 231 | O1'  | PHEO | 13 | 1.903  | 4.731 | -4.268 | 1.00 | 0.00 |
| ATOM | 232 | CA   | PHEO | 13 | 0.504  | 5.099 | -4.462 | 1.00 | 0.00 |
| ATOM | 233 | HA   | PHEO | 13 | 0.434  | 6.006 | -5.091 | 1.00 | 0.00 |
| ATOM | 234 | CB   | PHEO | 13 | -0.147 | 5.365 | -3.070 | 1.00 | 0.00 |
| ATOM | 235 | 2HB  | PHEO | 13 | 0.636  | 5.688 | -2.355 | 1.00 | 0.00 |
| ATOM | 236 | QB   | PHEO | 13 | 0.636  | 5.688 | -2.355 | 1.00 | 0.00 |
| ATOM | 237 | QD   | PHEO | 13 | -1.404 | 6.516 | -3.007 | 1.00 | 0.00 |
| ATOM | 238 | QE   | PHEO | 13 | -3.175 | 8.220 | -2.858 | 1.00 | 0.00 |
| ATOM | 239 | QR   | PHEO | 13 | -2.645 | 7.710 | -2.902 | 1.00 | 0.00 |
| ATOM | 240 | CG   | PHEO | 13 | -1.290 | 6.391 | -3.035 | 1.00 | 0.00 |
| ATOM | 241 | CD1  | PHEO | 13 | -1.095 | 7.662 | -3.586 | 1.00 | 0.00 |
| ATOM | 242 | 1HD  | PHEO | 13 | -0.152 | 7.916 | -4.050 | 1.00 | 0.00 |
| ATOM | 243 | CE1  | PHEO | 13 | -2.092 | 8.628 | -3.490 | 1.00 | 0.00 |
| ATOM | 244 | 1HE  | PHEO | 13 | -1.919 | 9.617 | -3.892 | 1.00 | 0.00 |
| ATOM | 245 | CZ   | PHEO | 13 | -3.295 | 8.325 | -2.860 | 1.00 | 0.00 |

|          |     |      |      |    |        |        |        |      |      |
|----------|-----|------|------|----|--------|--------|--------|------|------|
| ATOM     | 246 | HZ   | PHEO | 13 | -4.065 | 9.078  | -2.782 | 1.00 | 0.00 |
| ATOM     | 247 | CE2  | PHEO | 13 | -3.501 | 7.056  | -2.320 | 1.00 | 0.00 |
| ATOM     | 248 | 2HE  | PHEO | 13 | -4.432 | 6.823  | -1.823 | 1.00 | 0.00 |
| ATOM     | 249 | CD2  | PHEO | 13 | -2.500 | 6.091  | -2.404 | 1.00 | 0.00 |
| ATOM     | 250 | 2HD  | PHEO | 13 | -2.657 | 5.117  | -1.965 | 1.00 | 0.00 |
| ATOM     | 251 | C    | PHEO | 13 | -0.261 | 3.982  | -5.130 | 1.00 | 0.00 |
| ATOM     | 252 | O    | PHEO | 13 | -1.473 | 4.107  | -5.463 | 1.00 | 0.00 |
| TER      |     |      |      |    |        |        |        |      |      |
| ENDMDL   |     |      |      |    |        |        |        |      |      |
| MODEL 20 |     |      |      |    |        |        |        |      |      |
| ATOM     | 1   | N    | VALM | 1  | -0.155 | 3.125  | -5.139 | 1.00 | 0.00 |
| ATOM     | 2   | QB   | VALM | 1  | -0.655 | 3.490  | -6.875 | 1.00 | 0.00 |
| ATOM     | 3   | CN   | VALM | 1  | -0.556 | 3.418  | -6.533 | 1.00 | 0.00 |
| ATOM     | 4   | 1HNB | VALM | 1  | 0.329  | 3.443  | -7.169 | 1.00 | 0.00 |
| ATOM     | 5   | 2HNB | VALM | 1  | -1.236 | 2.642  | -6.886 | 1.00 | 0.00 |
| ATOM     | 6   | 3HNB | VALM | 1  | -1.058 | 4.385  | -6.571 | 1.00 | 0.00 |
| ATOM     | 7   | CA   | VALM | 1  | -0.364 | 1.814  | -4.533 | 1.00 | 0.00 |
| ATOM     | 8   | HA   | VALM | 1  | -1.389 | 1.771  | -4.122 | 1.00 | 0.00 |
| ATOM     | 9   | CB   | VALM | 1  | -0.191 | 0.685  | -5.625 | 1.00 | 0.00 |
| ATOM     | 10  | HB   | VALM | 1  | -0.087 | -0.280 | -5.084 | 1.00 | 0.00 |
| ATOM     | 11  | QG1  | VALM | 1  | -1.684 | 0.448  | -6.897 | 1.00 | 0.00 |
| ATOM     | 12  | QG2  | VALM | 1  | 1.406  | 0.890  | -6.744 | 1.00 | 0.00 |
| ATOM     | 13  | CG1  | VALM | 1  | -1.367 | 0.507  | -6.624 | 1.00 | 0.00 |
| ATOM     | 14  | 1HG1 | VALM | 1  | -1.945 | 1.439  | -6.768 | 1.00 | 0.00 |
| ATOM     | 15  | 2HG1 | VALM | 1  | -1.023 | 0.177  | -7.623 | 1.00 | 0.00 |
| ATOM     | 16  | 3HG1 | VALM | 1  | -2.082 | -0.274 | -6.301 | 1.00 | 0.00 |
| ATOM     | 17  | CG2  | VALM | 1  | 1.071  | 0.852  | -6.505 | 1.00 | 0.00 |
| ATOM     | 18  | 1HG2 | VALM | 1  | 1.666  | 1.739  | -6.220 | 1.00 | 0.00 |
| ATOM     | 19  | 2HG2 | VALM | 1  | 1.739  | -0.026 | -6.436 | 1.00 | 0.00 |
| ATOM     | 20  | 3HG2 | VALM | 1  | 0.814  | 0.958  | -7.576 | 1.00 | 0.00 |
| ATOM     | 21  | QQG  | VALM | 1  | -0.139 | 0.669  | -6.821 | 1.00 | 0.00 |
| ATOM     | 22  | C    | VALM | 1  | 0.584  | 1.594  | -3.377 | 1.00 | 0.00 |
| ATOM     | 23  | O    | VALM | 1  | 1.566  | 2.323  | -3.253 | 1.00 | 0.00 |
| ATOM     | 24  | N    | PRO  | 2  | 0.271  | 0.573  | -2.536 | 1.00 | 0.00 |
| ATOM     | 25  | CD   | PRO  | 2  | -0.884 | -0.313 | -2.653 | 1.00 | 0.00 |
| ATOM     | 26  | CA   | PRO  | 2  | 1.108  | 0.265  | -1.388 | 1.00 | 0.00 |
| ATOM     | 27  | HA   | PRO  | 2  | 1.398  | 1.108  | -0.935 | 1.00 | 0.00 |
| ATOM     | 28  | CB   | PRO  | 2  | 0.237  | -0.590 | -0.484 | 1.00 | 0.00 |
| ATOM     | 29  | 2HB  | PRO  | 2  | -0.159 | -0.004 | 0.346  | 1.00 | 0.00 |
| ATOM     | 30  | QB   | PRO  | 2  | -0.159 | -0.004 | 0.346  | 1.00 | 0.00 |
| ATOM     | 31  | CG   | PRO  | 2  | -0.887 | -1.116 | -1.362 | 1.00 | 0.00 |
| ATOM     | 32  | 2HG  | PRO  | 2  | -1.847 | -1.019 | -0.854 | 1.00 | 0.00 |
| ATOM     | 33  | QG   | PRO  | 2  | -1.847 | -1.019 | -0.854 | 1.00 | 0.00 |
| ATOM     | 34  | 2HD  | PRO  | 2  | -1.808 | 0.254  | -2.768 | 1.00 | 0.00 |
| ATOM     | 35  | QD   | PRO  | 2  | -1.808 | 0.254  | -2.768 | 1.00 | 0.00 |
| ATOM     | 36  | C    | PRO  | 2  | 2.394  | -0.441 | -1.822 | 1.00 | 0.00 |
| ATOM     | 37  | O    | PRO  | 2  | 2.445  | -1.044 | -2.893 | 1.00 | 0.00 |
| ATOM     | 38  | N    | ILE  | 3  | 3.402  | -0.342 | -0.968 | 1.00 | 0.00 |
| ATOM     | 39  | H    | ILE  | 3  | 3.353  | 0.150  | -0.099 | 1.00 | 0.00 |
| ATOM     | 40  | CA   | ILE  | 3  | 4.685  | -0.964 | -1.249 | 1.00 | 0.00 |
| ATOM     | 41  | HA   | ILE  | 3  | 4.710  | -1.193 | -2.315 | 1.00 | 0.00 |
| ATOM     | 42  | CB   | ILE  | 3  | 5.827  | 0.015  | -0.970 | 1.00 | 0.00 |
| ATOM     | 43  | HB   | ILE  | 3  | 6.519  | -0.459 | -0.272 | 1.00 | 0.00 |
| ATOM     | 44  | QG2  | ILE  | 3  | 6.799  | 0.393  | -2.550 | 1.00 | 0.00 |
| ATOM     | 45  | CG2  | ILE  | 3  | 6.612  | 0.320  | -2.247 | 1.00 | 0.00 |
| ATOM     | 46  | 1HG2 | ILE  | 3  | 7.115  | 1.282  | -2.143 | 1.00 | 0.00 |
| ATOM     | 47  | 2HG2 | ILE  | 3  | 7.354  | -0.461 | -2.414 | 1.00 | 0.00 |
| ATOM     | 48  | 3HG2 | ILE  | 3  | 5.927  | 0.359  | -3.093 | 1.00 | 0.00 |
| ATOM     | 49  | CG1  | ILE  | 3  | 5.308  | 1.287  | -0.298 | 1.00 | 0.00 |

|      |     |      |      |   |        |        |        |      |      |
|------|-----|------|------|---|--------|--------|--------|------|------|
| ATOM | 50  | 2HG1 | ILE  | 3 | 4.367  | 1.589  | -0.760 | 1.00 | 0.00 |
| ATOM | 51  | QG1  | ILE  | 3 | 4.367  | 1.589  | -0.760 | 1.00 | 0.00 |
| ATOM | 52  | QD1  | ILE  | 3 | 5.048  | 1.017  | 1.558  | 1.00 | 0.00 |
| ATOM | 53  | CD1  | ILE  | 3 | 5.098  | 1.069  | 1.202  | 1.00 | 0.00 |
| ATOM | 54  | 1HD1 | ILE  | 3 | 5.592  | 1.865  | 1.758  | 1.00 | 0.00 |
| ATOM | 55  | 2HD1 | ILE  | 3 | 4.031  | 1.078  | 1.425  | 1.00 | 0.00 |
| ATOM | 56  | 3HD1 | ILE  | 3 | 5.521  | 0.107  | 1.492  | 1.00 | 0.00 |
| ATOM | 57  | C    | ILE  | 3 | 4.793  | -2.275 | -0.469 | 1.00 | 0.00 |
| ATOM | 58  | O    | ILE  | 3 | 5.315  | -3.299 | -0.936 | 1.00 | 0.00 |
| ATOM | 59  | N    | PIP  | 4 | 4.288  | -2.242 | 0.751  | 1.00 | 0.00 |
| ATOM | 60  | CE   | PIP  | 4 | 3.677  | -1.055 | 1.307  | 1.00 | 0.00 |
| ATOM | 61  | CA   | PIP  | 4 | 4.319  | -3.393 | 1.641  | 1.00 | 0.00 |
| ATOM | 62  | HA   | PIP  | 4 | 5.313  | -3.837 | 1.690  | 1.00 | 0.00 |
| ATOM | 63  | CB   | PIP  | 4 | 3.919  | -3.009 | 3.077  | 1.00 | 0.00 |
| ATOM | 64  | 2HB  | PIP  | 4 | 3.953  | -3.894 | 3.713  | 1.00 | 0.00 |
| ATOM | 65  | 3HB  | PIP  | 4 | 4.611  | -2.259 | 3.460  | 1.00 | 0.00 |
| ATOM | 66  | QB   | PIP  | 4 | 4.282  | -3.077 | 3.587  | 1.00 | 0.00 |
| ATOM | 67  | CG   | PIP  | 4 | 2.490  | -2.434 | 3.078  | 1.00 | 0.00 |
| ATOM | 68  | 2HG  | PIP  | 4 | 2.207  | -2.162 | 4.094  | 1.00 | 0.00 |
| ATOM | 69  | 3HG  | PIP  | 4 | 1.796  | -3.182 | 2.696  | 1.00 | 0.00 |
| ATOM | 70  | QG   | PIP  | 4 | 2.001  | -2.672 | 3.395  | 1.00 | 0.00 |
| ATOM | 71  | CD   | PIP  | 4 | 2.490  | -1.459 | 2.200  | 1.00 | 0.00 |
| ATOM | 72  | 2HD  | PIP  | 4 | 2.029  | -0.564 | 2.620  | 1.00 | 0.00 |
| ATOM | 73  | 3HD  | PIP  | 4 | 1.754  | -2.001 | 1.606  | 1.00 | 0.00 |
| ATOM | 74  | QD   | PIP  | 4 | 1.891  | -1.283 | 2.113  | 1.00 | 0.00 |
| ATOM | 75  | 1HE  | PIP  | 4 | 4.411  | -0.514 | 1.903  | 1.00 | 0.00 |
| ATOM | 76  | 2HE  | PIP  | 4 | 3.322  | -0.415 | 0.499  | 1.00 | 0.00 |
| ATOM | 77  | QE   | PIP  | 4 | 3.866  | -0.464 | 1.201  | 1.00 | 0.00 |
| ATOM | 78  | C    | PIP  | 4 | 3.351  | -4.494 | 1.177  | 1.00 | 0.00 |
| ATOM | 79  | O    | PIP  | 4 | 2.723  | -4.247 | 0.149  | 1.00 | 0.00 |
| ATOM | 80  | N    | ALA  | 5 | 3.245  | -5.619 | 1.871  | 1.00 | 0.00 |
| ATOM | 81  | H    | ALA  | 5 | 3.759  | -5.811 | 2.706  | 1.00 | 0.00 |
| ATOM | 82  | CA   | ALA  | 5 | 2.344  | -6.677 | 1.446  | 1.00 | 0.00 |
| ATOM | 83  | HA   | ALA  | 5 | 2.784  | -7.156 | 0.572  | 1.00 | 0.00 |
| ATOM | 84  | QB   | ALA  | 5 | 2.182  | -7.960 | 2.829  | 1.00 | 0.00 |
| ATOM | 85  | CB   | ALA  | 5 | 2.213  | -7.714 | 2.563  | 1.00 | 0.00 |
| ATOM | 86  | 1HB  | ALA  | 5 | 3.185  | -8.173 | 2.750  | 1.00 | 0.00 |
| ATOM | 87  | 2HB  | ALA  | 5 | 1.861  | -7.226 | 3.472  | 1.00 | 0.00 |
| ATOM | 88  | 3HB  | ALA  | 5 | 1.500  | -8.483 | 2.264  | 1.00 | 0.00 |
| ATOM | 89  | C    | ALA  | 5 | 0.996  | -6.067 | 1.056  | 1.00 | 0.00 |
| ATOM | 90  | O    | ALA  | 5 | 0.639  | -4.989 | 1.526  | 1.00 | 0.00 |
| ATOM | 91  | N    | PRO  | 6 | 0.266  | -6.803 | 0.175  | 1.00 | 0.00 |
| ATOM | 92  | CD   | PRO  | 6 | 0.658  | -8.085 | -0.403 | 1.00 | 0.00 |
| ATOM | 93  | CA   | PRO  | 6 | -1.035 | -6.347 | -0.284 | 1.00 | 0.00 |
| ATOM | 94  | HA   | PRO  | 6 | -1.010 | -5.366 | -0.478 | 1.00 | 0.00 |
| ATOM | 95  | CB   | PRO  | 6 | -1.318 | -7.163 | -1.535 | 1.00 | 0.00 |
| ATOM | 96  | 2HB  | PRO  | 6 | -1.135 | -6.576 | -2.434 | 1.00 | 0.00 |
| ATOM | 97  | QB   | PRO  | 6 | -1.135 | -6.576 | -2.434 | 1.00 | 0.00 |
| ATOM | 98  | CG   | PRO  | 6 | -0.390 | -8.364 | -1.468 | 1.00 | 0.00 |
| ATOM | 99  | 2HG  | PRO  | 6 | 0.084  | -8.534 | -2.435 | 1.00 | 0.00 |
| ATOM | 100 | QG   | PRO  | 6 | 0.084  | -8.534 | -2.435 | 1.00 | 0.00 |
| ATOM | 101 | 2HD  | PRO  | 6 | 1.658  | -8.037 | -0.834 | 1.00 | 0.00 |
| ATOM | 102 | QD   | PRO  | 6 | 1.658  | -8.037 | -0.834 | 1.00 | 0.00 |
| ATOM | 103 | C    | PRO  | 6 | -2.096 | -6.531 | 0.804  | 1.00 | 0.00 |
| ATOM | 104 | O    | PRO  | 6 | -2.435 | -7.639 | 1.232  | 1.00 | 0.00 |
| ATOM | 105 | N    | THRM | 7 | -2.629 | -5.411 | 1.257  | 1.00 | 0.00 |
| ATOM | 106 | QB   | THRM | 7 | -3.911 | -5.600 | 2.568  | 1.00 | 0.00 |
| ATOM | 107 | CN   | THRM | 7 | -3.658 | -5.563 | 2.310  | 1.00 | 0.00 |
| ATOM | 108 | 1HNB | THRM | 7 | -3.798 | -6.621 | 2.531  | 1.00 | 0.00 |

|      |     |      |      |    |        |        |        |      |      |
|------|-----|------|------|----|--------|--------|--------|------|------|
| ATOM | 109 | 2HNB | THRM | 7  | -3.335 | -5.042 | 3.211  | 1.00 | 0.00 |
| ATOM | 110 | 3HNB | THRM | 7  | -4.599 | -5.138 | 1.961  | 1.00 | 0.00 |
| ATOM | 111 | CA   | THRM | 7  | -2.227 | -4.102 | 0.750  | 1.00 | 0.00 |
| ATOM | 112 | HA   | THRM | 7  | -1.125 | -4.078 | 0.681  | 1.00 | 0.00 |
| ATOM | 113 | CB   | THRM | 7  | -2.826 | -3.857 | -0.675 | 1.00 | 0.00 |
| ATOM | 114 | HB   | THRM | 7  | -1.996 | -3.577 | -1.360 | 1.00 | 0.00 |
| ATOM | 115 | QG2  | THRM | 7  | -3.809 | -5.354 | -1.474 | 1.00 | 0.00 |
| ATOM | 116 | OG1  | THRM | 7  | -3.767 | -2.792 | -0.644 | 1.00 | 0.00 |
| ATOM | 117 | 1HG  | THRM | 7  | -3.299 | -2.033 | -0.282 | 1.00 | 0.00 |
| ATOM | 118 | CG2  | THRM | 7  | -3.598 | -5.036 | -1.306 | 1.00 | 0.00 |
| ATOM | 119 | 1HG2 | THRM | 7  | -3.912 | -5.779 | -0.551 | 1.00 | 0.00 |
| ATOM | 120 | 2HG2 | THRM | 7  | -4.527 | -4.712 | -1.812 | 1.00 | 0.00 |
| ATOM | 121 | 3HG2 | THRM | 7  | -2.988 | -5.570 | -2.059 | 1.00 | 0.00 |
| ATOM | 122 | C    | THRM | 7  | -2.642 | -3.004 | 1.699  | 1.00 | 0.00 |
| ATOM | 123 | O    | THRM | 7  | -3.463 | -3.245 | 2.583  | 1.00 | 0.00 |
| ATOM | 124 | N    | VAL  | 8  | -2.074 | -1.823 | 1.505  | 1.00 | 0.00 |
| ATOM | 125 | H    | VAL  | 8  | -1.407 | -1.635 | 0.785  | 1.00 | 0.00 |
| ATOM | 126 | CA   | VAL  | 8  | -2.395 | -0.689 | 2.356  | 1.00 | 0.00 |
| ATOM | 127 | HA   | VAL  | 8  | -3.420 | -0.817 | 2.702  | 1.00 | 0.00 |
| ATOM | 128 | CB   | VAL  | 8  | -1.479 | -0.679 | 3.582  | 1.00 | 0.00 |
| ATOM | 129 | HB   | VAL  | 8  | -1.254 | 0.360  | 3.824  | 1.00 | 0.00 |
| ATOM | 130 | QG1  | VAL  | 8  | -2.342 | -1.452 | 5.080  | 1.00 | 0.00 |
| ATOM | 131 | QG2  | VAL  | 8  | 0.157  | -1.558 | 3.214  | 1.00 | 0.00 |
| ATOM | 132 | CG1  | VAL  | 8  | -2.177 | -1.303 | 4.793  | 1.00 | 0.00 |
| ATOM | 133 | 1HG1 | VAL  | 8  | -2.405 | -0.526 | 5.521  | 1.00 | 0.00 |
| ATOM | 134 | 2HG1 | VAL  | 8  | -3.101 | -1.784 | 4.471  | 1.00 | 0.00 |
| ATOM | 135 | 3HG1 | VAL  | 8  | -1.520 | -2.045 | 5.247  | 1.00 | 0.00 |
| ATOM | 136 | CG2  | VAL  | 8  | -0.157 | -1.389 | 3.284  | 1.00 | 0.00 |
| ATOM | 137 | 1HG2 | VAL  | 8  | -0.273 | -2.459 | 3.457  | 1.00 | 0.00 |
| ATOM | 138 | 2HG2 | VAL  | 8  | 0.123  | -1.216 | 2.245  | 1.00 | 0.00 |
| ATOM | 139 | 3HG2 | VAL  | 8  | 0.621  | -0.998 | 3.940  | 1.00 | 0.00 |
| ATOM | 140 | QQG  | VAL  | 8  | -1.092 | -1.505 | 4.147  | 1.00 | 0.00 |
| ATOM | 141 | C    | VAL  | 8  | -2.309 | 0.599  | 1.536  | 1.00 | 0.00 |
| ATOM | 142 | O    | VAL  | 8  | -1.874 | 0.633  | 0.379  | 1.00 | 0.00 |
| ATOM | 143 | N    | THRM | 9  | -2.737 | 1.684  | 2.154  | 1.00 | 0.00 |
| ATOM | 144 | QB   | THRM | 9  | -3.351 | 1.443  | 3.876  | 1.00 | 0.00 |
| ATOM | 145 | CN   | THRM | 9  | -3.231 | 1.492  | 3.536  | 1.00 | 0.00 |
| ATOM | 146 | 1HNB | THRM | 9  | -3.149 | 0.438  | 3.808  | 1.00 | 0.00 |
| ATOM | 147 | 2HNB | THRM | 9  | -2.633 | 2.091  | 4.222  | 1.00 | 0.00 |
| ATOM | 148 | 3HNB | THRM | 9  | -4.273 | 1.801  | 3.596  | 1.00 | 0.00 |
| ATOM | 149 | CA   | THRM | 9  | -2.725 | 2.995  | 1.512  | 1.00 | 0.00 |
| ATOM | 150 | HA   | THRM | 9  | -2.393 | 2.869  | 0.466  | 1.00 | 0.00 |
| ATOM | 151 | CB   | THRM | 9  | -4.160 | 3.622  | 1.513  | 1.00 | 0.00 |
| ATOM | 152 | HB   | THRM | 9  | -4.124 | 4.579  | 0.950  | 1.00 | 0.00 |
| ATOM | 153 | QG2  | THRM | 9  | -5.589 | 2.512  | 0.757  | 1.00 | 0.00 |
| ATOM | 154 | OG1  | THRM | 9  | -4.584 | 3.893  | 2.842  | 1.00 | 0.00 |
| ATOM | 155 | 1HG  | THRM | 9  | -5.359 | 3.343  | 2.994  | 1.00 | 0.00 |
| ATOM | 156 | CG2  | THRM | 9  | -5.287 | 2.750  | 0.918  | 1.00 | 0.00 |
| ATOM | 157 | 1HG2 | THRM | 9  | -4.994 | 2.289  | -0.043 | 1.00 | 0.00 |
| ATOM | 158 | 2HG2 | THRM | 9  | -5.565 | 1.909  | 1.581  | 1.00 | 0.00 |
| ATOM | 159 | 3HG2 | THRM | 9  | -6.207 | 3.337  | 0.734  | 1.00 | 0.00 |
| ATOM | 160 | C    | THRM | 9  | -1.740 | 3.918  | 2.189  | 1.00 | 0.00 |
| ATOM | 161 | O    | THRM | 9  | -2.100 | 4.865  | 2.860  | 1.00 | 0.00 |
| ATOM | 162 | N    | VALM | 10 | -0.463 | 3.636  | 2.008  | 1.00 | 0.00 |
| ATOM | 163 | QB   | VALM | 10 | -0.103 | 2.162  | 0.960  | 1.00 | 0.00 |
| ATOM | 164 | CN   | VALM | 10 | -0.174 | 2.453  | 1.167  | 1.00 | 0.00 |
| ATOM | 165 | 1HNB | VALM | 10 | -0.774 | 2.497  | 0.258  | 1.00 | 0.00 |
| ATOM | 166 | 2HNB | VALM | 10 | 0.884  | 2.444  | 0.904  | 1.00 | 0.00 |
| ATOM | 167 | 3HNB | VALM | 10 | -0.418 | 1.545  | 1.720  | 1.00 | 0.00 |

|      |     |      |      |    |        |       |        |      |      |
|------|-----|------|------|----|--------|-------|--------|------|------|
| ATOM | 168 | CA   | VALM | 10 | 0.600  | 4.443 | 2.602  | 1.00 | 0.00 |
| ATOM | 169 | HA   | VALM | 10 | 0.256  | 5.491 | 2.669  | 1.00 | 0.00 |
| ATOM | 170 | CB   | VALM | 10 | 0.932  | 3.907 | 4.050  | 1.00 | 0.00 |
| ATOM | 171 | HB   | VALM | 10 | 1.851  | 3.288 | 3.968  | 1.00 | 0.00 |
| ATOM | 172 | QG1  | VALM | 10 | 1.310  | 5.271 | 5.430  | 1.00 | 0.00 |
| ATOM | 173 | QG2  | VALM | 10 | -0.466 | 2.770 | 4.824  | 1.00 | 0.00 |
| ATOM | 174 | CG1  | VALM | 10 | 1.222  | 4.983 | 5.134  | 1.00 | 0.00 |
| ATOM | 175 | 1HG1 | VALM | 10 | 0.410  | 5.731 | 5.216  | 1.00 | 0.00 |
| ATOM | 176 | 2HG1 | VALM | 10 | 1.363  | 4.541 | 6.138  | 1.00 | 0.00 |
| ATOM | 177 | 3HG1 | VALM | 10 | 2.158  | 5.540 | 4.936  | 1.00 | 0.00 |
| ATOM | 178 | CG2  | VALM | 10 | -0.171 | 3.006 | 4.656  | 1.00 | 0.00 |
| ATOM | 179 | 1HG2 | VALM | 10 | -0.459 | 2.183 | 3.977  | 1.00 | 0.00 |
| ATOM | 180 | 2HG2 | VALM | 10 | 0.150  | 2.546 | 5.608  | 1.00 | 0.00 |
| ATOM | 181 | 3HG2 | VALM | 10 | -1.089 | 3.580 | 4.887  | 1.00 | 0.00 |
| ATOM | 182 | QQG  | VALM | 10 | 0.422  | 4.020 | 5.127  | 1.00 | 0.00 |
| ATOM | 183 | C    | VALM | 10 | 1.833  | 4.437 | 1.731  | 1.00 | 0.00 |
| ATOM | 184 | O    | VALM | 10 | 2.907  | 3.962 | 2.118  | 1.00 | 0.00 |
| ATOM | 185 | N    | ILEM | 11 | 1.697  | 4.971 | 0.531  | 1.00 | 0.00 |
| ATOM | 186 | QB   | ILEM | 11 | 0.023  | 5.630 | 0.126  | 1.00 | 0.00 |
| ATOM | 187 | CN   | ILEM | 11 | 0.353  | 5.500 | 0.206  | 1.00 | 0.00 |
| ATOM | 188 | 1HNB | ILEM | 11 | -0.313 | 5.347 | 1.054  | 1.00 | 0.00 |
| ATOM | 189 | 2HNB | ILEM | 11 | 0.425  | 6.565 | -0.012 | 1.00 | 0.00 |
| ATOM | 190 | 3HNB | ILEM | 11 | -0.043 | 4.978 | -0.665 | 1.00 | 0.00 |
| ATOM | 191 | CA   | ILEM | 11 | 2.804  | 5.035 | -0.417 | 1.00 | 0.00 |
| ATOM | 192 | HA   | ILEM | 11 | 2.479  | 5.663 | -1.269 | 1.00 | 0.00 |
| ATOM | 193 | CB   | ILEM | 11 | 4.083  | 5.702 | 0.234  | 1.00 | 0.00 |
| ATOM | 194 | HB   | ILEM | 11 | 3.912  | 5.710 | 1.331  | 1.00 | 0.00 |
| ATOM | 195 | QG2  | ILEM | 11 | 5.741  | 4.665 | -0.104 | 1.00 | 0.00 |
| ATOM | 196 | CG2  | ILEM | 11 | 5.390  | 4.893 | -0.034 | 1.00 | 0.00 |
| ATOM | 197 | 1HG2 | ILEM | 11 | 5.456  | 3.982 | 0.587  | 1.00 | 0.00 |
| ATOM | 198 | 2HG2 | ILEM | 11 | 5.467  | 4.523 | -1.071 | 1.00 | 0.00 |
| ATOM | 199 | 3HG2 | ILEM | 11 | 6.298  | 5.490 | 0.172  | 1.00 | 0.00 |
| ATOM | 200 | CG1  | ILEM | 11 | 4.334  | 7.185 | -0.194 | 1.00 | 0.00 |
| ATOM | 201 | 2HG1 | ILEM | 11 | 4.727  | 7.756 | 0.669  | 1.00 | 0.00 |
| ATOM | 202 | QG1  | ILEM | 11 | 4.727  | 7.756 | 0.669  | 1.00 | 0.00 |
| ATOM | 203 | QD1  | ILEM | 11 | 5.614  | 7.451 | -1.645 | 1.00 | 0.00 |
| ATOM | 204 | CD1  | ILEM | 11 | 5.349  | 7.394 | -1.336 | 1.00 | 0.00 |
| ATOM | 205 | 1HD1 | ILEM | 11 | 4.837  | 7.509 | -2.309 | 1.00 | 0.00 |
| ATOM | 206 | 2HD1 | ILEM | 11 | 5.959  | 8.303 | -1.181 | 1.00 | 0.00 |
| ATOM | 207 | 3HD1 | ILEM | 11 | 6.046  | 6.543 | -1.444 | 1.00 | 0.00 |
| ATOM | 208 | C    | ILEM | 11 | 3.110  | 3.670 | -0.985 | 1.00 | 0.00 |
| ATOM | 209 | O    | ILEM | 11 | 2.833  | 2.627 | -0.375 | 1.00 | 0.00 |
| ATOM | 210 | N    | PIPO | 12 | 3.691  | 3.652 | -2.171 | 1.00 | 0.00 |
| ATOM | 211 | CE   | PIPO | 12 | 4.046  | 2.423 | -2.845 | 1.00 | 0.00 |
| ATOM | 212 | CA   | PIPO | 12 | 4.035  | 4.869 | -2.890 | 1.00 | 0.00 |
| ATOM | 213 | HA   | PIPO | 12 | 4.569  | 5.575 | -2.253 | 1.00 | 0.00 |
| ATOM | 214 | CB   | PIPO | 12 | 4.939  | 4.576 | -4.102 | 1.00 | 0.00 |
| ATOM | 215 | 2HB  | PIPO | 12 | 5.175  | 5.509 | -4.614 | 1.00 | 0.00 |
| ATOM | 216 | 3HB  | PIPO | 12 | 5.860  | 4.104 | -3.763 | 1.00 | 0.00 |
| ATOM | 217 | QB   | PIPO | 12 | 5.518  | 4.807 | -4.188 | 1.00 | 0.00 |
| ATOM | 218 | CG   | PIPO | 12 | 4.206  | 3.630 | -5.072 | 1.00 | 0.00 |
| ATOM | 219 | 2HG  | PIPO | 12 | 4.845  | 3.422 | -5.930 | 1.00 | 0.00 |
| ATOM | 220 | 3HG  | PIPO | 12 | 3.284  | 4.101 | -5.412 | 1.00 | 0.00 |
| ATOM | 221 | QG   | PIPO | 12 | 4.065  | 3.761 | -5.671 | 1.00 | 0.00 |
| ATOM | 222 | CD   | PIPO | 12 | 3.841  | 2.590 | -4.362 | 1.00 | 0.00 |
| ATOM | 223 | 2HD  | PIPO | 12 | 4.109  | 1.664 | -4.870 | 1.00 | 0.00 |
| ATOM | 224 | 3HD  | PIPO | 12 | 2.796  | 2.825 | -4.563 | 1.00 | 0.00 |
| ATOM | 225 | QD   | PIPO | 12 | 3.453  | 2.245 | -4.717 | 1.00 | 0.00 |
| ATOM | 226 | 1HE  | PIPO | 12 | 5.092  | 2.188 | -2.644 | 1.00 | 0.00 |

|      |     |     |      |    |        |        |        |      |      |
|------|-----|-----|------|----|--------|--------|--------|------|------|
| ATOM | 227 | 2HE | PIPO | 12 | 3.416  | 1.613  | -2.481 | 1.00 | 0.00 |
| ATOM | 228 | QE  | PIPO | 12 | 4.254  | 1.900  | -2.563 | 1.00 | 0.00 |
| ATOM | 229 | C   | PIPO | 12 | 2.784  | 5.590  | -3.419 | 1.00 | 0.00 |
| ATOM | 230 | O   | PIPO | 12 | 2.638  | 6.784  | -3.132 | 1.00 | 0.00 |
| ATOM | 231 | O1' | PHEO | 13 | 1.910  | 4.937  | -4.162 | 1.00 | 0.00 |
| ATOM | 232 | CA  | PHEO | 13 | 0.506  | 5.331  | -4.230 | 1.00 | 0.00 |
| ATOM | 233 | HA  | PHEO | 13 | 0.377  | 6.153  | -4.957 | 1.00 | 0.00 |
| ATOM | 234 | CB  | PHEO | 13 | 0.041  | 5.795  | -2.815 | 1.00 | 0.00 |
| ATOM | 235 | 2HB | PHEO | 13 | 0.897  | 5.747  | -2.115 | 1.00 | 0.00 |
| ATOM | 236 | QB  | PHEO | 13 | 0.897  | 5.747  | -2.115 | 1.00 | 0.00 |
| ATOM | 237 | QD  | PHEO | 13 | -0.671 | 7.343  | -2.735 | 1.00 | 0.00 |
| ATOM | 238 | QE  | PHEO | 13 | -1.764 | 9.547  | -2.661 | 1.00 | 0.00 |
| ATOM | 239 | QR  | PHEO | 13 | -1.437 | 8.887  | -2.683 | 1.00 | 0.00 |
| ATOM | 240 | CG  | PHEO | 13 | -0.581 | 7.196  | -2.726 | 1.00 | 0.00 |
| ATOM | 241 | CD1 | PHEO | 13 | -1.678 | 7.413  | -1.884 | 1.00 | 0.00 |
| ATOM | 242 | 1HD | PHEO | 13 | -2.073 | 6.603  | -1.286 | 1.00 | 0.00 |
| ATOM | 243 | CE1 | PHEO | 13 | -2.303 | 8.654  | -1.851 | 1.00 | 0.00 |
| ATOM | 244 | 1HE | PHEO | 13 | -3.168 | 8.803  | -1.220 | 1.00 | 0.00 |
| ATOM | 245 | CZ  | PHEO | 13 | -1.826 | 9.693  | -2.647 | 1.00 | 0.00 |
| ATOM | 246 | HZ  | PHEO | 13 | -2.316 | 10.655 | -2.625 | 1.00 | 0.00 |
| ATOM | 247 | CE2 | PHEO | 13 | -0.727 | 9.488  | -3.480 | 1.00 | 0.00 |
| ATOM | 248 | 2HE | PHEO | 13 | -0.361 | 10.292 | -4.101 | 1.00 | 0.00 |
| ATOM | 249 | CD2 | PHEO | 13 | -0.106 | 8.242  | -3.521 | 1.00 | 0.00 |
| ATOM | 250 | 2HD | PHEO | 13 | 0.732  | 8.084  | -4.185 | 1.00 | 0.00 |
| ATOM | 251 | C   | PHEO | 13 | -0.363 | 4.168  | -4.649 | 1.00 | 0.00 |
| ATOM | 252 | O   | PHEO | 13 | -1.561 | 4.056  | -4.267 | 1.00 | 0.00 |

TER  
ENDMDL  
END
